# Supplementary material for: Silver-catalysed [3 + 2] annulation reaction of aryldiazonium salts with allenes enabled by boronate direction
Source: Royal Society of Chemistry journal article supplement (doi:10.1039/d2qo01585d), 2022-11-09
Supplement: d2qo01585d1.pdf [file d2qo01585d1.pdf]

# Silver-catalysed [3 + 2] annulation reaction of aryldiazonium salts with allenes enabled by boronate direction

Xing Peng,<sup>§,a</sup> Meng-Meng Zheng,<sup>§,b</sup> Pei Qin,<sup>a</sup> Xiao-Song Xue,<sup>\*,b,c</sup> Fa-Guang Zhang,<sup>\*,a</sup> and Jun-An Ma<sup>\*,a</sup>

<sup>a</sup> Department of Chemistry, Tianjin Key Laboratory of Molecular Optoelectronic Sciences, Frontiers Science Center for Synthetic Biology (Ministry of Education), and Tianjin Collaborative Innovation Centre of Chemical Science & Engineering, Tianjin University, Tianjin 300072, P. R. of China.

Email: zhangfg1987@tju.edu.cn; majun\_an68@tju.edu.cn

<sup>b</sup> State Key Laboratory of Elemento-organic Chemistry, Nankai University, Tianjin 300071, P. R. of China. Email: xuexs@sioc.ac.cn

<sup>c</sup> Key Laboratory of Organofluorine Chemistry, Shanghai Institute of Organic Chemistry, University of Chinese Academy of Sciences, Chinese Academy of Sciences, 345 Lingling Road, Shanghai 200032, P. R. of China

<sup>§</sup> These authors contributed equally to this work.

## Table of Contents

|                                   |    |
|-----------------------------------|----|
| General Information .....         | 2  |
| Important Safety Note.....        | 2  |
| Experimental Procedure.....       | 3  |
| Reaction Optimization .....       | 5  |
| Characterization Data .....       | 6  |
| Synthetic Transformations .....   | 17 |
| Mechanistic studies.....          | 25 |
| NMR Spectra .....                 | 27 |
| X-Ray crystallographic data ..... | 89 |
| Computational Results .....       | 92 |
| References.....                   | 94 |

## General Information

$^1\text{H}$ ,  $^{13}\text{C}$  and  $^{19}\text{F}$  were recorded on Bruker AV 400 MHz and JEOL AV 400 MHz instrument at 400 MHz ( $^1\text{H}$  NMR), 101 MHz ( $^{13}\text{C}$  NMR), as well as 376 MHz ( $^{19}\text{F}$  NMR). Meanwhile,  $^1\text{H}$ ,  $^{13}\text{C}$  and  $^{19}\text{F}$  were recorded on JEOL AV 600 MHz instrument at 600 MHz ( $^1\text{H}$  NMR), 151 MHz ( $^{13}\text{C}$  NMR), as well as 565 MHz ( $^{19}\text{F}$  NMR). Chemical shifts were reported in ppm down field from internal  $\text{Me}_4\text{Si}$  and external  $\text{CCl}_3\text{F}$ , respectively. Multiplicity was indicated as follows: s (singlet), d (doublet), t (triplet), q (quartet), m (multiplet), dd (doublet of doublet), br (broad). Coupling constants were reported in Hertz (Hz). High resolution mass spectrometry (HRMS) spectra were obtained on a Bruker mior OTOF-QII instrument. X-ray structural analysis was conducted on a Bruker APEX-II CCD instrument.

**Materials:** Tetrahydrofuran (THF) and toluene were distilled from sodium/benzophenone;  $\text{CH}_2\text{Cl}_2$  (DCM) was distilled from  $\text{CaH}_2$ ; Acetonitrile (MeCN), Methyl *tert*-butyl ether (MTBE), *N,N*-dimethylformamide (DMF), 1,4-Dioxane, 2-Allenyl-4,4,5,5-tetramethyl-1,3,2-dioxaborolane (**1a**), trimethyl(3-(4,4,5,5-tetramethyl-1,3,2-dioxaborolan-2-yl)prop-1-yn-1-yl)silane (**10a**) were purchased from commercial sources. Allenylboronates (**1b–1e**<sup>[1]</sup>, **1f–1j**<sup>[2]</sup>), 4,4,5,5-tetramethyl-2-(3-phenylprop-2-yn-1-yl)-1,3,2-dioxaborolane (**10b**<sup>[3]</sup>) were prepared according to the corresponding literature. All commercially available reagents were used without further purification.

Analytical thin layer chromatography was performed on 0.20 mm silica gel plates. Silica gel (200–300 mesh) was used for flash chromatography. All purchased reagents were used without further purification. Analytical thin layer chromatography was performed on 0.20 mm Qingdao Haiyang silica gel plates. Silica gel (200-300 mesh) (from Qingdao Haiyang Chem. Company, Ltd.) was used for flash chromatography.

## Important Safety Note

Handling of aryl diazonium salts should be done in a well-ventilated fume cupboard. No incidents occurred handling of these reagents during this study, yet the readers should be aware of carcinogenicity and explosiveness of the herein described diazonium salts. General safety precautions when working with diazonium salts should be followed. Any reactions described in this manuscript should not be performed without strict risk assessment.

## Experimental Procedure

### General procedure for the synthesis of allenylboronates. (Method 1).

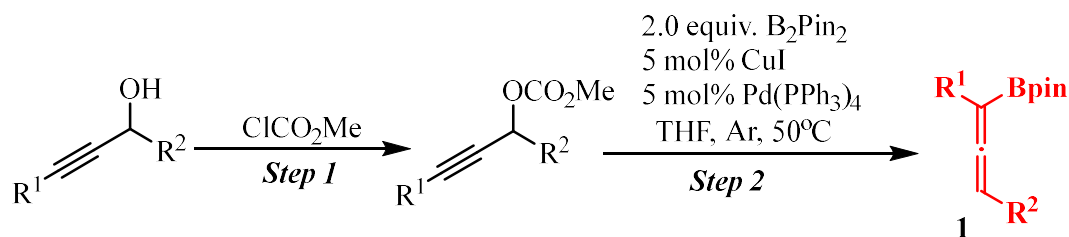

**Step 1:** Compounds **1b–1e** were synthesized according to previously reported procedure<sup>[1]</sup>. A flask was charged with the propargylic alcohol (1.0 equiv., 10 mmol) and  $\text{CH}_2\text{Cl}_2$  (20 mL) and cooled to 0 °C. Pyridine (4.0 equiv., 40 mmol) and  $\text{ClCO}_2\text{Me}$  (2.0 equiv., 20 mmol) were subsequently added to the solution. The reaction was stirred for 10 hours, after which it was quenched by the addition of  $\text{H}_2\text{O}$ . The mixture was extracted with  $\text{CH}_2\text{Cl}_2$  and the combined organic phases were washed with brine and dried over  $\text{MgSO}_4$ . After filtration, the solvent was removed *in vacuo*. The product was purified with flash column chromatography (pentane:EtOAc 25:1) as clear oil.

**Step 2:** Inside a glove box, a 50 mL Schlenk tube equipped with a Teflon coated stirring bar was charged with copper iodide (5 mol%, 47.6 mg, 0.25 mmol),  $\text{Pd}(\text{PPh}_3)_4$  (5 mol%, 289 mg, 0.25 mmol),  $\text{B}_2\text{pin}_2$  (2.0 equiv., 2.54 g, 10 mmol) and THF (20 mL). The mixture was pre-stirred for 10-15 seconds after which the non-terminal propargylic carbonate (5 mmol) was added to the mixture. The vial was then closed, brought outside the glove box and heated to 50 °C for 16 hours. After the reaction was finished the content of the vial was washed out with pentane and concentrated under reduced pressure. The remaining content was dissolved in pentane and purified by flash column chromatography. **Caution:** A rapid column chromatography (within 10 minutes) was required to receive reproducible results due to the relatively low stability of the allenyl-Bpin products on silica.

### General procedure for the synthesis of allenylboronates. (Method 2).

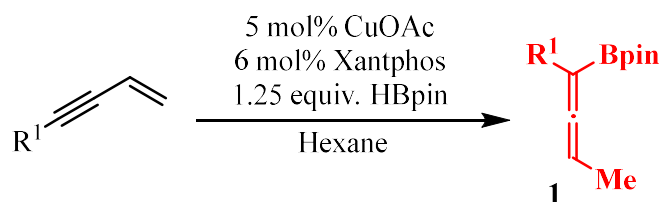

Compounds **1f–1j** were synthesized according to previously reported procedure<sup>[2]</sup>. An oven-dried 25 mL Schlenk tube equipped with a stir bar was charged with Xantphos (CAS:161265-03-8, 6 mol%, 0.12 mmol, 70 mg),  $\text{CuOAc}$  (5 mol%, 0.1 mmol, 12.3 mg), and hexane (10 mL) in a nitrogen-filled glove box. The mixture was allowed to stir for 30 min under  $\text{N}_2$  at 22 °C.  $\text{HBpin}$  (CAS: 25015-63-8, 2.5 equiv., 2.5 mmol, 320 mg) and 1,3-enyne (1.0 equiv., 2 mmol) were added to the Schlenk tube. The resulting mixture was allowed to stir at 22 °C for 15 h. The mixture was concentrated *in vacuo*,

affording yellow oil residue, which was purified by silica gel chromatography (100:1 hexanes/ethyl acetate) to afford allenylboronate **1** as colorless oil. Rapid silica gel chromatography (10 min) is imperative for reproducible results because the allenylboronates decompose readily on silica gel.

**General procedure for the synthesis of 4,4,5,5-tetramethyl-2-(3-phenylprop-2-yn-1-yl)-1,3,2-dioxaborolane (10b).**

Compound **10b** was synthesized according to previously reported procedure<sup>[3]</sup>. Dry THF (20 mL, 0.5 M) and ethynylbenzene (1.0 equiv., 10 mmol, 1.02 g) were added to a nitrogen purged round bottom flask. The reaction was cooled to -78 °C before the dropwise addition of n-butyllithium (1.1 equiv., 11 mmol, 6.9 mL, 1.6 M in hexane) over a period of 5 minutes. After stirring for 1 hour, 2-(iodomethyl)-4,4,5,5-tetramethyl-1,3,2-dioxaborolane (CAS:70557-99-2, 1.0 equiv., 10 mmol, 2.68 g) was added dropwise. The reaction was kept cold for 6 hours before warming up to room temperature overnight. Once complete, the reaction was quenched with water and EtOAc. After separating the layers, the aqueous layer was washed with EtOAc (3 x 15 mL) collecting the organic layer each time. The organic layer was then washed with brine, dried over Na<sub>2</sub>SO<sub>4</sub>, filtered, and concentrated in vacuo. The resulting yellow oil was then carried forward crude in the borylation reaction.

**General procedure for the synthesis of *N*'-Aryl pyrazoles from the corresponding aryl diazonium salts and allenylboronates.**

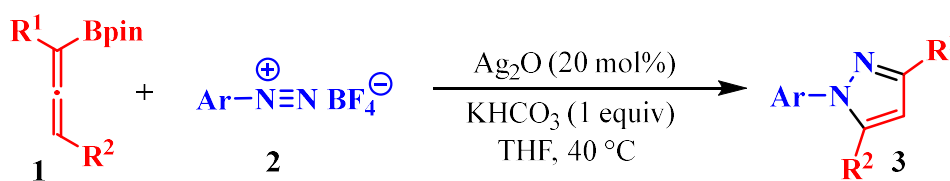

An oven-dried Schlenk tube equipped with a magnetic stir bar was charged with aryl diazonium salts **2** (0.4 mmol), Ag<sub>2</sub>O (20 mol%, 9.2 mg, 0.04 mmol), KHCO<sub>3</sub> (1.0 equiv., 20 mg, 0.2 mmol), then THF (1 mL) was added. After that, allenylboronate **1** (1.0 equiv., 20 mg, 0.2 mmol) was added in 1 mL of THF slowly in 3 minutes. The resulting mixture was allowed to stir at 40 °C in Argon atmosphere for 0.3 – 10 hours. Then the mixture was quenched with sat. NH<sub>4</sub>Cl (aq.), filtered through a Celite plug, and rinsed with ethyl acetate. The resulting clear organic solution was concentrated under reduced pressure, and the residue was further purified by a silica gel column chromatography to yield the corresponding *N*'-Aryl pyrazoles **3**.



## Reaction Optimization

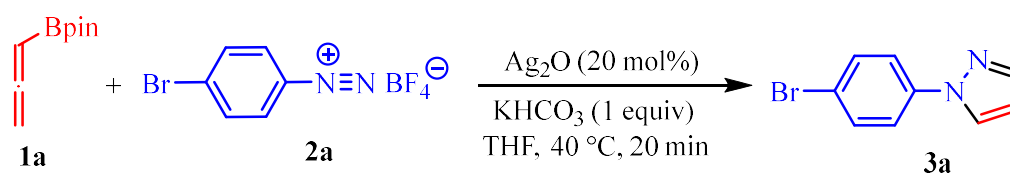

Table S1

| Entry <sup>[a]</sup> | Variation from the standard conditions                          | Yield <sup>[b]</sup> |
|----------------------|-----------------------------------------------------------------|----------------------|
| 1                    | none                                                            | 86                   |
| 2                    | $\text{Ag}_2\text{CO}_3$ instead of $\text{Ag}_2\text{O}$       | 56                   |
| 3                    | $\text{AgOAc}$ instead of $\text{Ag}_2\text{O}$                 | 64                   |
| 4                    | $\text{AgF}$ instead of $\text{Ag}_2\text{O}$                   | 41                   |
| 5                    | $\text{AgPF}_6$ instead of $\text{Ag}_2\text{O}$                | 14                   |
| 6                    | $\text{PPh}_3\text{AuOTf}$ instead of $\text{Ag}_2\text{O}$     | trace                |
| 7                    | $\text{Cu}(\text{OTf})_2$ instead of $\text{Ag}_2\text{O}$      | nd                   |
| 8                    | $\text{PdCl}_2(\text{MeCN})_2$ instead of $\text{Ag}_2\text{O}$ | trace                |
| 9                    | $\text{Zn}(\text{OAc})_2$ instead of $\text{Ag}_2\text{O}$      | nd                   |
| 10                   | 10 mol% of $\text{Ag}_2\text{O}$ was employed                   | 69                   |
| 11                   | 50 mol% of $\text{Ag}_2\text{O}$ was employed                   | 78                   |
| 12                   | $\text{K}_2\text{CO}_3$ instead of $\text{KHCO}_3$              | 55                   |
| 13                   | $\text{KOAc}$ instead of $\text{KHCO}_3$                        | 68                   |
| 14                   | $\text{NaHCO}_3$ instead of $\text{KHCO}_3$                     | 63                   |
| 15                   | MTBE instead of THF                                             | 6                    |
| 16                   | DMF instead of THF                                              | 58                   |
| 17                   | MeCN instead of THF                                             | nd                   |
| 18                   | 1,4-dioxane instead of THF                                      | 27                   |
| 19                   | 25 °C instead of 40 °C                                          | 43                   |
| 20                   | <b>1a</b> was added in one portion                              | 50                   |

[a] General reaction procedure: To a mixture of phenyl diazonium salt **2a** (81 mg, 0.3 mmol), catalyst (0.04 mmol), and base (0.2 mmol) in 1 mL of solvent was added the allenyl boronate **1a** (33 mg, 0.2 mmol) in 1 mL of solvent slowly in 3 minutes, and the mixture reacted at 40 °C for 20 minutes unless otherwise noted. [b] Yield of isolated pyrazole **3a**. **Safety note:** Handling of aryl diazonium salts should be done in a well-ventilated fume cupboard.

## Characterization Data

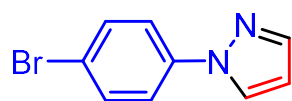

**3a**

**1-(4-bromophenyl)-1H-pyrazole (3a).**<sup>[4a]</sup> For 0.2 mmol scales, the standard procedure was followed to provide **3a** by column chromatography on silica gel (petroleum ether/EtOAc, 25:1, v/v) as orange solid (38 mg, 86%). Reaction time for this compound is 20 min. M.p.: 69-70 °C. <sup>1</sup>H NMR (600 MHz, Chloroform-*d*) δ 7.89 (s, 1H), 7.72 (s, 1H), 7.65 – 7.53 (m, 4H), 6.47 (s, 1H). <sup>13</sup>C NMR (151 MHz, Chloroform-*d*) δ 141.5, 139.3, 132.6, 126.7, 120.7, 119.7, 108.1. HRMS (ESI-TOF): calcd. for C<sub>9</sub>H<sub>8</sub>BrN<sub>2</sub> (M+H): 222.9871, found: *m/z* 222.9871.

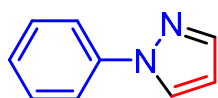

**3b**

**1-phenyl-1H-pyrazole (3b).**<sup>[4a]</sup> For 0.2 mmol scales, the standard procedure was followed to provide **3b** by column chromatography on silica gel (petroleum ether/EtOAc, 50:1, v/v) as red oil (15 mg, 52%). Reaction time for this compound is 1 h. <sup>1</sup>H NMR (600 MHz, Chloroform-*d*) δ 7.94 – 7.84 (m, 1H), 7.73 (s, 1H), 7.69 (d, *J* = 8.1 Hz, 2H), 7.42 (q, *J* = 7.6 Hz, 2H), 7.25 (q, *J* = 7.2 Hz, 1H), 6.43 (s, 1H). <sup>13</sup>C NMR (151 MHz, Chloroform-*d*) δ 141.2, 140.3, 129.5, 126.9, 126.5, 119.3, 107.7. HRMS (ESI-TOF): calcd. for C<sub>9</sub>H<sub>9</sub>N<sub>2</sub> (M+H): 145.0766, found: *m/z* 145.0768.

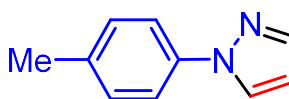

**3c**

**1-(*p*-tolyl)-1H-pyrazole (3c).**<sup>[4a]</sup> For 0.2 mmol scales, the standard procedure was followed to provide **3c** by column chromatography on silica gel (petroleum ether/EtOAc, 25:1, v/v) as red oil (22 mg, 69%). Reaction time for this compound is 1 h. <sup>1</sup>H NMR (600 MHz, Chloroform-*d*) δ 7.89 (d, *J* = 6.0 Hz, 1H), 7.72 (d, *J* = 8.2 Hz, 1H), 7.58 (d, *J* = 8.4 Hz, 2H), 7.26 (d, *J* = 10.2 Hz, 2H), 6.47 (s, 1H), 2.39 (s, 3H). <sup>13</sup>C NMR (151 MHz, Chloroform-*d*) δ 140.9, 138.1, 136.4, 130.0, 126.8, 119.3, 21.0. HRMS (ESI-TOF): calcd. for C<sub>10</sub>H<sub>11</sub>N<sub>2</sub> (M+H): 159.0922, found: *m/z* 159.0920.

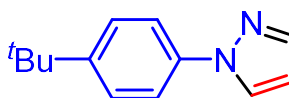

**3d**

**1-[4-(*tert*-butyl)phenyl]-1H-pyrazole (3d).**<sup>[4a]</sup> For 0.2 mmol scales, the standard procedure was followed to provide **3d** by column chromatography on silica gel (petroleum ether/EtOAc, 25:1, v/v) as red oil (24 mg, 60%). Reaction time for this compound is 4 h. <sup>1</sup>H NMR (400 MHz, Chloroform-*d*) δ 7.89 (d, *J* = 2.5 Hz, 1H), 7.72 (s, 1H), 7.61 (d, *J* = 8.7 Hz, 2H), 7.47 (d, *J* = 8.8 Hz, 2H), 6.45 (s, 1H), 1.35 (s, 9H). <sup>13</sup>C NMR (101 MHz, Chloroform-*d*) δ 149.6, 140.8, 137.8, 126.7, 126.3, 119.0, 107.3, 34.5, 31.4. HRMS (ESI-TOF): calcd. for C<sub>13</sub>H<sub>17</sub>N<sub>2</sub> (M+H): 201.1392, found: *m/z* 201.1391.

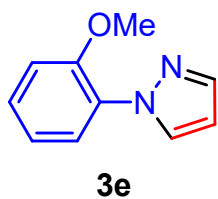

**1-(2-methoxyphenyl)-1H-pyrazole (3e).**<sup>[4b]</sup> For 0.2 mmol scales, the standard procedure was followed to provide **3e** by column chromatography on silica gel (petroleum ether/EtOAc, 15:1, v/v) as red oil (22 mg, 61%). Reaction time for this compound is 4 h. <sup>1</sup>H NMR (600 MHz, Chloroform-*d*) δ 8.03 (s, 1H), 7.72 (d, *J* = 7.8 Hz, 2H), 7.30 (t, *J* = 7.9 Hz, 1H), 7.05 (q, *J* = 7.9 Hz, 2H), 6.43 (s, 1H), 3.87 (s, 3H). <sup>13</sup>C NMR (151 MHz, Chloroform-*d*) δ 151.4, 140.2, 131.7, 129.8, 128.1, 125.4, 121.3, 112.3, 106.3, 56.0. HRMS (ESI-TOF): calcd. for C<sub>10</sub>H<sub>11</sub>N<sub>2</sub>O (M+H): 175.0871, found: *m/z* 175.0871.

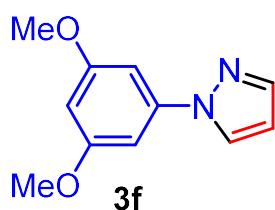

**1-(3,5-dimethoxyphenyl)-1H-pyrazole (3f).**<sup>[4c]</sup> For 0.2 mmol scales, the standard procedure was followed to provide **3f** by column chromatography on silica gel (petroleum ether/EtOAc, 10:1, v/v) as red oil (24 mg, 56%). Reaction time for this compound is 4 h. <sup>1</sup>H NMR (600 MHz, Chloroform-*d*) δ 7.89 (s, 1H), 7.71 (s, 1H), 6.87 (s, 2H), 6.45 (s, 1H), 6.39 (s, 1H), 3.85 (s, 6H). <sup>13</sup>C NMR (151 MHz, Chloroform-*d*) δ 161.5, 141.9, 141.1, 127.1, 107.7, 98.6, 97.8, 55.7. HRMS (ESI-TOF): calcd. for C<sub>11</sub>H<sub>13</sub>N<sub>2</sub>O<sub>2</sub> (M+H): 205.0977, found: *m/z* 205.0973.

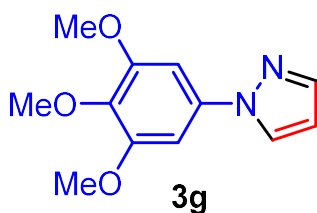

**1-(3,4,5-trimethoxyphenyl)-1H-pyrazole (3g).** For 0.2 mmol scales, the standard procedure was followed to provide **3g** by column chromatography on silica gel (petroleum ether/EtOAc, 10:1, v/v) as an orange solid (32 mg, 67%). M.p.: 61-62 °C. Reaction time for this compound is 4 h. <sup>1</sup>H NMR (600 MHz, Chloroform-*d*) δ 7.87 (d, *J* = 1.7 Hz, 1H), 7.71 (d, *J* = 1.4 Hz, 1H), 6.90 (s, 2H), 6.55 – 6.39 (m, 1H), 3.92 (s, 6H), 3.86 (s, 3H). <sup>13</sup>C NMR (151 MHz, Chloroform-*d*) δ 153.8, 141.0, 136.7, 136.5, 127.1, 107.7, 97.3, 61.2, 56.4. HRMS (ESI-TOF): calcd. for C<sub>12</sub>H<sub>15</sub>N<sub>2</sub>O<sub>3</sub> (M+H): 235.1083, found: *m/z* 235.1083.

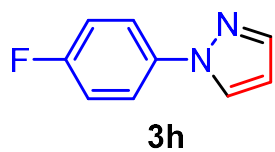

**1-(4-fluorophenyl)-1H-pyrazole (3h).**<sup>[4a]</sup> For 0.2 mmol scales, the standard procedure was followed to provide **3h** by column chromatography on silica gel (petroleum ether/EtOAc, 25:1, v/v) as red oil (27 mg, 84%). Reaction time for this compound is 3 h. <sup>1</sup>H NMR (600 MHz, Chloroform-*d*) δ 7.85 (d, *J* = 2.4 Hz, 1H), 7.70 (d, *J* = 1.9 Hz, 1H), 7.67 – 7.61 (m, 2H), 7.17 – 7.09 (m, 2H), 6.46 (t, *J* = 2.1 Hz, 1H). <sup>19</sup>F NMR (565 MHz, Chloroform-*d*) δ -115.90. <sup>13</sup>C NMR (151 MHz, Chloroform-*d*) δ 161.2 (d, *J* = 245.8 Hz), 141.2, 136.7, 127.0, 121.1 (d, *J* = 8.2 Hz), 116.3 (d, *J* = 22.9 Hz), 107.8. HRMS (ESI-TOF): calcd. for C<sub>9</sub>H<sub>9</sub>N<sub>2</sub>F (M+H): 163.0672, found: *m/z* 163.0664.

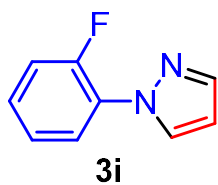

**1-(2-fluorophenyl)-1H-pyrazole (3i).**<sup>[4d]</sup> For 0.2 mmol scales, the standard procedure was followed to provide **3i** by column chromatography on silica gel (petroleum ether/EtOAc, 25:1, v/v) as red oil (22 mg, 67%). Reaction time for this compound is 3 h. <sup>1</sup>H NMR (400 MHz, Chloroform-*d*)  $\delta$  8.00 (d,  $J$  = 2.9 Hz, 1H), 7.93 – 7.83 (m, 1H), 7.73 (s, 1H), 7.28 – 7.21 (m, 3H), 6.47 (s, 1H). <sup>19</sup>F NMR (376 MHz, Chloroform-*d*)  $\delta$  -125.05. <sup>13</sup>C NMR (101 MHz, Chloroform-*d*)  $\delta$  153.6 (d,  $J$  = 248.5 Hz), 140.9, 130.9 (d,  $J$  = 10.5 Hz), 128.5 (d,  $J$  = 9.4 Hz), 127.8 (d,  $J$  = 7.9 Hz), 125.0 (d,  $J$  = 3.8 Hz), 124.5, 116.9 (d,  $J$  = 20.6 Hz), 107.6. HRMS (ESI-TOF): calcd. for C<sub>9</sub>H<sub>9</sub>N<sub>2</sub>F (M+H): 163.0672, found:  $m/z$  163.0672.

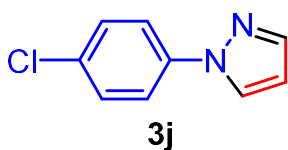

**1-(4-chlorophenyl)-1H-pyrazole (3j).**<sup>[4a]</sup> For 0.2 mmol scales, the standard procedure was followed to provide **3j** by column chromatography on silica gel (petroleum ether/EtOAc, 10:1, v/v) as yellow solid (0.2 mmol, 33 mg, 92%). This compound was also prepared on a 10 mmol scale, and 1.32 g of **3j** was obtained in 74% yield. M.p.: 53-54 °C. Reaction time for this compound is 2 h. <sup>1</sup>H NMR (600 MHz, Chloroform-*d*)  $\delta$  7.89 (d,  $J$  = 2.5 Hz, 1H), 7.72 (s, 1H), 7.63 (d,  $J$  = 8.8 Hz, 2H), 7.41 (d,  $J$  = 8.8 Hz, 2H), 6.47 (s, 1H). <sup>13</sup>C NMR (151 MHz, Chloroform-*d*)  $\delta$  141.5, 138.8, 132.0, 129.6, 126.8, 120.4, 108.1. HRMS (ESI-TOF): calcd. for C<sub>9</sub>H<sub>9</sub>N<sub>2</sub>Cl (M+H): 179.0376, found:  $m/z$  179.0375.

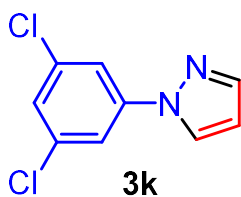

**1-(3,5-dichlorophenyl)-1H-pyrazole (3k).** For 0.2 mmol scales, the standard procedure was followed to provide **3k** by column chromatography on silica gel (petroleum ether/EtOAc, 25:1, v/v) as red solid (33 mg, 78%). M.p.: 60-61 °C. Reaction time for this compound is 2 h. <sup>1</sup>H NMR (600 MHz, Chloroform-*d*)  $\delta$  7.89 (s, 1H), 7.73 (s, 1H), 7.63 (s, 2H), 7.25 (d,  $J$  = 1.8 Hz, 1H), 6.49 (s, 1H). <sup>13</sup>C NMR (151 MHz, Chloroform-*d*)  $\delta$  142.1, 141.6, 135.9, 126.9, 126.3, 117.5, 108.7. HRMS (ESI-TOF): calcd. for C<sub>9</sub>H<sub>8</sub>N<sub>2</sub>Cl<sub>2</sub> (M+H): 212.9986, found:  $m/z$  212.9984.

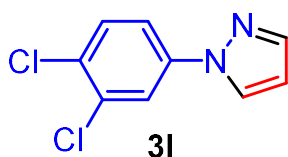

**1-(3,4-dichlorophenyl)-1H-pyrazole (3l).**<sup>[4a]</sup> For 0.2 mmol scales, the standard procedure was followed to provide **3l** by column chromatography on silica gel (petroleum ether/EtOAc, 25:1, v/v) as yellow solid (37 mg, 88%). M.p.: 76-77 °C. Reaction time for this compound is 2 h. <sup>1</sup>H NMR (600 MHz, Chloroform-*d*)  $\delta$  7.88 (d,  $J$  = 1.9 Hz, 1H), 7.85 (d,  $J$  = 2.4 Hz, 1H), 7.73 (d,  $J$  = 1.8 Hz, 1H), 7.54 (dd,  $J$  = 8.7, 2.5 Hz, 1H), 7.50 (d,  $J$  = 8.7 Hz, 1H), 6.49 (dd,  $J$  = 2.6, 1.7 Hz, 1H). <sup>13</sup>C NMR (151 MHz, Chloroform-*d*)  $\delta$  141.9, 139.4, 133.6, 131.1, 130.1, 126.8, 121.0, 118.1, 108.5. HRMS (ESI-TOF): calcd. for C<sub>9</sub>H<sub>8</sub>N<sub>2</sub>Cl<sub>2</sub> (M+H): 212.9986, found:  $m/z$  212.9987.

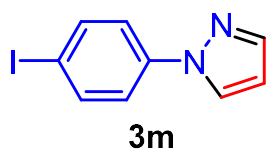

**1-(4-iodophenyl)-1H-pyrazole (3m).**<sup>[4e]</sup> For 0.2 mmol scales, the standard procedure was followed to provide **3m** by column chromatography on silica gel (petroleum ether/EtOAc, 25:1, v/v) as red solid (44 mg, 81%). M.p.: 85-86 °C. Reaction time for this compound is 2 h. <sup>1</sup>H NMR (400 MHz, Chloroform-*d*) δ 7.90 (d, *J* = 2.5 Hz, 1H), 7.76 (d, *J* = 8.2 Hz, 2H), 7.73 (s, 1H), 7.46 (d, *J* = 8.1 Hz, 2H), 6.48 (t, *J* = 2.0 Hz, 1H). <sup>13</sup>C NMR (101 MHz, Chloroform-*d*) δ 141.6, 140.0, 138.5, 126.7, 120.9, 108.2, 90.6. **HRMS (ESI-TOF):** calcd. for C<sub>9</sub>H<sub>9</sub>N<sub>2</sub>I (M+H): 270.9732, found: *m/z* 270.9736.

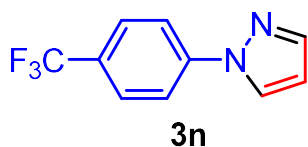

**1-[4-(trifluoromethyl)phenyl]-1H-pyrazole (3n).**<sup>[4a]</sup> For 0.2 mmol scales, the standard procedure was followed to provide **3n** by column chromatography on silica gel (petroleum ether/EtOAc, 10:1, v/v) as white solid (40 mg, 93%). M.p.: 92-93 °C. Reaction time for this compound is 2 h. <sup>1</sup>H NMR (600 MHz, Chloroform-*d*) δ 7.99 (d, *J* = 2.5 Hz, 1H), 7.83 (d, *J* = 8.0 Hz, 2H), 7.77 (d, *J* = 1.7 Hz, 1H), 7.72 (d, *J* = 8.5 Hz, 2H), 6.52 (dd, *J* = 2.6, 1.7 Hz, 1H). <sup>19</sup>F NMR (565 MHz, Chloroform-*d*) δ -62.11. <sup>13</sup>C NMR (151 MHz, Chloroform-*d*) δ 142.6, 142.1, 128.3 (q, *J* = 33.3 Hz), 126.9, 124.0 (q, *J* = 271.8 Hz), 118.9, 108.6. **HRMS (ESI-TOF):** calcd. for C<sub>10</sub>H<sub>9</sub>N<sub>2</sub>F<sub>3</sub> (M+H): 213.0640, found: *m/z* 213.0636.

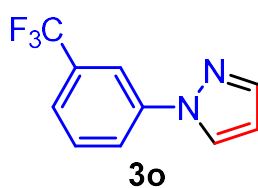

**1-[3-(trifluoromethyl)phenyl]-1H-pyrazole (3o).** For 0.2 mmol scales, the standard procedure was followed to provide **3o** by column chromatography on silica gel (petroleum ether/EtOAc, 25:1, v/v) as red oil (36 mg, 84%). Reaction time for this compound is 4 h. <sup>1</sup>H NMR (600 MHz, Chloroform-*d*) δ 7.99 (s, 1H), 7.96 (s, 1H), 7.87 (d, *J* = 7.9 Hz, 1H), 7.74 (s, 1H), 7.56 (t, *J* = 7.9 Hz, 1H), 7.52 (d, *J* = 7.9 Hz, 1H), 6.50 (t, *J* = 2.1 Hz, 1H). <sup>19</sup>F NMR (565 MHz, Chloroform-*d*) δ -62.68. <sup>13</sup>C NMR (151 MHz, Chloroform-*d*) δ 141.8, 140.6, 132.1 (q, *J* = 32.9 Hz), 130.2, 126.9, 123.8 (q, *J* = 272.4 Hz), 123.0 (q, *J* = 3.8 Hz), 122.0, 116.1 (q, *J* = 3.8 Hz), 108.5. **HRMS (ESI-TOF):** calcd. for C<sub>10</sub>H<sub>9</sub>N<sub>2</sub>F<sub>3</sub> (M+H): 213.0640, found: *m/z* 213.0639.

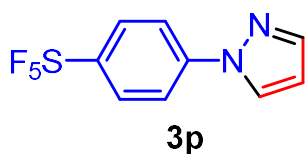

**1-[4-(pentafluoro-λ<sup>6</sup>-sulfanyl)phenyl]-1H-pyrazole (3p).**<sup>[4f]</sup> For 0.2 mmol scales, the standard procedure was followed to provide **3p** by column chromatography on silica gel (petroleum ether/EtOAc, 50:1, v/v) as yellow solid (40 mg, 74%). M.p.: 77-78 °C. Reaction time for this compound is 4 h. <sup>1</sup>H NMR (600 MHz, Chloroform-*d*) δ 7.97 (d, *J* = 2.6 Hz, 2H), 7.83 (d, *J* = 9.0 Hz, 2H), 7.78 (d, *J* = 8.9 Hz, 3H), 7.76 (s, 1H), 6.56 – 6.48 (m, 1H). <sup>19</sup>F NMR (376 MHz, Chloroform-*d*) δ 84.43 (p, *J* = 150.2 Hz), 63.51 (d, *J* = 149.4 Hz). <sup>13</sup>C NMR (151 MHz, Chloroform-*d*) δ 151.3 (p, *J* = 18.0 Hz), 142.3, 142.0, 127.6 (p, *J* = 4.8 Hz), 126.9, 118.4, 108.9. **HRMS (ESI-TOF):** calcd. for C<sub>9</sub>H<sub>8</sub>N<sub>2</sub>SF<sub>5</sub> (M+H): 271.0328, found: *m/z* 271.0327.

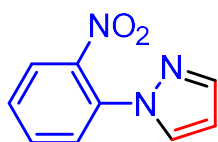**3q**

**1-(2-nitrophenyl)-1H-pyrazole (3q).**<sup>[4g]</sup> For 0.2 mmol scales, the standard procedure was followed to provide **3q** by column chromatography on silica gel (petroleum ether/EtOAc, 5:1, v/v) as yellow solid (34 mg, 90%). M.p.: 87-88 °C. Reaction time for this compound is 3 h. <sup>1</sup>H NMR (600 MHz, Chloroform-*d*) δ 7.87 (dd, *J* = 8.1, 1.4 Hz, 1H), 7.74 (dd, *J* = 11.6, 2.1 Hz, 2H), 7.68 (td, *J* = 7.8, 1.5 Hz, 1H), 7.58 (dd, *J* = 8.0, 1.3 Hz, 1H), 7.52 (td, *J* = 7.8, 1.3 Hz, 1H), 6.50 (dd, *J* = 2.5, 1.8 Hz, 1H). <sup>13</sup>C NMR (151 MHz, Chloroform-*d*) δ 144.7, 142.5, 133.6, 133.1, 129.8, 128.5, 126.3, 125.2, 108.3. HRMS (ESI-TOF): calcd. for C<sub>9</sub>H<sub>8</sub>N<sub>3</sub>O<sub>2</sub> (M+H): 190.0617, found: *m/z* 190.0615.

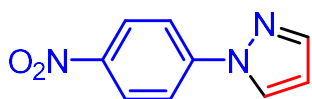**3r**

**1-(4-nitrophenyl)-1H-pyrazole (3r).**<sup>[4h]</sup> The standard procedure was followed to provide **3r** by column chromatography on silica gel (petroleum ether/EtOAc, 5:1, v/v) as white solid (0.2 mmol, 36 mg, 95%). This compound was also prepared on a 10 mmol scale, and 2.65 g of **3r** was obtained in 87% yield. M.p.: 169-170 °C. Reaction time for this compound is 2 h. <sup>1</sup>H NMR (400 MHz, Chloroform-*d*) δ 8.33 (dd, *J* = 9.9, 2.0 Hz, 2H), 8.03 (d, *J* = 2.5 Hz, 1H), 7.88 (dd, *J* = 9.1, 2.5 Hz, 2H), 7.79 (s, 1H), 6.55 (t, *J* = 2.2 Hz, 1H). <sup>13</sup>C NMR (101 MHz, Chloroform-*d*) δ 144.5, 142.9, 127.2, 126.8, 125.5, 118.7, 109.5. HRMS (ESI-TOF): calcd. for C<sub>9</sub>H<sub>8</sub>N<sub>3</sub>O<sub>2</sub> (M+H): 190.0617, found: *m/z* 190.0610.

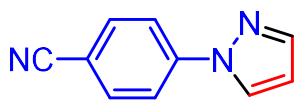**3s**

**4-(1H-pyrazol-1-yl)benzotrile (3s).**<sup>[4h]</sup> For 0.2 mmol scales, the standard procedure was followed to provide **3s** by column chromatography on silica gel (petroleum ether/EtOAc, 25:1, v/v) as white solid (30 mg, 91%). M.p.: 88-89 °C. Reaction time for this compound is 2 h. <sup>1</sup>H NMR (600 MHz, Chloroform-*d*) δ 7.98 (s, 1H), 7.83 (d, *J* = 7.2 Hz, 2H), 7.79 – 7.69 (m, 3H), 6.59 – 6.47 (m, 1H). <sup>13</sup>C NMR (151 MHz, Chloroform-*d*) δ 143.1, 142.6, 133.8, 126.9, 119.1, 118.5, 109.7, 109.2. HRMS (ESI-TOF): calcd. for C<sub>10</sub>H<sub>8</sub>N<sub>3</sub> (M+H): 170.0718, found: *m/z* 170.0715.

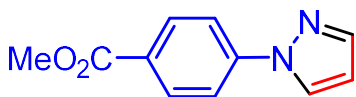**3t**

**methyl 4-(1H-pyrazol-1-yl)benzoate (3t).**<sup>[4h]</sup> For 0.2 mmol scales, the standard procedure was followed to provide **3t** by column chromatography on silica gel (petroleum ether/EtOAc, 5:1, v/v) as red solid (38 mg, 94%). M.p.: 114-115 °C. Reaction time for this compound is 3 h. <sup>1</sup>H NMR (600 MHz, Chloroform-*d*) δ 8.11 (d, *J* = 8.7 Hz, 2H), 7.99 (d, *J* = 2.6 Hz, 1H), 7.90 – 7.65 (m, 3H), 6.49 (t, *J* = 2.1 Hz, 1H), 3.91 (s, 3H). <sup>13</sup>C NMR (151 MHz, Chloroform-*d*) δ 166.5, 143.4, 142.0, 131.3, 127.8, 127.0, 118.4, 108.6, 52.3. HRMS (ESI-TOF): calcd. for C<sub>11</sub>H<sub>11</sub>N<sub>2</sub>O<sub>2</sub> (M+H): 203.0821, found: *m/z* 203.0817.



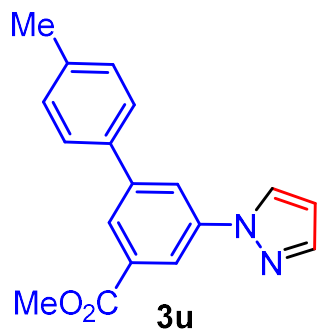

**methyl 4'-methyl-5-(1*H*-pyrazol-1-yl)-[1,1'-biphenyl]-3-carboxylate (3u).** For 0.2 mmol scales, the standard procedure was followed to provide **3u** by column chromatography on silica gel (petroleum ether/EtOAc, 5:1, v/v) as yellow oil (45 mg, 76%). Reaction time for this compound is 4 h.  $^1\text{H NMR}$  (600 MHz, Chloroform-*d*)  $\delta$  8.24 (t,  $J = 1.8$  Hz, 1H), 8.18 (dt,  $J = 7.6, 1.8$  Hz, 2H), 8.04 (d,  $J = 2.5$  Hz, 1H), 7.77 (d,  $J = 1.8$  Hz, 1H), 7.58 (d,  $J = 8.1$  Hz, 2H), 7.28 (d,  $J = 7.8$  Hz, 2H), 6.51 (t,  $J = 2.2$  Hz, 1H), 3.97 (s, 3H), 2.41 (s, 3H).  $^{13}\text{C NMR}$  (151 MHz, Chloroform-*d*)  $\delta$  166.5, 143.1, 141.6, 140.8, 138.3, 136.4, 131.9, 129.8, 127.1, 127.1, 125.9, 122.0, 118.1, 108.2, 52.6, 21.3. **HRMS (ESI-TOF):** calcd. for  $\text{C}_{18}\text{H}_{17}\text{N}_2\text{O}_2$  (M+H): 293.1290, found:  $m/z$  293.1286.

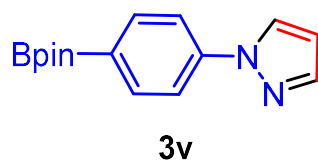

**1-[4-(4,4,5,5-tetramethyl-1,3,2-dioxaborolan-2-yl)phenyl]-1*H*-pyrazole (3v).**<sup>[4i]</sup> For 0.2 mmol scales, the standard procedure was followed to provide **3v** by column chromatography on silica gel (petroleum ether/EtOAc, 20:1, v/v) as white solid (25 mg, 47%). M.p.: 76-77 °C. Reaction time for this compound is 4 h.  $^1\text{H NMR}$  (600 MHz, Chloroform-*d*)  $\delta$  7.98 (d,  $J = 2.5$  Hz, 1H), 7.89 (d,  $J = 8.5$  Hz, 2H), 7.74 (d,  $J = 1.7$  Hz, 1H), 7.72 (s, 1H), 7.71 (s, 1H), 6.54 – 6.44 (m, 1H), 1.36 (s, 12H).  $^{13}\text{C NMR}$  (151 MHz, Chloroform-*d*)  $\delta$  142.3, 141.5, 136.2, 126.8, 118.1, 108.0, 84.1, 25.0. **HRMS (ESI-TOF):** calcd. for  $\text{C}_{15}\text{H}_{20}\text{N}_2\text{O}_2\text{B}$  (M+H): 271.1618, found:  $m/z$  271.1622.

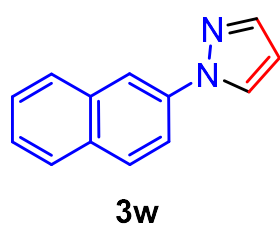

**1-(naphthalen-2-yl)-1*H*-pyrazole (3w).**<sup>[4a]</sup> For 0.2 mmol scales, the standard procedure was followed to provide **3w** by column chromatography on silica gel (petroleum ether/EtOAc, 15:1, v/v) as grey solid (17 mg, 43%). M.p.: 83-84 °C. Reaction time for this compound is 4 h.  $^1\text{H NMR}$  (600 MHz, Chloroform-*d*)  $\delta$  8.12 (d,  $J = 2.2$  Hz, 1H), 8.07 (d,  $J = 2.8$  Hz, 1H), 7.95 (d,  $J = 8.8$  Hz, 1H), 7.92 – 7.84 (m, 3H), 7.79 (d,  $J = 1.7$  Hz, 1H), 7.57 – 7.51 (m, 1H), 7.51 – 7.46 (m, 1H), 6.60 – 6.46 (m, 1H).  $^{13}\text{C NMR}$  (101 MHz, Chloroform-*d*)  $\delta$  141.4, 137.7, 133.7, 132.0, 129.6, 128.1, 127.9, 127.1, 126.0, 118.7, 116.5, 107.9. **HRMS (ESI-TOF):** calcd. for  $\text{C}_{13}\text{H}_{11}\text{N}_2$  (M+H): 195.0922, found:  $m/z$  195.0924.

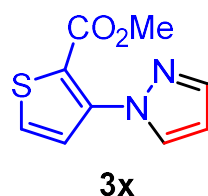

**methyl 3-(1*H*-pyrazol-1-yl)thiophene-2-carboxylate (3x).** For 0.2 mmol scales, the standard procedure (1.0 equiv.  $\text{K}_2\text{CO}_3$  instead of  $\text{KHCO}_3$ ) was followed to provide **3x** by column chromatography on silica gel (petroleum ether/EtOAc, 10:1, v/v) as red solid (25.2 mg, 60%). M.p.: 40-41 °C. Reaction time for this compound is 4 h.  $^1\text{H NMR}$  (600 MHz, Chloroform-*d*)  $\delta$  8.27 (s, 1H), 7.71 (s, 1H), 7.53 (dd,  $J = 5.4, 1.3$  Hz, 1H), 7.45 (dd,  $J = 5.3, 1.3$  Hz, 1H), 6.43 (s, 1H), 3.85 (d,  $J = 1.3$  Hz, 3H).  $^{13}\text{C NMR}$  (151 MHz, Chloroform-*d*)  $\delta$  161.4, 143.0, 141.3, 132.7, 130.6, 126.9, 119.0, 106.7, 52.4. **HRMS (ESI-TOF):** calcd. for  $\text{C}_9\text{H}_9\text{N}_2\text{O}_2\text{S}$  (M+H): 209.0385, found:  $m/z$  209.0384.

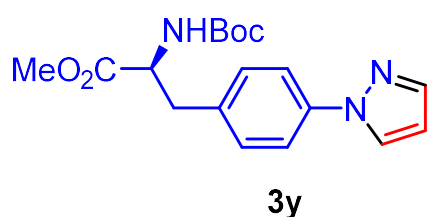

**methyl (S)-3-[4-(1H-pyrazol-1-yl)phenyl]-2-[(tert-butoxycarbonyl)amino]propanoate (3y).**

For 0.2 mmol scales, the standard procedure was followed to provide **3y** by column chromatography on silica gel (petroleum ether/EtOAc, 2:1, v/v) as white solid (47 mg, 67%). M.p.: 112-113 °C.

Reaction time for this compound is 6 h. <sup>1</sup>H NMR (600 MHz, Chloroform-*d*) δ 7.90 (d, *J* = 2.8 Hz, 1H), 7.71 (s, 1H), 7.62 (d, *J* = 8.5 Hz, 2H), 7.21 (d, *J* = 8.8 Hz, 2H), 6.53 – 6.41 (m, 1H), 5.01 (d, *J* = 8.2 Hz, 1H), 4.60 (q, *J* = 7.7, 7.1 Hz, 1H), 3.72 (s, 3H), 3.12 (ddd, *J* = 45.1, 13.8, 5.9 Hz, 2H), 1.42 (s, 9H). <sup>13</sup>C NMR (151 MHz, Chloroform-*d*) δ 172.3, 155.2, 141.2, 139.3, 134.4, 130.4, 126.8, 119.4, 107.7, 80.2, 54.5, 52.4, 37.9, 28.4. HRMS (ESI-TOF): calcd. for C<sub>18</sub>H<sub>23</sub>N<sub>3</sub>O<sub>4</sub>Na (M+Na): 368.1586, found: *m/z* 368.1581.

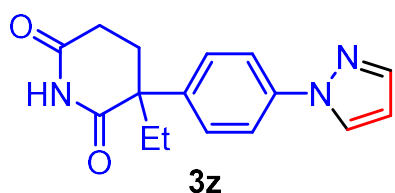

**3-[4-(1H-pyrazol-1-yl)phenyl]-3-ethylpiperidine-2,6-dione (3z).**

For 0.2 mmol scales, the standard procedure was followed to provide **3z** by column chromatography on silica gel (petroleum ether/EtOAc, 2:1, v/v) as red solid (35 mg, 62%). M.p.: 136-137 °C.

Reaction time for this compound is 6 h. <sup>1</sup>H NMR (600 MHz, Chloroform-*d*) δ 8.06 (s, 1H), 7.92 (d, *J* = 2.5 Hz, 1H), 7.73 (s, 1H), 7.70 (d, *J* = 8.6 Hz, 2H), 7.37 (d, *J* = 8.5 Hz, 2H), 6.47 (s, 1H), 2.63 (dd, *J* = 18.5, 4.3 Hz, 1H), 2.43 (ddd, *J* = 18.3, 13.5, 4.1 Hz, 2H), 2.26 (td, *J* = 14.1, 13.6, 4.4 Hz, 1H), 2.07 (dq, *J* = 14.7, 7.4 Hz, 1H), 1.95 (dq, *J* = 14.6, 7.4 Hz, 1H), 0.89 (t, *J* = 7.4 Hz, 3H). <sup>13</sup>C NMR (151 MHz, Chloroform-*d*) δ 175.0, 172.1, 141.5, 139.6, 136.9, 127.5, 126.8, 119.7, 108.0, 50.9, 33.0, 29.3, 27.1, 9.1. HRMS (ESI-TOF): calcd. for C<sub>16</sub>H<sub>18</sub>N<sub>3</sub>O<sub>2</sub> (M+H): 284.1399, found: *m/z* 284.1397.

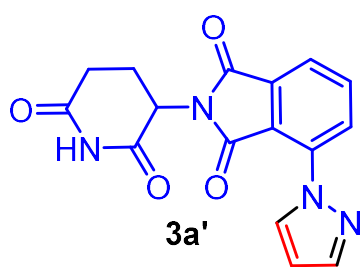

**2-(2,6-dioxopiperidin-3-yl)-4-(1H-pyrazol-1-yl)isoindoline-1,3-dione (3a').**

For 0.2 mmol scales, the standard procedure was followed to provide **3a'** by column chromatography on silica gel (petroleum ether/EtOAc, 1:1, v/v) as yellow solid (29 mg, 44%).

M.p.: 220-221 °C. Reaction time for this compound is 8 h. <sup>1</sup>H NMR (600 MHz, DMSO-*d*<sub>6</sub>) δ 11.16 (s, 1H), 8.58 (d, *J* = 2.6 Hz, 1H), 8.19 (d, *J* = 8.3 Hz, 1H), 8.00 (t, *J* = 7.8 Hz, 1H), 7.92 (d, *J* = 7.3 Hz, 1H), 7.87 (d, *J* = 1.7 Hz, 1H), 6.59 (t, *J* = 2.2 Hz, 1H), 5.19 (dd, *J* = 13.0, 5.5 Hz, 1H), 2.89 (ddd, *J* = 17.0, 13.9, 5.4 Hz, 1H), 2.61 (dt, *J* = 17.0, 3.1 Hz, 1H), 2.54 (dd, *J* = 13.3, 4.5 Hz, 1H), 2.11 – 2.03 (m, 1H). <sup>13</sup>C NMR (151 MHz, DMSO-*d*<sub>6</sub>) δ 173.3, 170.2, 166.7, 165.9, 142.7, 137.4, 136.7, 133.8, 133.4, 130.3, 122.2, 120.5, 108.0, 49.7, 31.4, 22.4. HRMS (ESI-TOF): calcd. for C<sub>16</sub>H<sub>13</sub>N<sub>4</sub>O<sub>4</sub> (M+H): 325.0937, found: *m/z* 325.0935.



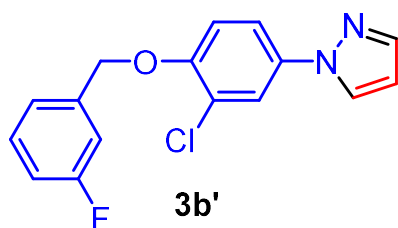

**1-[3-chloro-4-[(3-fluorobenzyl)oxy]phenyl]-1H-pyrazole (3b')**. For 0.2 mmol scales, the standard procedure was followed to provide **3b'** by column chromatography on silica gel (petroleum ether/EtOAc, 10:1, v/v) as white solid (45 mg, 75%). M.p.: 72-73 °C. Reaction time for this compound is 6 h. <sup>1</sup>H NMR

(600 MHz, Chloroform-*d*) δ 7.82 (s, 1H), 7.77 (s, 1H), 7.70 (s, 1H), 7.51 (dd, *J* = 8.9, 2.6 Hz, 1H), 7.36 (q, *J* = 6.7, 5.9 Hz, 1H), 7.25 – 7.18 (m, 2H), 7.07 – 6.97 (m, 2H), 6.45 (s, 1H), 5.18 (s, 2H). <sup>19</sup>F NMR (565 MHz, Chloroform-*d*) δ -112.37. <sup>13</sup>C NMR (151 MHz, Chloroform-*d*) δ 163.1 (d, *J* = 246.9 Hz), 152.5, 141.2, 138.9, 134.7, 130.4 (d, *J* = 8.0 Hz), 126.9, 124.2, 122.6, 121.9, 118.6, 115.1 (d, *J* = 21.2 Hz), 114.5, 114.1 (d, *J* = 22.2 Hz), 107.8, 70.5. **HRMS (ESI-TOF)**: calcd. for C<sub>16</sub>H<sub>13</sub>N<sub>2</sub>OFCl (M+H): 303.0700, found: *m/z* 303.0698.

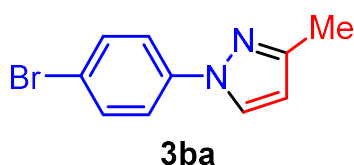

**1-(4-bromophenyl)-3-methyl-1H-pyrazole (3ba)**. For 0.2 mmol scales, the standard procedure was followed to provide **3ba** by column chromatography on silica gel (petroleum ether/EtOAc, 25:1, v/v) as brown solid (32 mg, 68%). M.p.: 92-93 °C. Reaction time for this

compound is 4 h. <sup>1</sup>H NMR (600 MHz, Chloroform-*d*) δ 7.76 (d, *J* = 2.4 Hz, 1H), 7.52 (s, 4H), 6.25 (d, *J* = 2.4 Hz, 1H), 2.36 (s, 3H). <sup>13</sup>C NMR (151 MHz, Chloroform-*d*) δ 151.1, 139.3, 132.5, 127.3, 120.2, 119.0, 108.1, 13.8. **HRMS (ESI-TOF)**: calcd. for C<sub>10</sub>H<sub>10</sub>N<sub>2</sub>Br (M+H): 237.0027, found: *m/z* 237.0029.

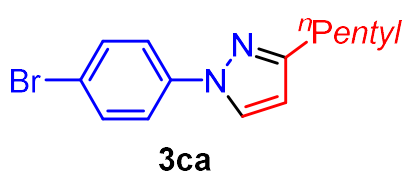

**1-(4-bromophenyl)-3-pentyl-1H-pyrazole (3ca)**.

For 0.2 mmol scales, the standard procedure was followed to provide **3ca** by column chromatography on silica gel (petroleum ether/EtOAc, 25:1, v/v) as red oil (28 mg, 48%). Reaction time for this compound is

8 h. <sup>1</sup>H NMR (600 MHz, Chloroform-*d*) δ 7.78 (d, *J* = 2.4 Hz, 1H), 7.52 – 7.55 (m, 4H), 6.27 (d, *J* = 2.4 Hz, 1H), 2.69 (t, *J* = 7.8 Hz, 2H), 1.79 – 1.62 (m, 2H), 1.47 – 1.22 (m, 4H), 0.91 (t, *J* = 7.1 Hz, 3H). <sup>13</sup>C NMR (151 MHz, Chloroform-*d*) δ 156.0, 139.4, 132.4, 127.2, 120.3, 119.0, 107.0, 31.7, 29.4, 28.5, 22.6, 14.1. **HRMS (ESI-TOF)**: calcd. for C<sub>14</sub>H<sub>18</sub>N<sub>2</sub>Br (M+H): 293.0653, found: *m/z* 293.0658.

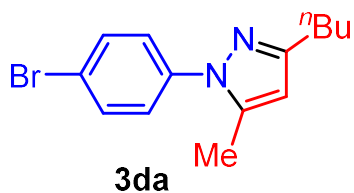

**1-(4-bromophenyl)-3-butyl-5-methyl-1H-pyrazole (3da)**. For 0.2 mmol scales, the standard procedure was

followed to provide **3da** by column chromatography on silica gel (petroleum ether/EtOAc, 25:1, v/v) as red oil (28 mg, 48%). Reaction time for this compound is 8 h. <sup>1</sup>H

NMR (600 MHz, Chloroform-*d*) δ 7.56 (dq, *J* = 9.0, 2.1 Hz, 2H), 7.32 (dq, *J* = 8.9, 2.1 Hz, 2H), 6.01 (s, 1H), 2.62 (q, *J* = 6.4, 4.8 Hz, 2H), 2.31 (s, 3H), 1.76 – 1.54 (m, 2H), 1.44 – 1.33 (m, 2H), 0.94 (t, *J* = 7.4 Hz, 3H). <sup>13</sup>C NMR (151 MHz, Chloroform-*d*) δ

154.4, 139.3, 139.1, 132.2, 126.2, 120.8, 106.5, 31.9, 28.0, 22.7, 14.0, 12.6. **HRMS (ESI-TOF)**: calcd. for C<sub>14</sub>H<sub>18</sub>N<sub>2</sub>Br (M+H): 293.0653, found: *m/z* 293.0646.

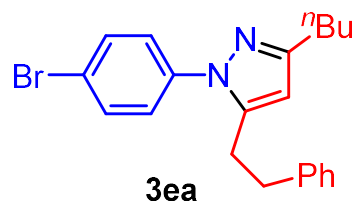

**3ea**

**1-(4-bromophenyl)-3-butyl-5-phenethyl-1H-pyrazole (3ea)**. For 0.2 mmol scales, the standard procedure was followed to provide **3ea** by column chromatography on silica gel (petroleum ether/EtOAc, 25:1, v/v) as red solid (34 mg, 44%). Reaction time for this compound is 8 h. **<sup>1</sup>H NMR** (600 MHz, Chloroform-*d*) δ 7.52 (d, *J* = 8.6 Hz,

2H), 7.25 (d, *J* = 6.1 Hz, 2H), 7.20 (d, *J* = 8.6 Hz, 3H), 7.08 (d, *J* = 7.8 Hz, 2H), 6.07 (s, 1H), 2.89 (q, *J* = 4.7 Hz, 4H), 2.63 (t, *J* = 7.8 Hz, 2H), 1.65 (t, *J* = 7.7 Hz, 2H), 1.45 – 1.32 (m, 2H), 0.94 (t, *J* = 7.4 Hz, 3H). **<sup>13</sup>C NMR** (151 MHz, Chloroform-*d*) δ 154.3, 143.5, 140.7, 139.0, 132.2, 128.6, 128.4, 126.9, 126.5, 121.2, 105.0, 35.2, 31.9, 28.5, 28.1, 22.6, 14.1. **HRMS (ESI-TOF)**: calcd. for C<sub>21</sub>H<sub>24</sub>N<sub>2</sub>Br (M+H): 383.1123, found: *m/z* 383.1125.

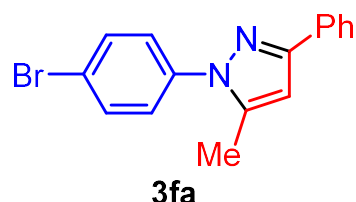

**3fa**

**1-(4-bromophenyl)-5-methyl-3-phenyl-1H-pyrazole (3fa)**. The standard procedure was followed to provide **3fa** by column chromatography on silica gel (petroleum ether/EtOAc, 10:1, v/v) as yellow oil (0.2 mmol, 29 mg, 46%). This compound was also prepared on a 4 mmol scale, and 0.52 g of **3fa** was obtained in 42% yield.

Reaction time for this compound is 8 h. **<sup>1</sup>H NMR** (600 MHz, Chloroform-*d*) δ 7.84 (d, *J* = 6.7 Hz, 2H), 7.61 (d, *J* = 8.6 Hz, 2H), 7.41 (dd, *J* = 11.1, 8.1 Hz, 4H), 7.32 (t, *J* = 7.4 Hz, 1H), 6.53 (s, 1H), 2.38 (s, 3H). **<sup>13</sup>C NMR** (151 MHz, Chloroform-*d*) δ 152.0, 140.3, 139.1, 133.2, 132.3, 128.7, 128.1, 126.4, 125.8, 121.3, 105.0, 12.8. **HRMS (ESI-TOF)**: calcd. for C<sub>16</sub>H<sub>14</sub>N<sub>2</sub>Br (M+H): 313.0340, found: *m/z* 313.0344.

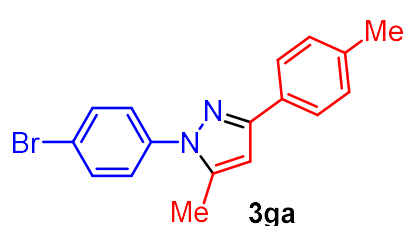

**3ga**

**1-(4-bromophenyl)-5-methyl-3-(*p*-tolyl)-1H-pyrazole (3ga)**. For 0.2 mmol scales, the standard procedure (1.0 equiv. K<sub>2</sub>CO<sub>3</sub> instead of KHCO<sub>3</sub>) was followed to provide **3ga** by column chromatography on silica gel (petroleum ether/EtOAc, 25:1, v/v) as yellow solid (27 mg, 41%). M.p.: 90-91 °C. Reaction

time for this compound is 10 h. **<sup>1</sup>H NMR** (600 MHz, Chloroform-*d*) δ 7.73 (d, *J* = 8.2 Hz, 2H), 7.60 (d, *J* = 8.7 Hz, 2H), 7.42 (d, *J* = 8.8 Hz, 2H), 7.21 (d, *J* = 7.8 Hz, 2H), 6.50 (s, 1H), 2.38 (s, 6H). **<sup>13</sup>C NMR** (151 MHz, Chloroform-*d*) δ 152.0, 140.1, 139.1, 137.8, 132.3, 130.3, 129.4, 126.4, 125.7, 121.2, 104.8, 21.4, 12.8. **HRMS (ESI-TOF)**: calcd. for C<sub>17</sub>H<sub>16</sub>N<sub>2</sub>Br (M+H): 327.0497, found: *m/z* 327.0497.

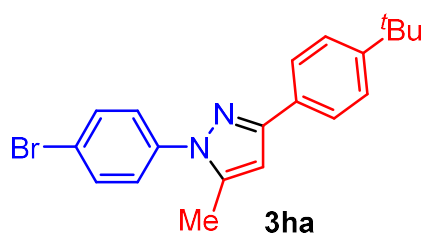

**1-(4-bromophenyl)-3-[4-(*tert*-butyl)phenyl]-5-methyl-1*H*-pyrazole (3ha).** For 0.2 mmol scales, the standard procedure was followed to provide **3ha** by column chromatography on silica gel (petroleum ether/EtOAc, 25:1, v/v) as yellow solid (29 mg, 40%). M.p.: 117-118 °C. Reaction time for this

compound is 10 h.  $^1\text{H NMR}$  (600 MHz, Chloroform-*d*)  $\delta$  7.77 (d,  $J = 8.4$  Hz, 2H), 7.61 (d,  $J = 8.6$  Hz, 2H), 7.42 (t,  $J = 8.2$  Hz, 4H), 6.50 (s, 1H), 2.38 (s, 3H), 1.35 (s, 9H).  $^{13}\text{C NMR}$  (151 MHz, Chloroform-*d*)  $\delta$  152.0, 151.1, 140.1, 139.1, 132.3, 130.4, 126.4, 125.6, 125.5, 121.1, 104.9, 34.7, 31.4, 12.8. **HRMS (ESI-TOF):** calcd. for  $\text{C}_{20}\text{H}_{22}\text{N}_2\text{Br}$  (M+H): 369.0966, found:  $m/z$  369.0966.

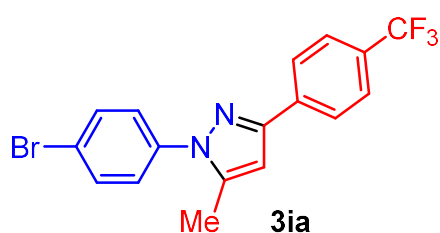

**1-(4-bromophenyl)-5-methyl-3-[4-(trifluoromethyl)phenyl]-1*H*-pyrazole (3ia).** For 0.2 mmol scales, the standard procedure was followed to provide **3ia** by column chromatography on silica gel (petroleum ether/EtOAc, 20:1, v/v) as yellow oil (35 mg, 46%).

Reaction time for this compound is 10 h.  $^1\text{H NMR}$  (600 MHz, Chloroform-*d*)  $\delta$  7.95 (d,  $J = 8.8$  Hz, 2H), 7.88 – 7.54 (m, 4H), 7.41 (d,  $J = 8.0$  Hz, 2H), 6.57 (s, 1H), 2.39 (s, 3H).  $^{19}\text{F NMR}$  (565 MHz, Chloroform-*d*)  $\delta$  -62.33.  $^{13}\text{C NMR}$  (151 MHz, Chloroform-*d*)  $\delta$  150.5, 140.7, 138.8, 136.7, 132.4, 129.8 (q,  $J = 32.5$  Hz), 126.4, 126.2 (q,  $J = 271.8$  Hz), 125.9, 125.7 (q,  $J = 3.9$  Hz), 121.7, 105.2, 12.7. **HRMS (ESI-TOF):** calcd. for  $\text{C}_{17}\text{H}_{13}\text{N}_2\text{F}_3\text{Br}$  (M+H): 381.0214, found:  $m/z$  381.0215.

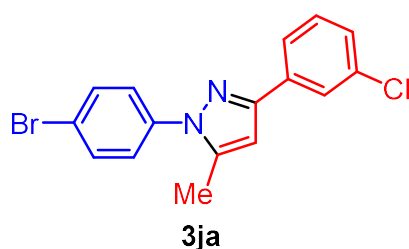

**1-(4-bromophenyl)-3-(3-chlorophenyl)-5-methyl-1*H*-pyrazole (3ja).** For 0.2 mmol scales, the standard procedure was followed to provide **3ja** by column chromatography on silica gel (petroleum ether/EtOAc, 20:1, v/v) as red oil (33 mg, 48%).

Reaction time for this compound is 10 h.  $^1\text{H NMR}$  (600 MHz, Chloroform-*d*)  $\delta$  7.84 (s, 1H), 7.70 (d,  $J = 7.6$  Hz, 1H), 7.62 (dd,  $J = 8.7, 3.1$  Hz, 2H), 7.41 (dd,  $J = 8.8, 3.0$  Hz, 2H), 7.33 (td,  $J = 7.8, 3.1$  Hz, 1H), 7.28 (d,  $J = 8.0$  Hz, 1H), 6.51 (s, 1H), 2.38 (s, 3H).  $^{13}\text{C NMR}$  (151 MHz, Chloroform-*d*)  $\delta$  150.6, 140.5, 138.9, 135.0, 134.7, 132.4, 130.0, 128.0, 126.4, 125.9, 123.9, 121.5, 105.0, 12.7. **HRMS (ESI-TOF):** calcd. for  $\text{C}_{16}\text{H}_{13}\text{N}_2\text{ClBr}$  (M+H): 346.9951, found:  $m/z$  346.9950.

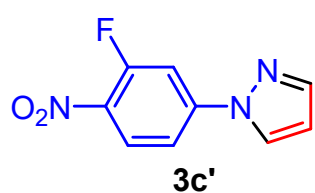

**1-(3-fluoro-4-nitrophenyl)-1*H*-pyrazole (3c').** For 0.2 mmol scales, the standard procedure was followed to provide **3c'** by column chromatography on silica gel (petroleum ether/EtOAc, 5:1, v/v) as yellow solid (35 mg, 84%). M.p.: 133-134 °C. Reaction time for this compound is 5 h.  $^1\text{H}$

**NMR** (600 MHz, Chloroform-*d*)  $\delta$  8.28 – 8.16 (m, 1H), 8.01 (d,  $J = 2.7$  Hz, 1H), 7.80 (s, 1H), 7.73 (dd,  $J = 12.1, 2.3$  Hz, 1H), 7.62 (ddd,  $J = 9.0, 2.3, 1.2$  Hz, 1H), 6.60 – 6.53 (m, 1H).  **$^{19}\text{F}$  NMR** (565 MHz, Chloroform-*d*)  $\delta$  -112.84.  **$^{13}\text{C}$  NMR** (151 MHz, Chloroform-*d*)  $\delta$  156.8 (d,  $J = 265.8$  Hz), 145.2 (d,  $J = 10.3$  Hz), 143.3, 134.5, 128.0, 127.2, 113.4 (d,  $J = 3.7$  Hz), 110.0, 108.2 (d,  $J = 25.9$  Hz). **HRMS (ESI-TOF)**: calcd. for  $\text{C}_9\text{H}_7\text{N}_3\text{O}_2\text{F}$  (M+H): 208.0522, found:  $m/z$  208.0521.

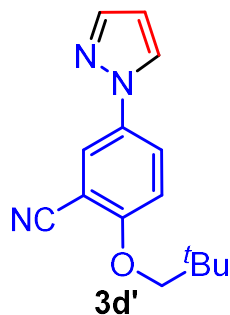

**2-(neopentyloxy)-5-(1H-pyrazol-1-yl)benzonitrile (3d')**. For 0.2 mmol scales, the standard procedure was followed to provide **3d'** by column chromatography on silica gel (petroleum ether/EtOAc, 5:1, v/v) as yellow solid (46 mg, 90%). M.p.: 88-89 °C. Reaction time for this compound is 8 h.  **$^1\text{H}$  NMR** (600 MHz, Chloroform-*d*)  $\delta$  7.87 – 7.78 (m, 3H), 7.69 (d,  $J = 1.8$  Hz, 1H), 7.05 – 6.89 (m, 1H), 6.46 (t,  $J = 2.1$  Hz, 1H), 3.71 (s, 2H), 1.08 (s, 9H).  **$^{13}\text{C}$  NMR** (151 MHz, Chloroform-*d*)  $\delta$  159.6, 141.5, 133.7, 126.8, 125.3, 124.2, 115.6, 113.2, 108.2, 102.7, 79.3, 32.2, 26.6. **HRMS (ESI-TOF)**: calcd. for  $\text{C}_{15}\text{H}_{18}\text{N}_3\text{O}$  (M+H): 256.1450, found:  $m/z$  256.1454.

## Synthetic Transformations

General procedure for the synthesis of 4-chlorinated *N*<sup>1</sup>-Aryl pyrazoles from the corresponding *N*<sup>1</sup>-Aryl pyrazoles.

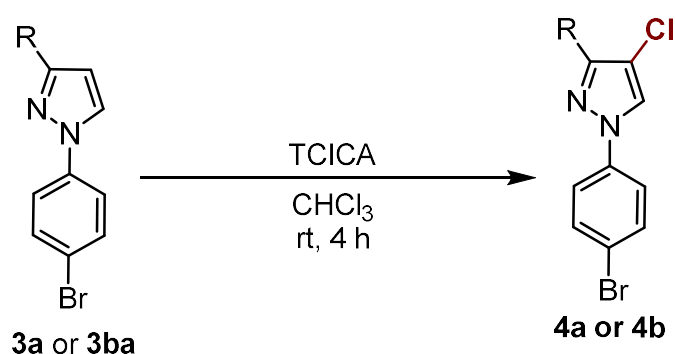

An oven-dried Schlenk tube equipped with a magnetic stir bar was charged with *N*<sup>1</sup>-Aryl pyrazole **3a** (0.2 mmol, 44.4 mg, 1.0 equiv.) or **3ba** (0.2 mmol, 23.4 mg, 1.0 equiv.), TCICA (0.24 mmol, 1.2 equiv., 55.8 mg, CAS: 87-90-1), then chloroform (2 mL) was added. The resulting mixture was allowed to stir at room temperature for 4 hours in Argon atmosphere. The resulting clear organic solution was concentrated under reduced pressure, and the residue was further purified by a silica gel column chromatography to yield the corresponding 4-chlorinated *N*<sup>1</sup>-Aryl pyrazoles.

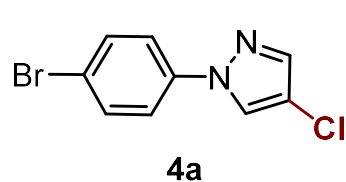

**1-(4-bromophenyl)-4-chloro-1*H*-pyrazole (4a).**<sup>[5]</sup> For 0.2 mmol scales, the standard procedure was followed to provide **4a** by column chromatography on silica gel (petroleum ether/EtOAc, 30:1, v/v) as yellow solid (49 mg, 95%). M.p.: 84-85 °C. <sup>1</sup>H NMR (600 MHz, Chloroform-*d*) δ 7.86 (s, 1H), 7.63 (s, 1H), 7.56 (d, *J* = 7.8 Hz, 2H), 7.51 (d, *J* = 9.1 Hz, 2H). <sup>13</sup>C NMR (151 MHz, Chloroform-*d*) δ 139.9, 138.8, 132.7, 124.8, 120.4, 120.4, 113.0. HRMS (ESI-TOF): calcd. for C<sub>9</sub>H<sub>7</sub>N<sub>2</sub>ClBr (M+H): 256.9481, found: *m/z* 256.9480.

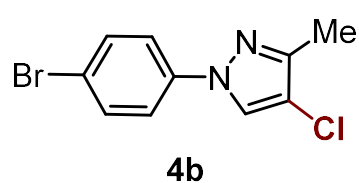

**1-(4-bromophenyl)-4-chloro-3-methyl-1*H*-pyrazole (4b).** For 0.1 mmol scales, the standard procedure was followed to provide **4b** by column chromatography on silica gel (petroleum ether/EtOAc, 20:1, v/v) as white solid (27 mg, 95%). M.p.: 84-85 °C. <sup>1</sup>H NMR (600 MHz, Chloroform-*d*) δ 7.80 (s, 1H), 7.54 (d, *J* = 8.8 Hz, 2H), 7.48 (d, *J* = 8.9 Hz, 2H), 2.32 (s, 3H). <sup>13</sup>C NMR (151 MHz, Chloroform-*d*) δ 148.3, 138.8, 132.6, 124.8, 120.0, 119.7, 112.4, 11.3. HRMS (ESI-TOF): calcd. for C<sub>10</sub>H<sub>9</sub>N<sub>2</sub>ClBr (M+H): 270.9638, found: *m/z* 270.9636.

General procedure for the synthesis of 4-brominated  $N^1$ -Aryl pyrazoles from the corresponding  $N^1$ -Aryl pyrazoles.

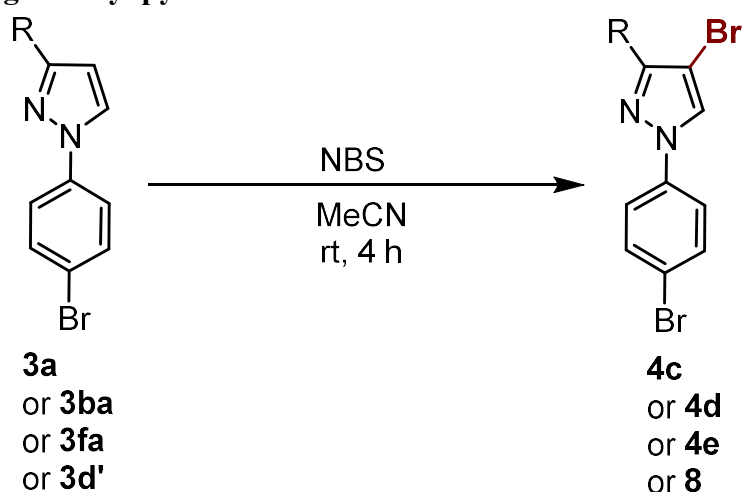

An oven-dried Schlenk tube equipped with a magnetic stir bar was charged with  $N^1$ -Aryl pyrazole **3a** (0.2 mmol, 44.4 mg, 1.0 equiv.) or **3ba** (0.2 mmol, 23.4 mg, 1.0 equiv.), or **3fa** (0.2 mmol, 62.4 mg, 1.0 equiv.) or **3d'** (0.2 mmol, 51 mg, 1.0 equiv.), NBS (0.24 mmol, 42.7 mg, 1.2 equiv., CAS: 128-08-5), then acetonitrile (2 mL) was added. The resulting mixture was allowed to stir at room temperature for 4 hours in argon atmosphere. The resulting clear organic solution was concentrated under reduced pressure, and the residue was further purified by a silica gel column chromatography to yield the corresponding 4-brominated  $N^1$ -Aryl pyrazoles.

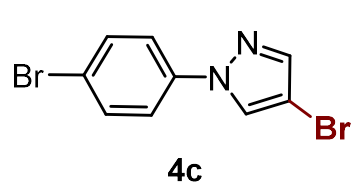

**4-bromo-1-(4-bromophenyl)-1H-pyrazole (4c).**<sup>[5]</sup> For 0.2 mmol scales, the standard procedure was followed to provide **4c** by column chromatography on silica gel (petroleum ether/EtOAc, 25:1, v/v) as red solid (51 mg, 85%). M.p.: 60-61 °C.  $^1\text{H NMR}$  (600 MHz, Chloroform-*d*)  $\delta$  7.87 (s, 1H), 7.63 (s, 1H), 7.56 (d,  $J = 8.8$  Hz, 2H), 7.51 (d,  $J = 8.6$  Hz, 2H).  $^{13}\text{C NMR}$  (151 MHz, Chloroform-*d*)  $\delta$  139.9, 138.8, 132.7, 124.8, 120.4, 120.4, 113.0. **HRMS (ESI-TOF)**: calcd. for  $\text{C}_9\text{H}_7\text{N}_2\text{Br}_2$  (M+H): 300.8976, found:  $m/z$  300.8974.

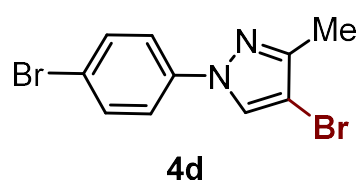

**4-bromo-1-(4-bromophenyl)-3-methyl-1H-pyrazole (4d).** For 0.1 mmol scales, the standard procedure was followed to provide **4d** by column chromatography on silica gel (petroleum ether/EtOAc, 20:1, v/v) as white solid (28 mg, 88%). M.p.: 91-92 °C.  $^1\text{H NMR}$  (600 MHz, Chloroform-*d*)  $\delta$  7.83 (d,  $J = 6.1$  Hz, 1H), 7.54 (dd,  $J = 6.2, 2.6$  Hz, 2H), 7.49 (dd,  $J = 6.0, 2.8$  Hz, 2H), 2.32 (s, 3H).  $^{13}\text{C NMR}$  (151 MHz, Chloroform-*d*)  $\delta$  149.8, 138.8, 132.6, 127.2, 120.1, 119.8, 97.2, 12.2. **HRMS (ESI-TOF)**: calcd. for  $\text{C}_{10}\text{H}_9\text{N}_2\text{Br}_2$  (M+H): 314.9132, found:  $m/z$  314.9129.

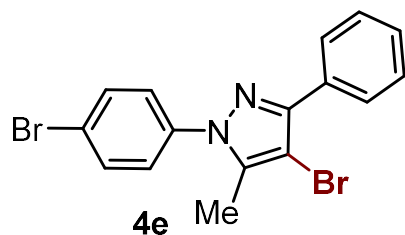

**4-bromo-1-(4-bromophenyl)-5-methyl-3-phenyl-1H-pyrazole (4e).** For 0.2 mmol scales, the standard procedure was followed to provide **4e** by column chromatography on silica gel (petroleum ether/EtOAc, 20:1, v/v) as yellow oil (58 mg, 74%).  $^1\text{H NMR}$  (600 MHz, Chloroform-*d*)  $\delta$  7.94 (d,  $J = 7.0$  Hz, 2H), 7.63 (d,  $J = 8.7$  Hz, 2H), 7.45 (t,  $J = 7.5$  Hz, 2H), 7.41 – 7.37 (m, 3H), 2.39 (s, 3H).  $^{13}\text{C NMR}$  (151 MHz, Chloroform-*d*)  $\delta$  149.4, 139.0, 138.8, 132.5, 132.0, 128.5, 128.5, 127.9, 126.4, 122.0, 94.9, 12.1. **HRMS (ESI-TOF)**: calcd. for  $\text{C}_{16}\text{H}_{13}\text{N}_2\text{Br}_2$  (M+H): 390.9445, found:  $m/z$  390.9447.

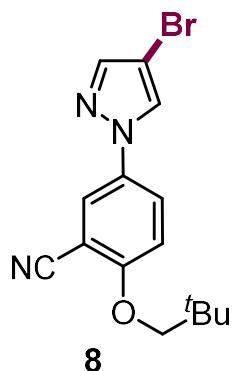

**5-(4-bromo-1H-pyrazol-1-yl)-2-(neopentyloxy)benzonitrile (8).** For 0.2 mmol scales, the standard procedure was followed to provide **8** by column chromatography on silica gel (petroleum ether/EtOAc, 8:1, v/v) as yellow solid (35 mg, 52%). M.p.: 102–103 °C.  $^1\text{H NMR}$  (600 MHz, Chloroform-*d*)  $\delta$  7.85 (d,  $J = 2.2$  Hz, 1H), 7.82 (t,  $J = 2.5$  Hz, 1H), 7.78 (dt,  $J = 9.1, 2.5$  Hz, 1H), 7.66 (d,  $J = 2.2$  Hz, 1H), 7.03 (dd,  $J = 9.1, 2.2$  Hz, 1H), 3.73 (d,  $J = 2.1$  Hz, 2H), 1.10 (d,  $J = 1.9$  Hz, 9H).  $^{13}\text{C NMR}$  (151 MHz, Chloroform-*d*)  $\delta$  160.0, 141.9, 133.1, 127.0, 125.1, 124.2, 115.4, 113.2, 102.9, 96.2, 79.4, 32.2, 26.6. **HRMS (ESI-TOF)**: calcd. for  $\text{C}_{15}\text{H}_{11}\text{N}_3\text{OBr}$  (M+H): 334.0555, found:  $m/z$  334.0560.

**General procedure for the synthesis of 4-iodinated  $N^1$ -Aryl pyrazoles from the corresponding  $N^1$ -Aryl pyrazoles.**

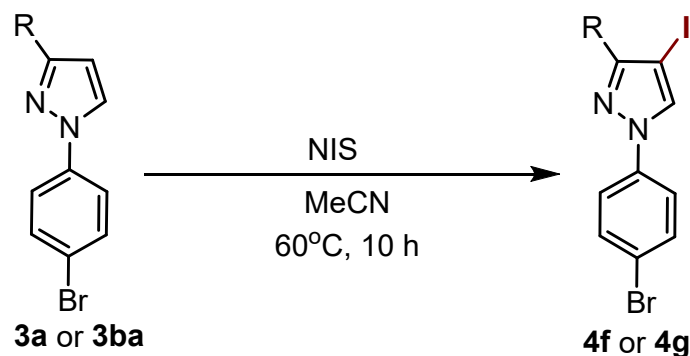

An oven-dried Schlenk tube equipped with a magnetic stir bar was charged with  $N^1$ -Aryl pyrazole **3a** (0.2 mmol, 44.4 mg, 1.0 equiv.) or **3ba** (0.2 mmol, 23.4 mg, 1.0 equiv.), NIS (0.6 mmol, 135 mg, 3.0 equiv., CAS: 516-12-1), then acetonitrile (2 mL) was added. The resulting mixture was allowed to stir at 60 °C for 10 hours in argon atmosphere. The resulting clear organic solution was concentrated under reduced pressure, and the residue was further purified by a silica gel column chromatography to yield the corresponding 4-iodinated  $N^1$ -Aryl pyrazoles.

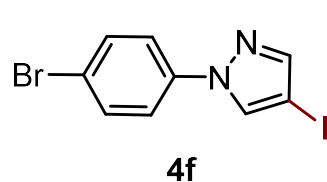

**1-(4-bromophenyl)-4-iodo-1H-pyrazole (4f).** For 0.2 mmol scales, the standard procedure was followed to provide **4f** by column chromatography on silica gel (petroleum ether/EtOAc, 20:1, v/v) as white solid (60 mg, 86%). M.p.: 109-110 °C.  $^1\text{H NMR}$  (600 MHz, Chloroform-*d*)  $\delta$  7.92 (d,  $J$  = 2.8 Hz, 1H), 7.70 (s, 1H), 7.56 (dd,  $J$  = 9.0, 2.6 Hz, 2H), 7.51 (dd,  $J$  = 9.0, 2.7 Hz, 2H).  $^{13}\text{C NMR}$  (151 MHz, Chloroform-*d*)  $\delta$  146.3, 138.5, 132.7, 131.3, 120.5, 120.4, 59.6. **HRMS (ESI-TOF)**: calcd. for  $\text{C}_9\text{H}_7\text{N}_2\text{BrI}$  (M+H): 348.8837, found:  $m/z$  348.8837.

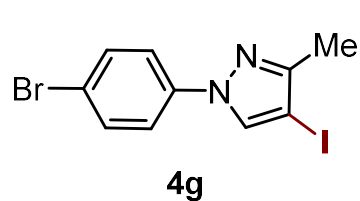

**1-(4-bromophenyl)-4-iodo-3-methyl-1H-pyrazole (4g).** For 0.2 mmol scales, the standard procedure was followed to provide **4g** by column chromatography on silica gel (petroleum ether/EtOAc, 20:1, v/v) as white solid (69 mg, 95%). M.p.: 90-91 °C.  $^1\text{H NMR}$  (600 MHz, Chloroform-*d*)  $\delta$  7.84 (s, 1H), 7.54 (d,  $J$  = 8.8 Hz, 2H), 7.48 (d,  $J$  = 8.8 Hz, 2H), 2.33 (s, 3H).  $^{13}\text{C NMR}$  (151 MHz, Chloroform-*d*)  $\delta$  153.1, 138.6, 132.6, 131.8, 120.1, 119.8, 63.3, 13.8. **HRMS (ESI-TOF)**: calcd. for  $\text{C}_{10}\text{H}_9\text{N}_2\text{BrI}$  (M+H): 362.8994, found:  $m/z$  362.8997.



**General Procedure for electrophilic and nucleophilic functionalizations of  $N^1$ -Aryl pyrazoles.<sup>16-91</sup>**

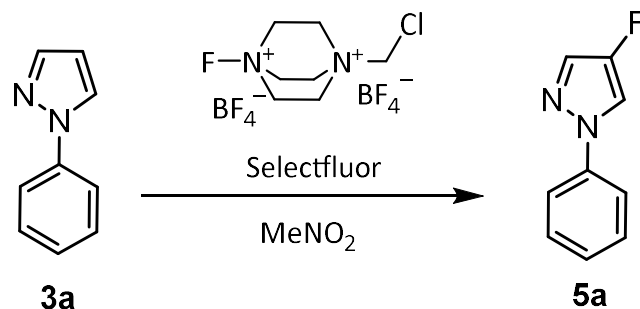

A dried 10 mL Schlenk tube equipped with a magnetic stirrer was charged with 1-phenyl-1*H*-pyrazole **3a** (0.50 mmol, 72.0 mg, 1.0 equiv.), Selectfluor (1.0 mmol, 354.3 mg, 2.0 equiv.), Na<sub>2</sub>CO<sub>3</sub> (0.20 mmol, 21.2 mg, 40 mol%) and MeNO<sub>2</sub> (2.0 mL) was stirred at 80 °C for 48 h under air. The reaction mixture was cooled to room temperature and then filtered through a pad of Celite and concentrated under reduced pressure. The residue was then charged on silica gel column and eluted with a mixture of ethyl acetate/petroleum ether (1:40) to give the desired product **5a**. **4-Fluoro-1-phenyl-1*H*-pyrazole (5a)**. Yellow solid (33 mg, 50%). M.p.: 37-38 °C. <sup>1</sup>H NMR (400 MHz, Chloroform-*d*) δ 7.80 (d, *J* = 4.8 Hz, 1H), 7.62 (d, *J* = 8.2 Hz, 2H), 7.57 (d, *J* = 4.3 Hz, 1H), 7.45 (t, *J* = 8.0 Hz, 2H), 7.30 (t, *J* = 7.5 Hz, 1H). <sup>19</sup>F NMR (376 MHz, Chloroform-*d*) δ -175.06. <sup>13</sup>C NMR (101 MHz, Chloroform-*d*) δ 151.2 (d, *J* = 248.6 Hz), 140.1, 129.5, 128.5 (d, *J* = 13.7 Hz), 126.7, 118.7, 113.0 (d, *J* = 28.4 Hz). HRMS (ESI-TOF): calcd. for C<sub>9</sub>H<sub>8</sub>N<sub>2</sub>F (M+H): 163.0672, found: *m/z* 163.0670.

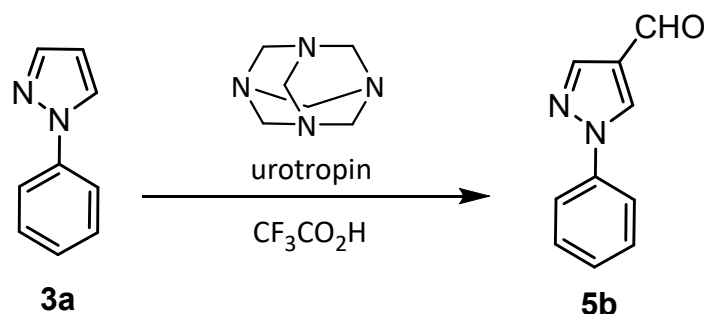

To a 100 mL round-bottom flask, 1.00 mmol of 1-phenyl-1*H*-pyrazoles **3a** (2.0 mmol, 288.1 mg, 1.0 equiv.), hexamethylenetetramine (3.0 mmol, 420.6 mg, 1.5 equiv.) and trifluoroacetic acid (5 mL) were added. The reaction was heated under reflux with stirring for 12 h. At the end of the reaction, the resulting solution was neutralized with a 10% NaHCO<sub>3</sub> solution in an ice bath and the precipitate was filtered off under vacuum. **1-Phenyl-1*H*-pyrazole-4-carbaldehyde (5b)**. White solid (179 mg, 52%). M.p.: 84-85 °C. <sup>1</sup>H NMR (400 MHz, Chloroform-*d*) δ 9.97 (s, 1H), 8.44 (s, 1H), 8.17 (s, 1H), 7.72 (d, *J* = 8.0 Hz, 2H), 7.51 (t, *J* = 7.9 Hz, 2H), 7.39 (t, *J* = 7.6 Hz, 1H). <sup>13</sup>C NMR (101 MHz, Chloroform-*d*) δ 184.0, 141.7, 139.2, 130.0, 129.7, 128.0, 125.7, 119.8. HRMS (ESI-TOF): calcd. for C<sub>10</sub>H<sub>9</sub>N<sub>2</sub>O (M+H): 173.0715, found: *m/z* 173.0718.

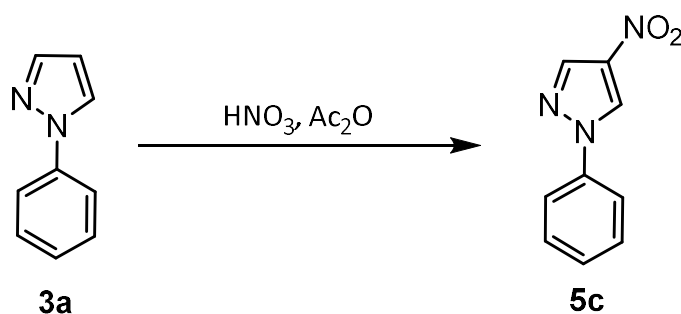

1-Phenyl-1*H*-pyrazole **3a** (72 mg, 0.5 mmol) was added to a cold mixture (-10 °C) of acetic anhydride (2 mL) and conc. HNO<sub>3</sub> (0.1 mL) and stirring was continued at ambient temperature for 4 hrs. The reaction mixture quenched with cold water and filtered. Isolation of the filter cake, which was then charged on silica gel column and eluted with a mixture of ethyl acetate/petroleum ether (1:10) to give the desired product **5c**. **4-Nitro-1-phenyl-1*H*-pyrazole (5c)**. White solid (23 mg, 61%). M.p.: 127-128 °C. <sup>1</sup>H NMR (600 MHz, Chloroform-*d*) δ 8.63 (s, 1H), 8.26 (s, 1H), 7.71 (d, *J* = 8.6 Hz, 2H), 7.53 (t, *J* = 7.5 Hz, 2H), 7.44 (t, *J* = 7.4 Hz, 1H). <sup>13</sup>C NMR (101 MHz, Chloroform-*d*) δ 138.7, 136.7, 129.9, 128.7, 125.8, 120.1, 119.8. **HRMS (ESI-TOF)**: calcd. for C<sub>9</sub>H<sub>8</sub>N<sub>3</sub>O<sub>2</sub> (M+H): 190.0617, found: *m/z* 190.0612.

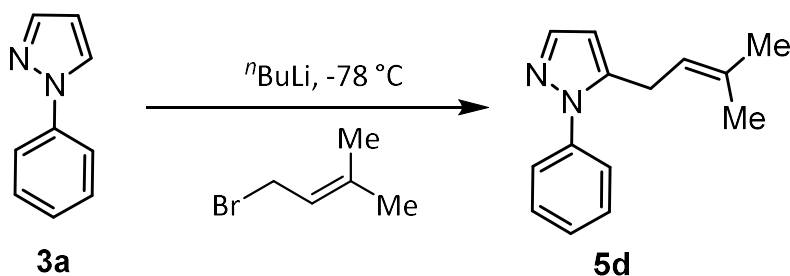

A dried 10 mL Schlenk tube equipped with a magnetic stirrer was charged with 1-phenyl-1*H*-pyrazole **3a** (1.0 mmol, 144.2 mg, 1 equiv.) and dry THF were loaded to the flask, and the mixture was cooled to -78 °C. To the stirred solution <sup>n</sup>BuLi (1.2 mmol, 0.75 mL, 1.2 equiv., 1.6 M in THF) was added dropwise. When the addition was finished, the mixture was stirred for 1 hour at the same temperature. Then, a solution of 3-methyl-2-butenyl bromide (1.2 mmol, 178.8 mg, 1.2 equiv.) in THF was added dropwise. The mixture was stirred for 2 h at the same temperature. The cooling bath was removed, and the mixture was stirred at rt for 12 h. The reaction mixture was diluted with a saturated solution of ammonium chloride and concentrated under reduced pressure. The residue was dissolved in ethyl acetate and washed with a sodium bicarbonate solution (3 times). The organic layer was separated, dried over sodium sulfate, and concentrated under reduced pressure. The residue was then charged on silica gel column and eluted with a mixture of ethyl acetate/petroleum ether (1:10) to give the desired product **5d**. **5-(3-methylbut-2-en-1-yl)-1-phenyl-1*H*-pyrazole (5d)**. Yellow liquid (144 mg, 68%). <sup>1</sup>H NMR (400 MHz, Chloroform-*d*) δ 7.58 (s, 1H), 7.44 (d, *J* = 5.8 Hz, 4H), 7.37 (dt, *J* = 8.5, 4.4 Hz, 1H), 6.19 (s, 1H), 5.23 (t, *J* = 6.9 Hz, 1H), 3.34 (d, *J* = 7.0 Hz, 2H), 1.70 (s, 3H), 1.56 (s, 3H). <sup>13</sup>C NMR (101 MHz, Chloroform-*d*) δ 142.8, 139.9, 133.9, 129.0, 127.7, 125.4, 120.2, 105.8, 25.6, 25.5, 17.7. **HRMS**

(ESI-TOF): calcd. for C<sub>14</sub>H<sub>17</sub>N<sub>2</sub> (M+H): 213.1392, found: *m/z* 213.1389.

### General Procedure for the Rh(III)-Catalyzed *ortho* C–H Functionalization of Arenes with Diazo Compounds.<sup>[10]</sup>

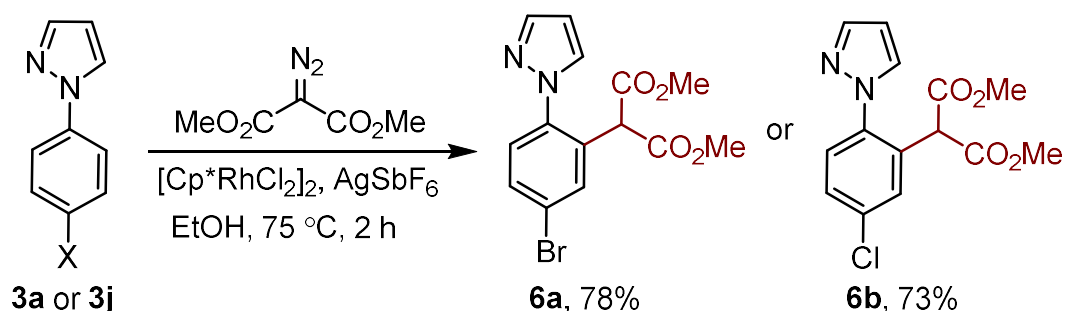

A dried 10 mL Schlenk tube equipped with a magnetic stirrer was charged with 1-aryl-1H-pyrazole **3a** (0.2 mmol, 44.4 mg, 1.0 equiv.) or **3j** (0.2 mmol, 35.6 mg, 1.0 equiv.), [Cp<sup>\*</sup>RhCl<sub>2</sub>]<sub>2</sub> (2 μmol, 1 mg, 1mol%), AgSbF<sub>6</sub> (10 μmol, 3 mg, 5mol%), and EtOH (2 mL) under Ar. After the reaction mixture was stirred at room temperature for 1 h, diazo compound (0.24 mmol, 38 mg, 1.2 equiv.) was then added in one pot, and the mixture was stirred at 75 °C for 2 h. The reaction mixture was cooled to room temperature and then filtered through a pad of Celite and concentrated under reduced pressure. The residue was then charged on silica gel column and eluted with a mixture of ethyl acetate/petroleum ether (1:8) to give the desired product **6a** or **6b**.

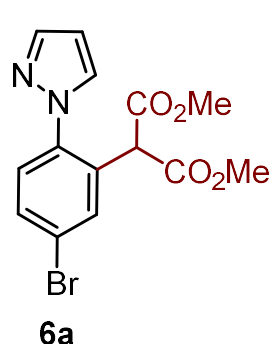

**dimethyl 2-[5-bromo-2-(1H-pyrazol-1-yl)phenyl]malonate (6a).** For 0.2 mmol scales, the standard procedure was followed to provide **6a** by column chromatography on silica gel (petroleum ether/EtOAc, 5:1, v/v) as white solid (58 mg, 78%). M.p.: 92-93 °C. <sup>1</sup>H NMR (600 MHz, Chloroform-*d*) δ 7.76 (d, *J* = 2.2 Hz, 1H), 7.72 (d, *J* = 1.9 Hz, 1H), 7.63 (d, *J* = 2.4 Hz, 1H), 7.54 (dd, *J* = 8.4, 2.2 Hz, 1H), 7.21 (d, *J* = 8.4 Hz, 1H), 6.45 (t, *J* = 2.1 Hz, 1H), 4.94 (s, 1H), 3.73 (s, 6H). <sup>13</sup>C NMR (151 MHz, Chloroform-*d*) δ 168.1, 141.6, 138.8, 133.5, 132.3, 131.1, 130.6, 127.4, 122.4, 107.5, 53.3, 52.1. **HRMS (ESI-TOF):** calcd. for C<sub>14</sub>H<sub>14</sub>N<sub>2</sub>O<sub>4</sub>Br (M+H): 353.0137, found: *m/z* 353.0139.

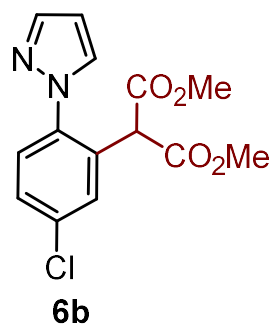

**dimethyl 2-[5-chloro-2-(1H-pyrazol-1-yl)phenyl]malonate (6b).** For 0.2 mmol scales, the standard procedure was followed to provide **6b** by column chromatography on silica gel (petroleum ether/EtOAc, 25:1, v/v) as white solid (45 mg, 73%). M.p.: 74-75 °C. <sup>1</sup>H NMR (400 MHz, Chloroform-*d*) δ 7.72 (d, *J* = 2.0 Hz, 1H), 7.66 – 7.59 (m, 2H), 7.39 (dd, *J* = 8.5, 2.4 Hz, 1H), 7.27 (d, *J* = 8.5 Hz, 1H), 6.45 (t, *J* = 2.2 Hz, 1H), 4.93 (s, 1H), 3.73 (s, 6H). <sup>13</sup>C NMR (101 MHz, Chloroform-*d*) δ 168.1, 141.6, 138.3, 134.5, 131.1, 130.6, 130.4, 129.3, 127.2, 107.4, 53.2, 52.2. **HRMS (ESI-TOF):** calcd. for C<sub>14</sub>H<sub>14</sub>N<sub>2</sub>O<sub>4</sub>Cl (M+H): 309.0642, found: *m/z* 309.0645.

**General Procedure for the synthesis of aromatic amine (7) from nitroarene (3c').**

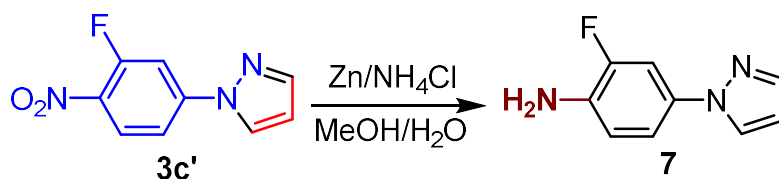

A dried 10 mL Schlenk tube equipped with a magnetic stirrer was charged with 1-(3-fluoro-4-nitrophenyl)-1H-pyrazole **3c'** (1.0 equiv., 30.7 mg, 0.1 mmol), zinc powder (10 equiv., 65.4 mg, 1 mmol), ammonium chloride (15 equiv., 80 mg, 1.5 mmol), MeOH (2 mL) and H<sub>2</sub>O (1 mL). After the reaction mixture was stirred at room temperature for 5 h. The reaction mixture was filtered through a pad of Celite and concentrated under reduced pressure. The residue was then charged on silica gel column and eluted with a mixture of ethyl acetate/petroleum ether (1:2) to give the desired product **7**.

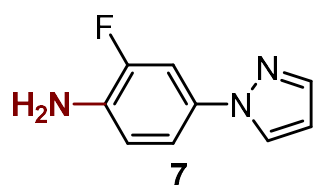

**2-fluoro-4-(1H-pyrazol-1-yl)aniline (7).** For 0.1 mmol scales, the standard procedure was followed to provide **7** by column chromatography on silica gel (petroleum ether/EtOAc, 2:1, v/v) as yellow oil (15 mg, 55%). <sup>1</sup>H NMR (600 MHz, Chloroform-*d*) δ 7.76 (d, *J* = 2.4 Hz, 1H), 7.66 (s, 1H), 7.37 (d, *J* = 13.1 Hz, 1H), 7.22 (d, *J* = 8.6 Hz, 1H), 6.81 (t, *J* = 8.9 Hz, 1H), 6.46 – 6.38 (m, 1H). <sup>19</sup>F NMR (565 MHz, Chloroform-*d*) δ -132.79. <sup>13</sup>C NMR (151 MHz, Chloroform-*d*) δ 151.4 (d, *J* = 240.0 Hz), 140.7, 133.3 (d, *J* = 12.8 Hz), 132.3 (d, *J* = 8.7 Hz), 126.8, 117.0 (d, *J* = 4.6 Hz), 115.6 (d, *J* = 3.6 Hz), 108.0 (d, *J* = 23.1 Hz), 107.3. HRMS (ESI-TOF): calcd. for C<sub>9</sub>H<sub>9</sub>N<sub>3</sub>F (M+H): 178.0781, found: *m/z* 178.0782.

## Mechanistic studies.

**General procedure for the synthesis of  $N^I$ -Aryl pyrazoles from the corresponding aryl diazonium salts and propargynyl borates.**

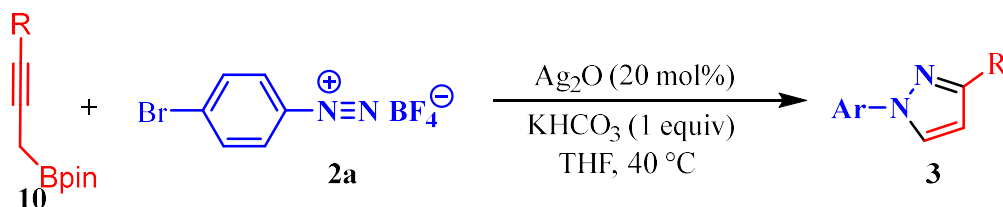

An oven-dried Schlenk tube equipped with a magnetic stir bar was charged with aryl diazonium salts **2** (0.4 mmol, 2.0 equiv., 108 mg), Ag<sub>2</sub>O (0.04 mmol, 20 mol%, 9.2 mg), KHCO<sub>3</sub> (0.2 mmol, 1.0 equiv., 20 mg), then THF (1 mL) was added. After that, propargynyl borates **10** (0.2 mmol, 1.0 equiv.) in 1 mL THF was added slowly in 3 minutes. The resulting mixture was allowed to stir at 40 °C in Argon atmosphere for 8 hours. Then the mixture was filtered through a Celite plug, rinsed with ethyl acetate. The resulting clear organic solution was concentrated under reduced pressure, and the residue was further purified by a silica gel column chromatography to yield the corresponding  $N^I$ -Aryl pyrazoles **3**.

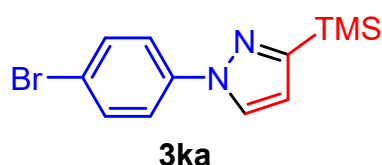

**1-(4-bromophenyl)-3-(trimethylsilyl)-1H-pyrazole (3ka).** For 0.2 mmol scales, the standard procedure was followed to provide **3ka** by column chromatography on silica gel (petroleum ether/EtOAc, 50:1, v/v) as yellow oil (28 mg, 47%). <sup>1</sup>H NMR (600 MHz, Chloroform-*d*) δ 7.90 (d, *J* = 2.4 Hz, 1H), 7.61 (d, *J* = 8.9 Hz, 2H), 7.55 (d, *J* = 8.8 Hz, 2H), 6.57 (d, *J* = 2.4 Hz, 1H), 0.34 (s, 9H). <sup>13</sup>C NMR (151 MHz, Chloroform-*d*) δ 155.7, 139.5, 132.4, 126.8, 121.0, 119.5, 114.0, -1.0. HRMS (ESI-TOF): calcd. for C<sub>12</sub>H<sub>16</sub>N<sub>2</sub>BrSi (M+H): 295.0266, found: *m/z* 295.0262.

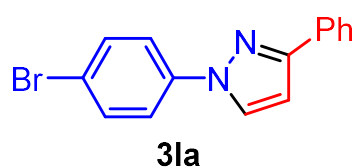

**1-(4-bromophenyl)-3-phenyl-1H-pyrazole (3la).** For 0.2 mmol scales, the standard procedure was followed to provide **3la** by column chromatography on silica gel (petroleum ether/EtOAc, 10:1, v/v) as white solid (19 mg, 33%). M.p.: 124-125°C. <sup>1</sup>H NMR (400 MHz, Chloroform-*d*) δ 7.92 (s, 2H), 7.90 (s, 1H), 7.66 (d, *J* = 8.5 Hz, 2H), 7.58 (d, *J* = 8.7 Hz, 1H), 7.44 (t, *J* = 7.9 Hz, 2H), 7.37 (d, *J* = 6.7 Hz, 1H), 6.78 (d, *J* = 2.1 Hz, 1H). <sup>13</sup>C NMR (101 MHz, Chloroform-*d*) δ 153.3, 139.3, 133.0, 132.5, 128.8, 128.3, 128.0, 126.0, 120.5, 119.5, 105.6. HRMS (ESI-TOF): calcd. for C<sub>15</sub>H<sub>12</sub>N<sub>2</sub>Br (M+H): 299.0184, found: *m/z* 299.0182.

**General procedure for the synthesis of 4-Deuterated *N*<sup>1</sup>-Aryl pyrazoles from the corresponding aryl diazonium salt and allenylboronate.**

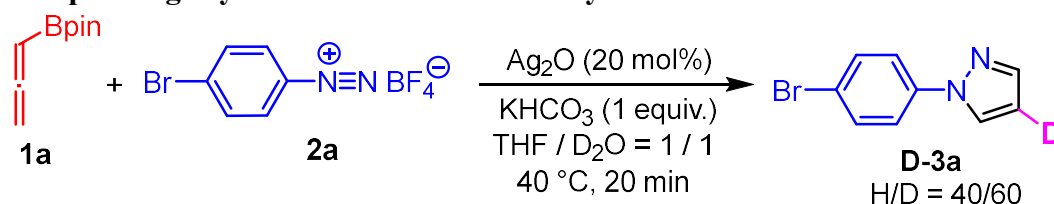

**Deuterium Labeling Experiments:** An oven-dried Schlenk tube equipped with a magnetic stir bar was charged with aryl diazonium salts **2** (0.4 mmol),  $\text{Ag}_2\text{O}$  (20 mol%, 9.2 mg),  $\text{KHCO}_3$  (1.0 equiv., 20 mg), then THF (1 mL) and  $\text{D}_2\text{O}$  (2 mL) were added. After that, allenylboronate **1a** (1.0 equiv., 0.2 mmol) was added in 1 mL of THF slowly in 3 minutes. The resulting mixture was allowed to stir at 40 °C in Argon atmosphere for 20 minutes. Then the mixture was filtered through a Celite plug, rinsed with ethyl acetate. The resulting clear organic solution was concentrated under reduced pressure, and the residue was further purified by a silica gel column chromatography to yield the corresponding 4-Deuterated *N*<sup>1</sup>-Aryl pyrazoles **D-3a**. The H/D ratios of the product was determined by  $^1\text{H}$  NMR analysis. (H/D = 40/60)

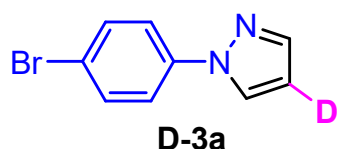

$^1\text{H}$  NMR (600 MHz, Chloroform-*d*)  $\delta$  7.89 (d,  $J$  = 4.7 Hz, 1H), 7.72 (d,  $J$  = 3.5 Hz, 1H), 7.66 – 7.39 (m, 4H), 6.48 (d,  $J$  = 3.3 Hz, 0.4H).

# NMR Spectra

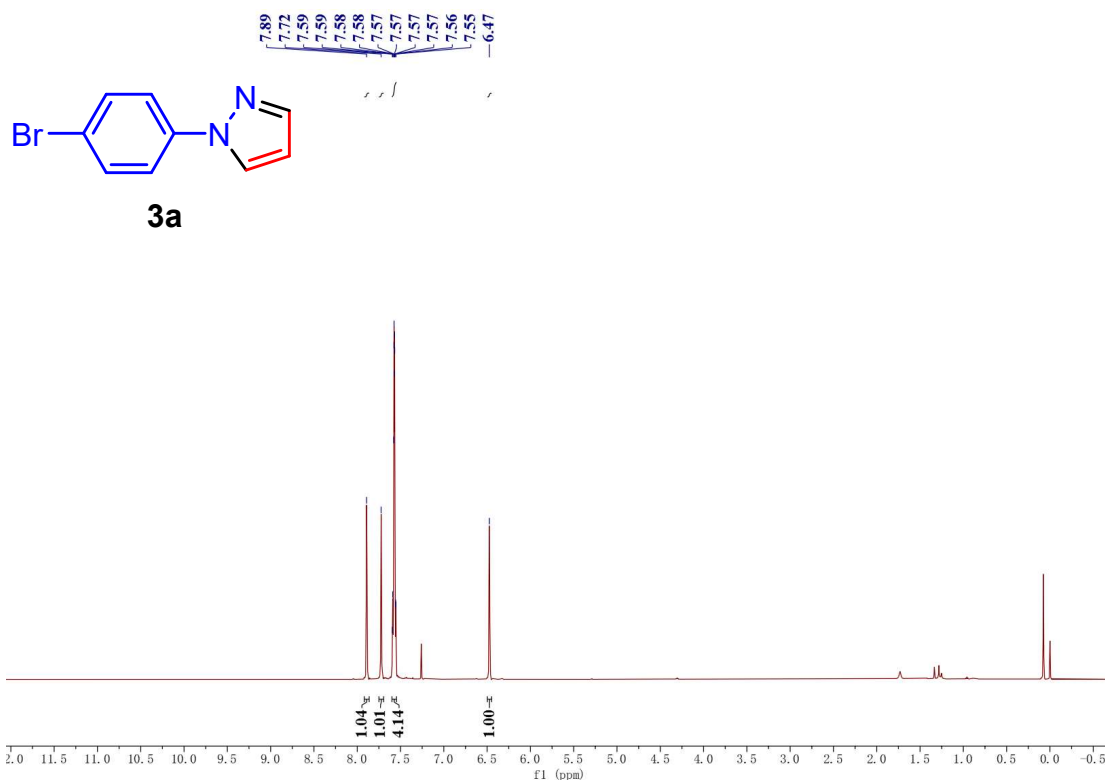

<sup>1</sup>H NMR (600 MHz, Chloroform-*d*) spectrum of **3a**

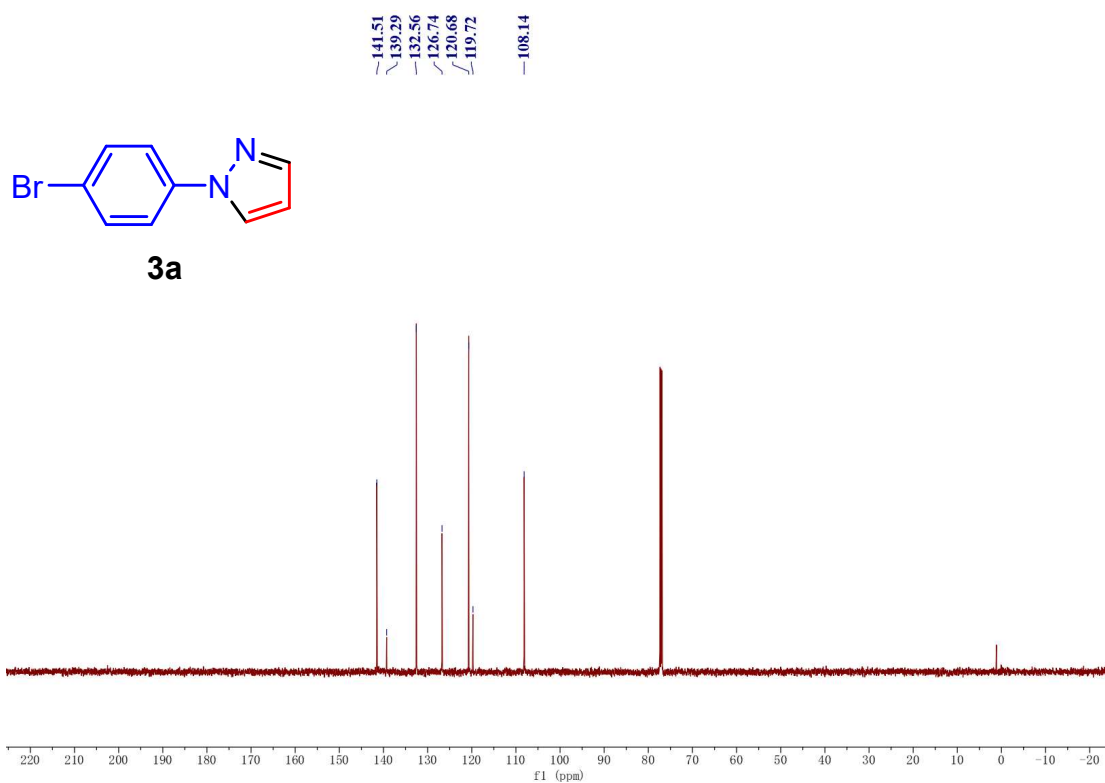

<sup>13</sup>C NMR (151 MHz, Chloroform-*d*) spectrum of **3a**

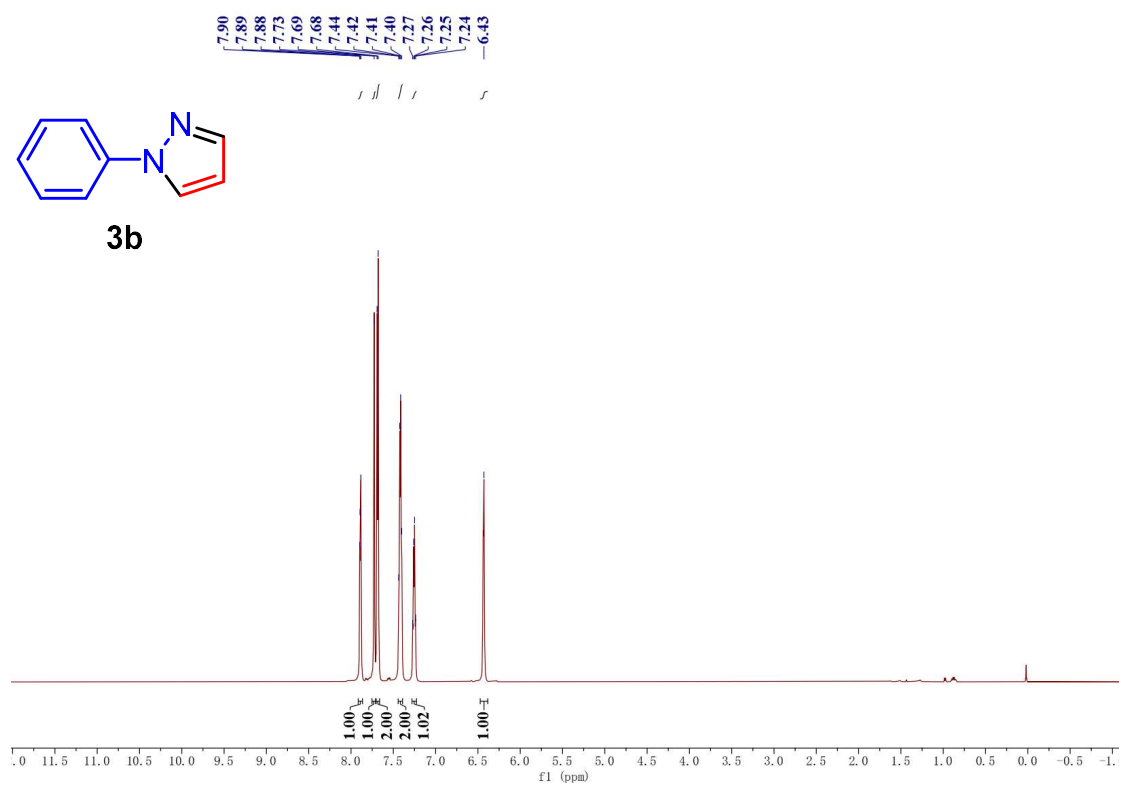

<sup>1</sup>H NMR (600 MHz, Chloroform-*d*) spectrum of **3b**

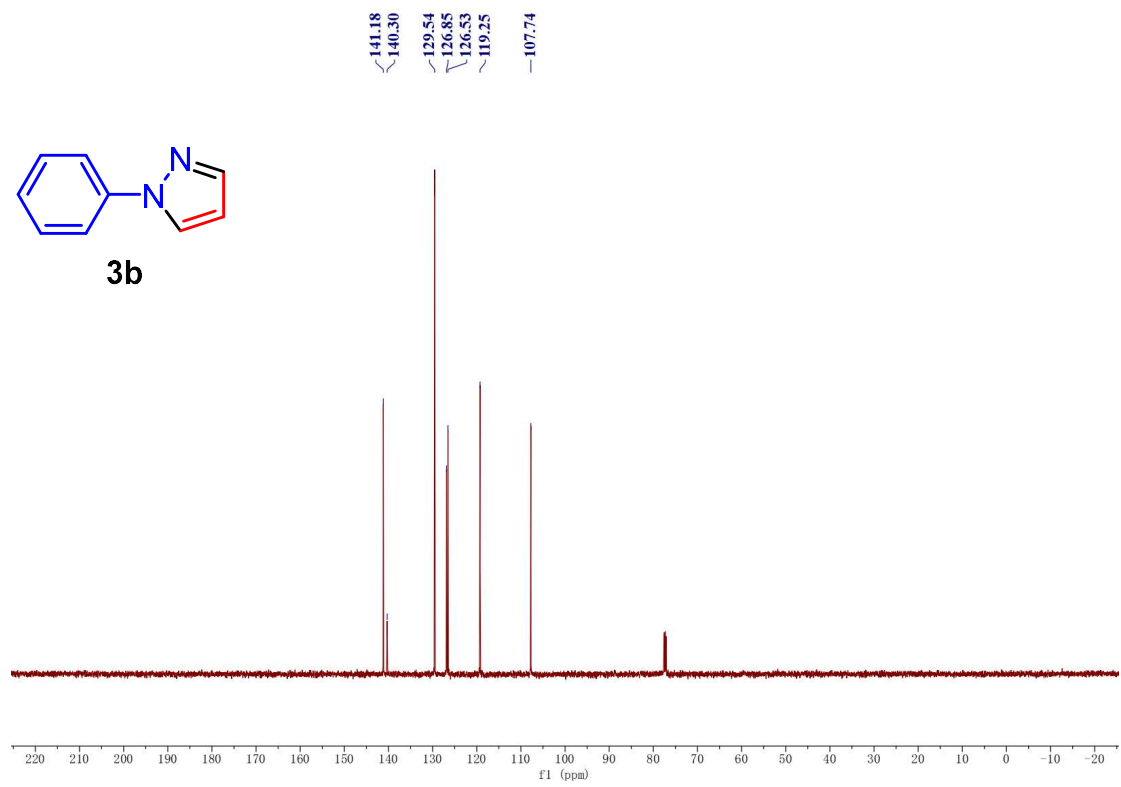

<sup>13</sup>C NMR (151 MHz, Chloroform-*d*) spectrum of **3b**



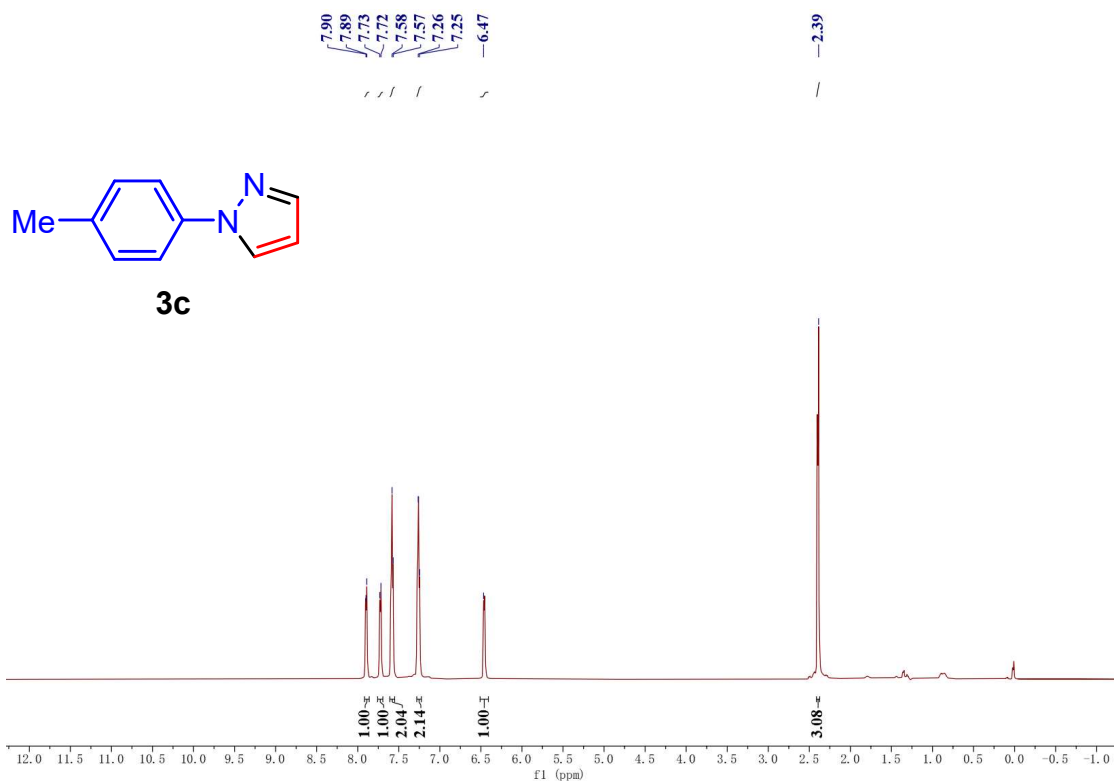

$^1\text{H}$  NMR (600 MHz, Chloroform-*d*) spectrum of **3c**

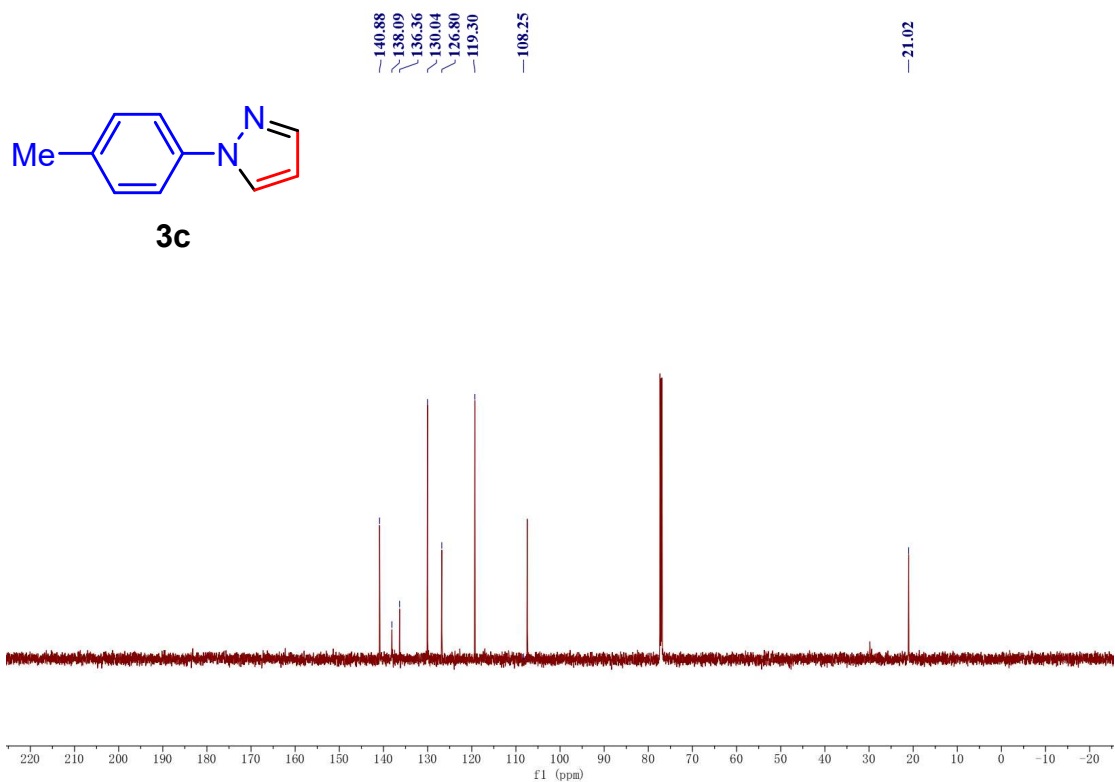

$^{13}\text{C}$  NMR (151 MHz, Chloroform-*d*) spectrum of **3c**

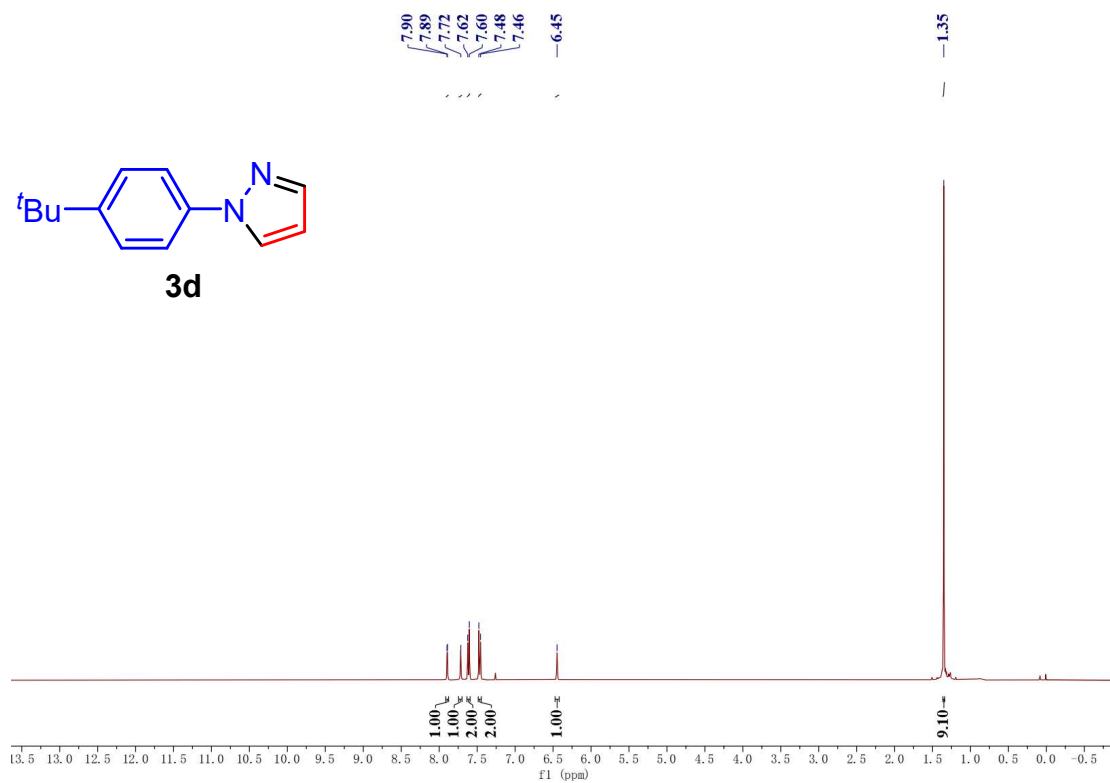

<sup>1</sup>H NMR (400 MHz, Chloroform-*d*) spectrum of **3d**

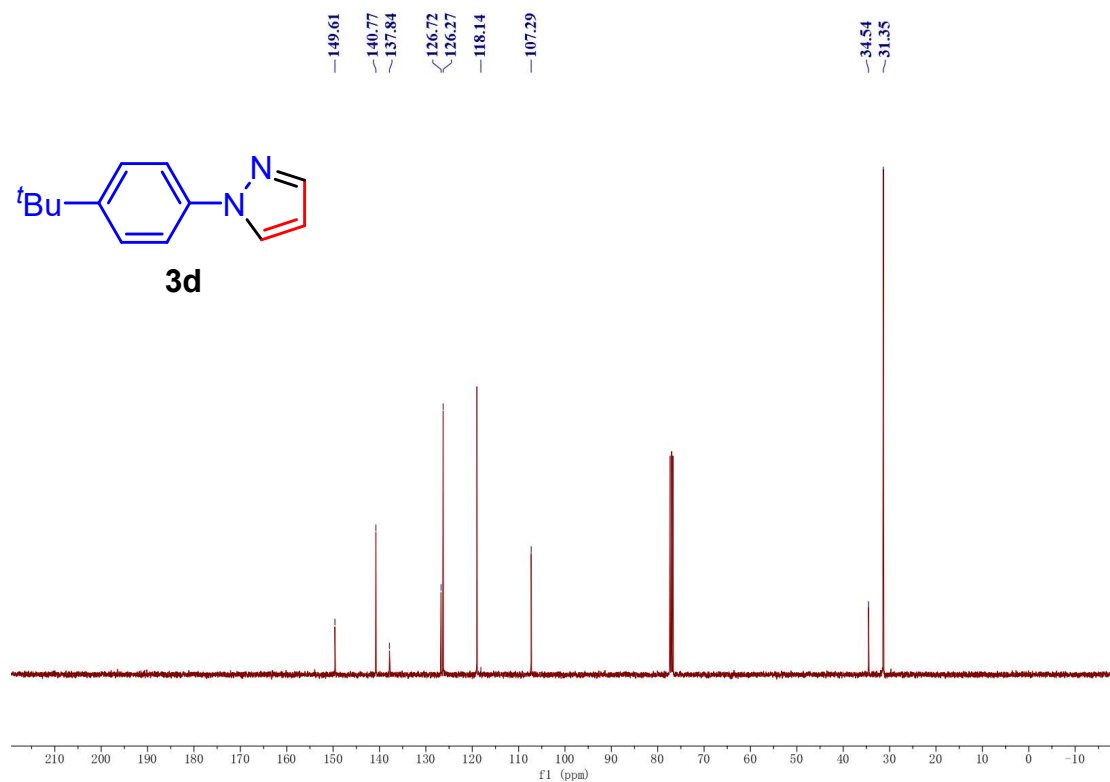

<sup>13</sup>C NMR (101 MHz, Chloroform-*d*) spectrum of **3d**

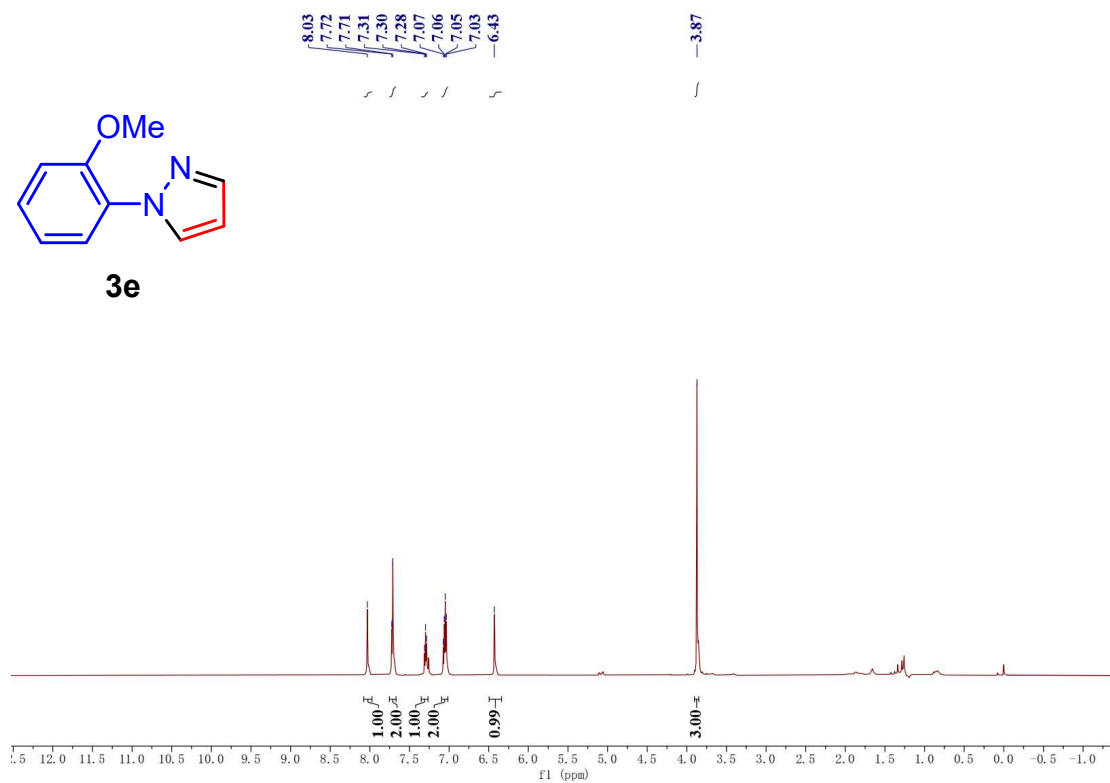

<sup>1</sup>H NMR (600 MHz, Chloroform-*d*) spectrum of **3e**

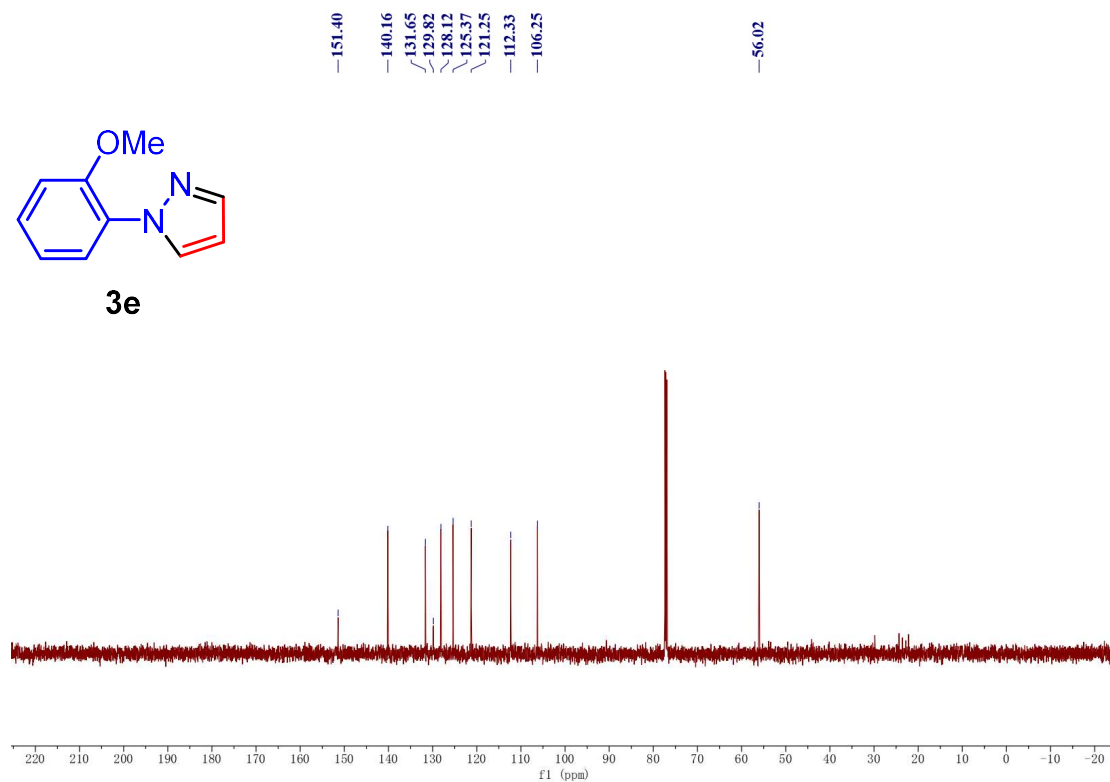

<sup>13</sup>C NMR (151 MHz, Chloroform-*d*) spectrum of **3e**

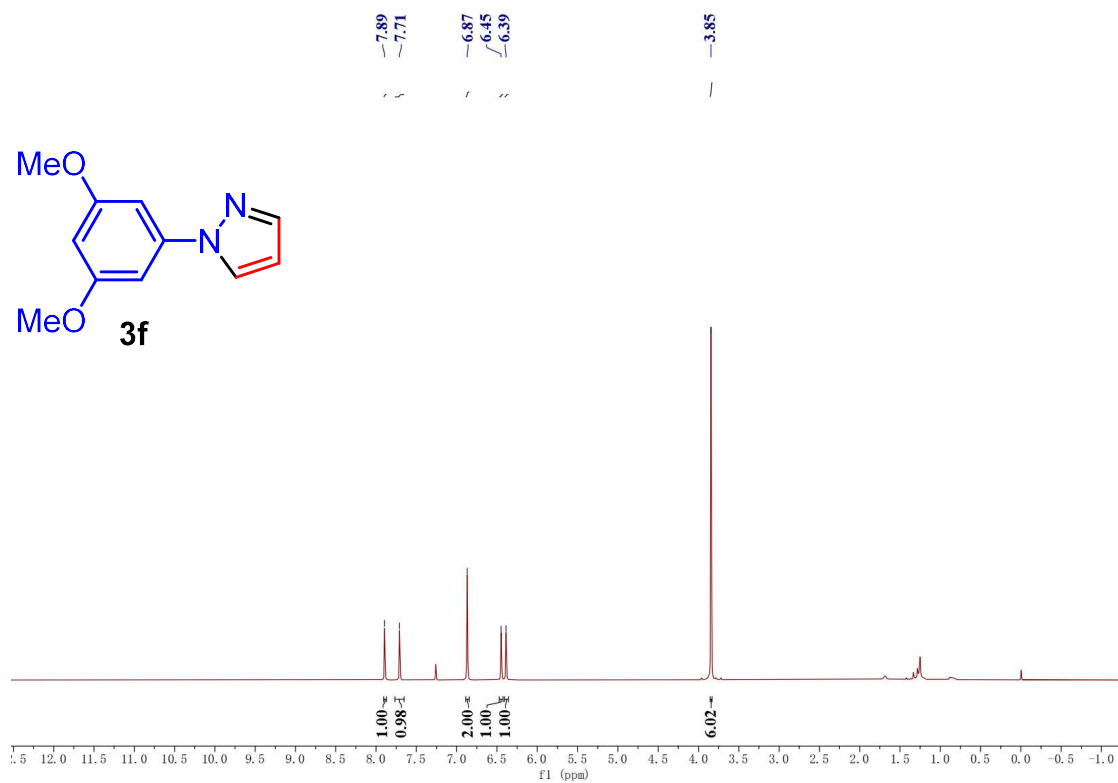

$^1\text{H NMR}$  (600 MHz, Chloroform-*d*) spectrum of **3f**

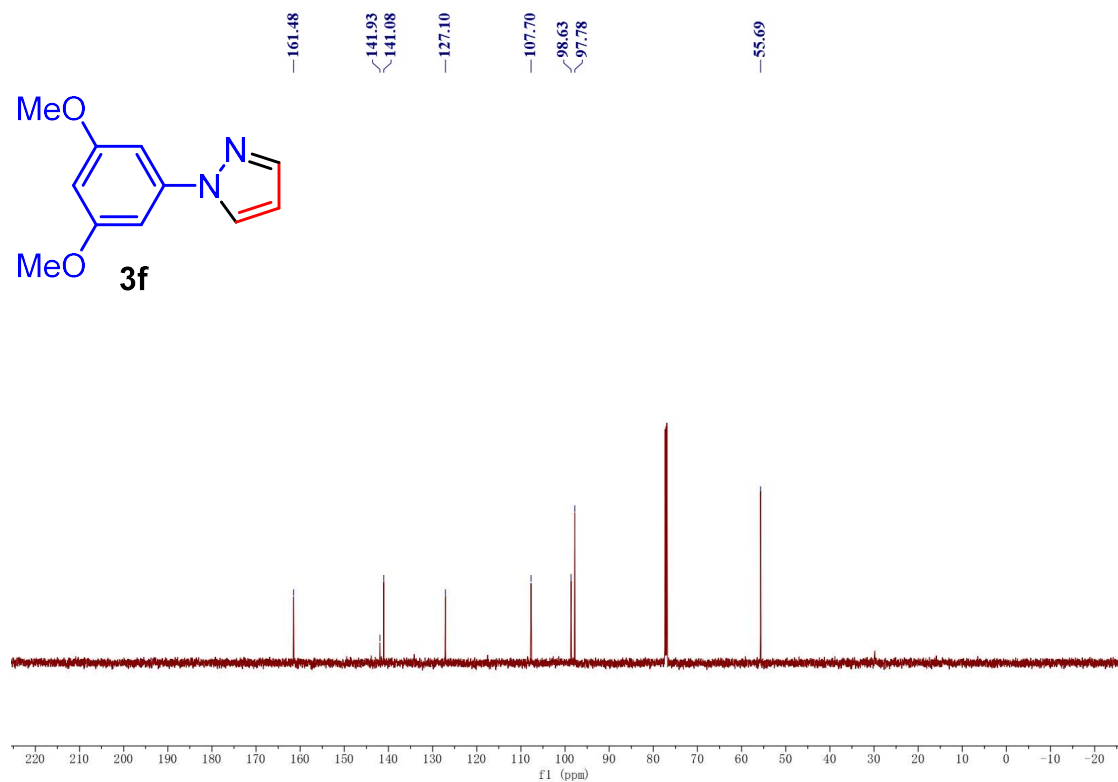

$^{13}\text{C NMR}$  (151 MHz, Chloroform-*d*) spectrum of **3f**

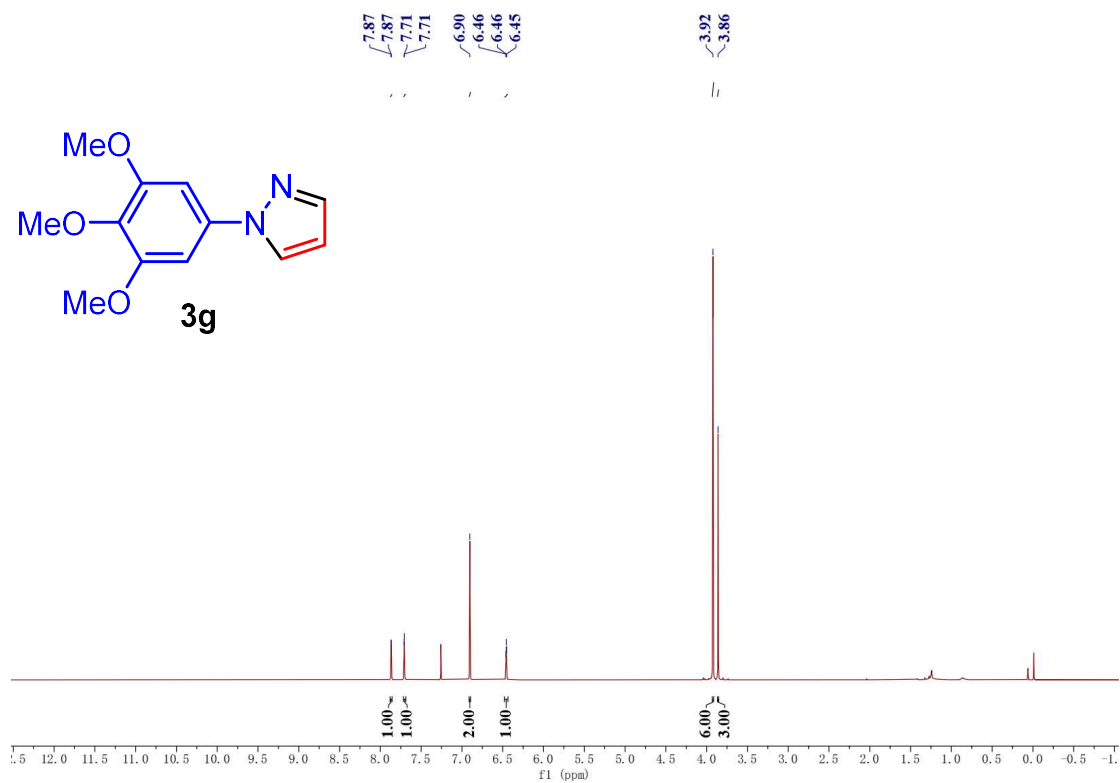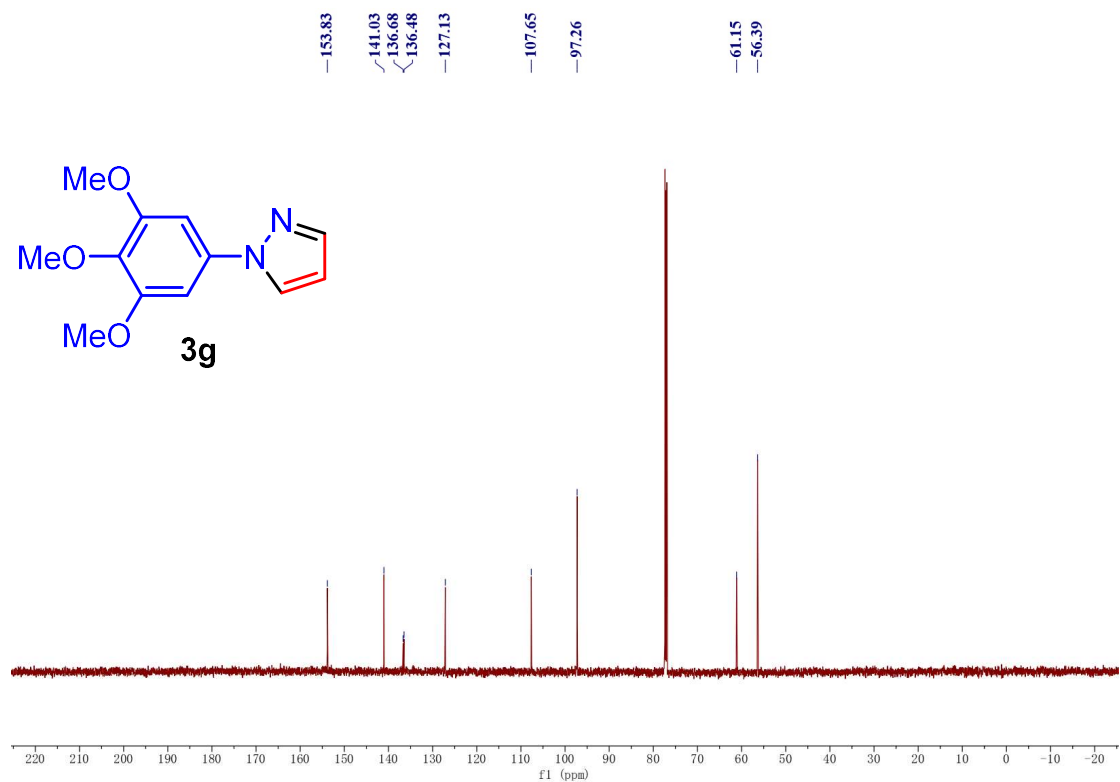

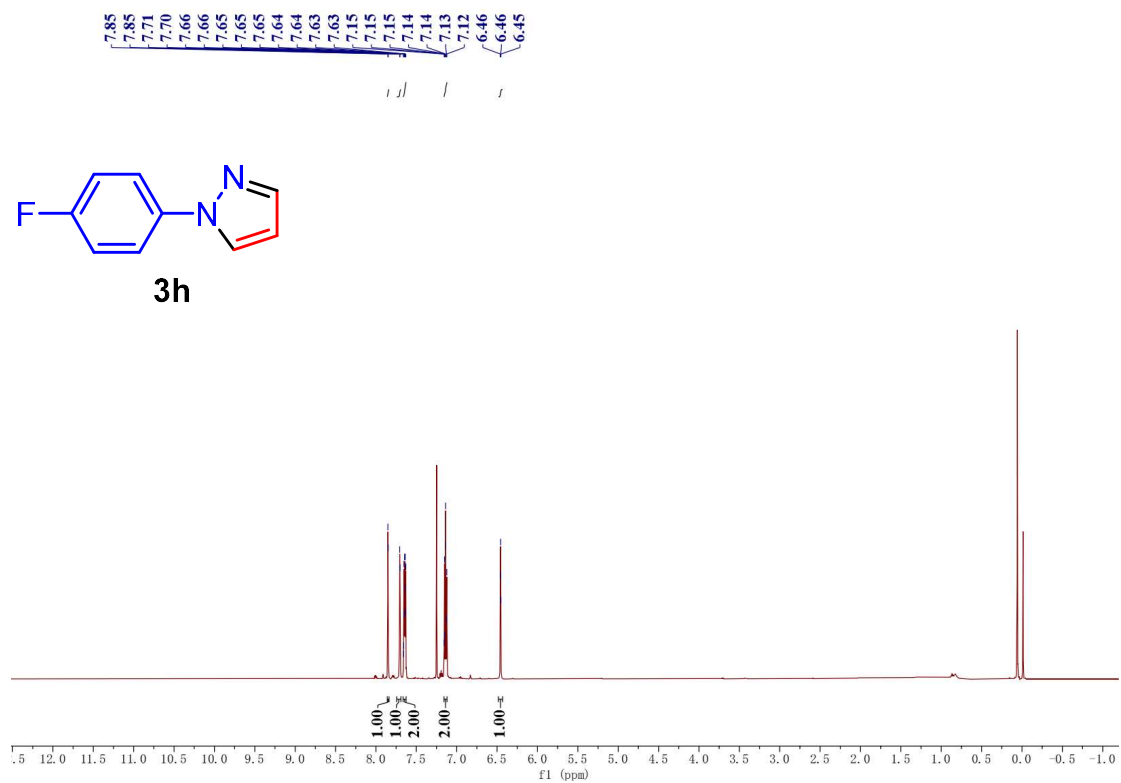

<sup>1</sup>H NMR (600 MHz, Chloroform-*d*) spectrum of **3h**

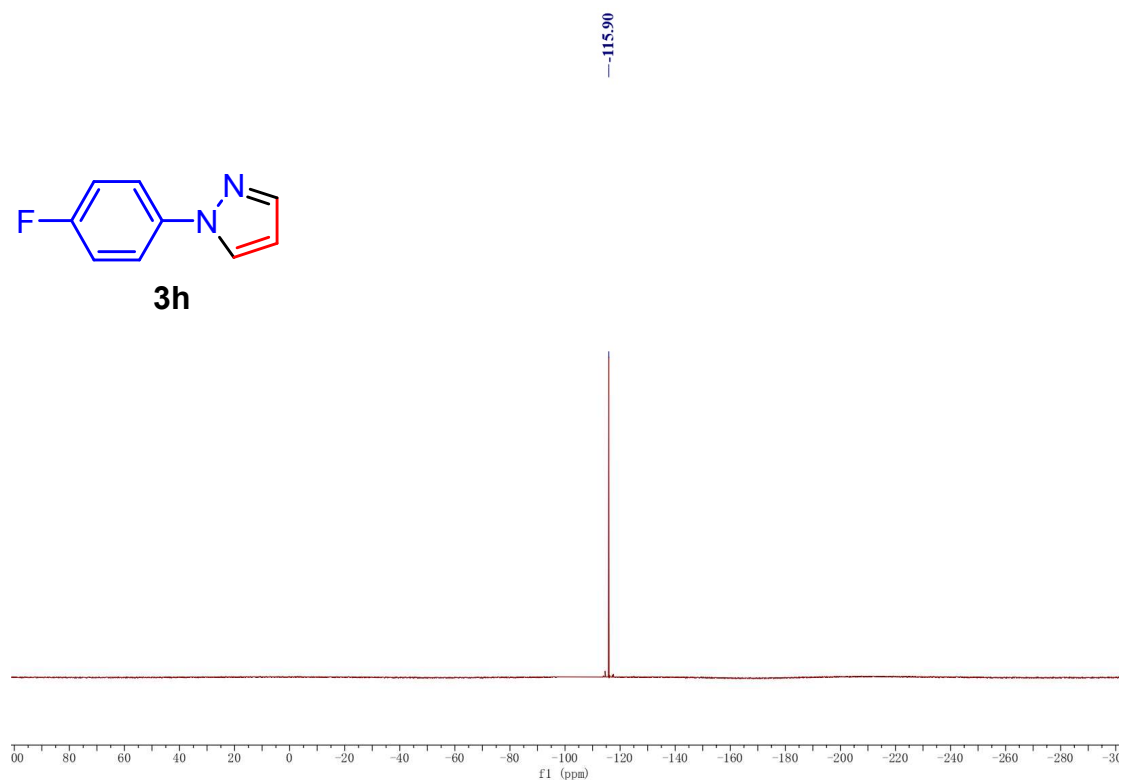

<sup>19</sup>F NMR (565 MHz, Chloroform-*d*) spectrum of **3h**

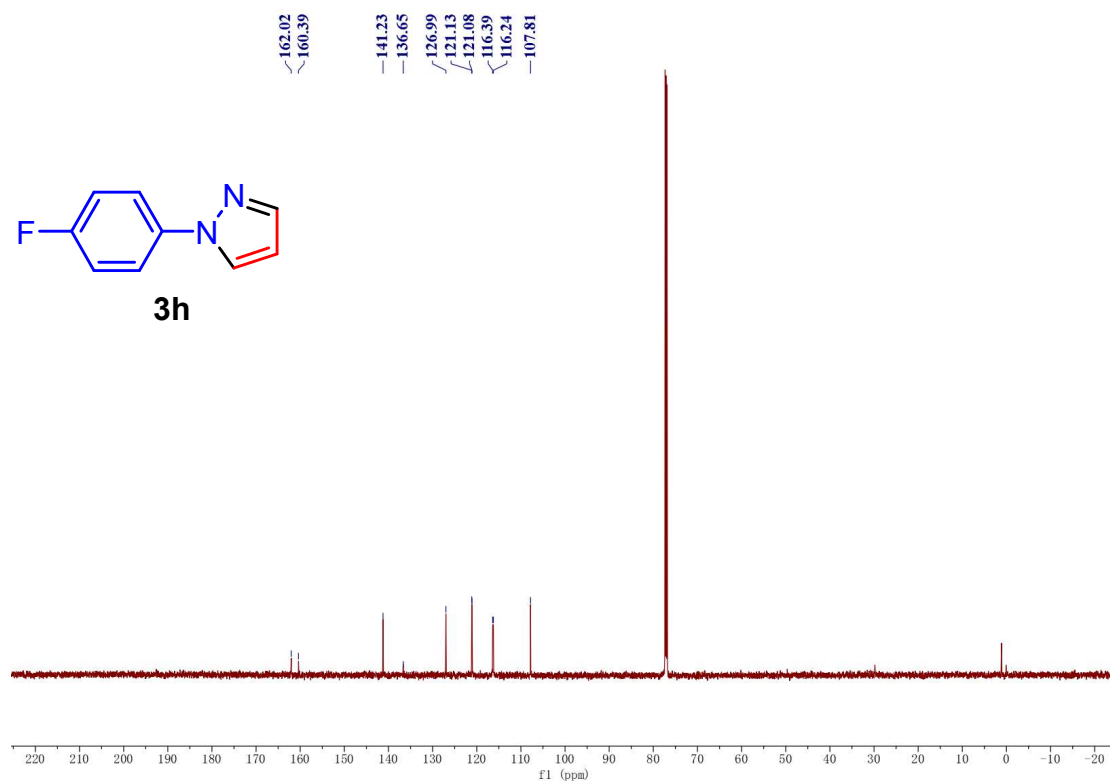

$^{13}\text{C}$  NMR (151 MHz, Chloroform-*d*) spectrum of **3h**

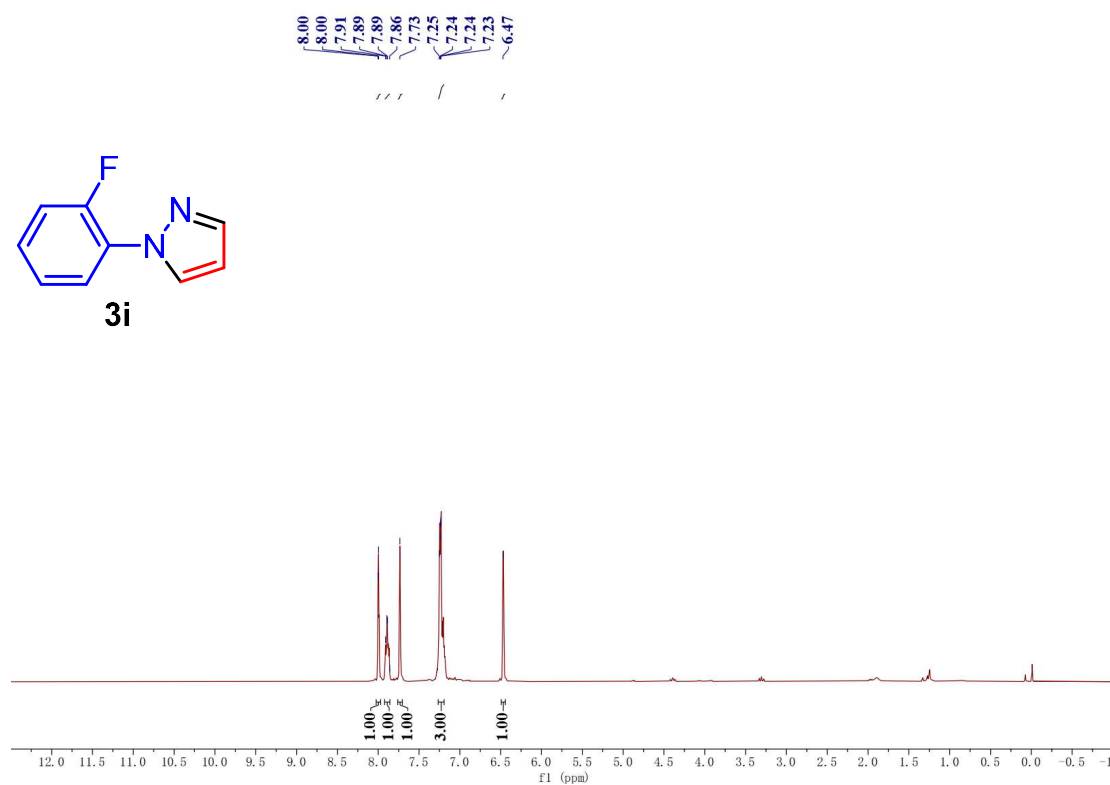

$^1\text{H}$  NMR (400 MHz, Chloroform-*d*) spectrum of **3i**

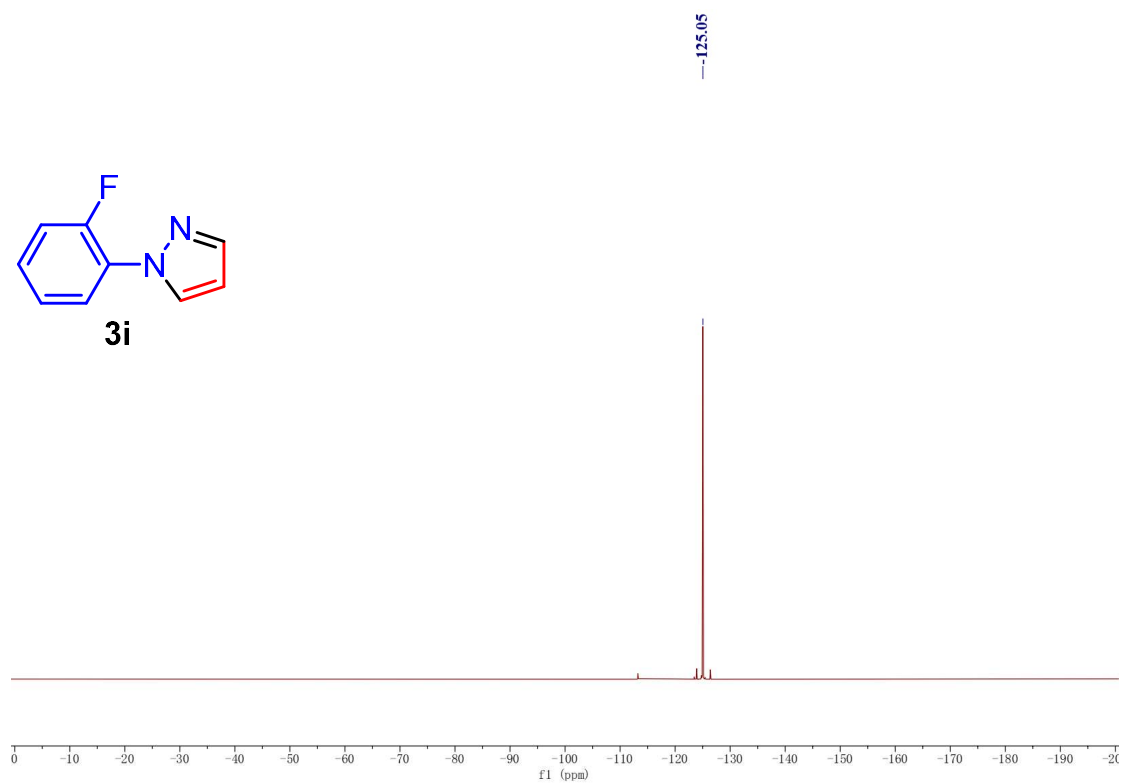

$^{19}\text{F}$  NMR (376 MHz, Chloroform-*d*) spectrum of **3i**

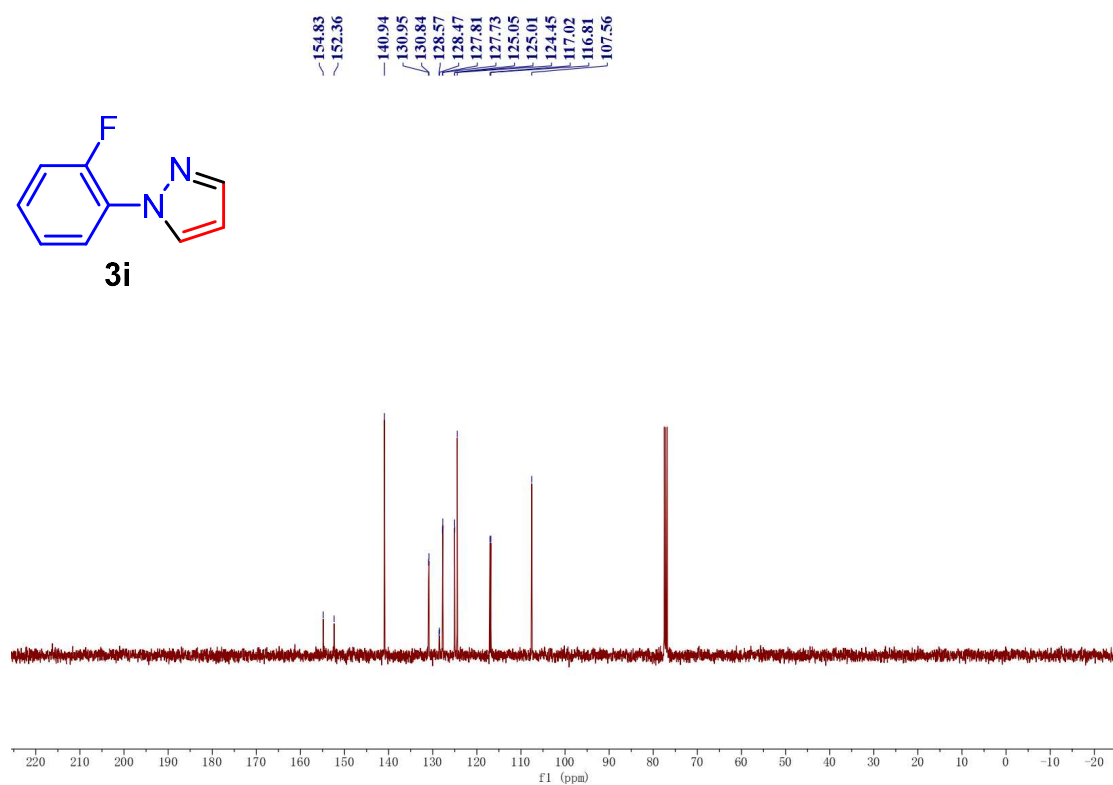

$^{13}\text{C}$  NMR (101 MHz, Chloroform-*d*) spectrum of **3i**



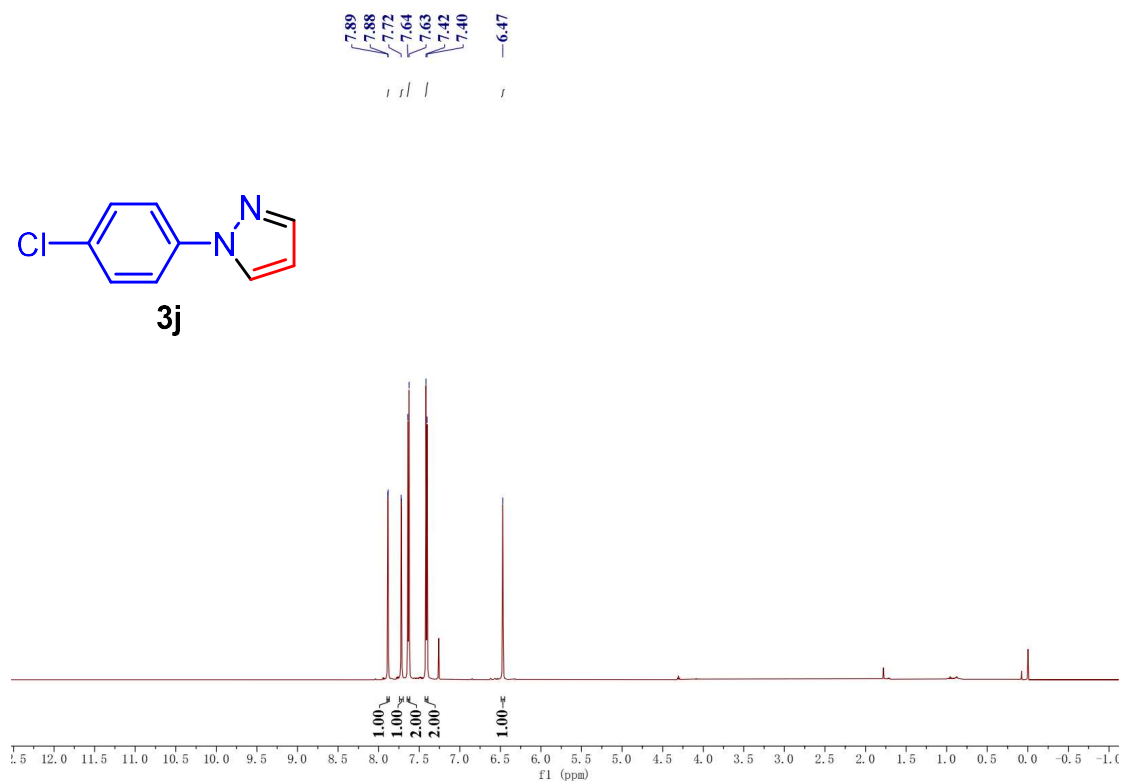

**<sup>1</sup>H NMR (600 MHz, Chloroform-*d*) spectrum of **3j****

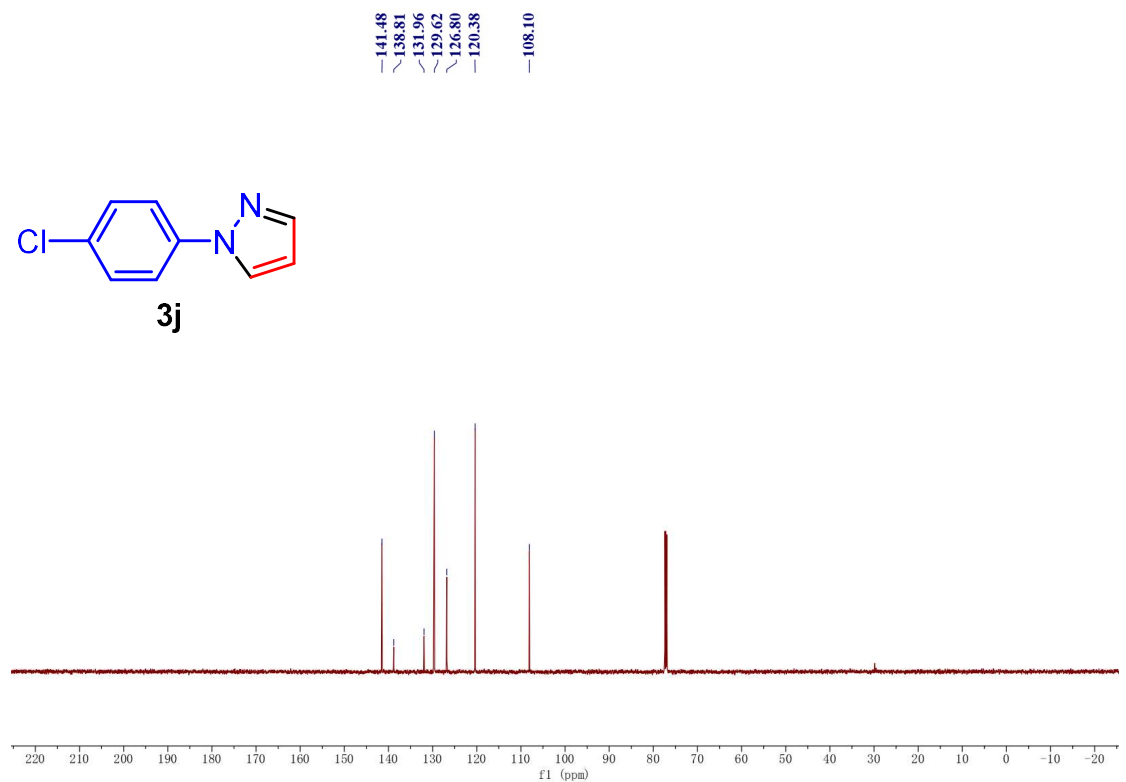

**<sup>13</sup>C NMR (151 MHz, Chloroform-*d*) spectrum of **3j****

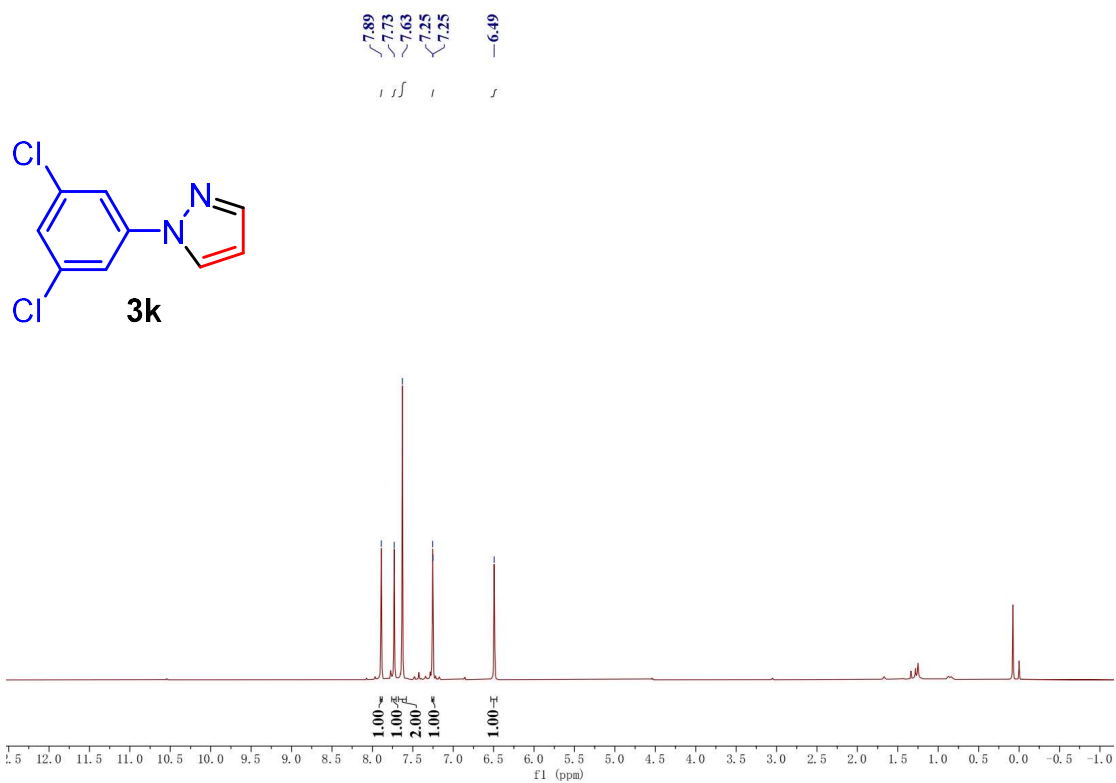

**<sup>1</sup>H NMR (600 MHz, Chloroform-*d*) spectrum of 3k**

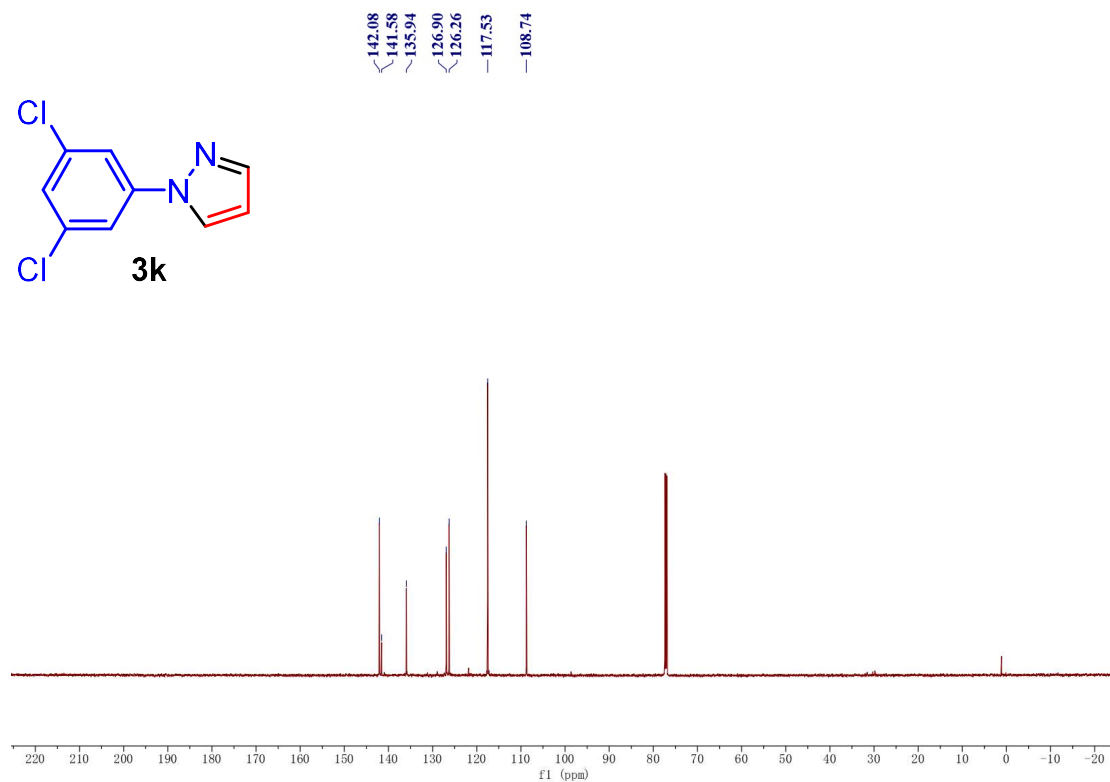

**<sup>13</sup>C NMR (151 MHz, Chloroform-*d*) spectrum of 3k**

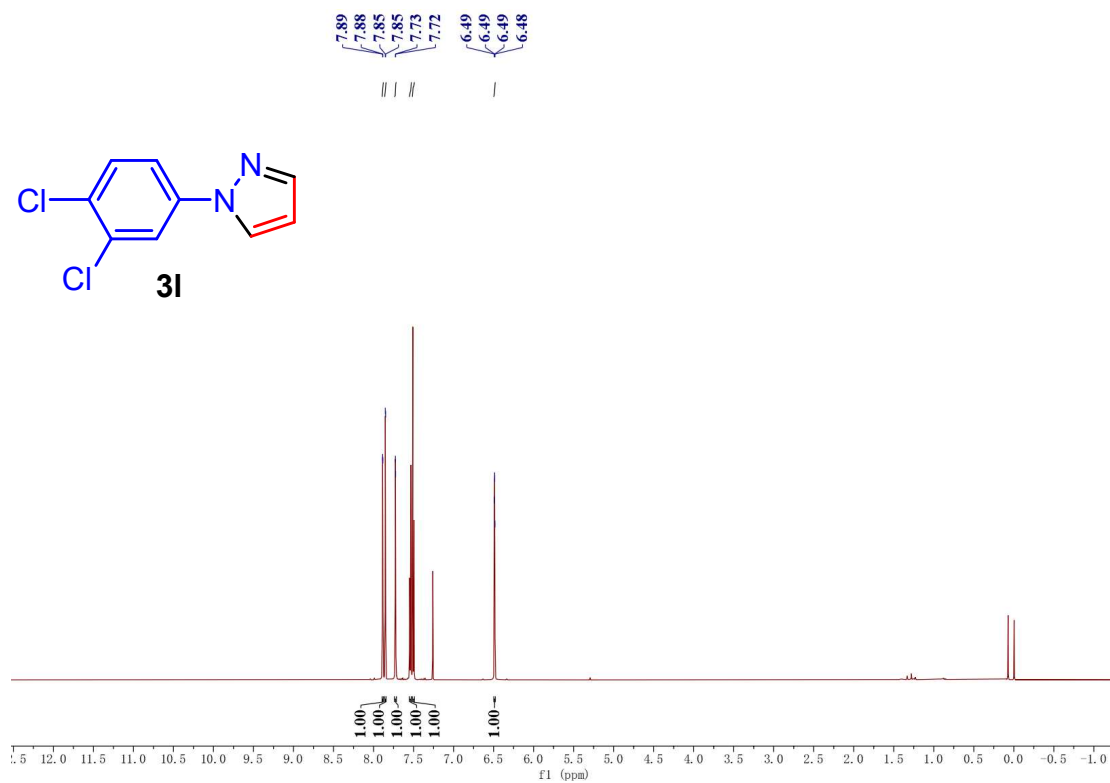

<sup>1</sup>H NMR (600 MHz, Chloroform-*d*) spectrum of **3I**

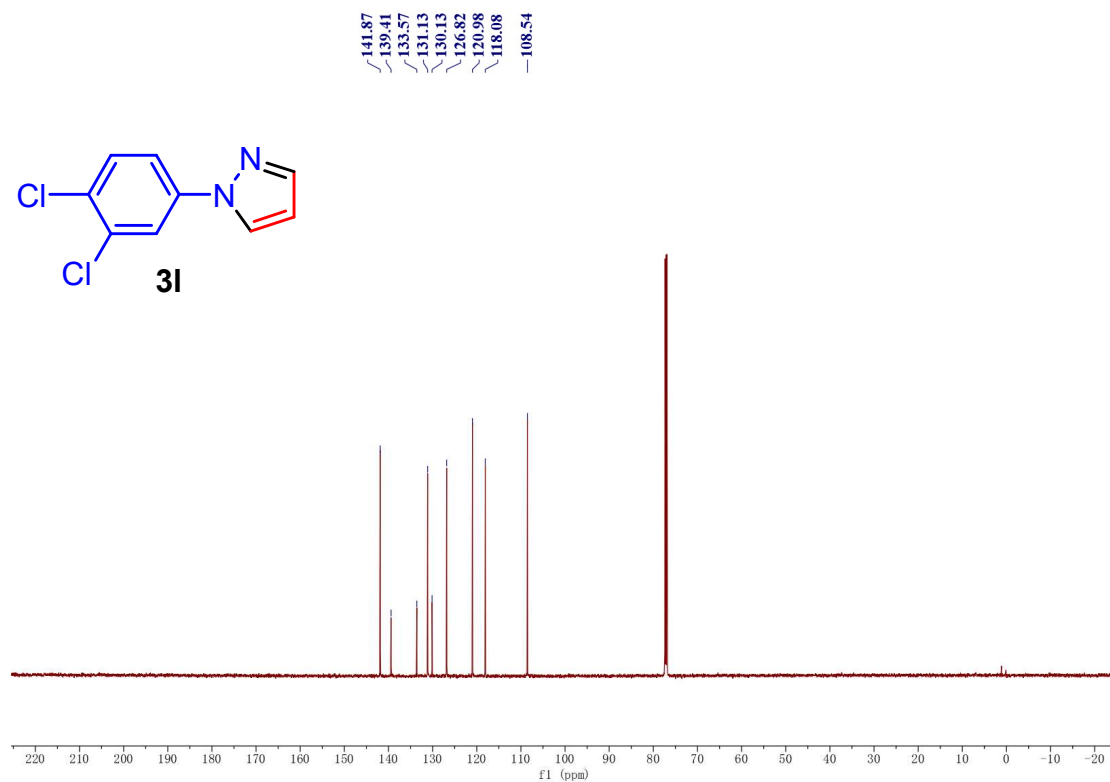

<sup>13</sup>C NMR (151 MHz, Chloroform-*d*) spectrum of **3I**

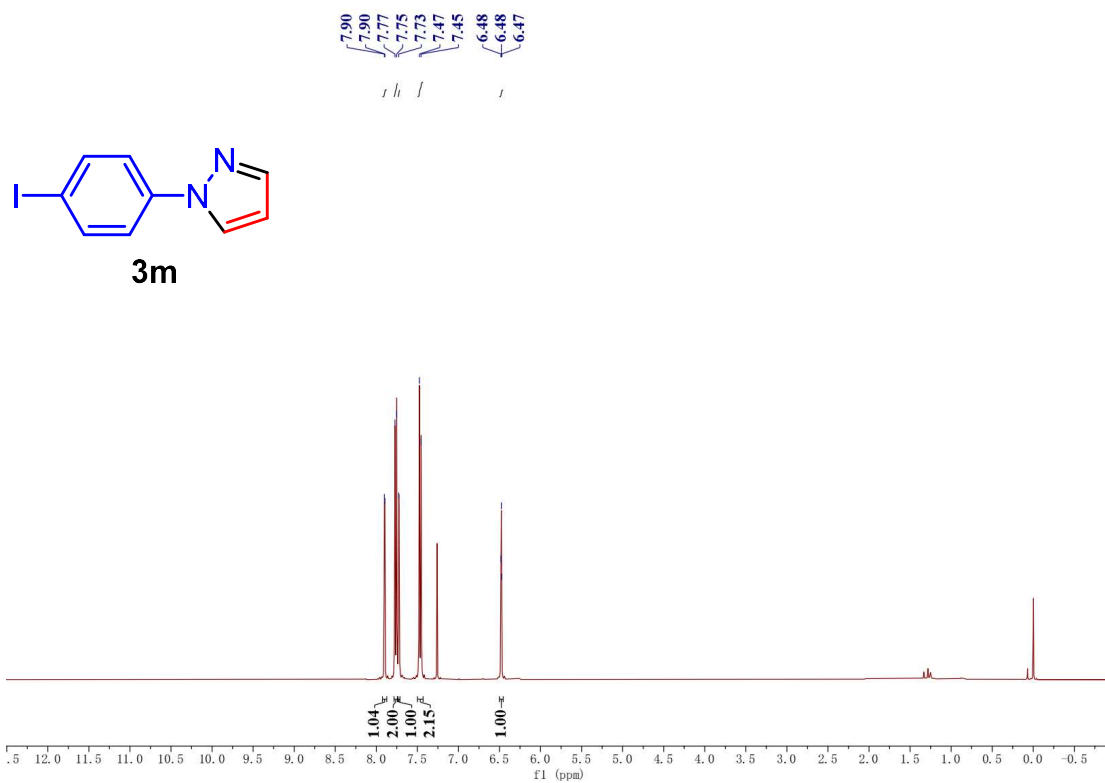

**$^1\text{H}$  NMR (400 MHz, Chloroform-*d*) spectrum of **3m****

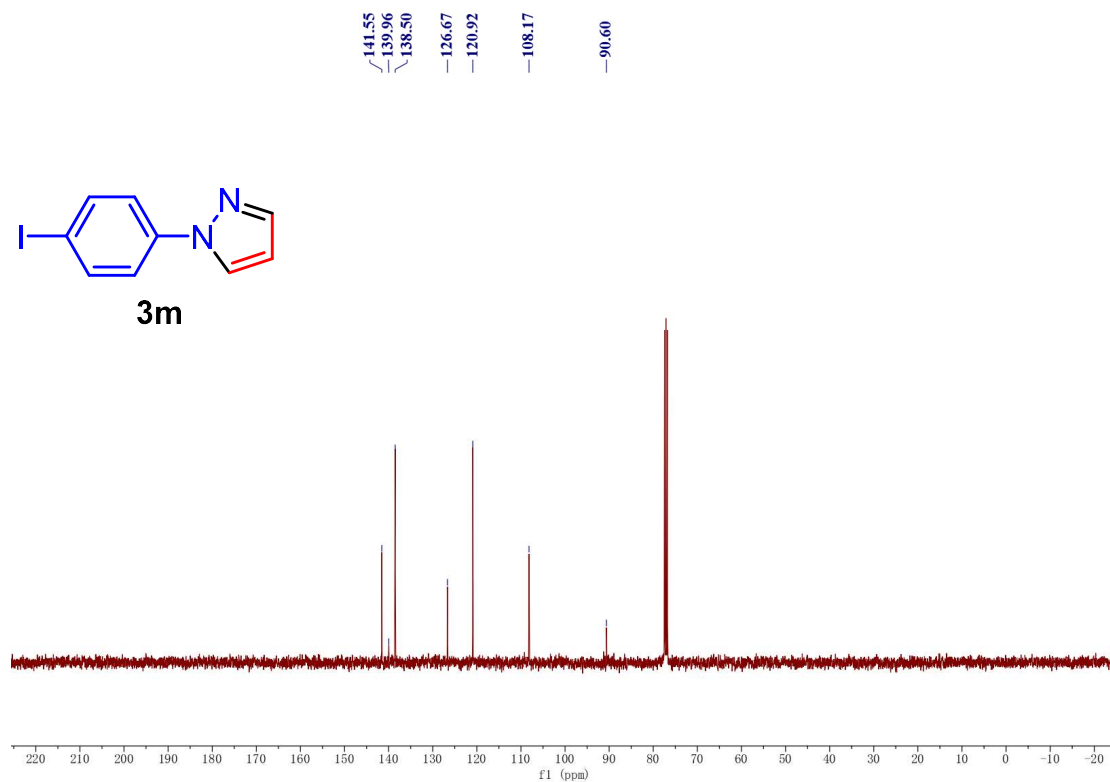

**$^{13}\text{C}$  NMR (101 MHz, Chloroform-*d*) spectrum of **3m****

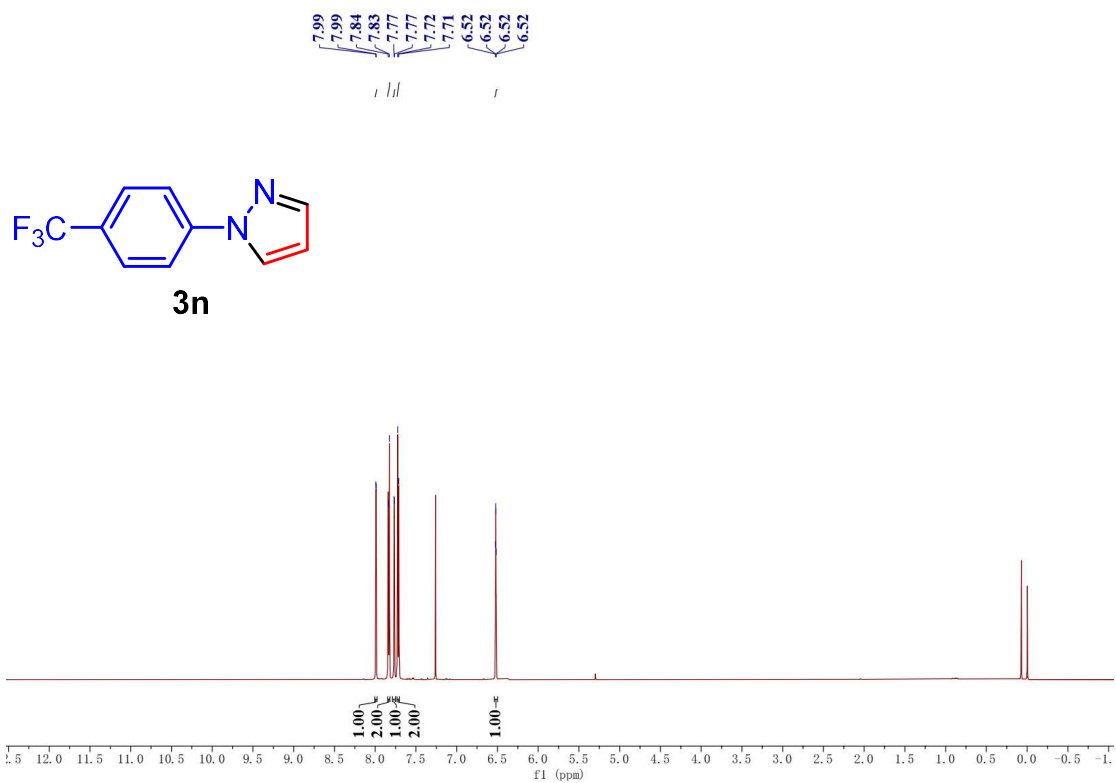

**<sup>1</sup>H NMR (600 MHz, Chloroform-*d*) spectrum of 3n**

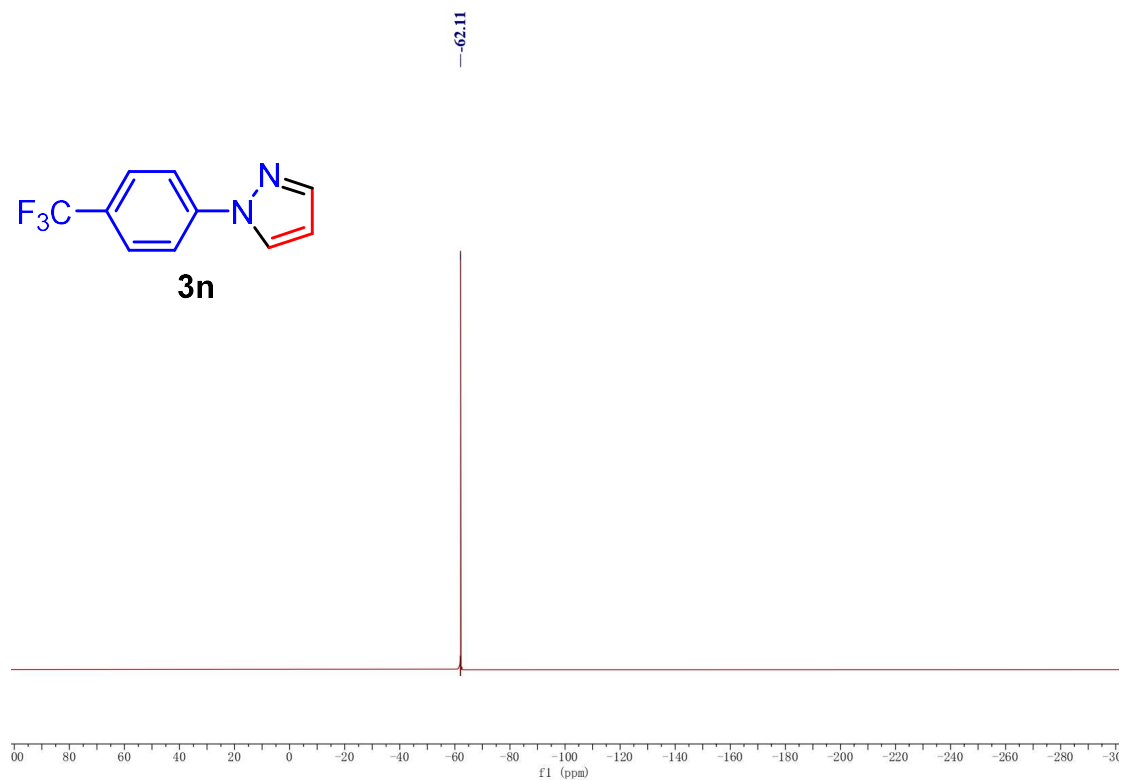

**<sup>19</sup>F NMR (565 MHz, Chloroform-*d*) spectrum of 3n**

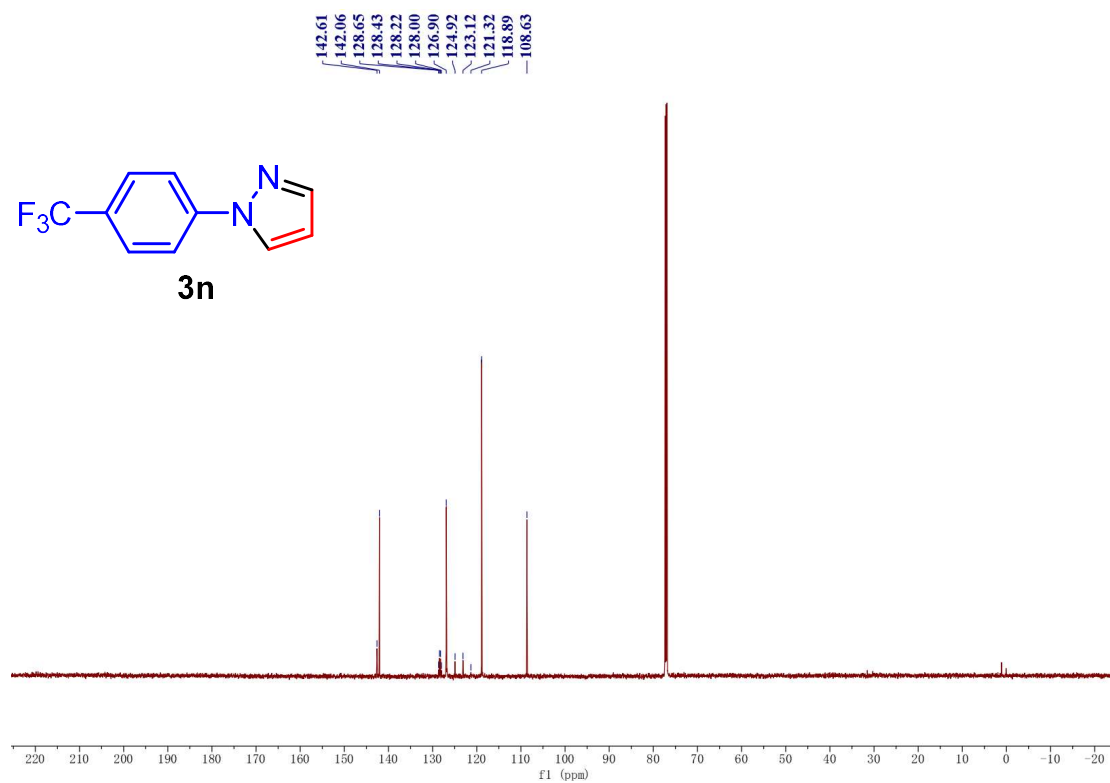

<sup>13</sup>C NMR (151 MHz, Chloroform-*d*) spectrum of **3n**

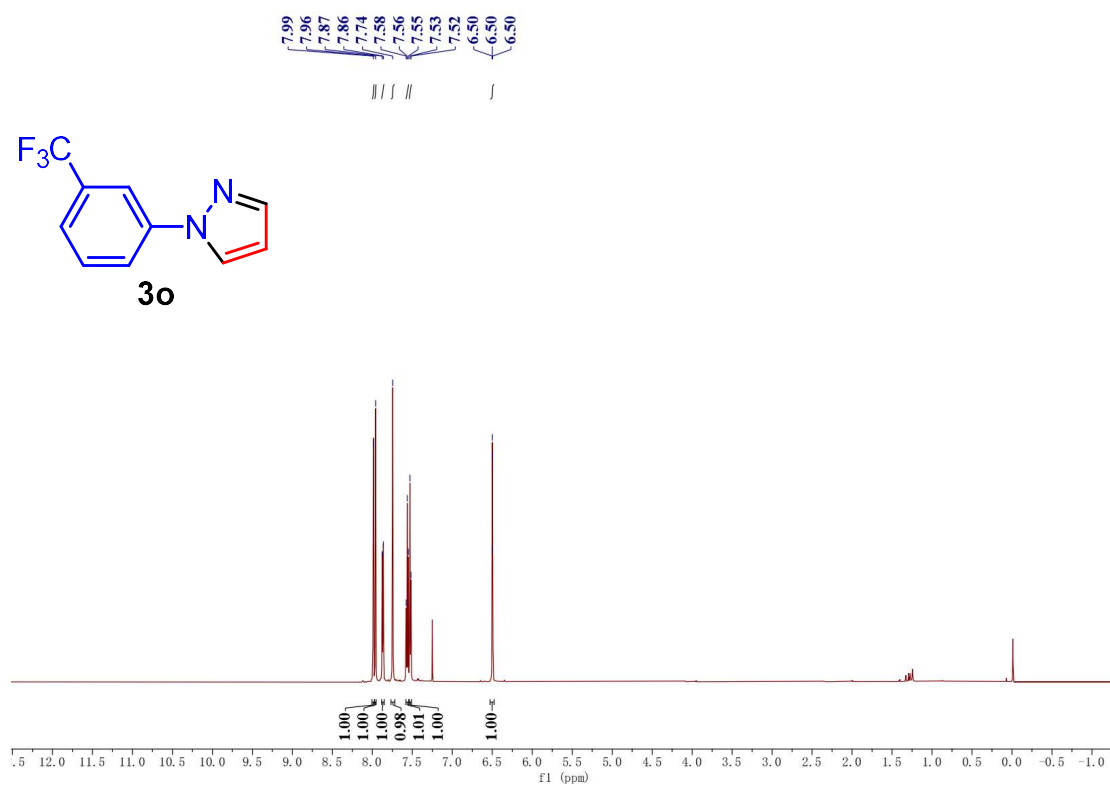

<sup>1</sup>H NMR (600 MHz, Chloroform-*d*) spectrum of **3o**

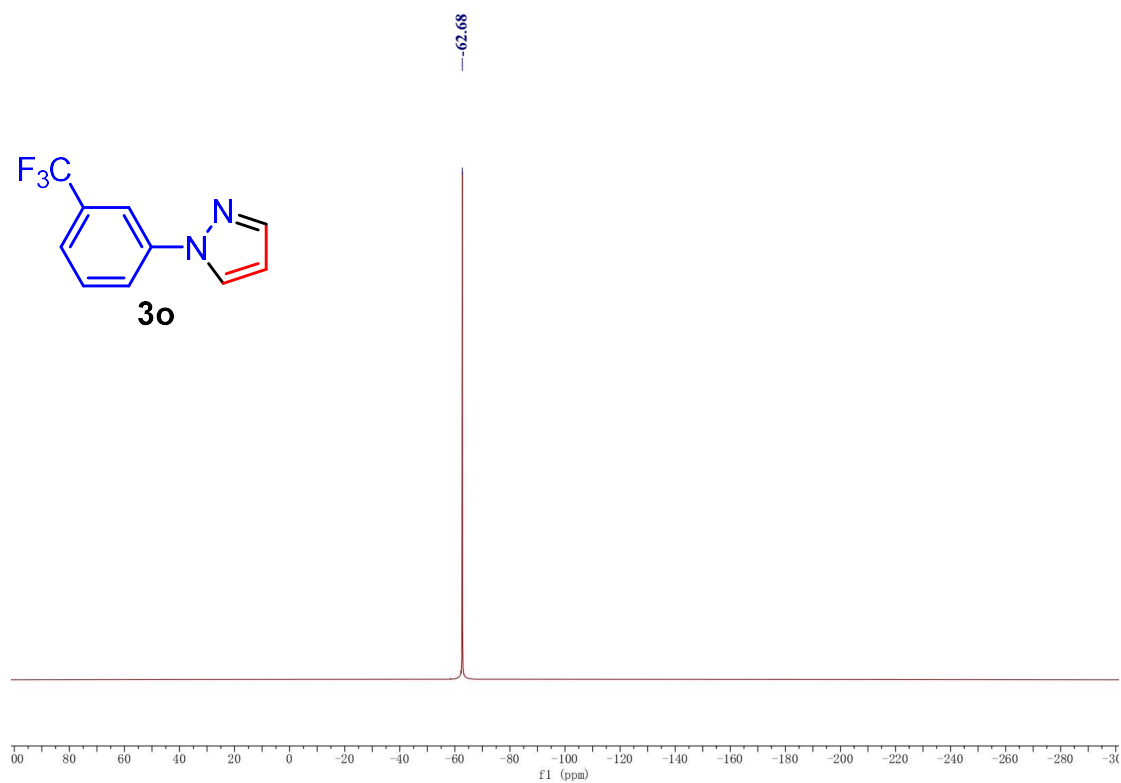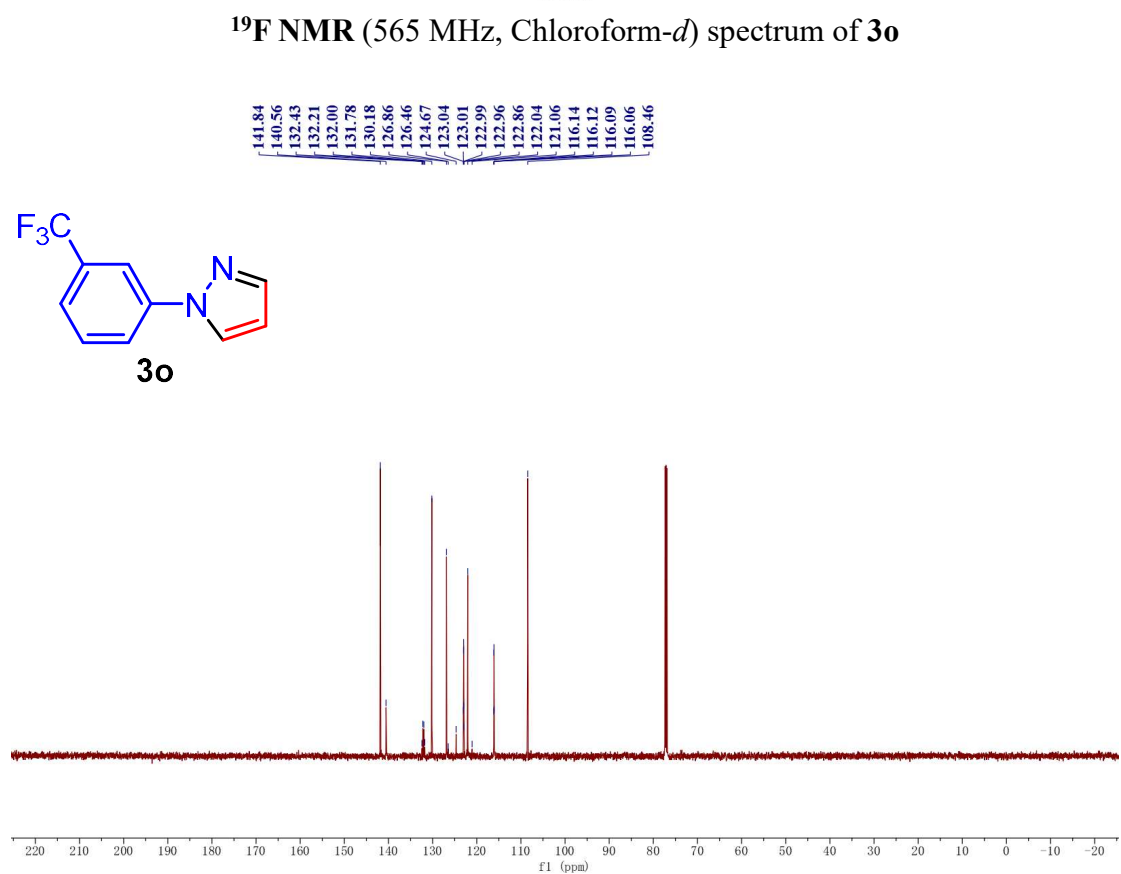

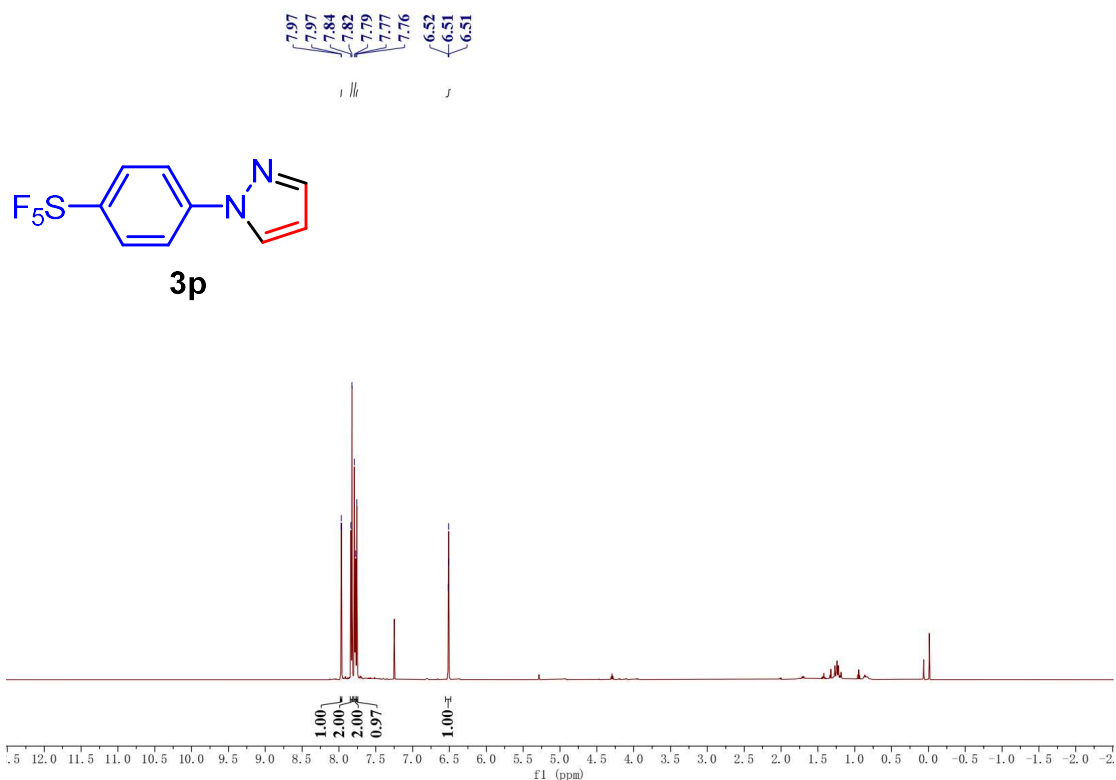

**<sup>1</sup>H NMR (600 MHz, Chloroform-*d*) spectrum of 3p**

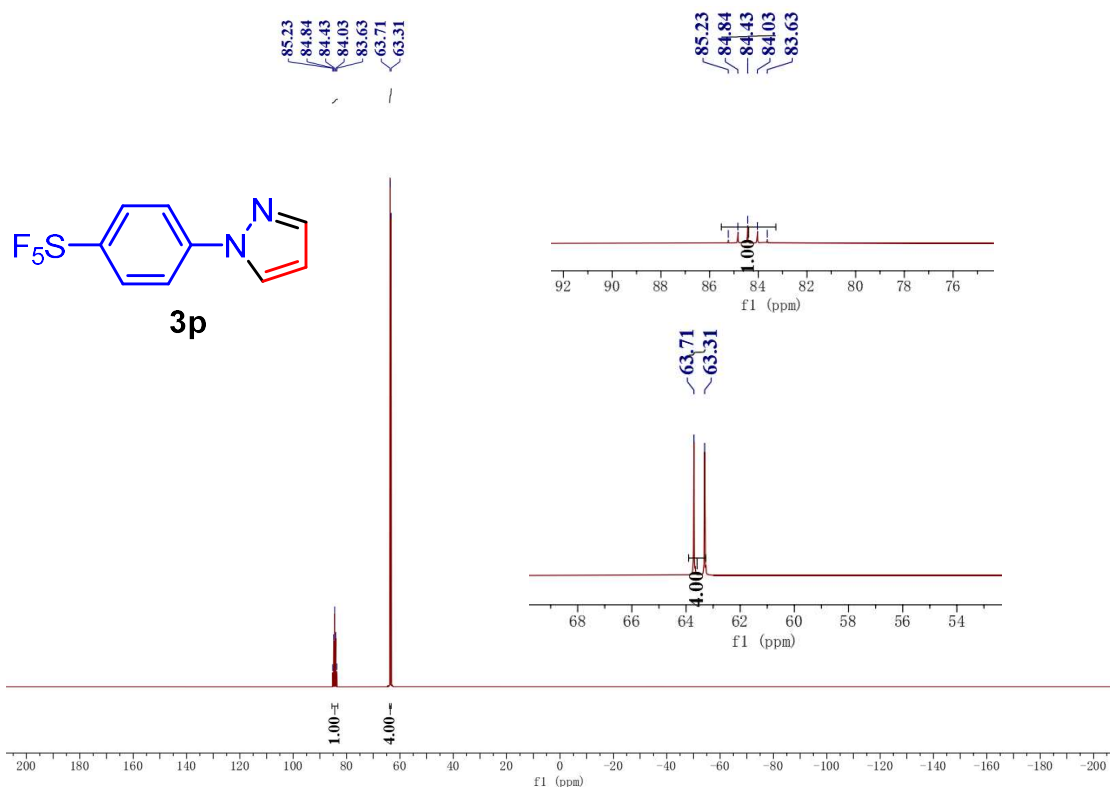

**<sup>19</sup>F NMR (565 MHz, Chloroform-*d*) spectrum of 3p**



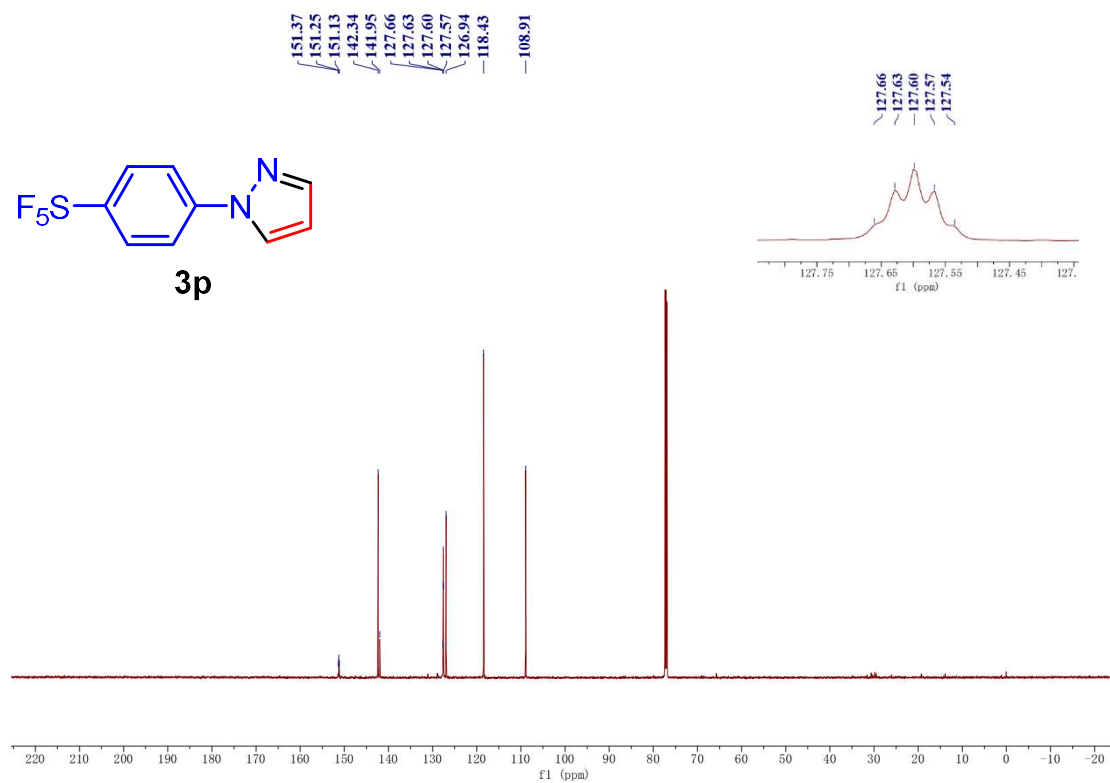

<sup>13</sup>C NMR (151 MHz, Chloroform-*d*) spectrum of **3p**

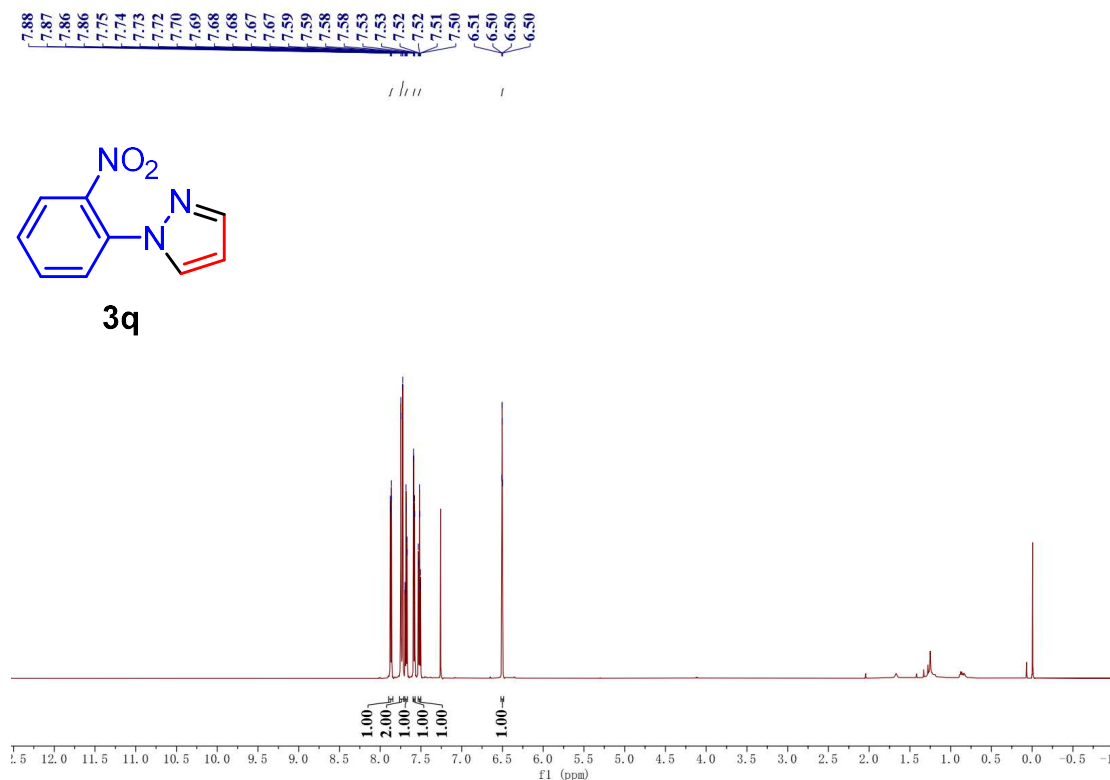

<sup>1</sup>H NMR (600 MHz, Chloroform-*d*) spectrum of **3q**

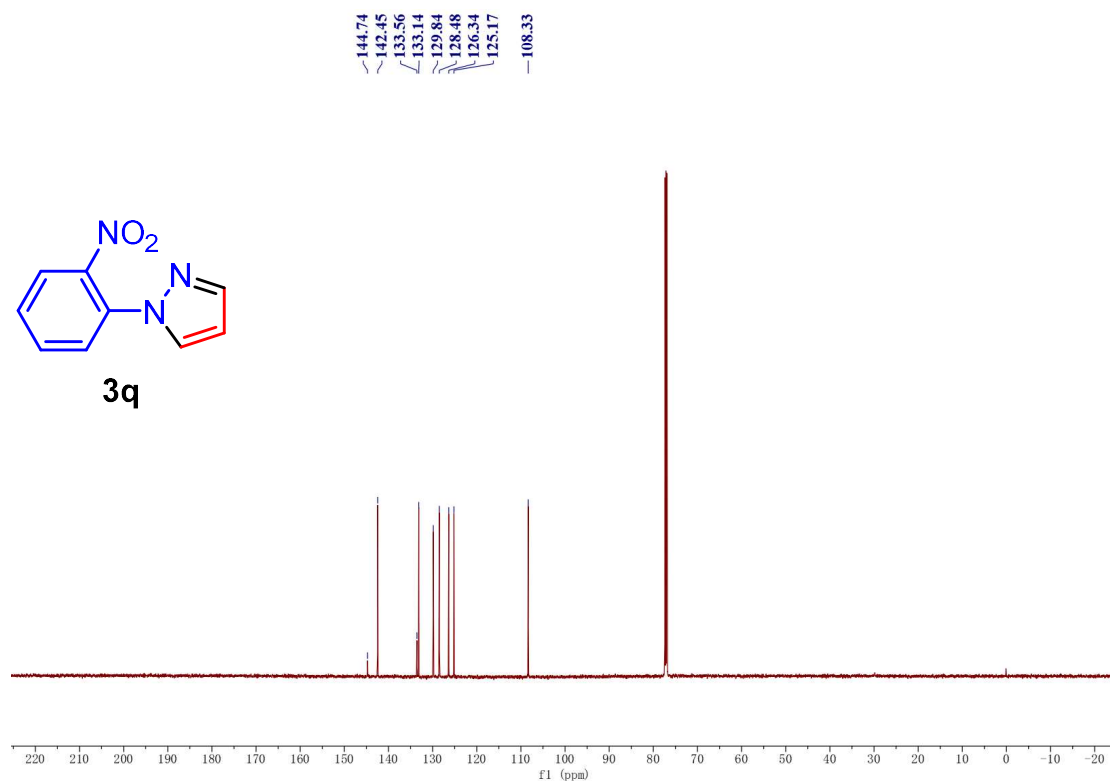

<sup>13</sup>C NMR (151 MHz, Chloroform-*d*) spectrum of **3q**

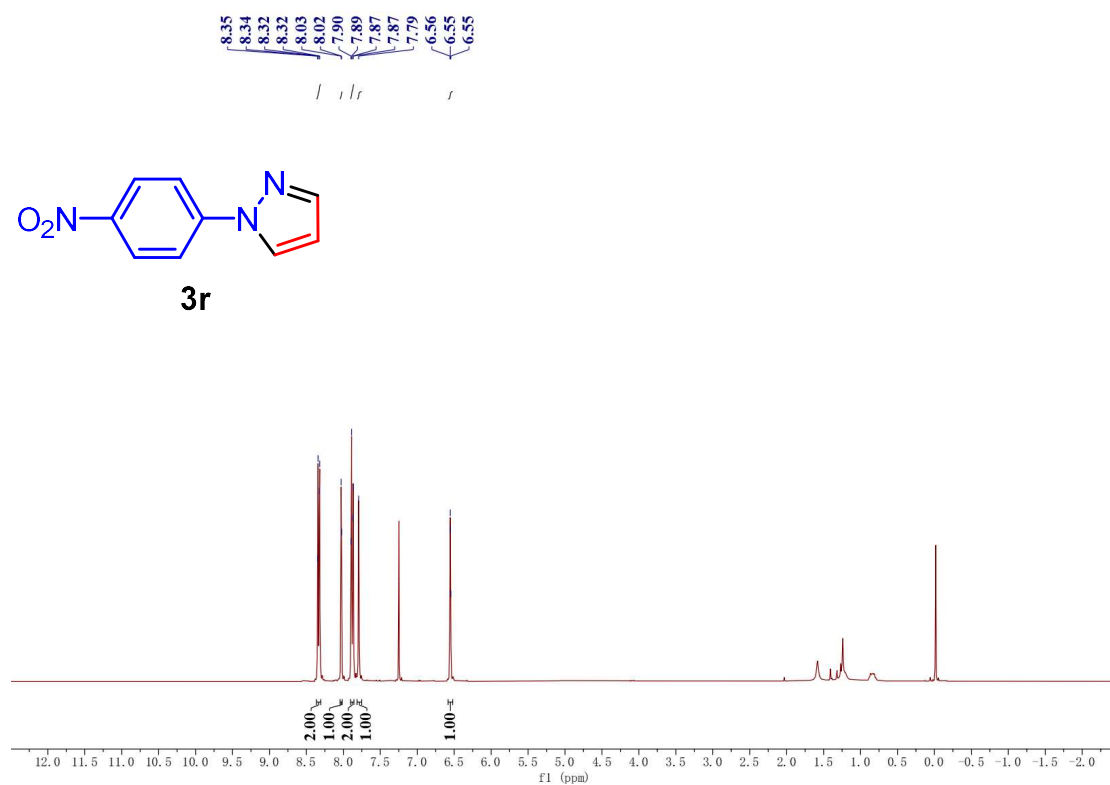

<sup>1</sup>H NMR (400 MHz, Chloroform-*d*) spectrum of **3r**

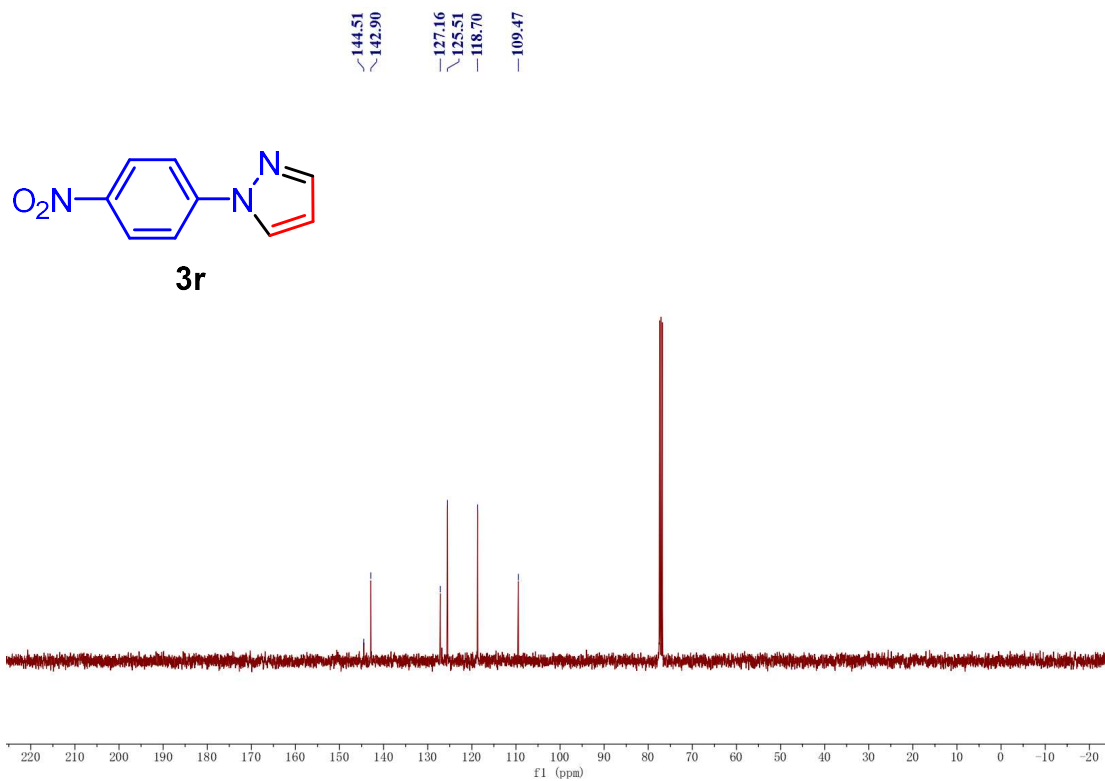

**$^{13}\text{C}$  NMR (101 MHz, Chloroform-*d*) spectrum of **3r****

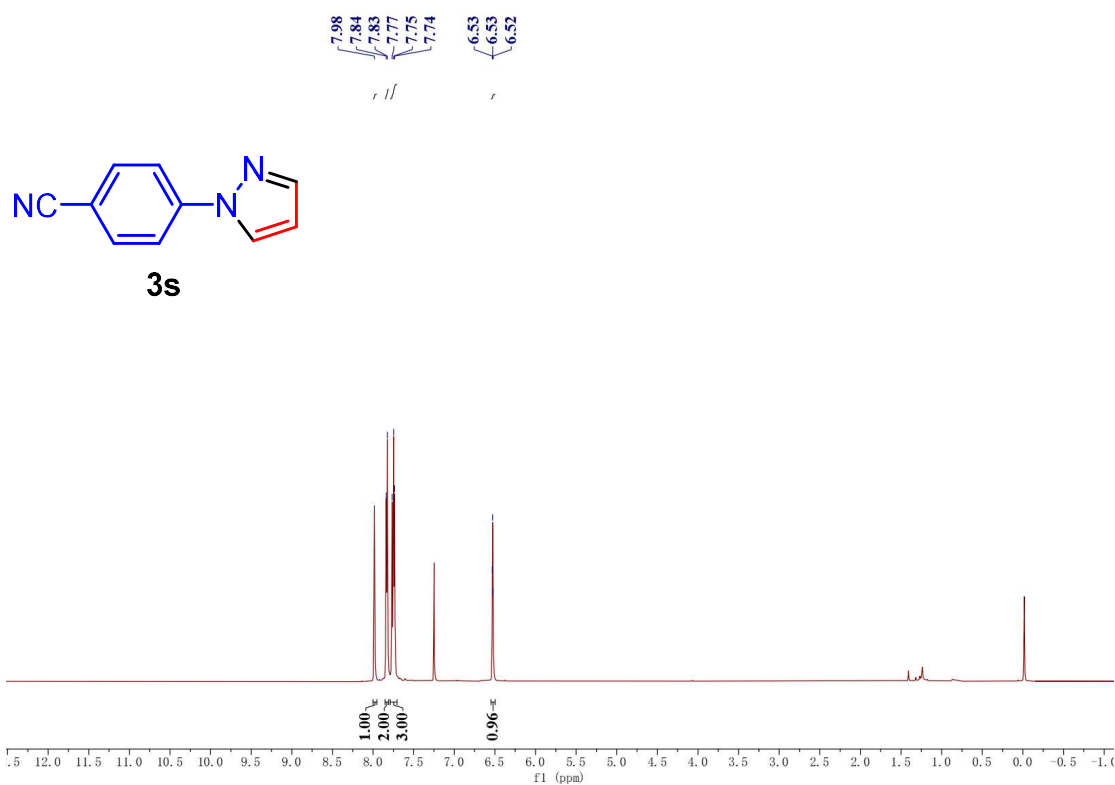

**$^1\text{H}$  NMR (600 MHz, Chloroform-*d*) spectrum of **3s****

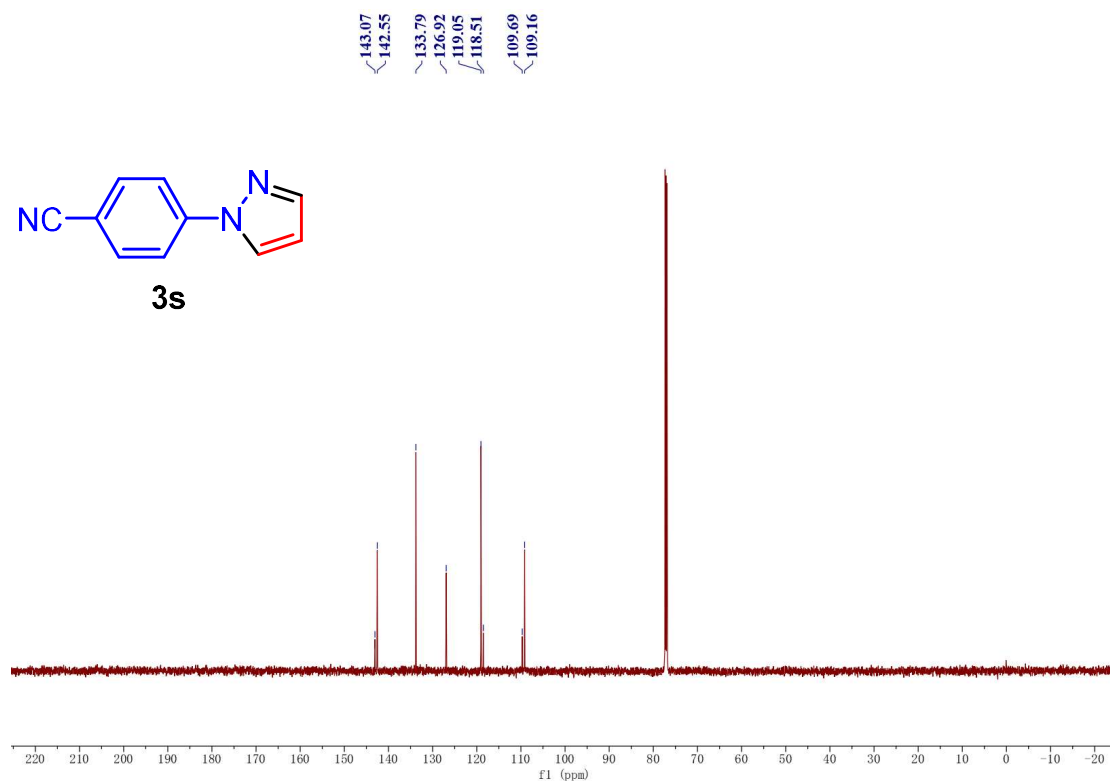

**$^{13}\text{C}$  NMR (151 MHz, Chloroform-*d*) spectrum of **3s****

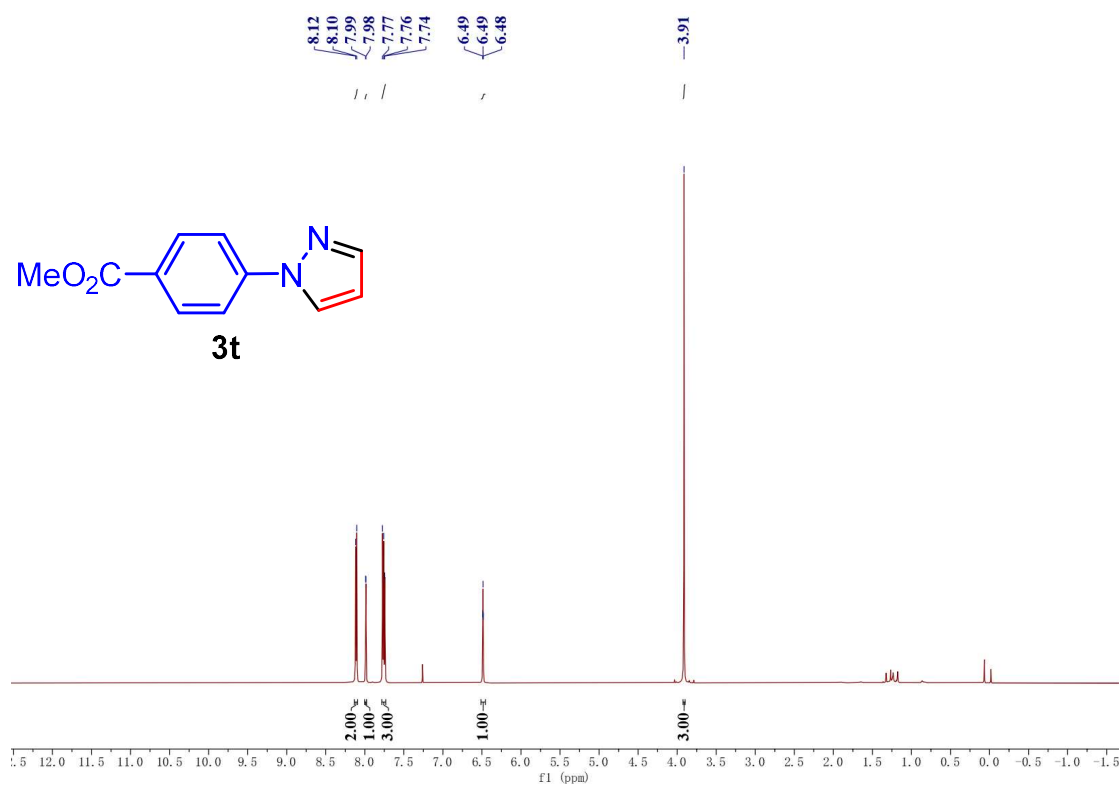

**$^1\text{H}$  NMR (600 MHz, Chloroform-*d*) spectrum of **3t****

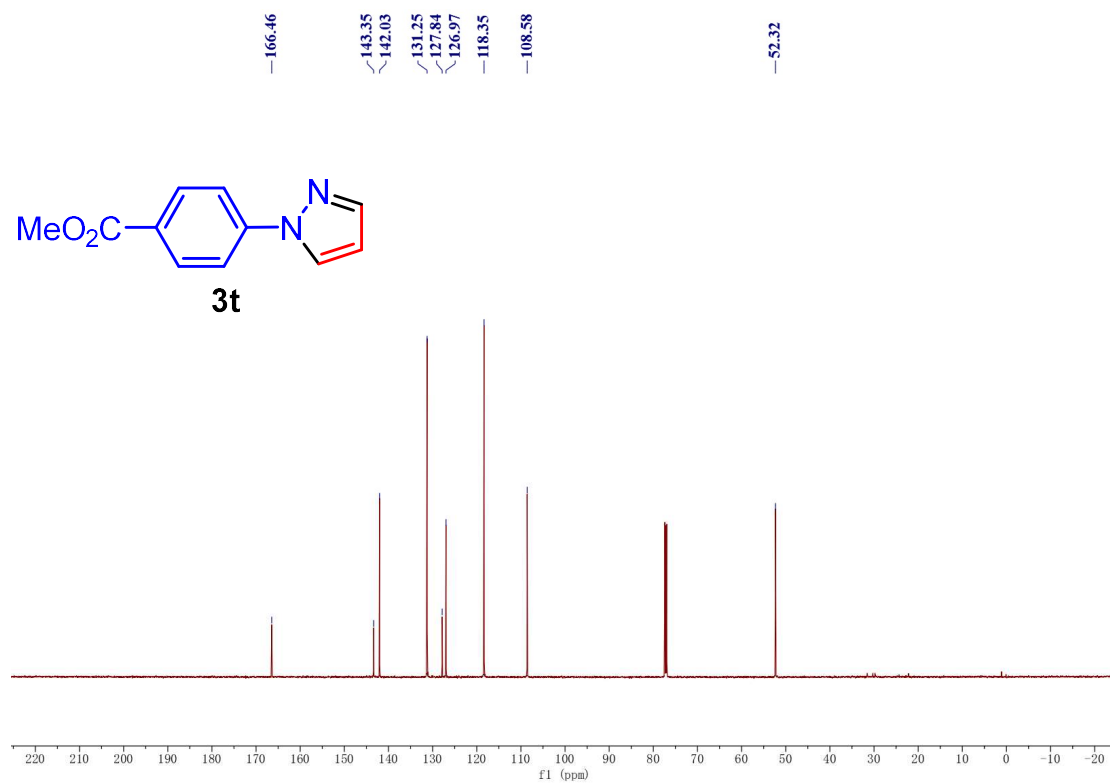

<sup>13</sup>C NMR (151 MHz, Chloroform-*d*) spectrum of **3t**

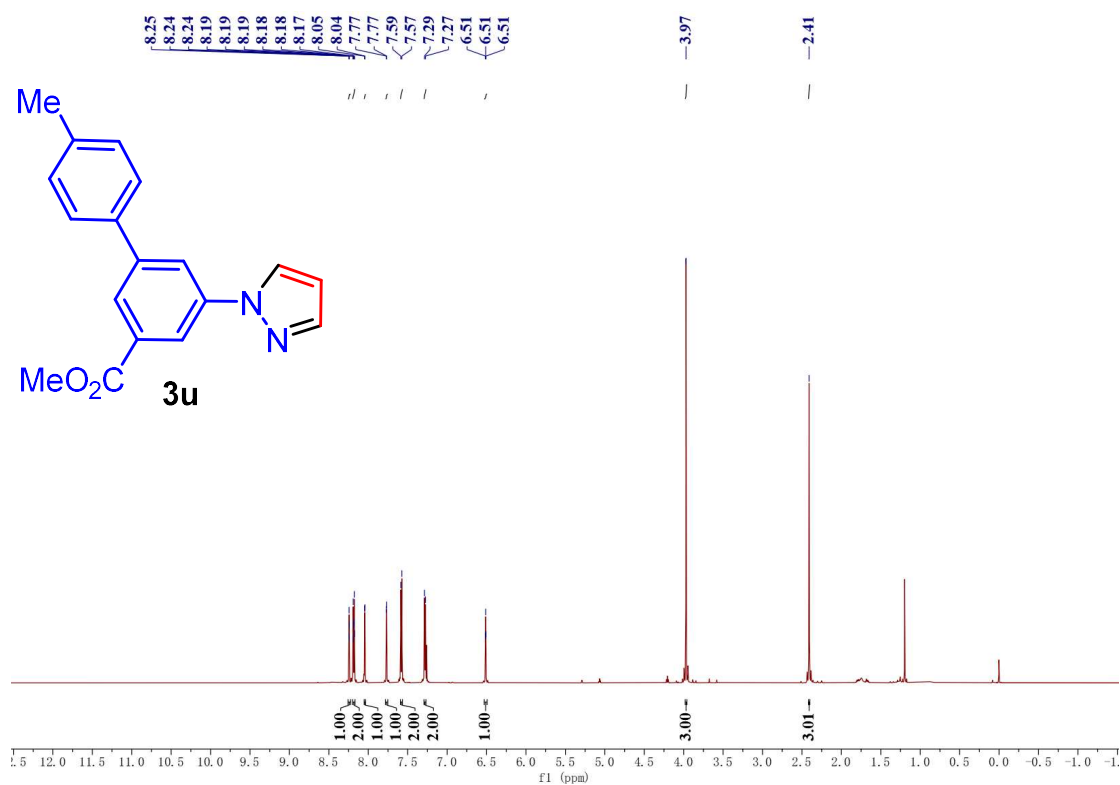

<sup>1</sup>H NMR (600 MHz, Chloroform-*d*) spectrum of **3u**

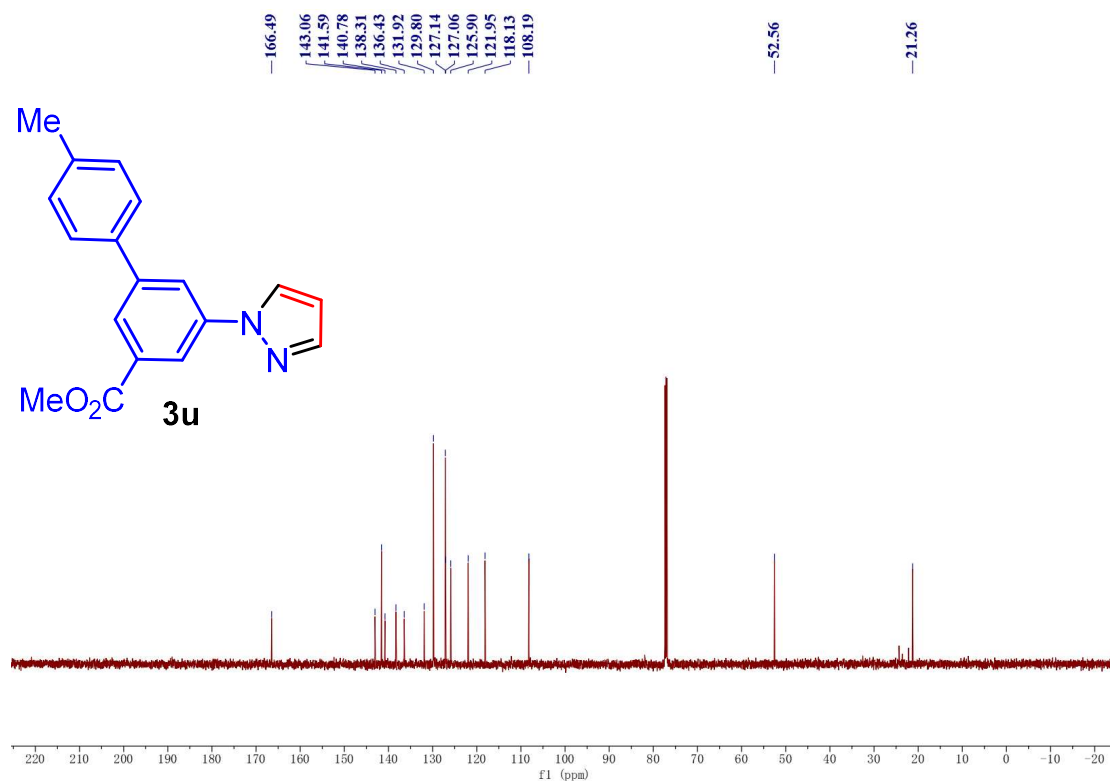

$^{13}\text{C}$  NMR (151 MHz, Chloroform-*d*) spectrum of **3u**

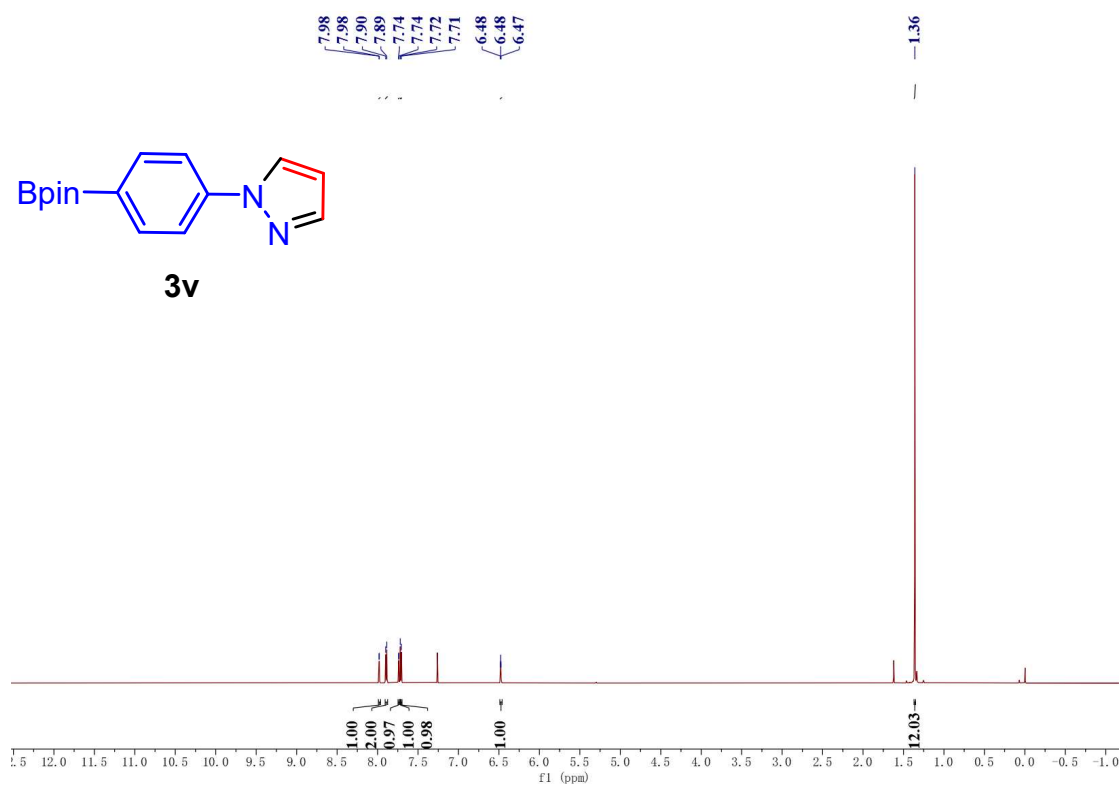

$^1\text{H}$  NMR (600 MHz, Chloroform-*d*) spectrum of **3v**

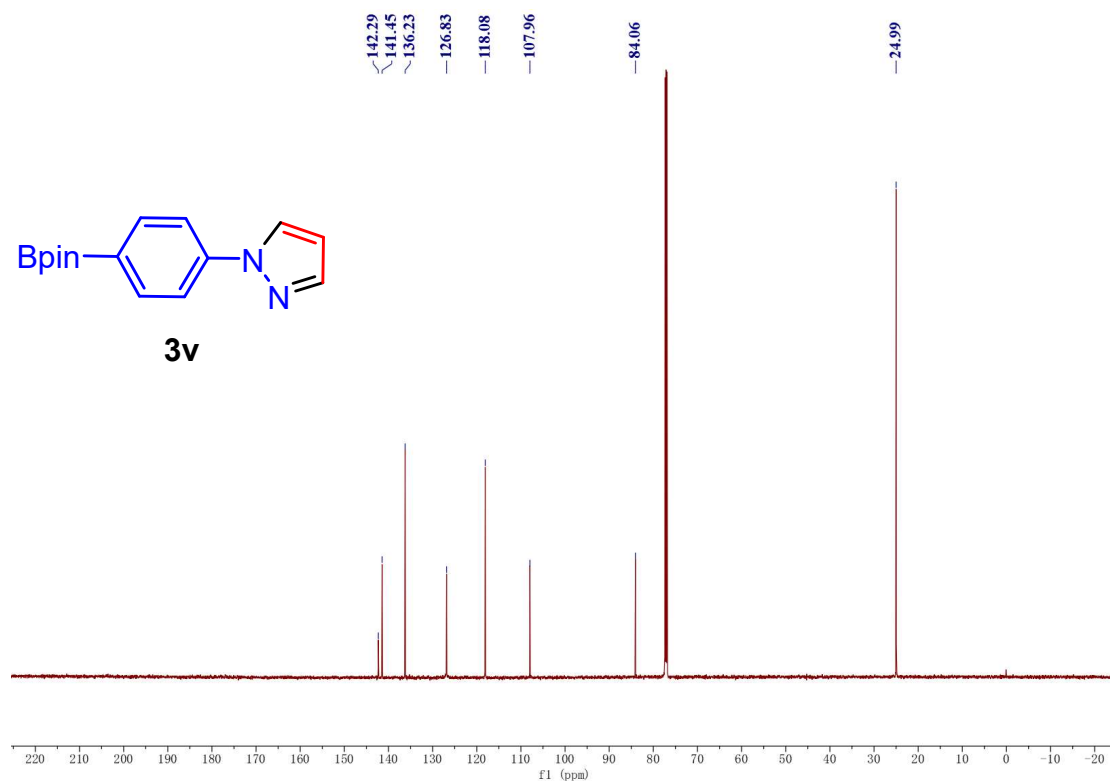

<sup>13</sup>C NMR (151 MHz, Chloroform-*d*) spectrum of **3v**

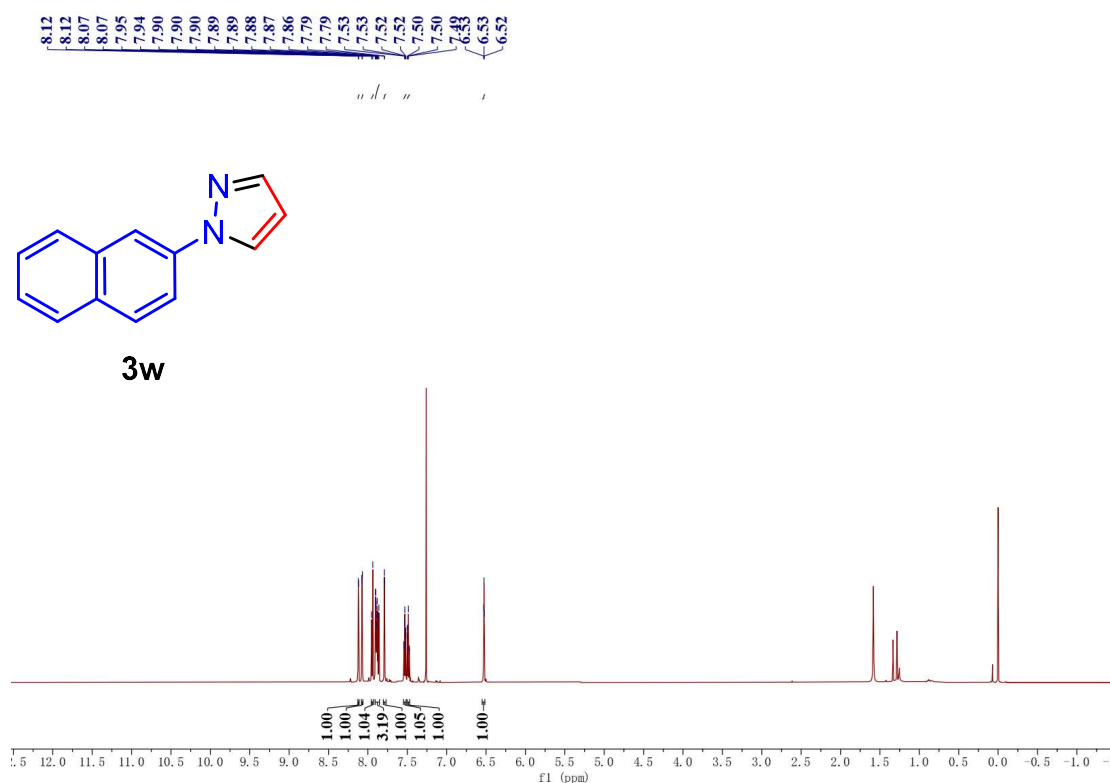

<sup>1</sup>H NMR (600 MHz, Chloroform-*d*) spectrum of **3w**

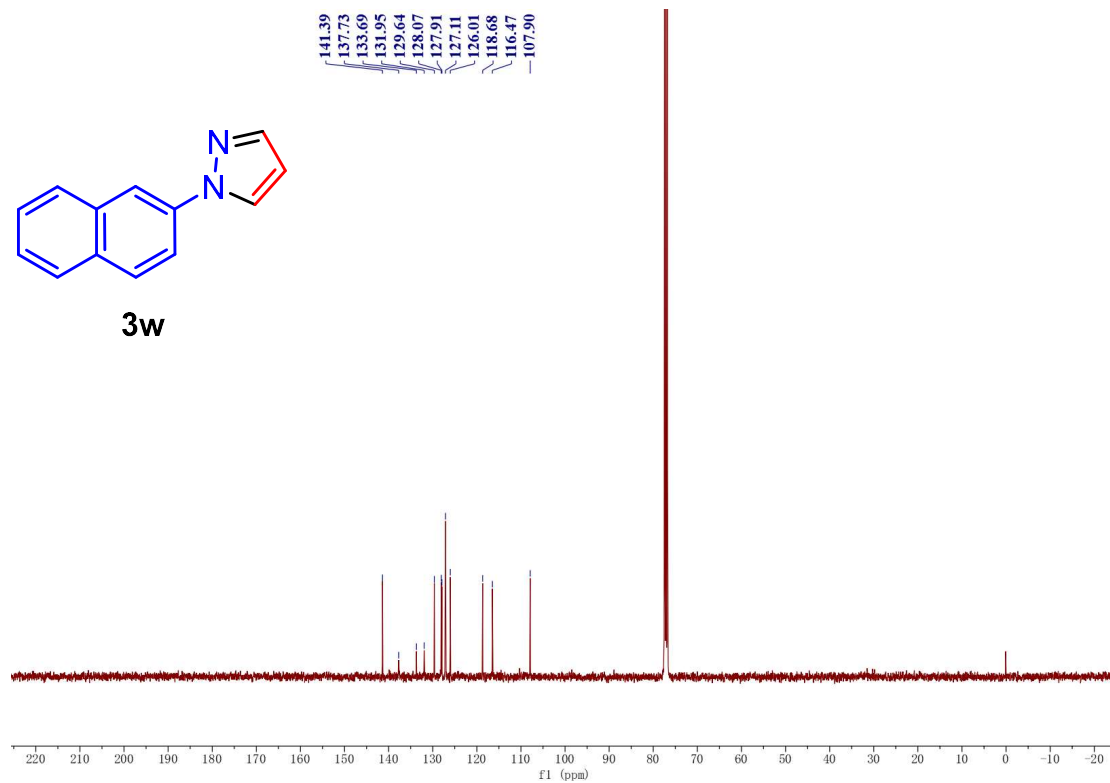

$^{13}\text{C}$  NMR (151 MHz, Chloroform-*d*) spectrum of **3w**

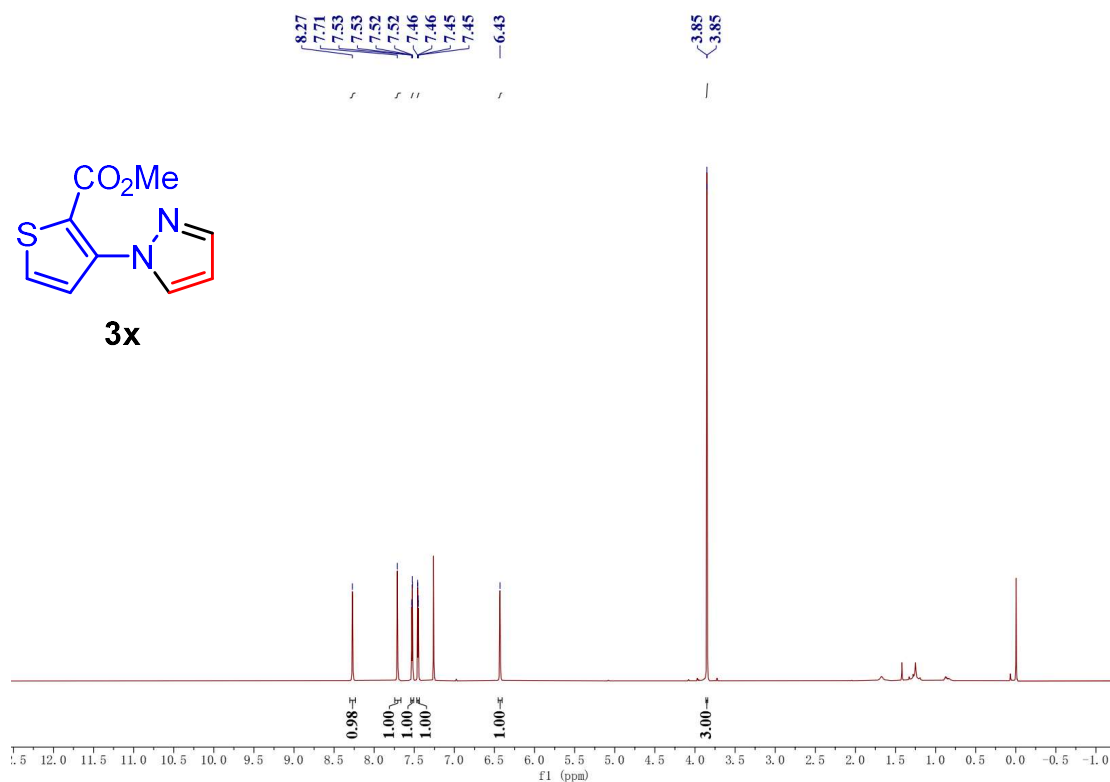

$^1\text{H}$  NMR (600 MHz, Chloroform-*d*) spectrum of **3x**



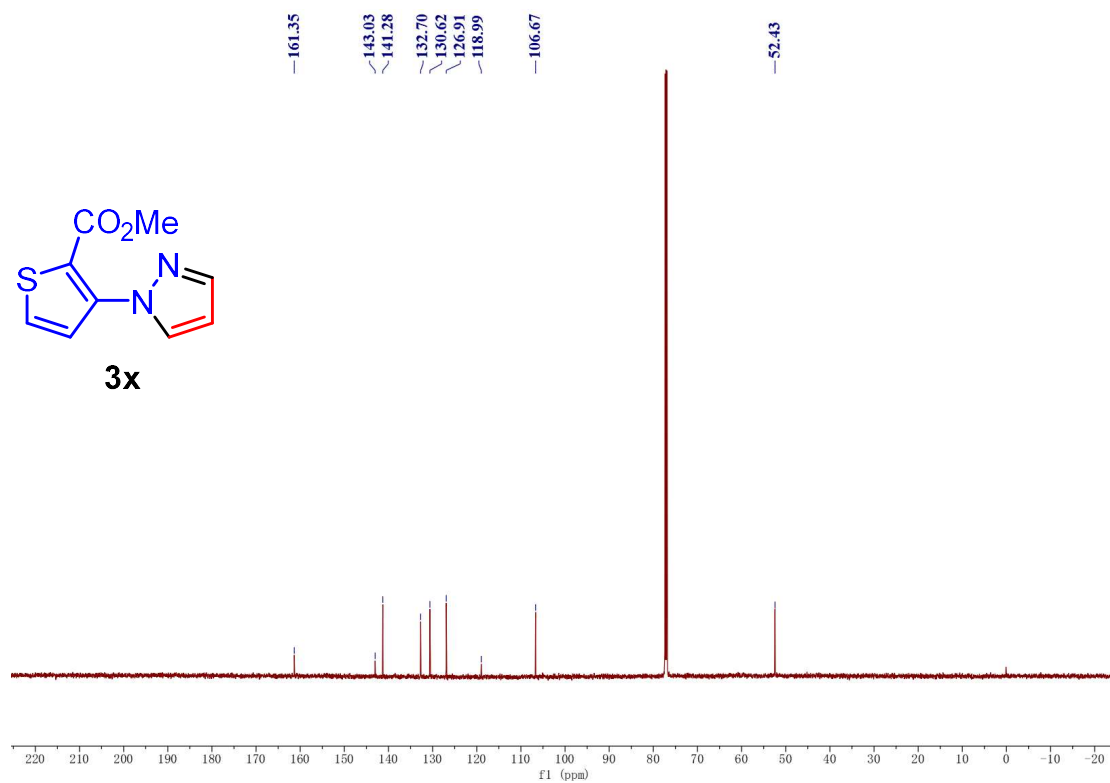

<sup>13</sup>C NMR (151 MHz, Chloroform-*d*) spectrum of **3x**

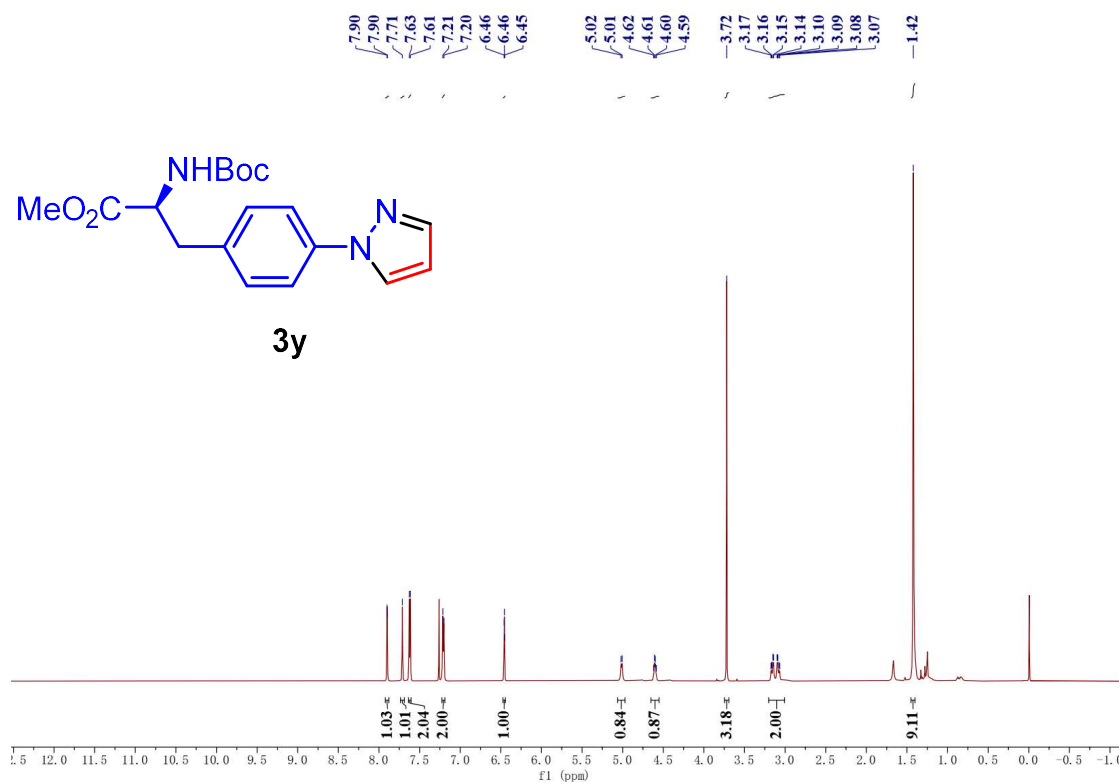

<sup>1</sup>H NMR (600 MHz, Chloroform-*d*) spectrum of **3y**

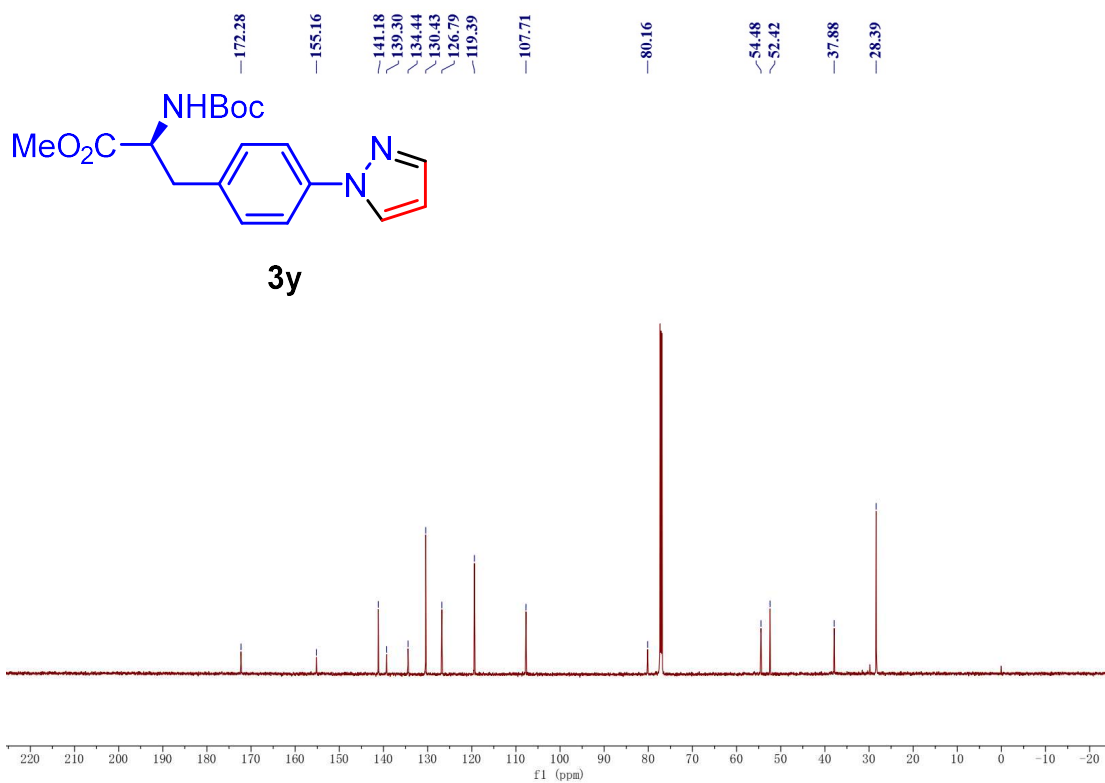

$^{13}\text{C}$  NMR (151 MHz, Chloroform-*d*) spectrum of **3y**

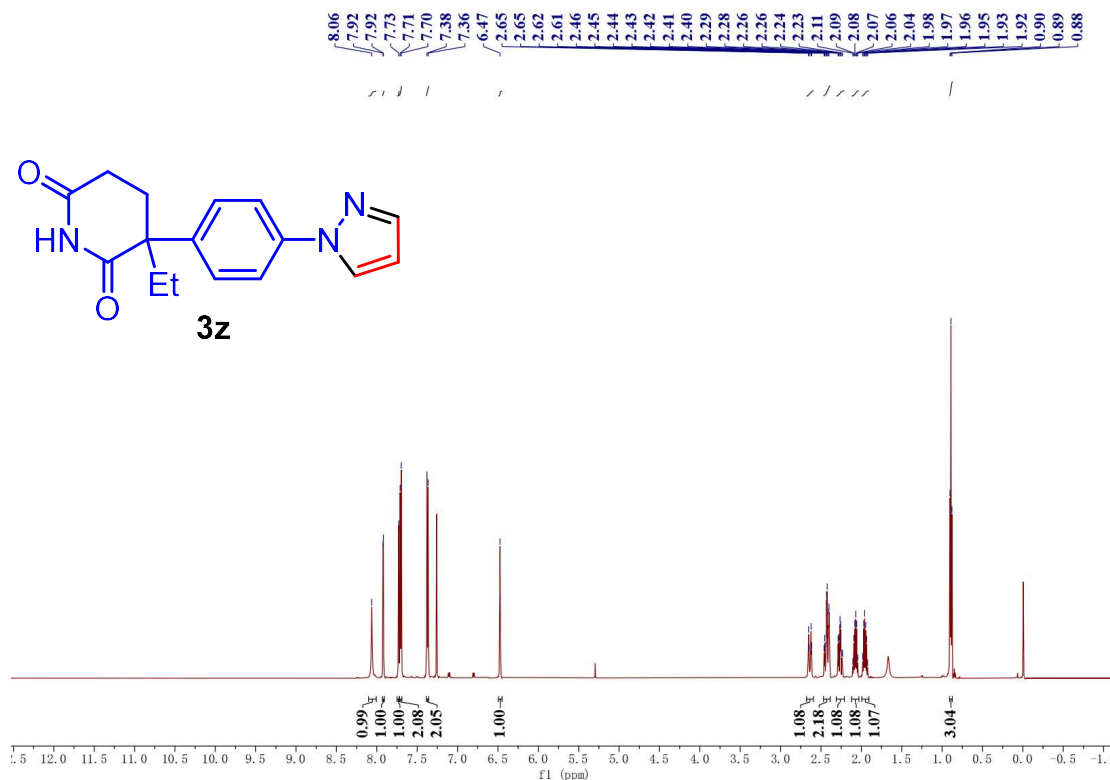

$^1\text{H}$  NMR (600 MHz, Chloroform-*d*) spectrum of **3z**

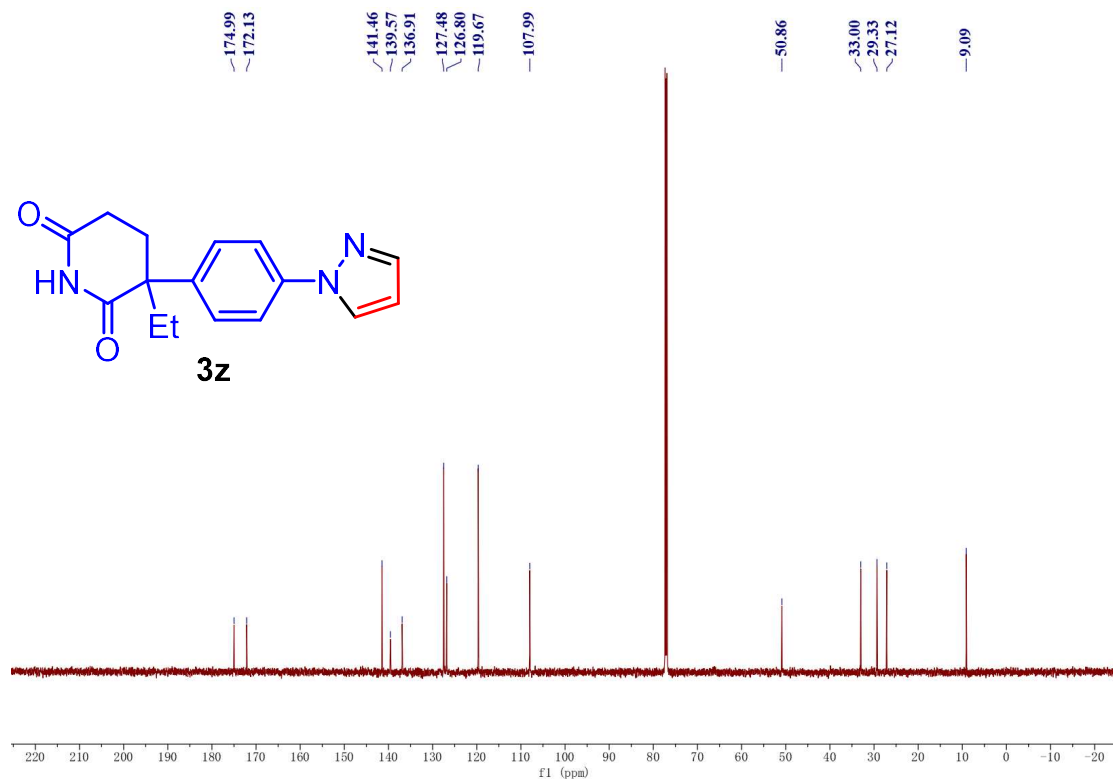

<sup>13</sup>C NMR (151 MHz, Chloroform-*d*) spectrum of **3z**

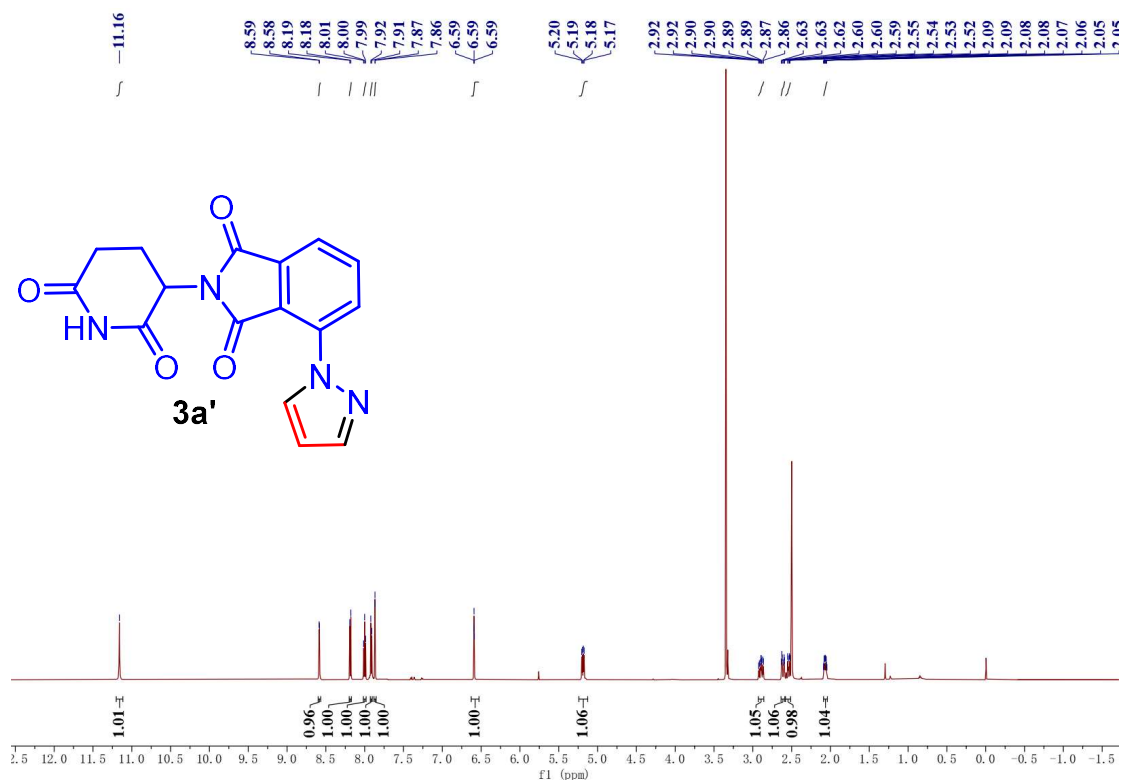

<sup>1</sup>H NMR (600 MHz, DMSO-*d*<sub>6</sub>) spectrum of **3a'**

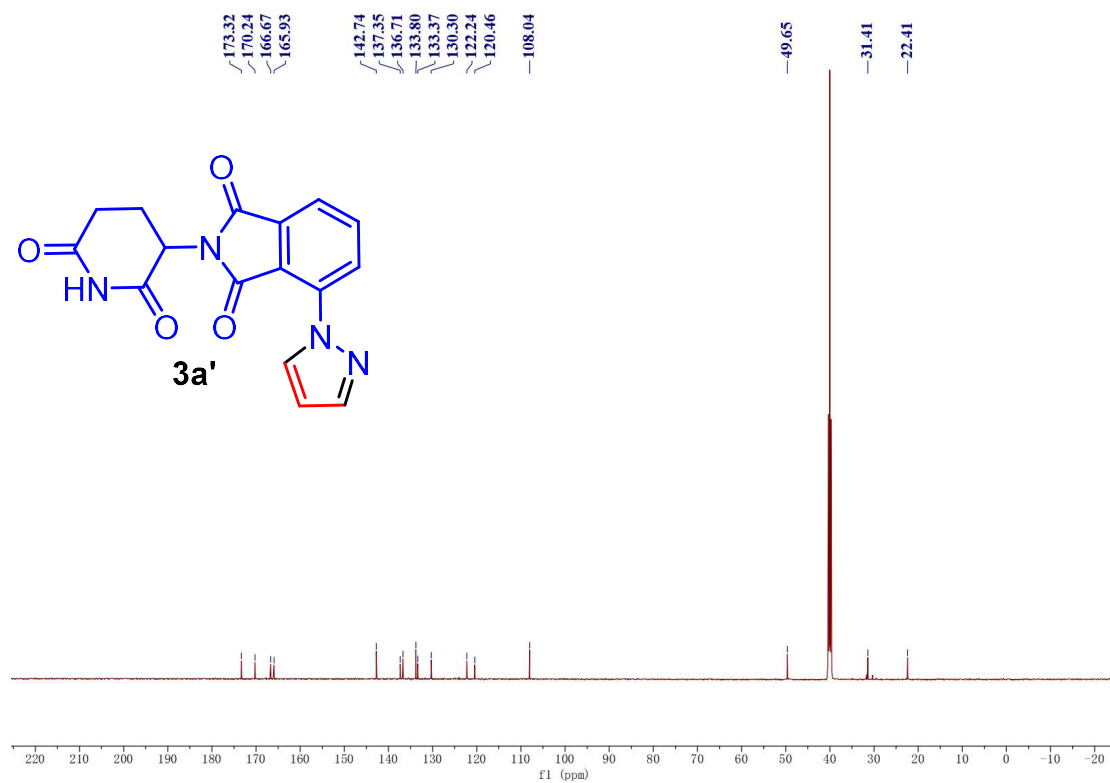

<sup>13</sup>C NMR (151 MHz, DMSO-*d*<sub>6</sub>) spectrum of **3a'**

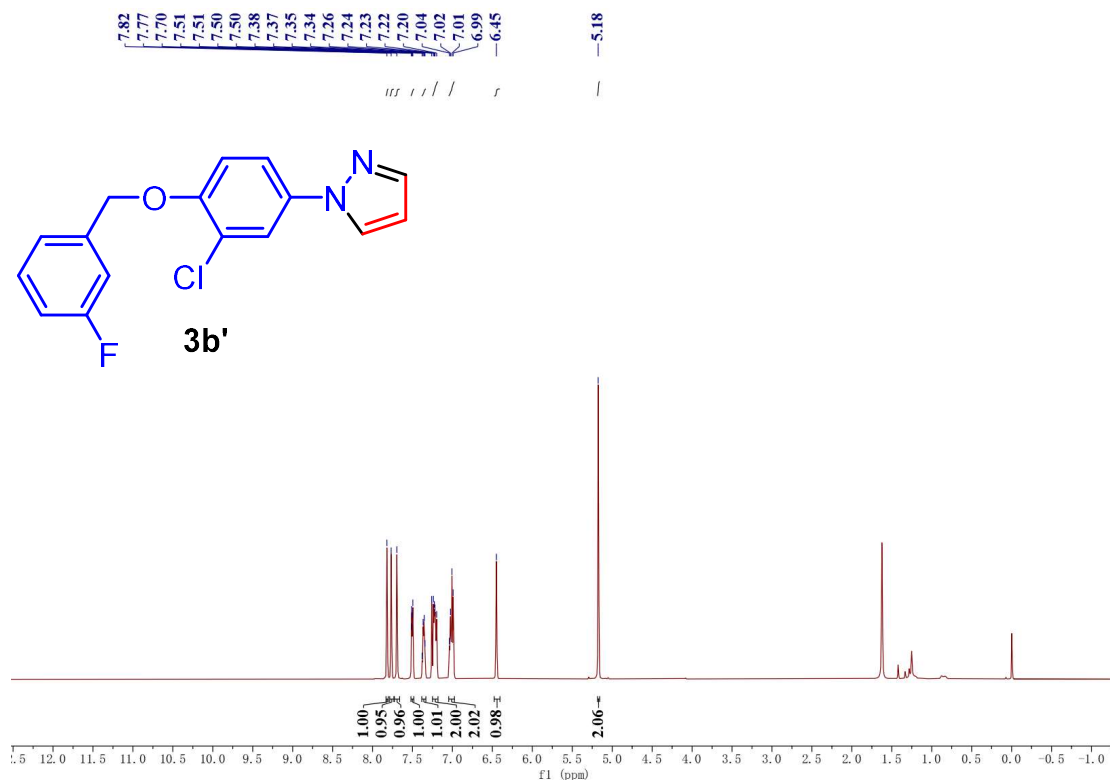

<sup>1</sup>H NMR (600 MHz, Chloroform-*d*) spectrum of **3b'**

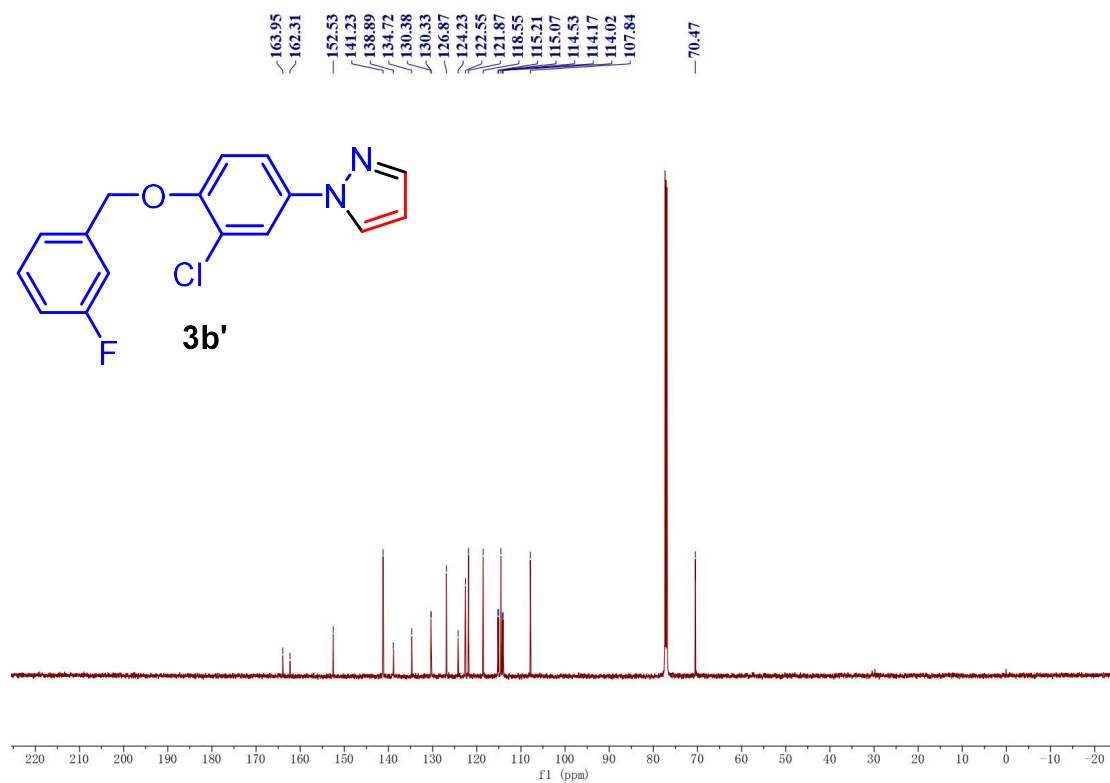

$^{13}\text{C}$  NMR (151 MHz, Chloroform-*d*) spectrum of **3b'**

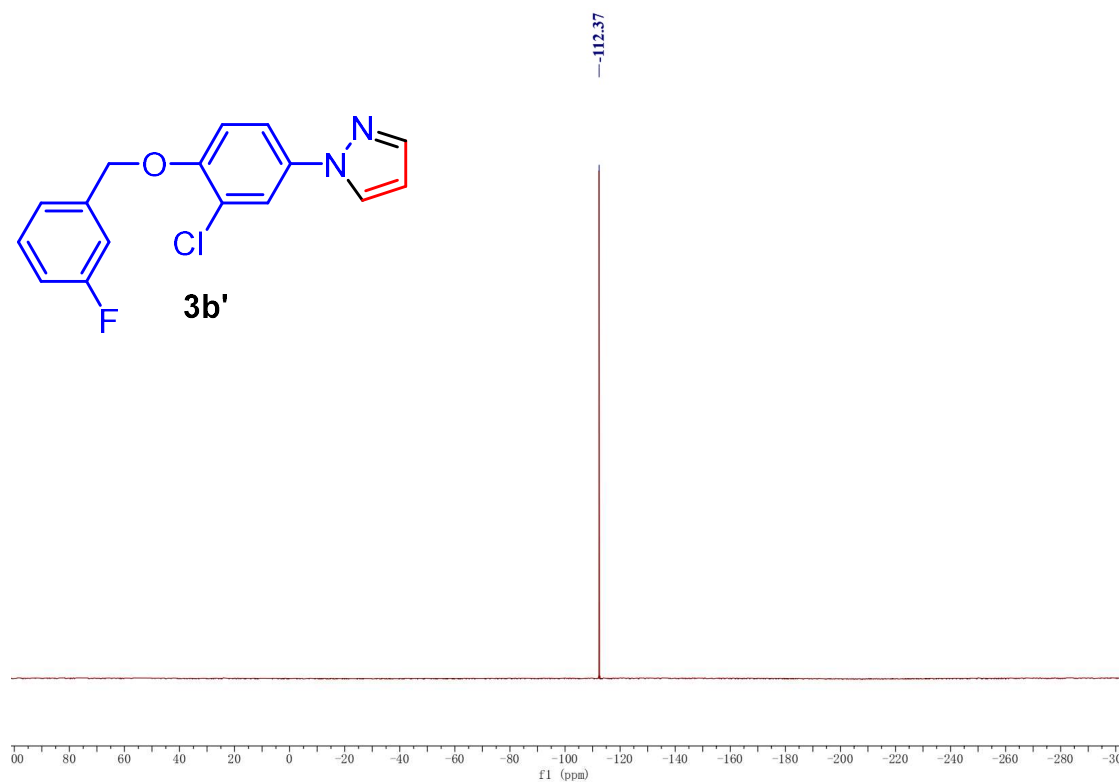

$^{19}\text{F}$  NMR (565 MHz, Chloroform-*d*) spectrum of **3b'**

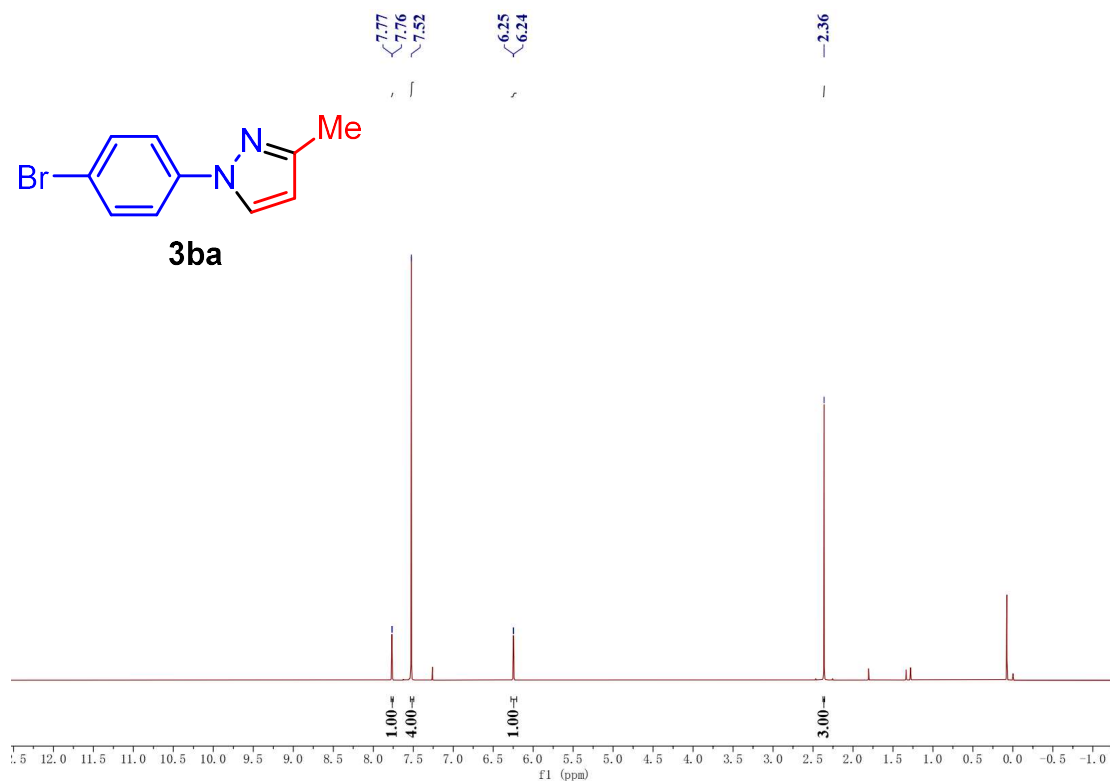

$^1\text{H}$  NMR (600 MHz, Chloroform-*d*) spectrum of **3ba**

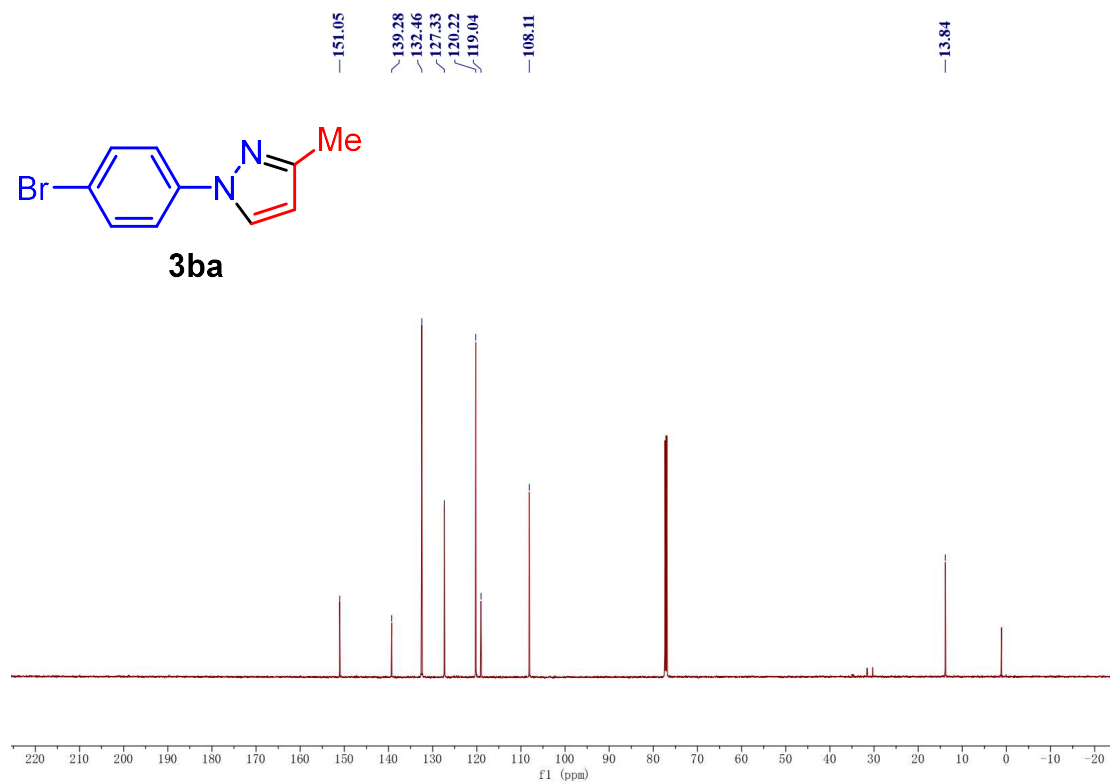

$^{13}\text{C}$  NMR (151 MHz, Chloroform-*d*) spectrum of **3ba**

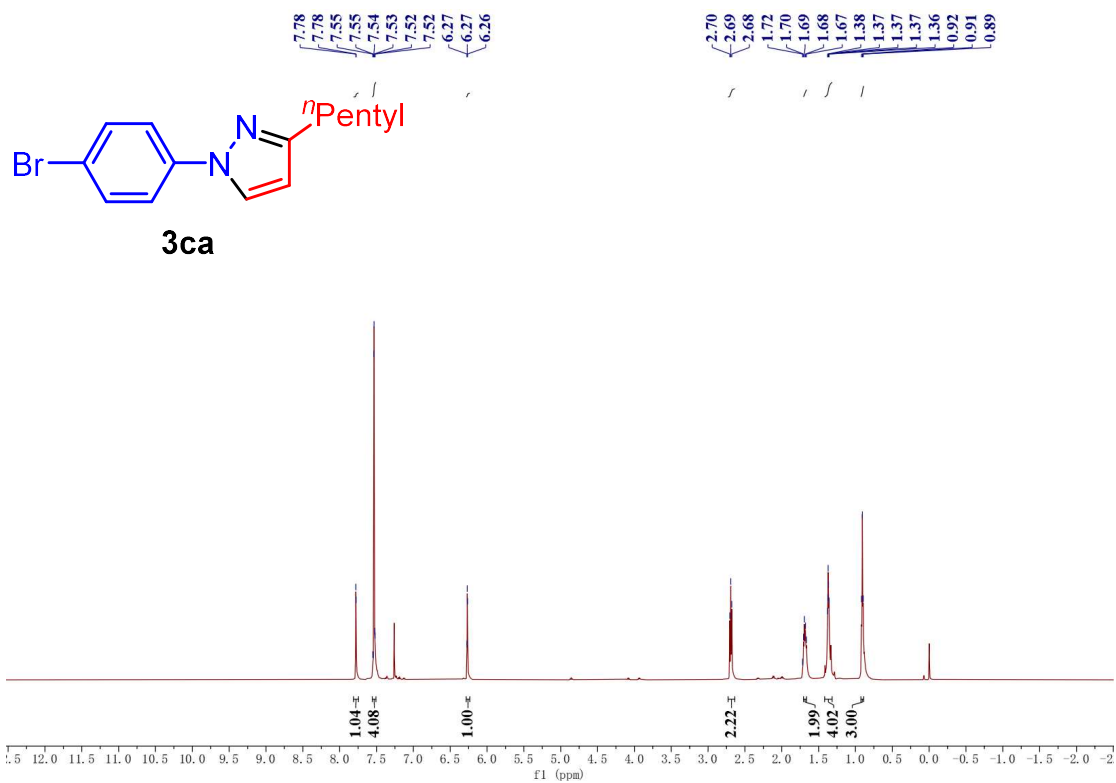

$^1\text{H}$  NMR (600 MHz, Chloroform-*d*) spectrum of **3ca**

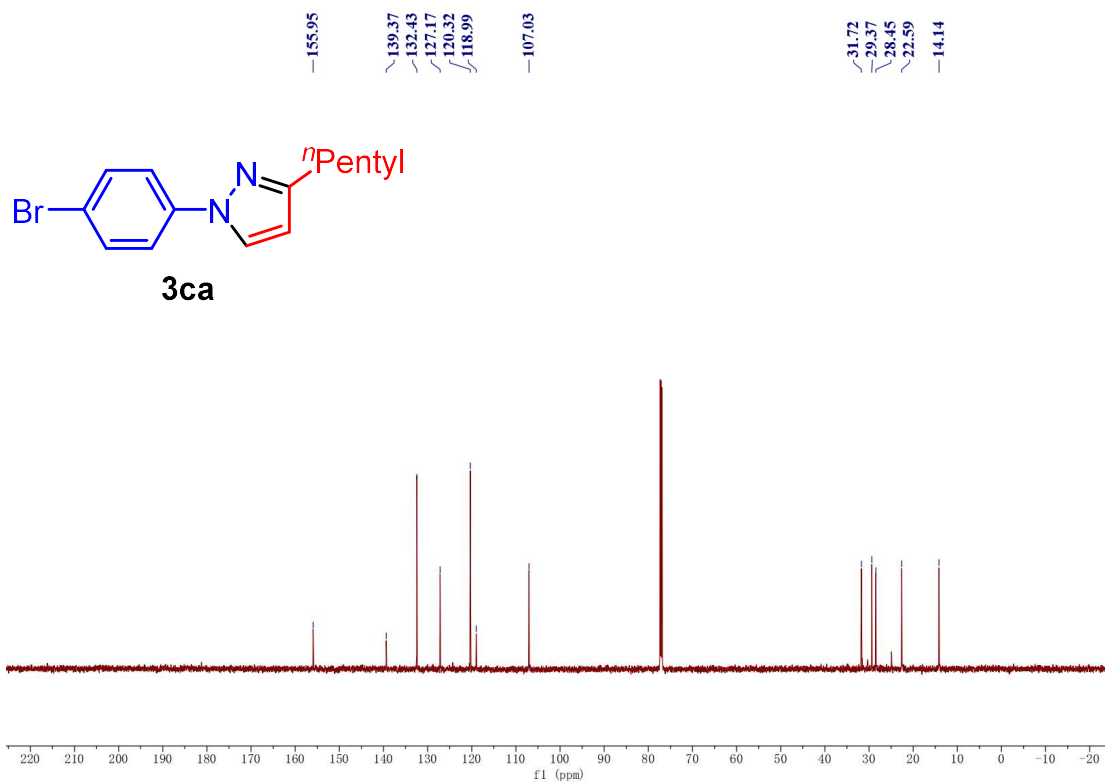

$^{13}\text{C}$  NMR (151 MHz, Chloroform-*d*) spectrum of **3ca**

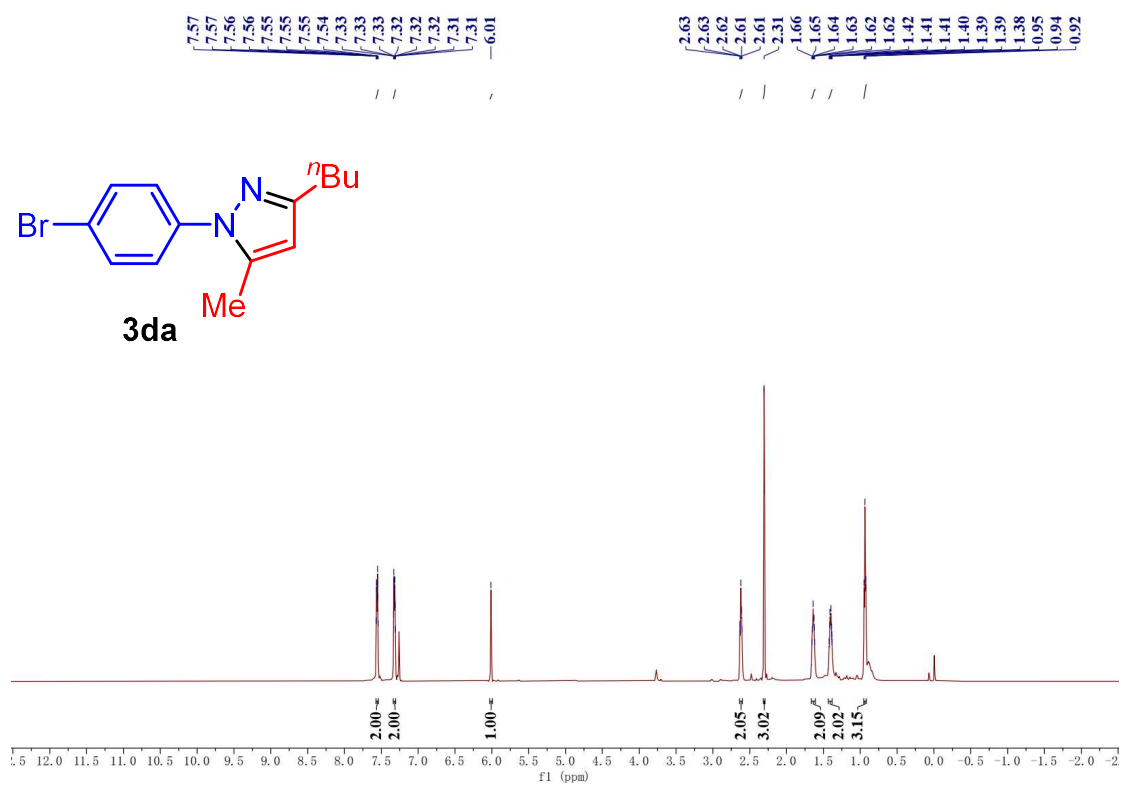

<sup>1</sup>H NMR (600 MHz, Chloroform-*d*) spectrum of **3da**

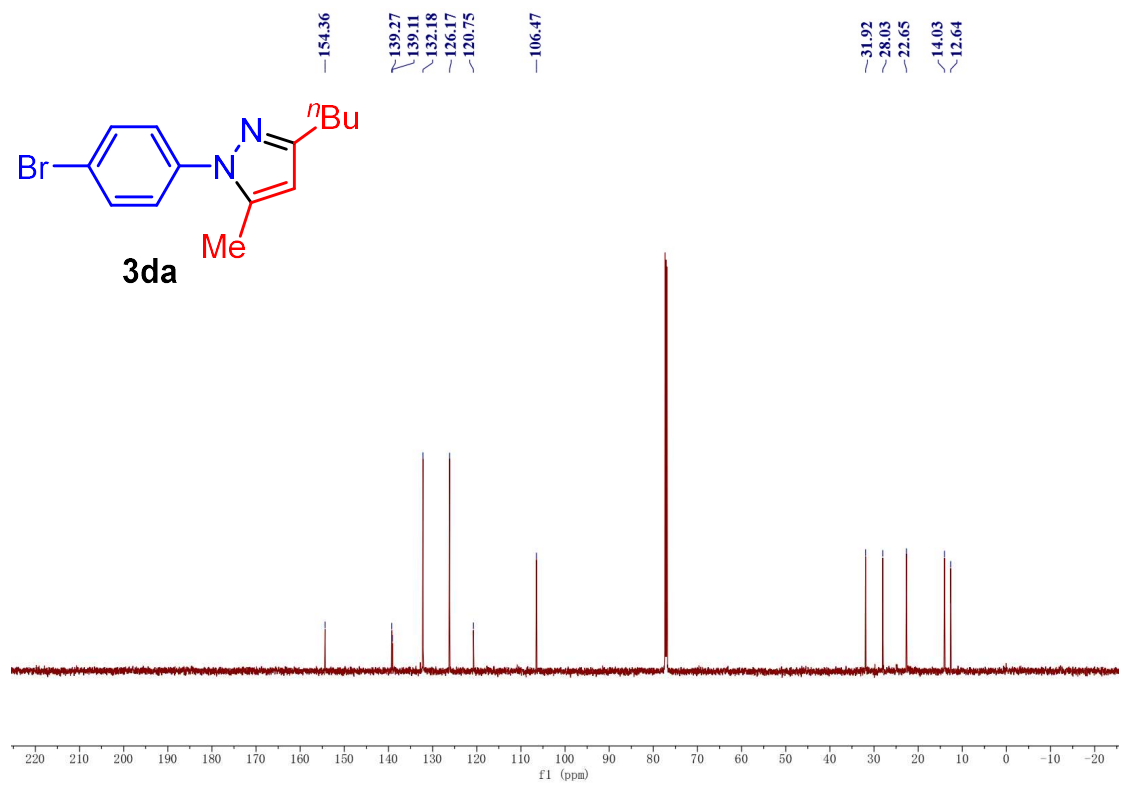

<sup>13</sup>C NMR (151 MHz, Chloroform-*d*) spectrum of **3da**



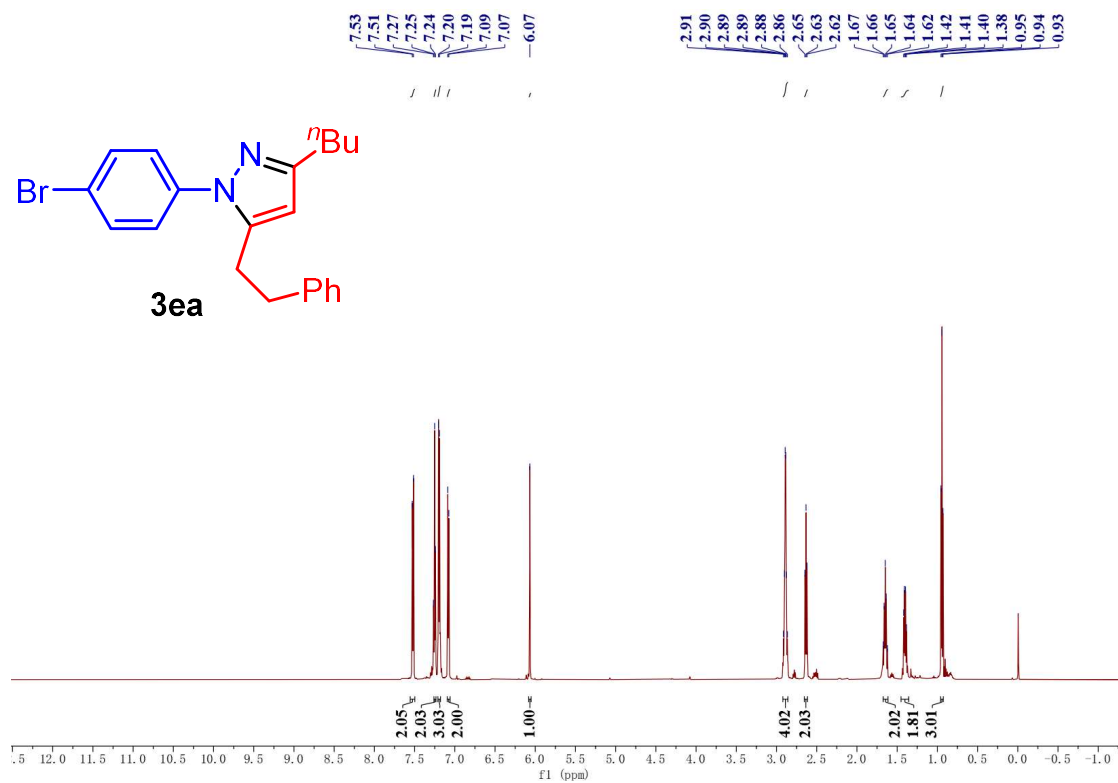

**<sup>1</sup>H NMR (600 MHz, Chloroform-*d*) spectrum of 3ea**

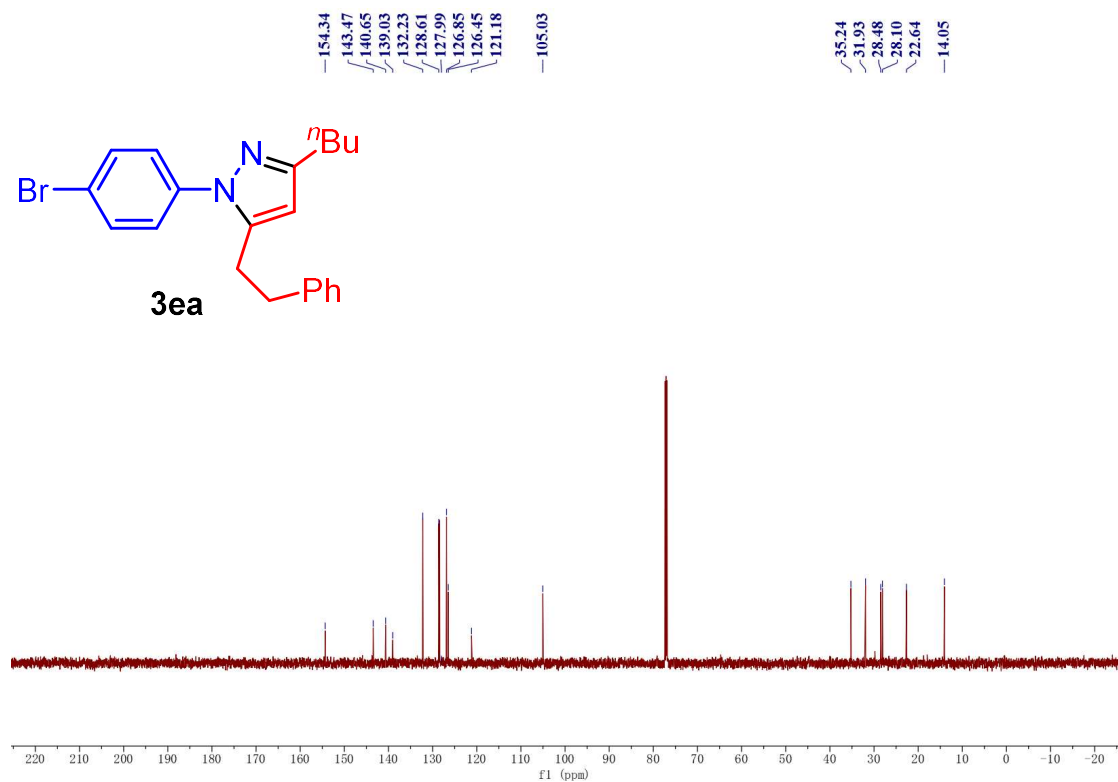

**<sup>13</sup>C NMR (151 MHz, Chloroform-*d*) spectrum of 3ea**

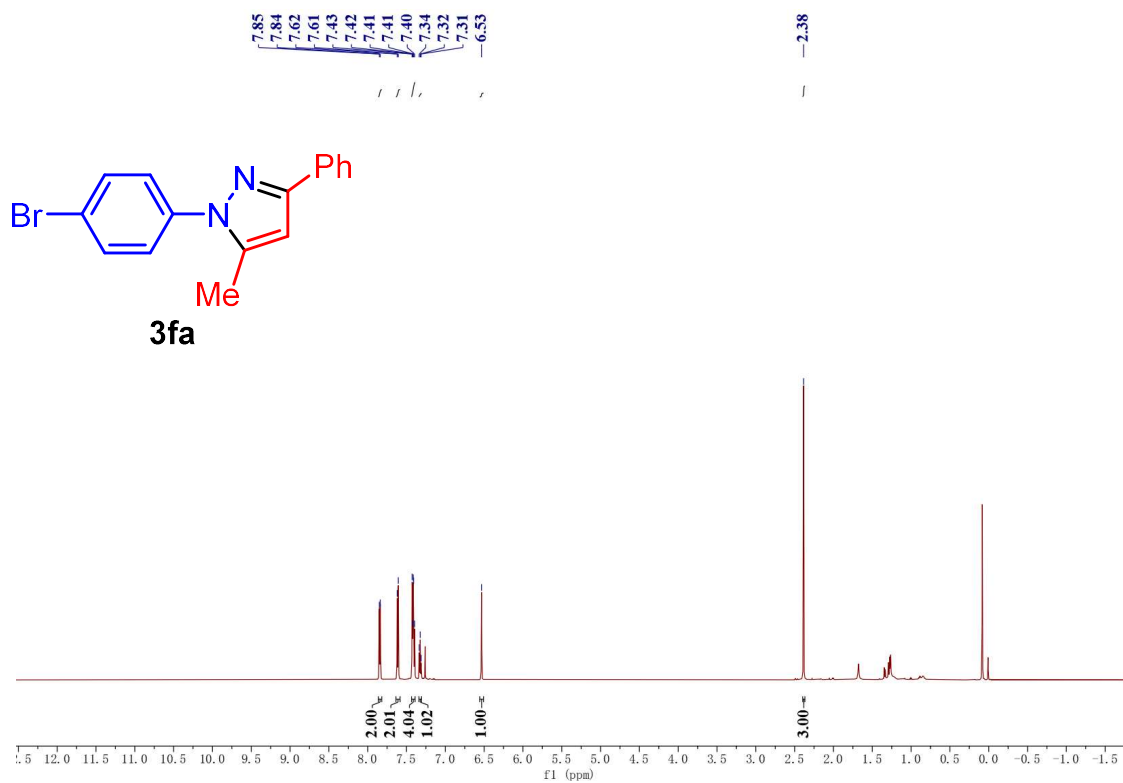

$^1\text{H}$  NMR (600 MHz, Chloroform-*d*) spectrum of **3fa**

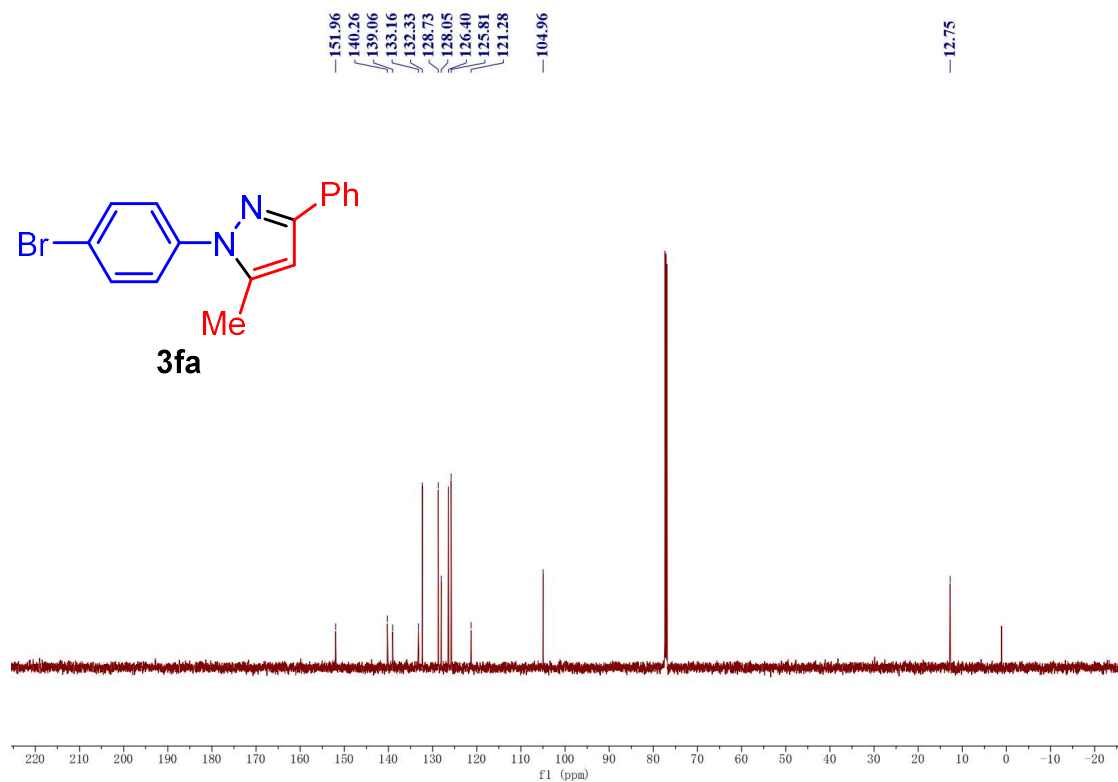

$^{13}\text{C}$  NMR (151 MHz, Chloroform-*d*) spectrum of **3fa**

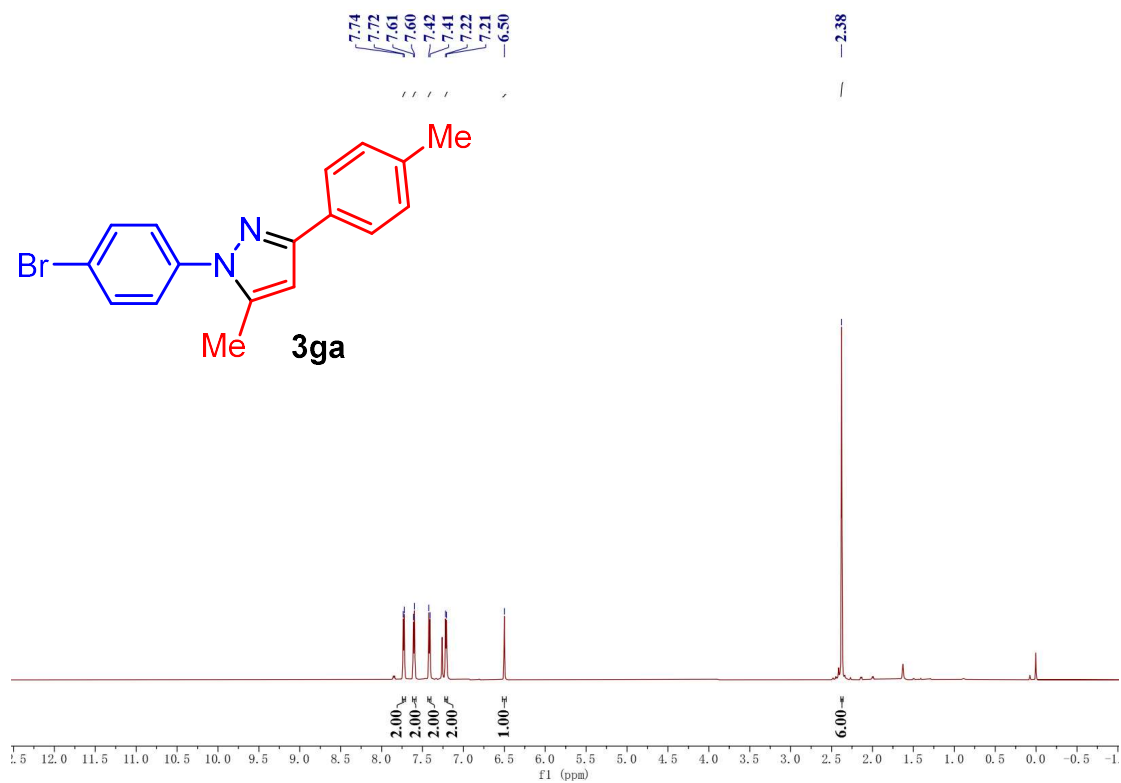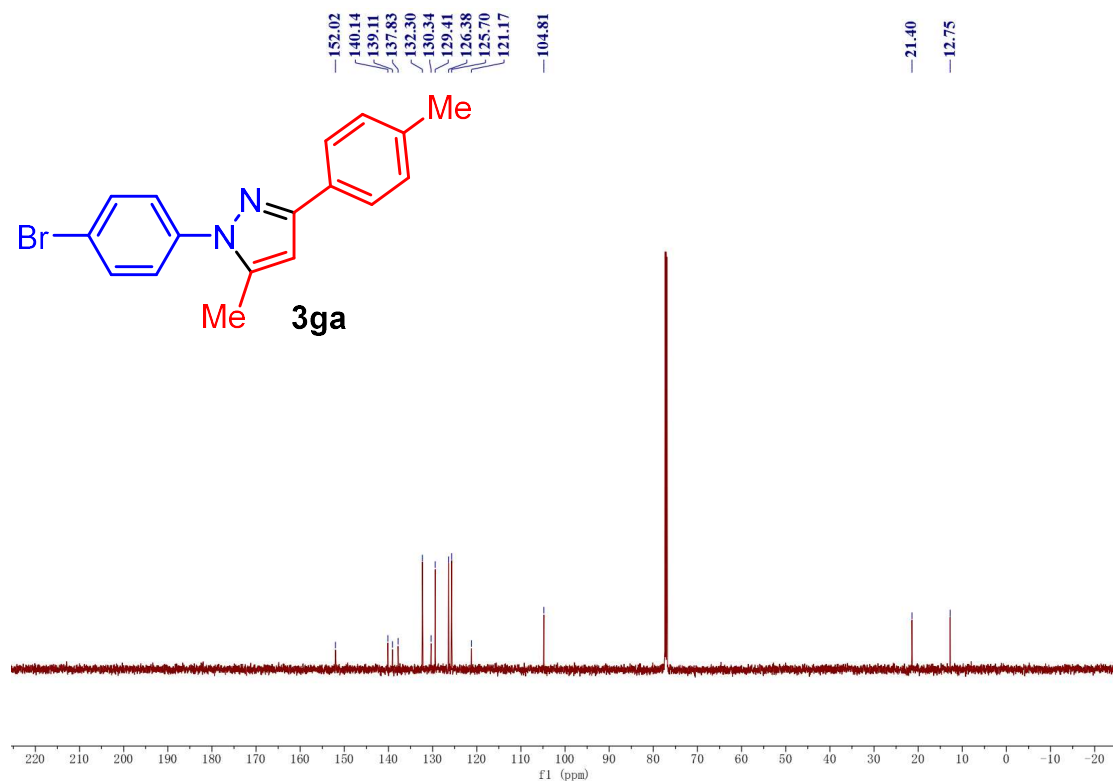

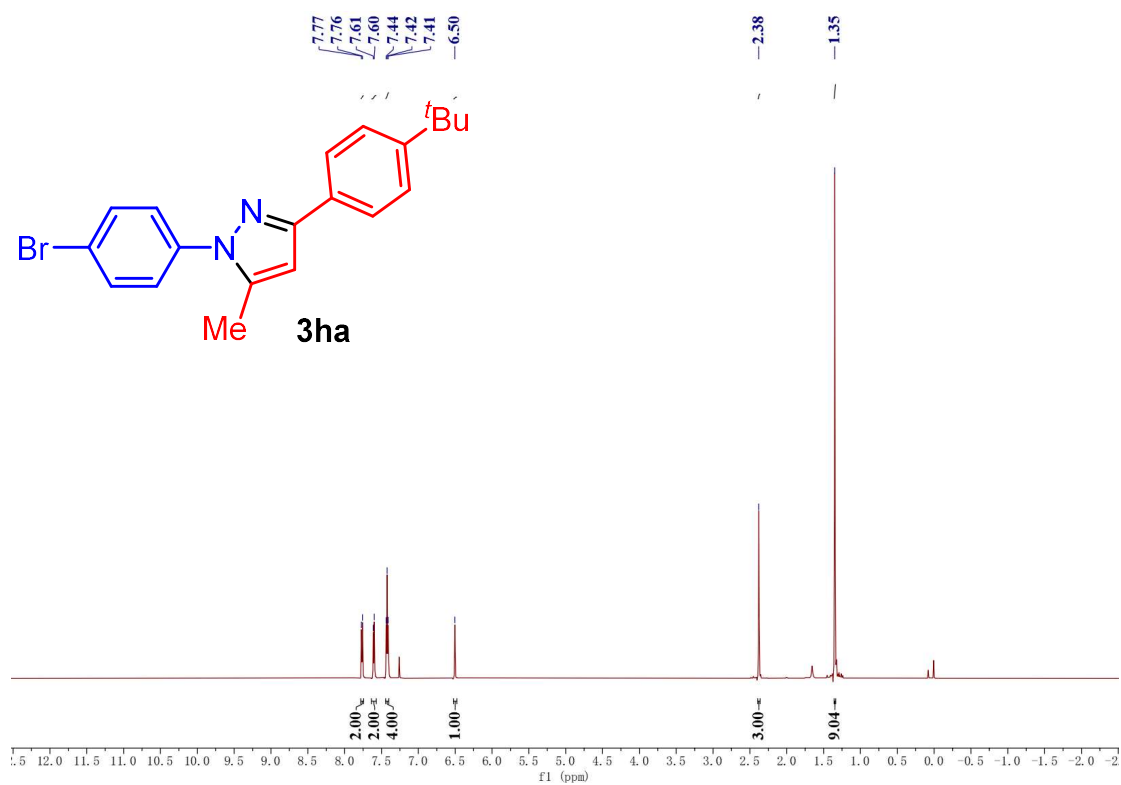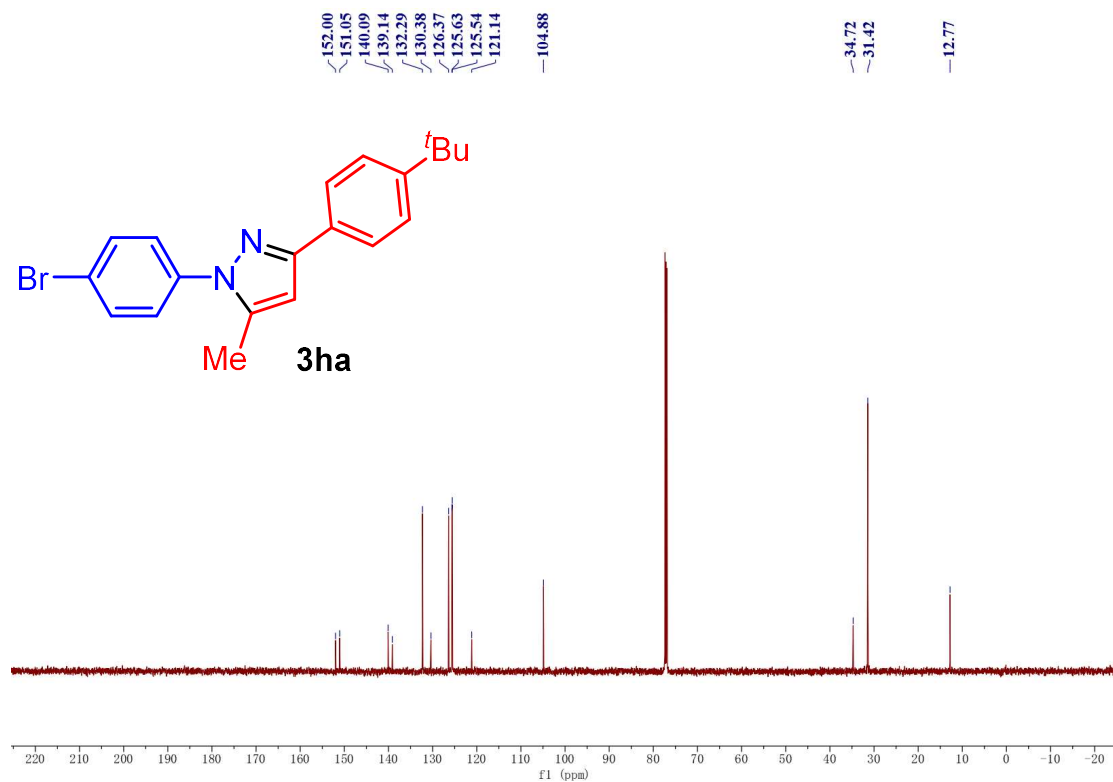

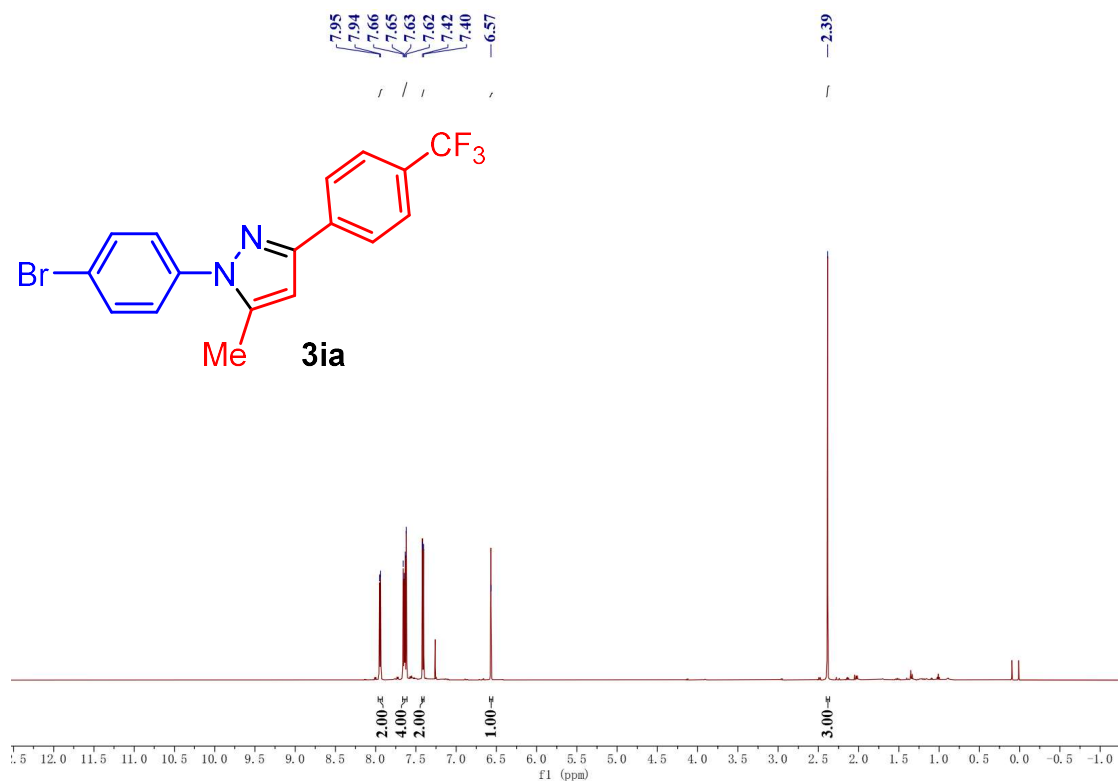

$^1\text{H}$  NMR (600 MHz, Chloroform-*d*) spectrum of **3ia**

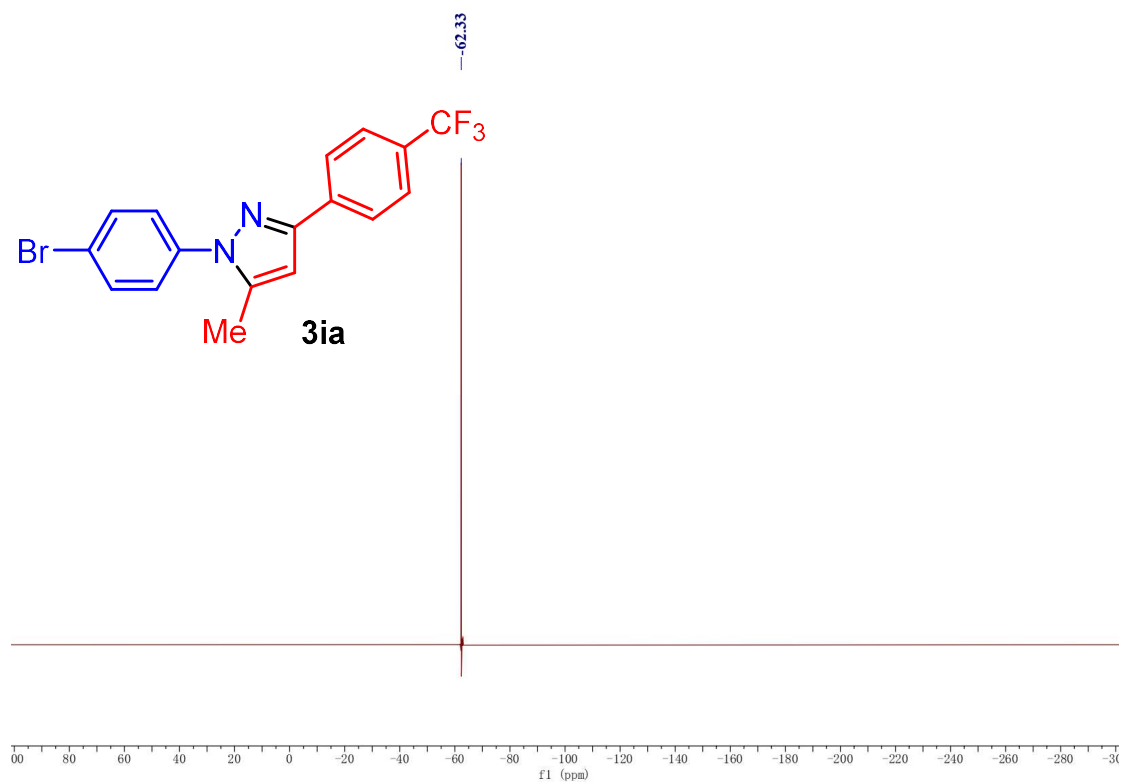

$^{19}\text{F}$  NMR (565 MHz, Chloroform-*d*) spectrum of **3ia**

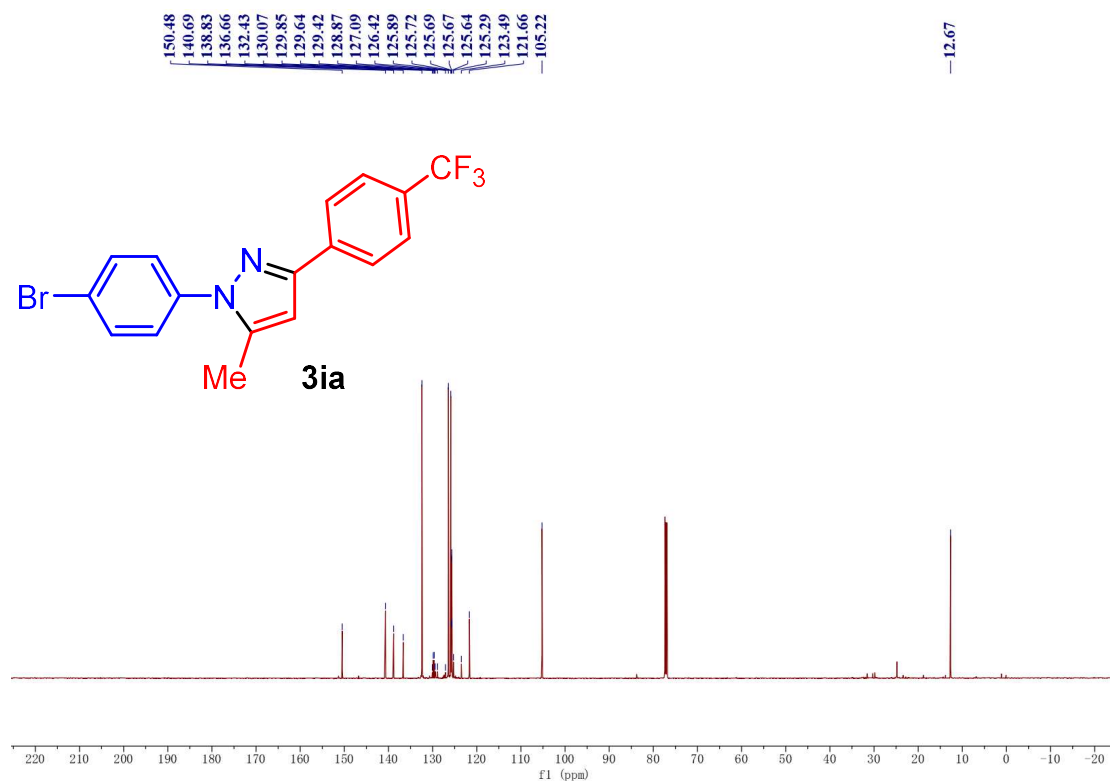

<sup>13</sup>C NMR (151 MHz, Chloroform-*d*) spectrum of **3ia**

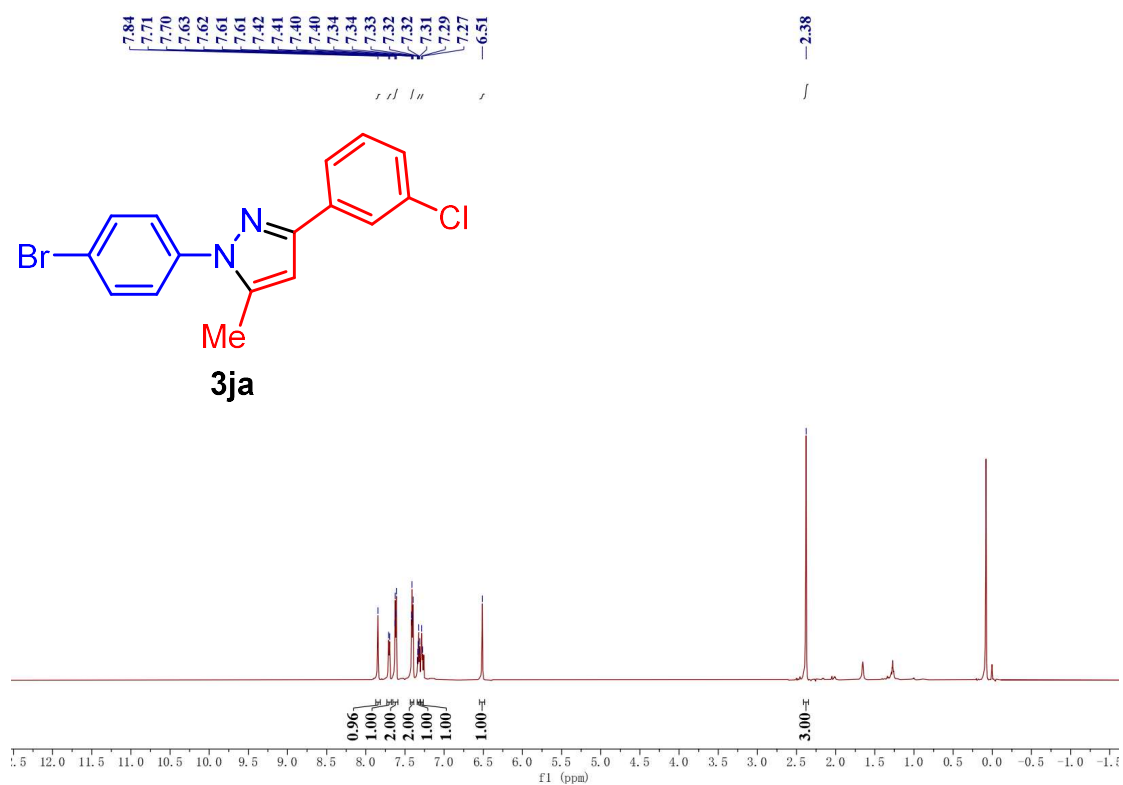

<sup>1</sup>H NMR (600 MHz, Chloroform-*d*) spectrum of **3ja**

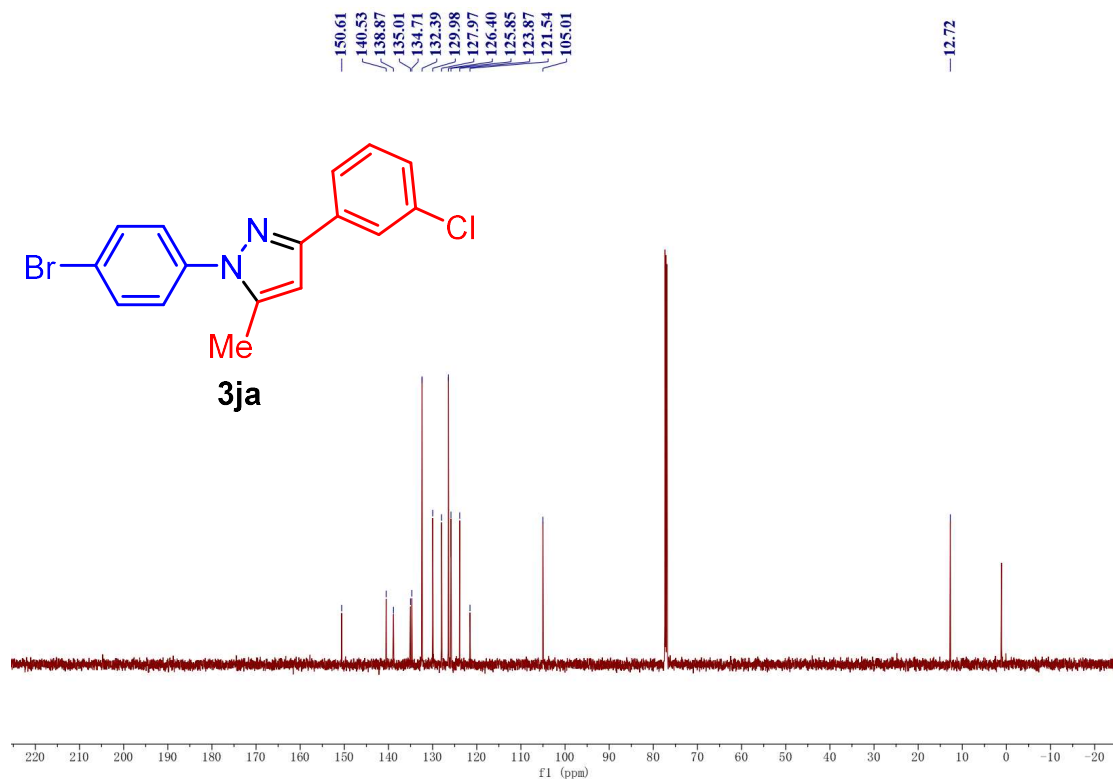

<sup>13</sup>C NMR (151 MHz, Chloroform-*d*) spectrum of **3ja**

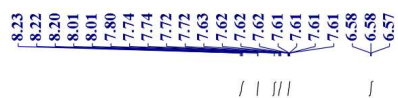

<sup>1</sup>H NMR (600 MHz, Chloroform-*d*) spectrum of **3c'**

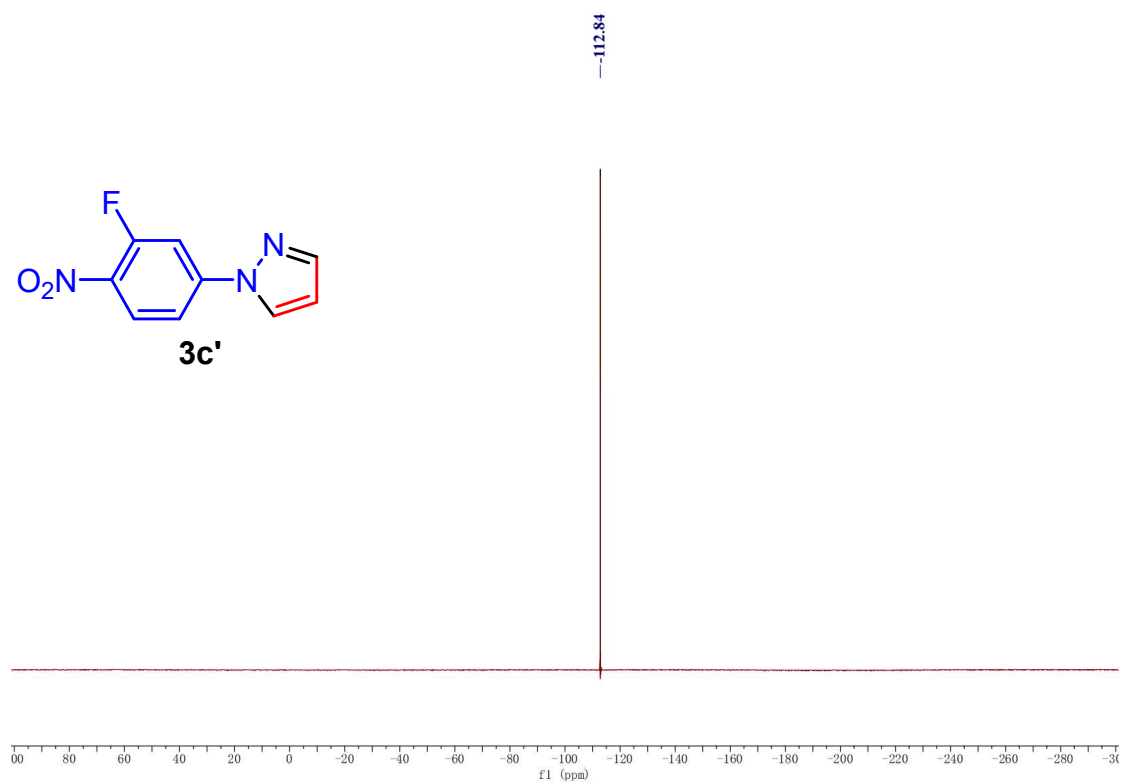

$^{19}\text{F}$  NMR (565 MHz, Chloroform-*d*) spectrum of **3c'**

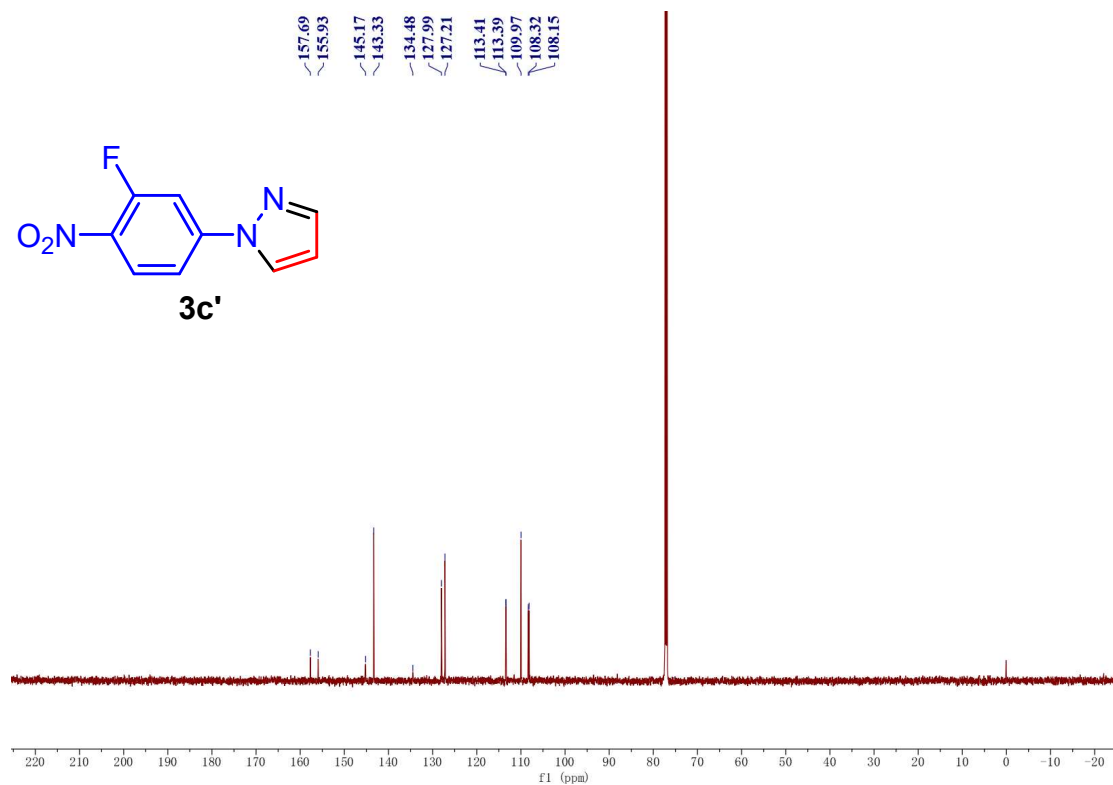

$^{13}\text{C}$  NMR (151 MHz, Chloroform-*d*) spectrum of **3c'**



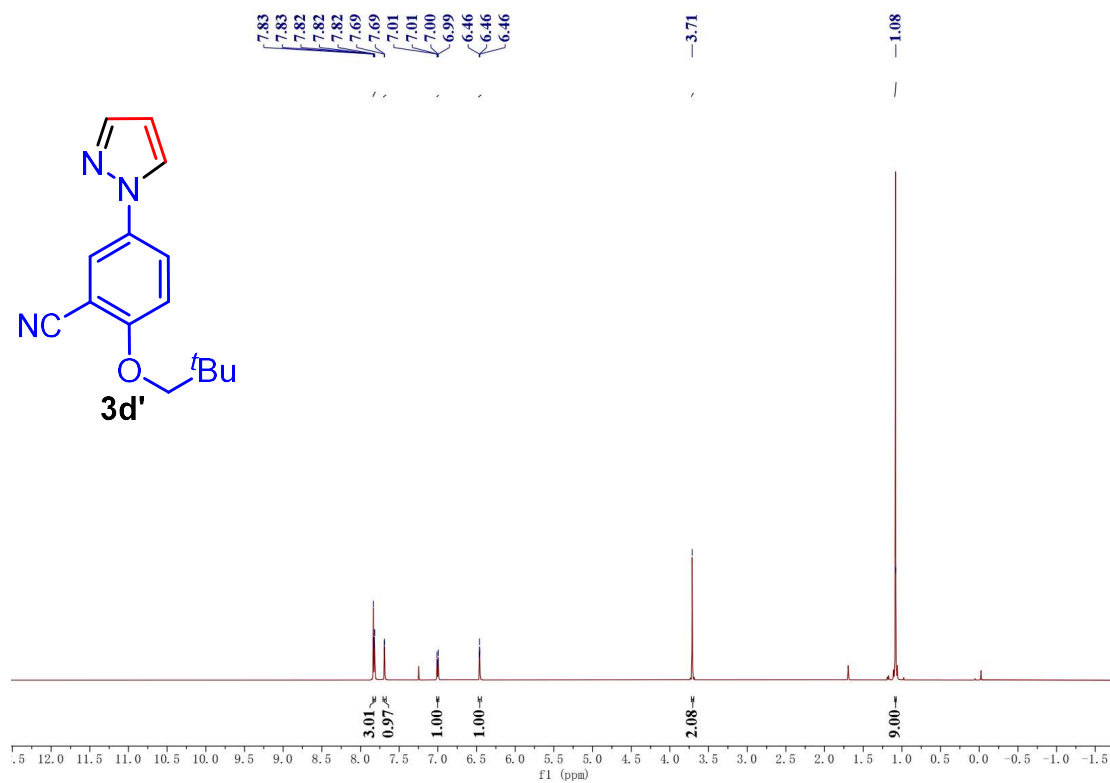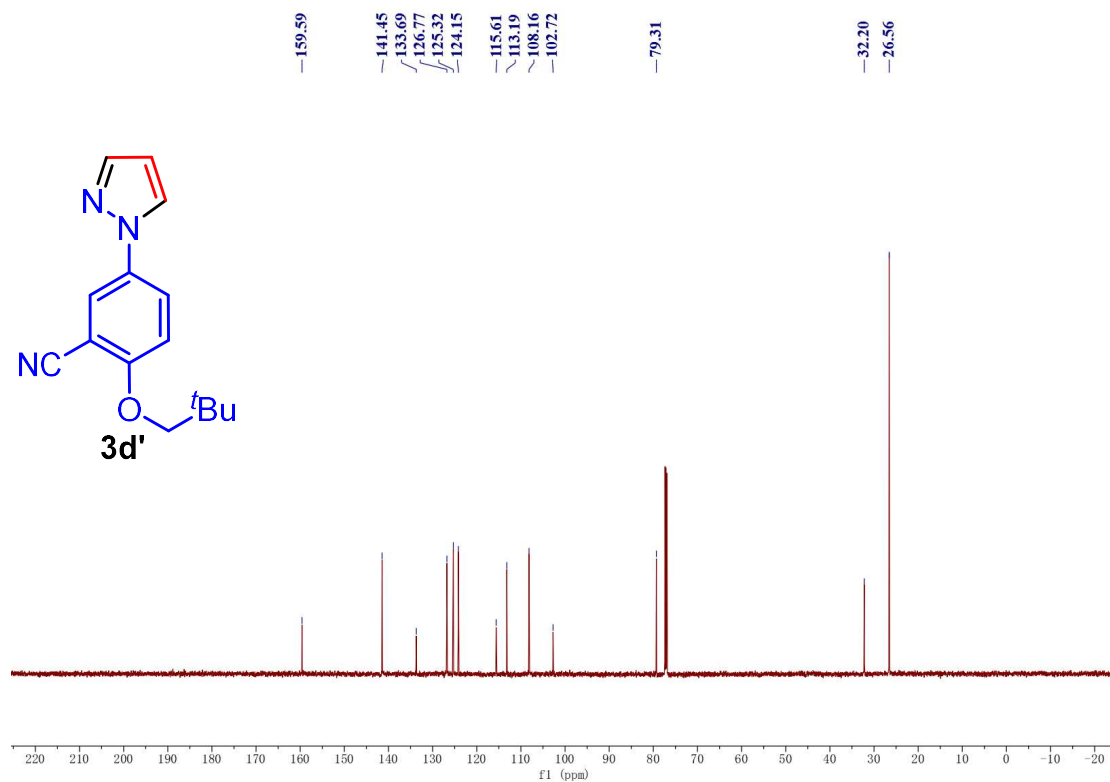

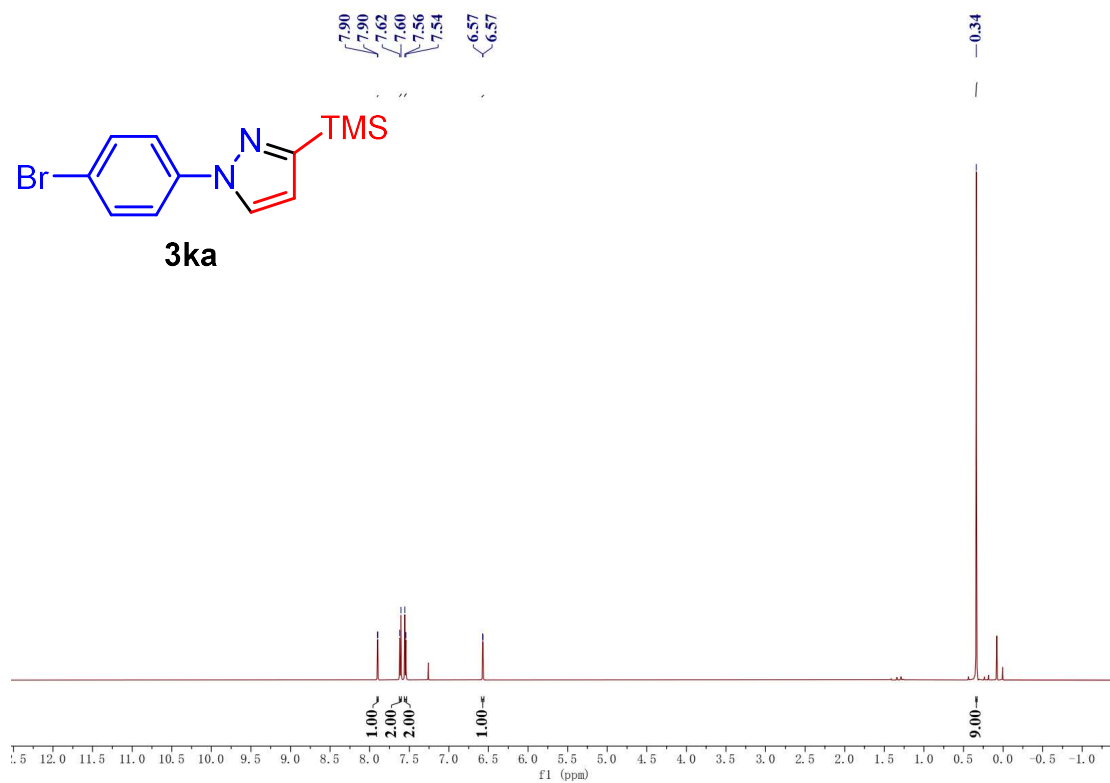

<sup>1</sup>H NMR (600 MHz, Chloroform-*d*) spectrum of **3ka**

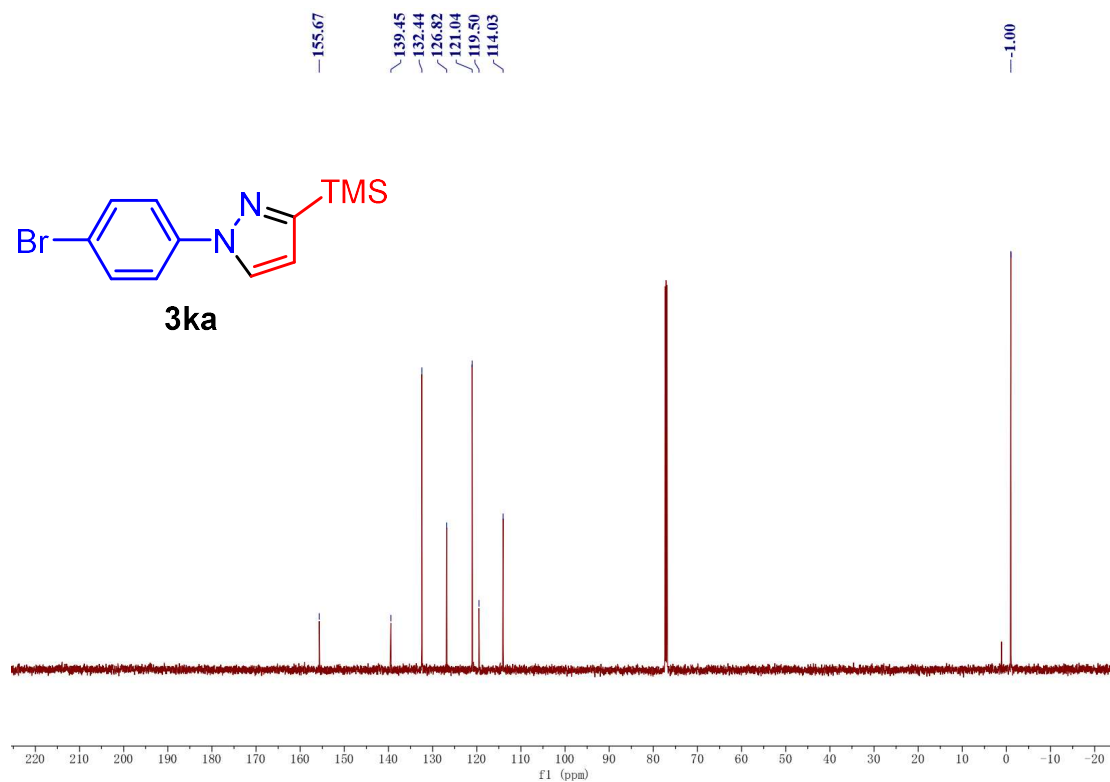

<sup>13</sup>C NMR (151 MHz, Chloroform-*d*) spectrum of **3ka**

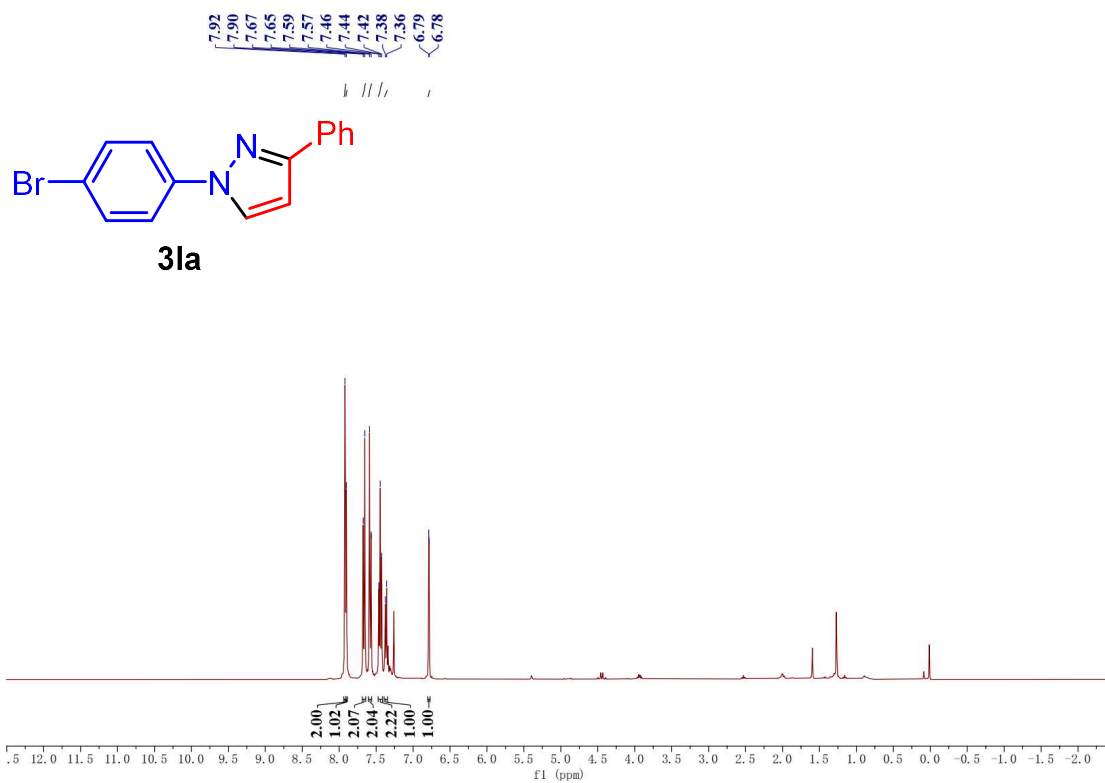

$^1\text{H}$  NMR (400 MHz, Chloroform-*d*) spectrum of **3la**

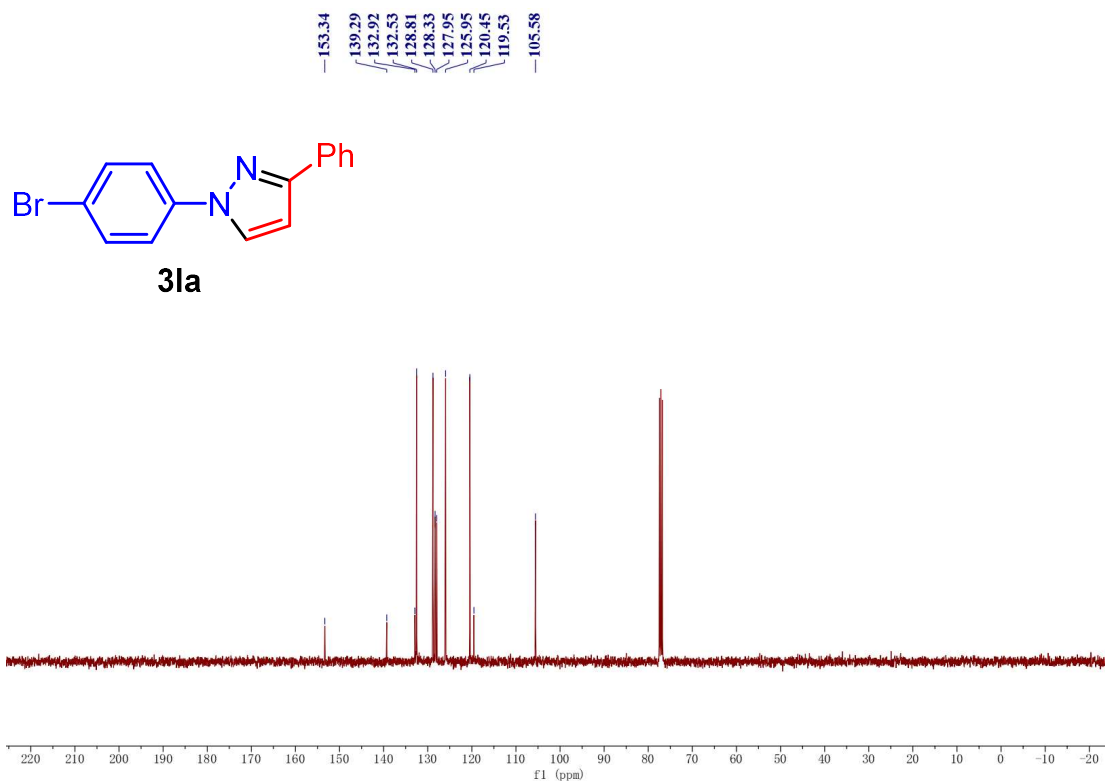

$^{13}\text{C}$  NMR (101 MHz, Chloroform-*d*) spectrum of **3la**

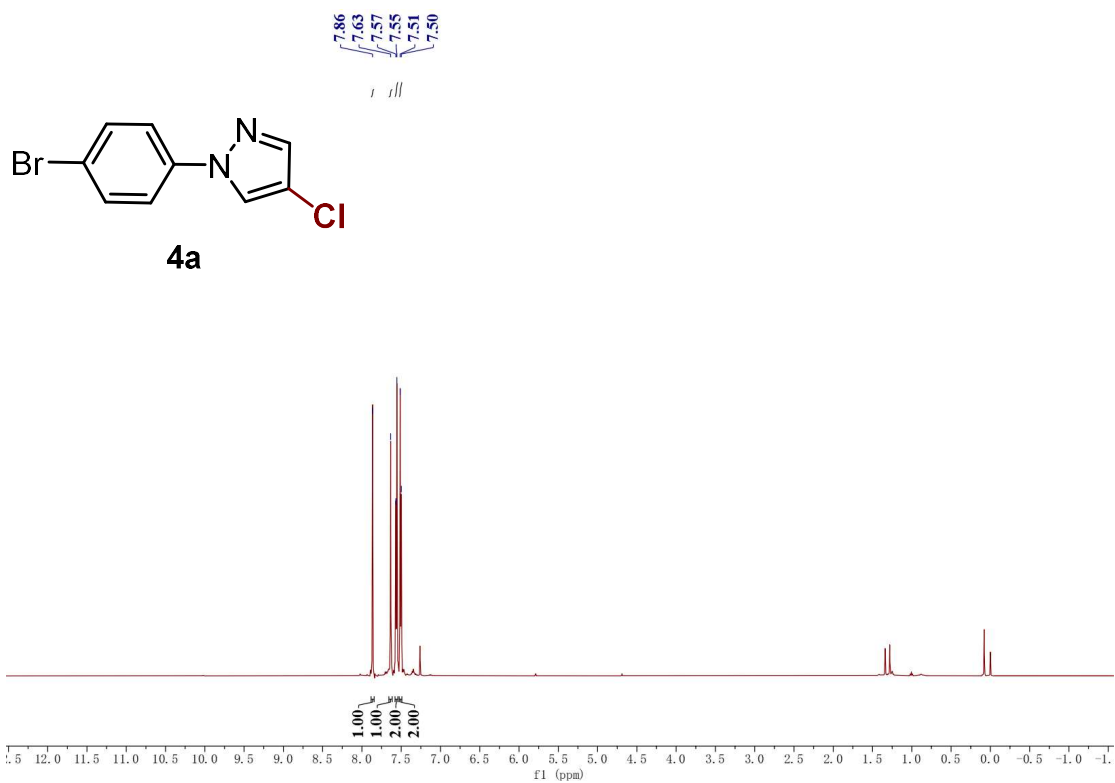

$^1\text{H}$  NMR (600 MHz, Chloroform-*d*) spectrum of **4a**

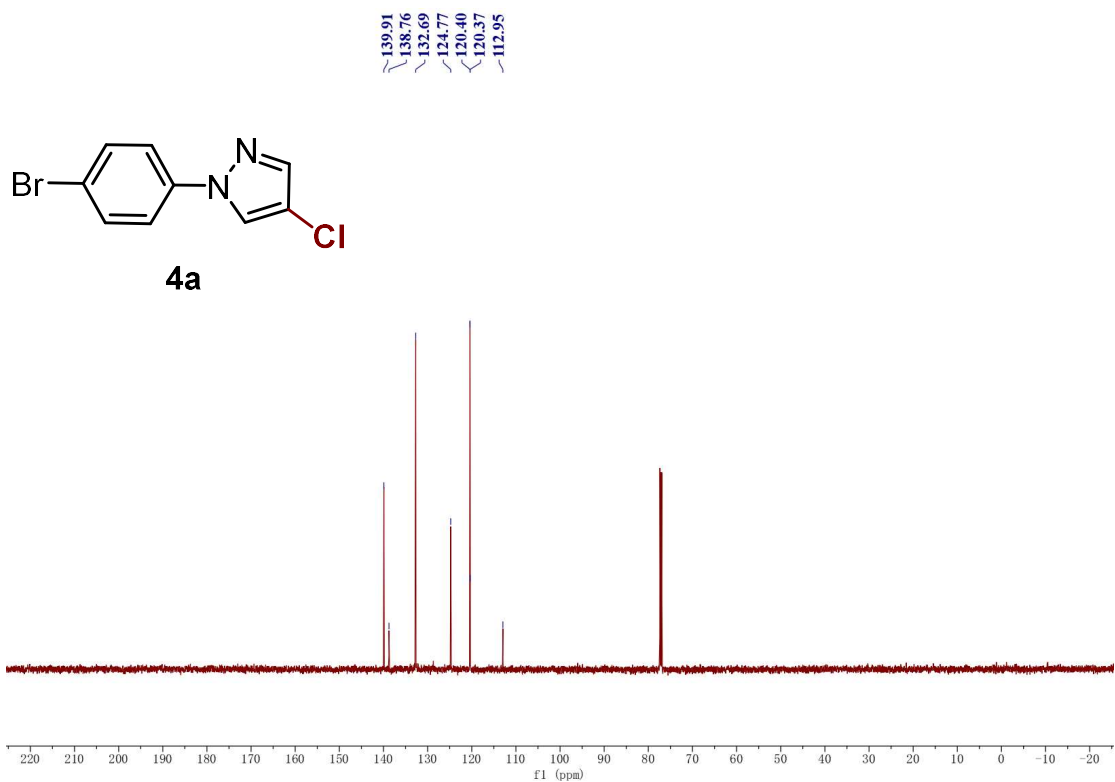

$^{13}\text{C}$  NMR (151 MHz, Chloroform-*d*) spectrum of **4a**

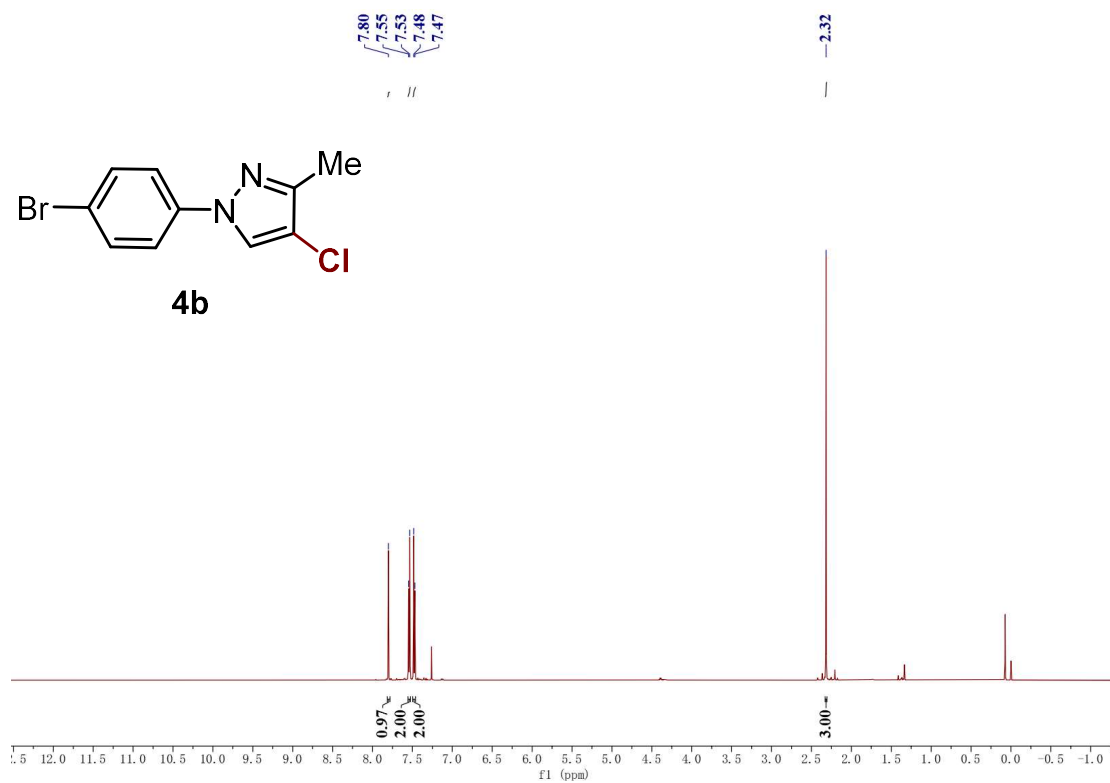

<sup>1</sup>H NMR (600 MHz, Chloroform-*d*) spectrum of **4b**

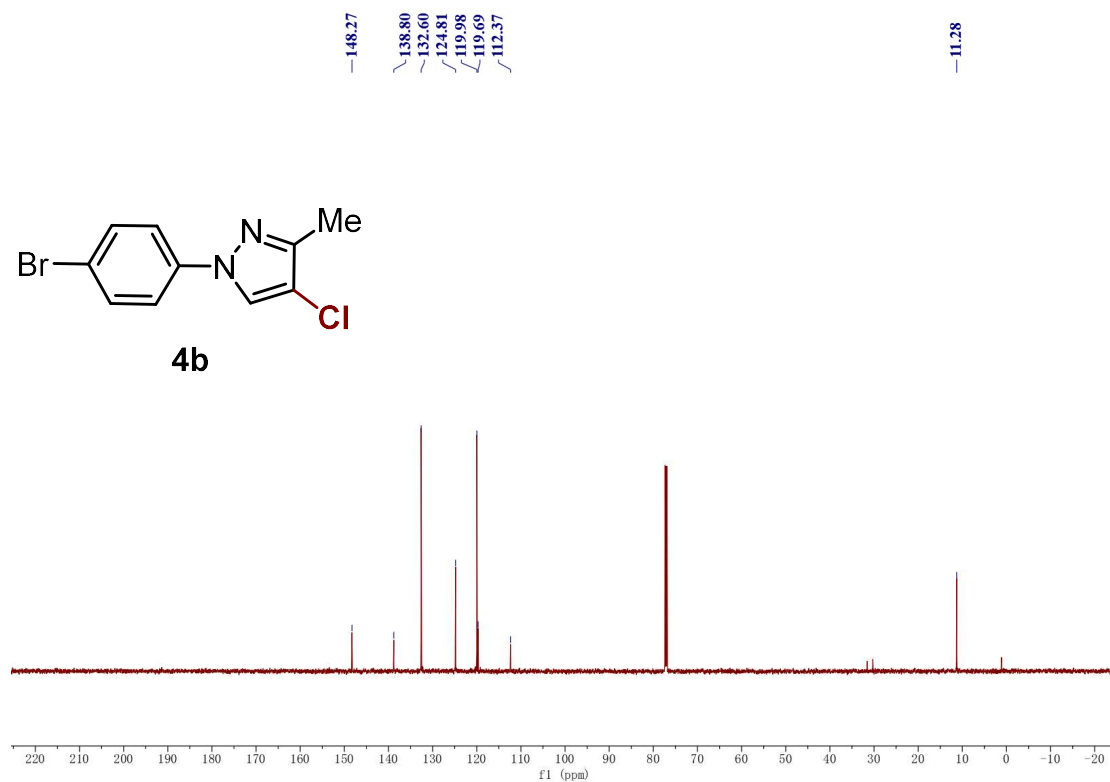

<sup>13</sup>C NMR (151 MHz, Chloroform-*d*) spectrum of **4b**

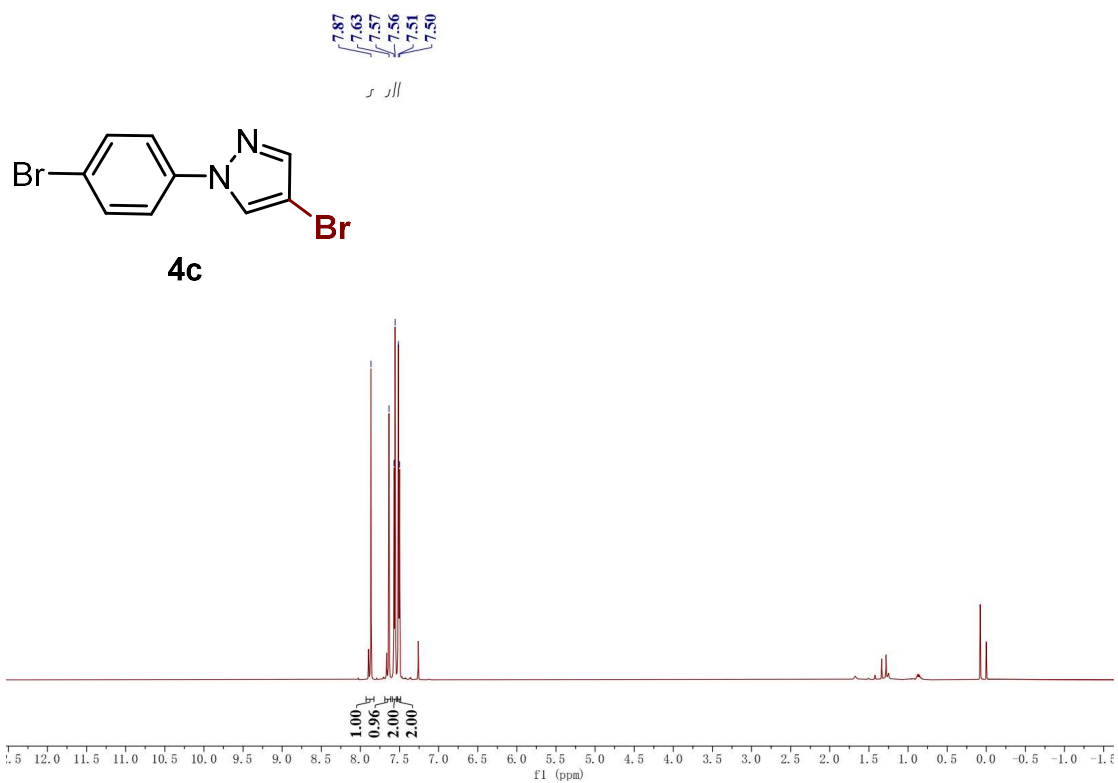

**<sup>1</sup>H NMR (600 MHz, Chloroform-*d*) spectrum of 4c**

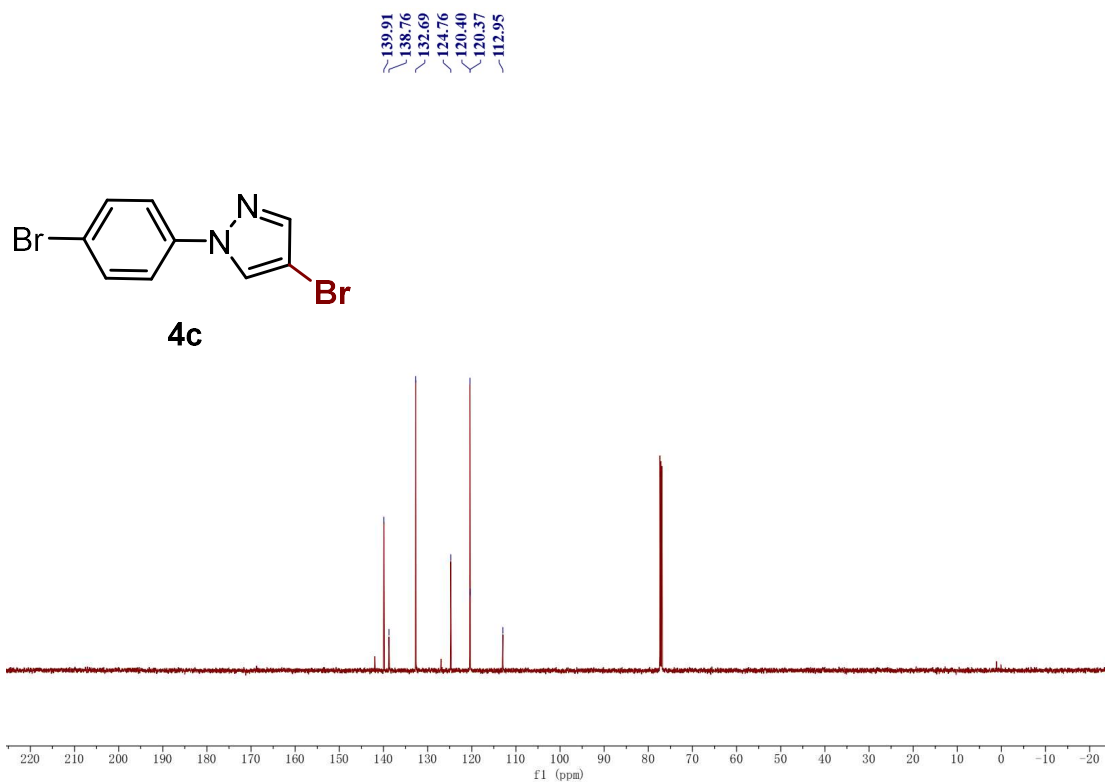

**<sup>13</sup>C NMR (151 MHz, Chloroform-*d*) spectrum of 4c**

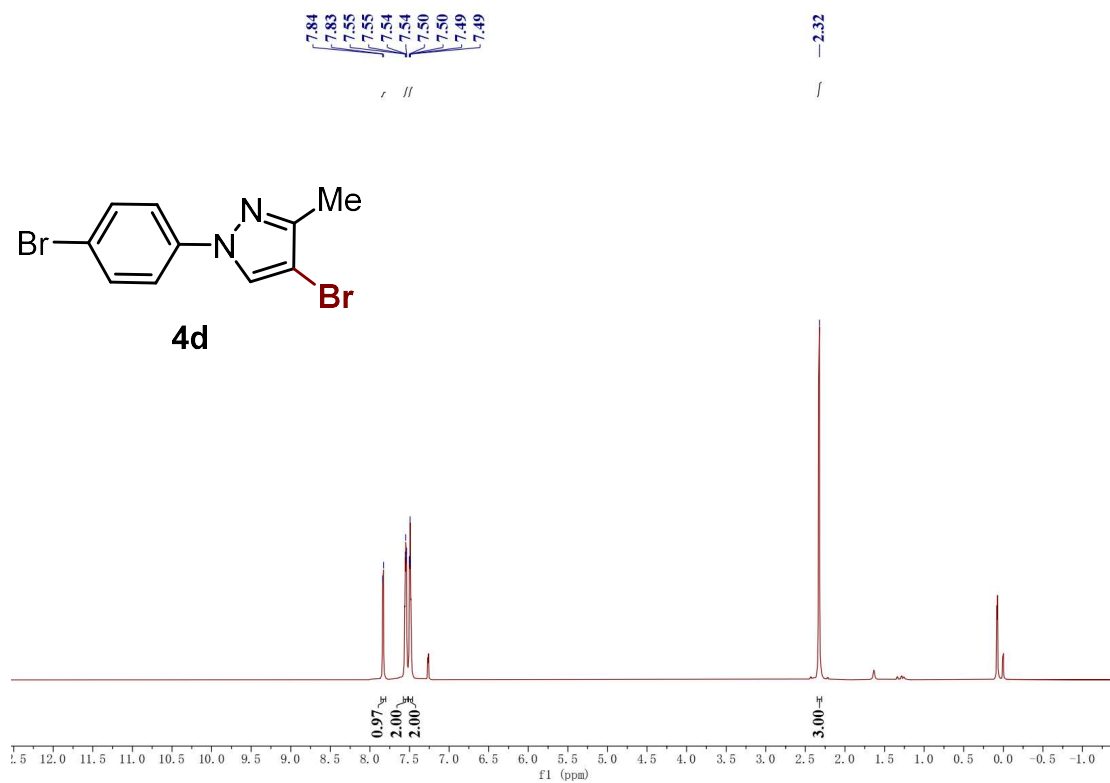

<sup>1</sup>H NMR (600 MHz, Chloroform-*d*) spectrum of **4d**

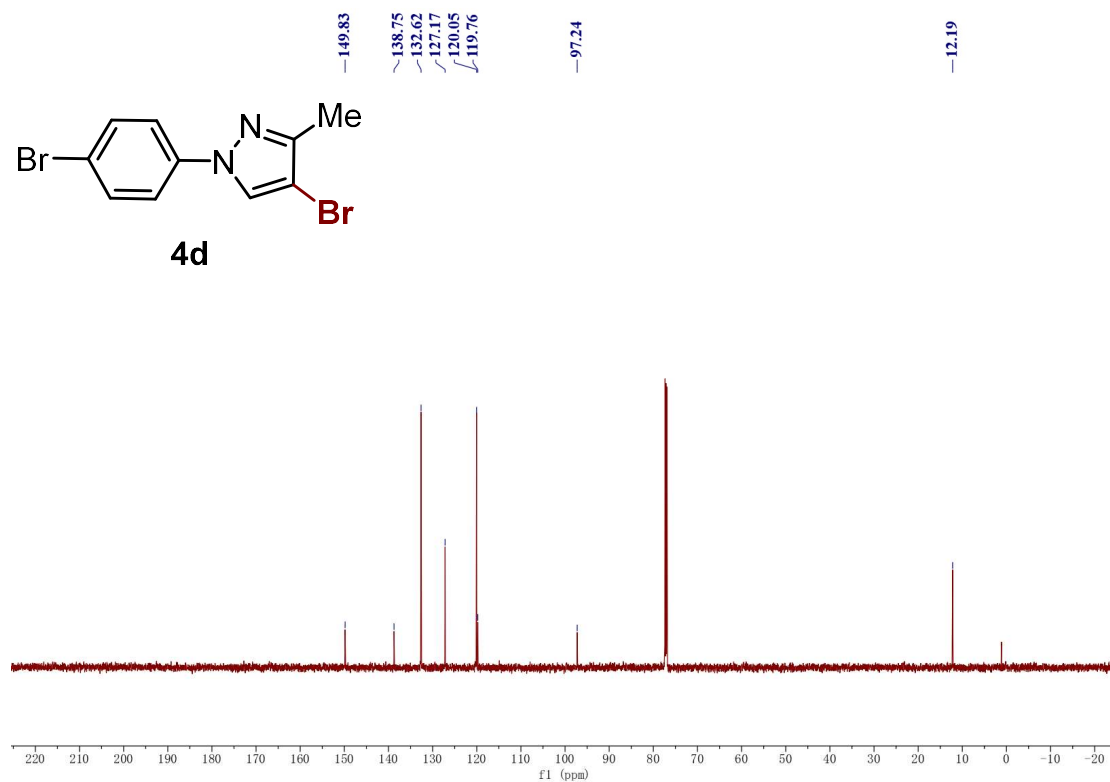

<sup>13</sup>C NMR (151 MHz, Chloroform-*d*) spectrum of **4d**

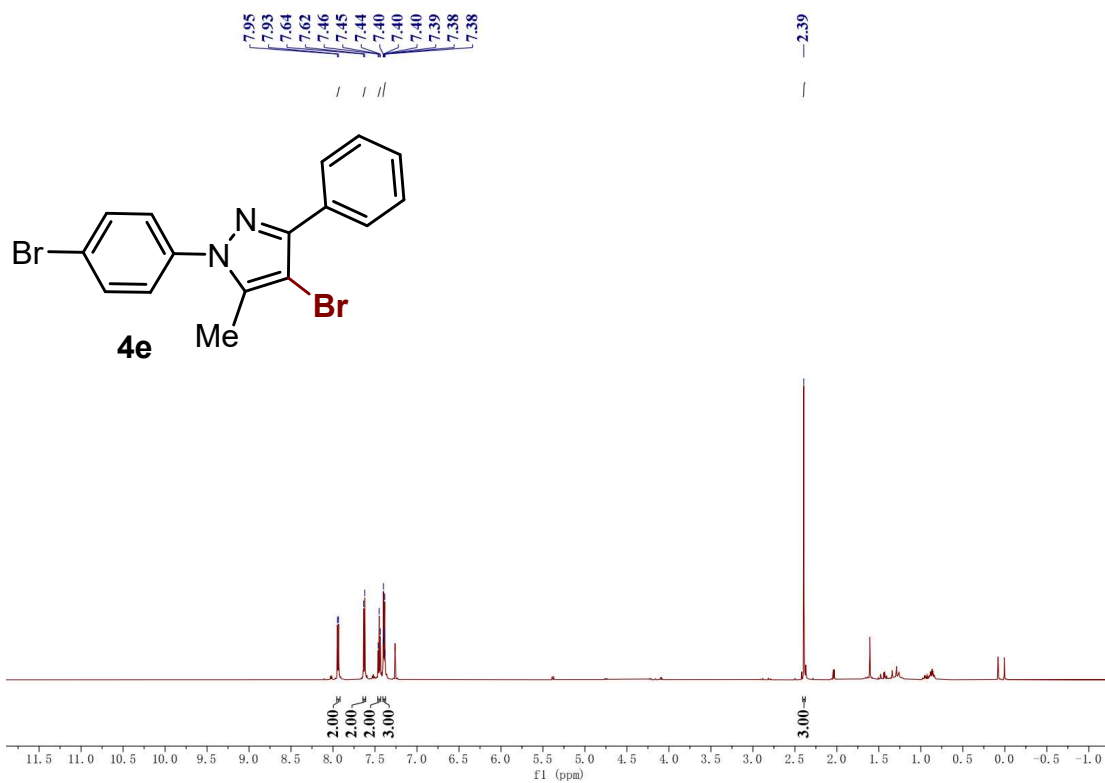

<sup>1</sup>H NMR (600 MHz, Chloroform-*d*) spectrum of **4e**

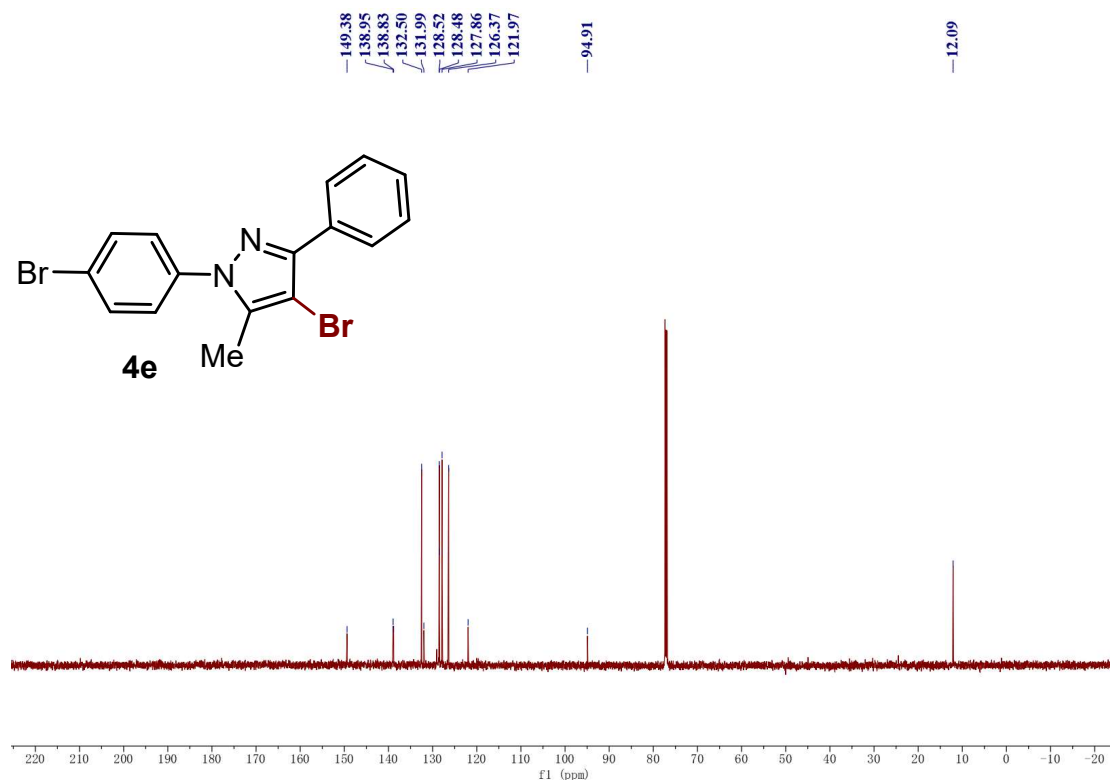

<sup>13</sup>C NMR (151 MHz, Chloroform-*d*) spectrum of **4e**



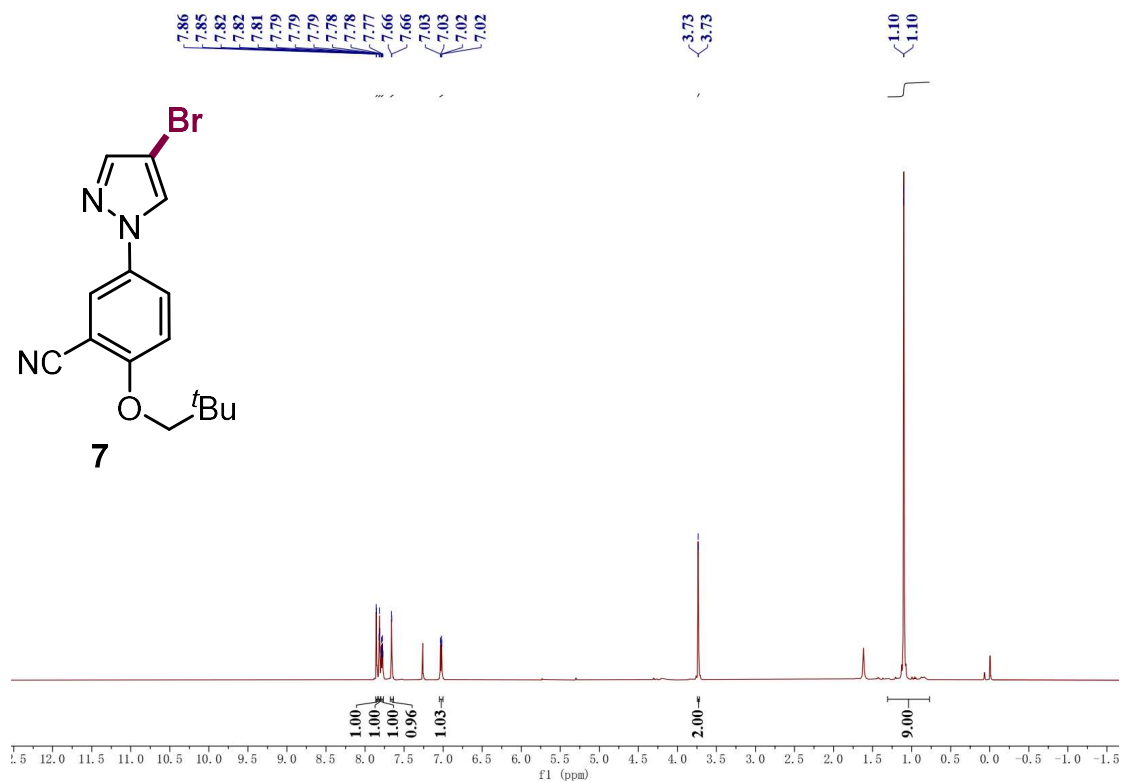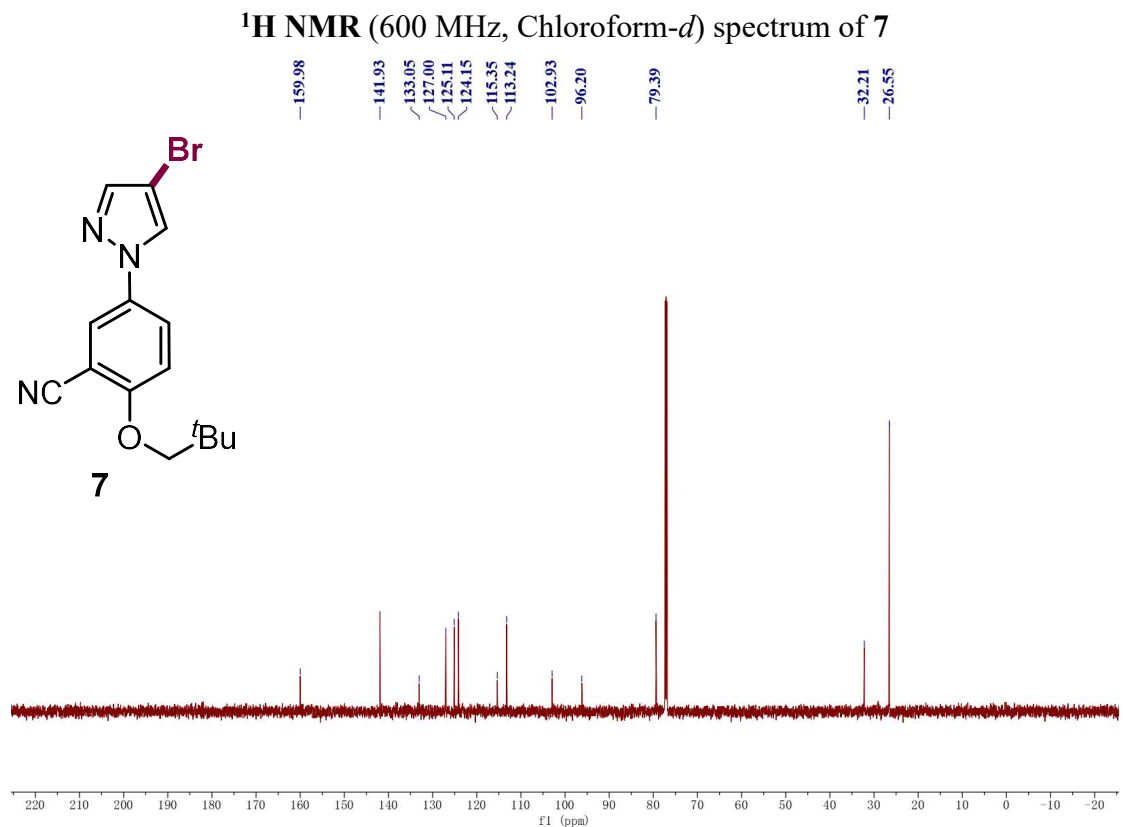

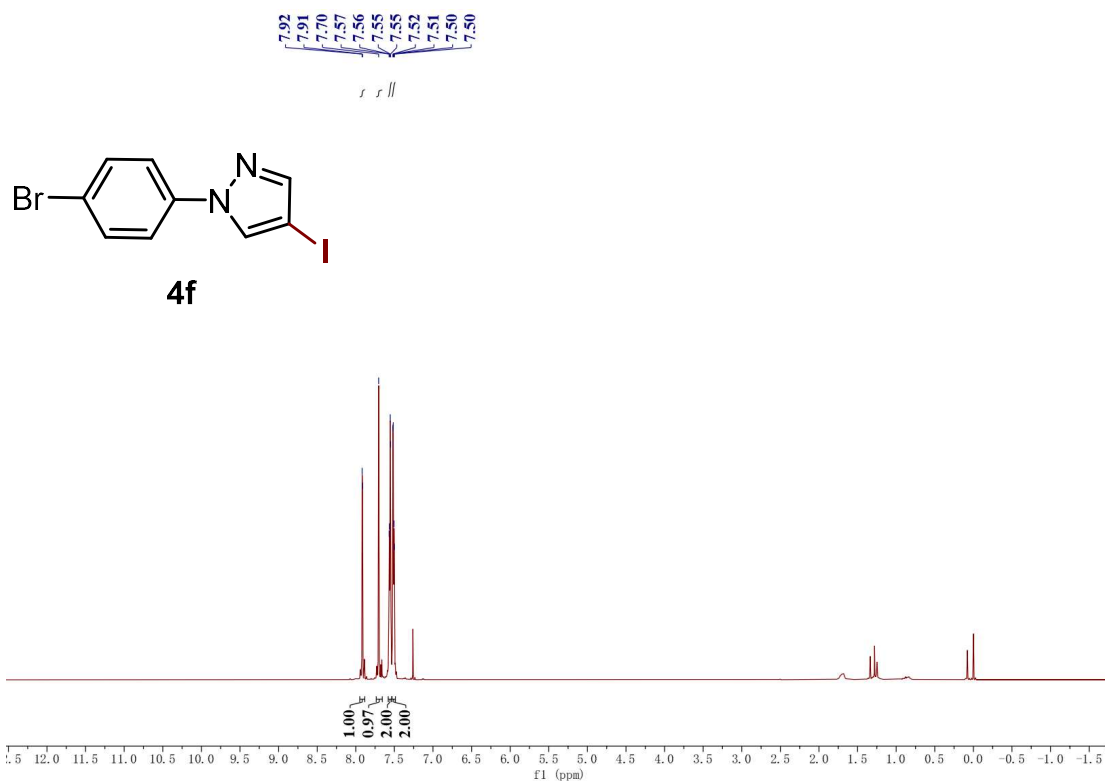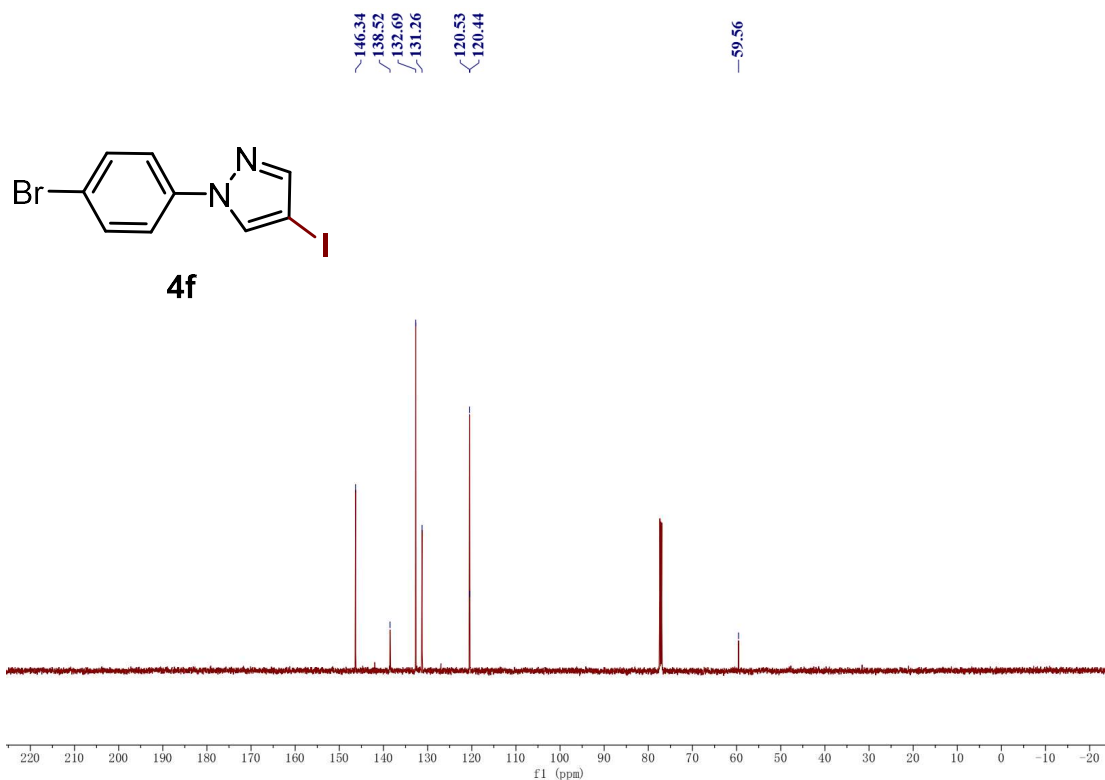

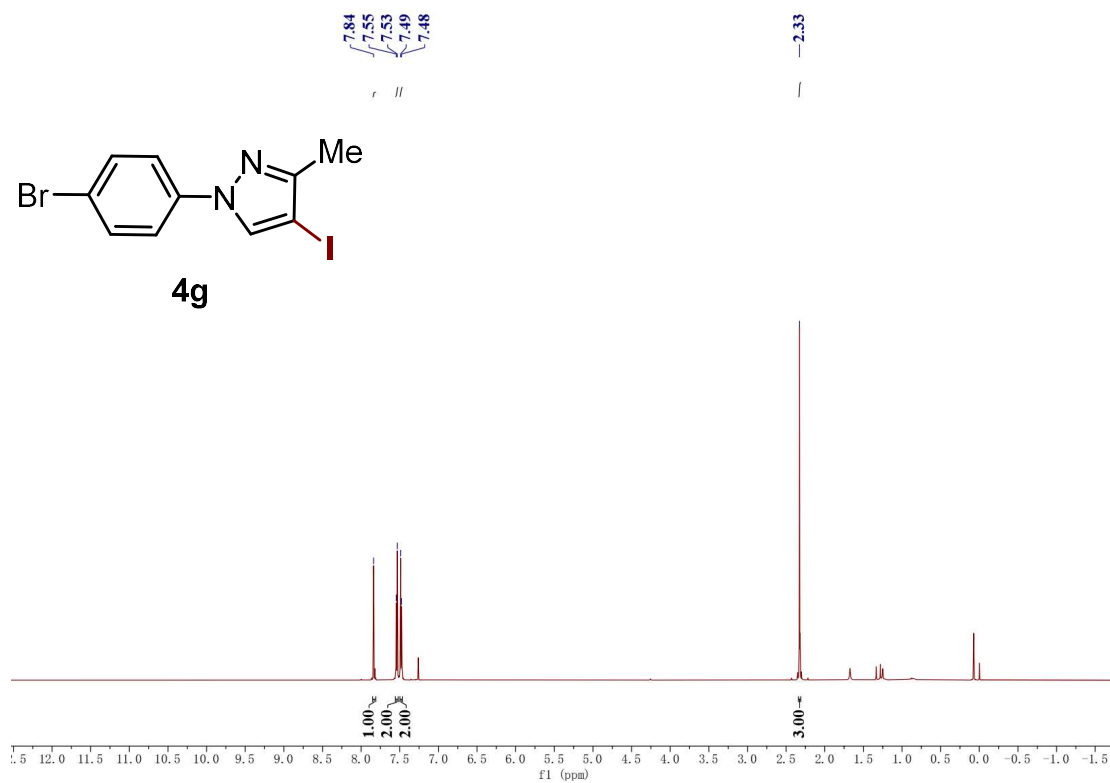

<sup>1</sup>H NMR (600 MHz, Chloroform-*d*) spectrum of **4g**

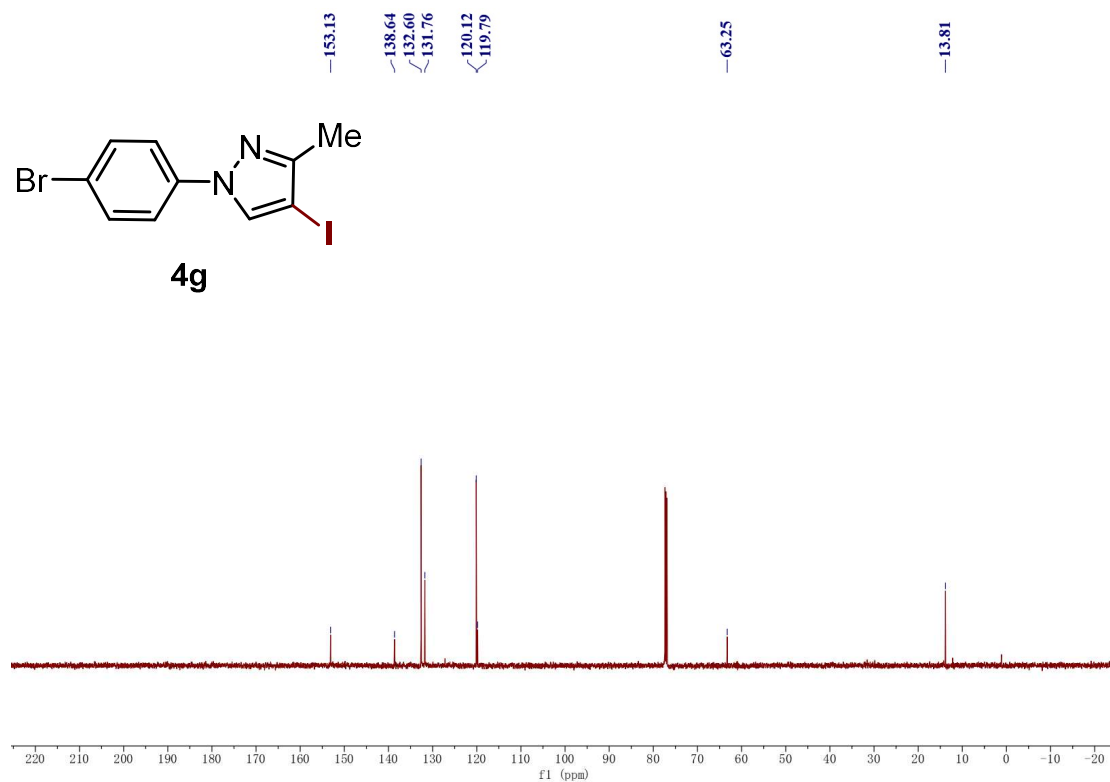

<sup>13</sup>C NMR (151 MHz, Chloroform-*d*) spectrum of **4g**

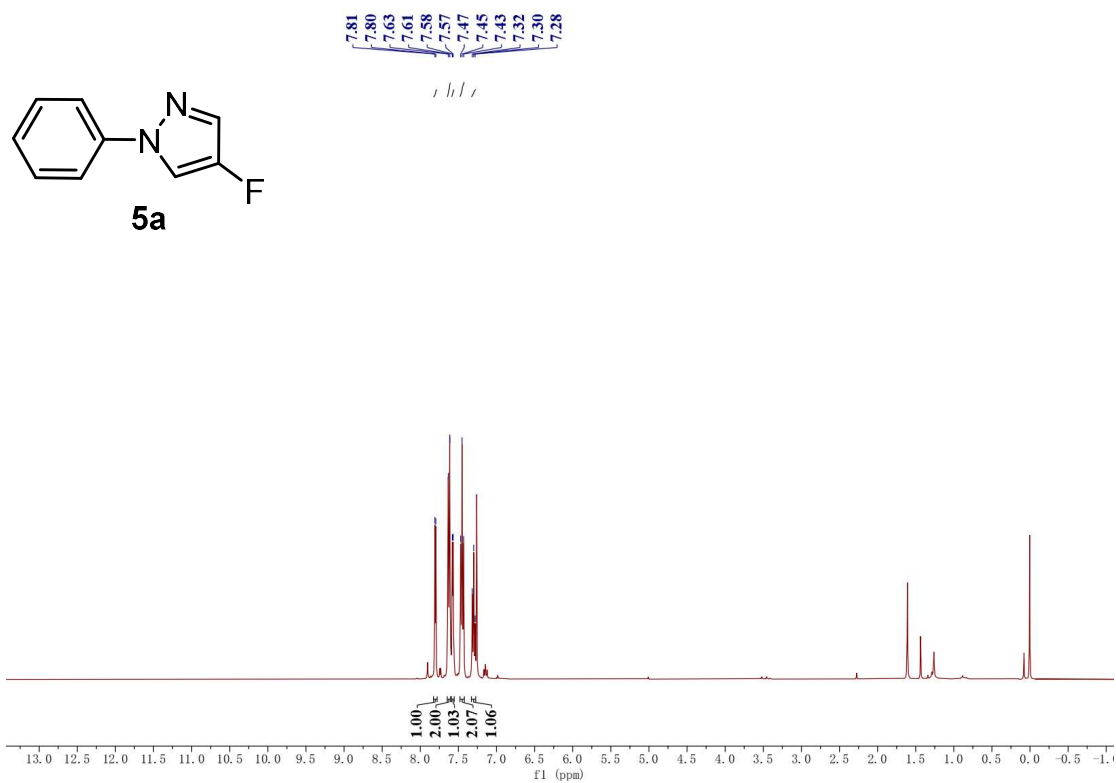

$^1\text{H}$  NMR (400 MHz, Chloroform-*d*) spectrum of **5a**

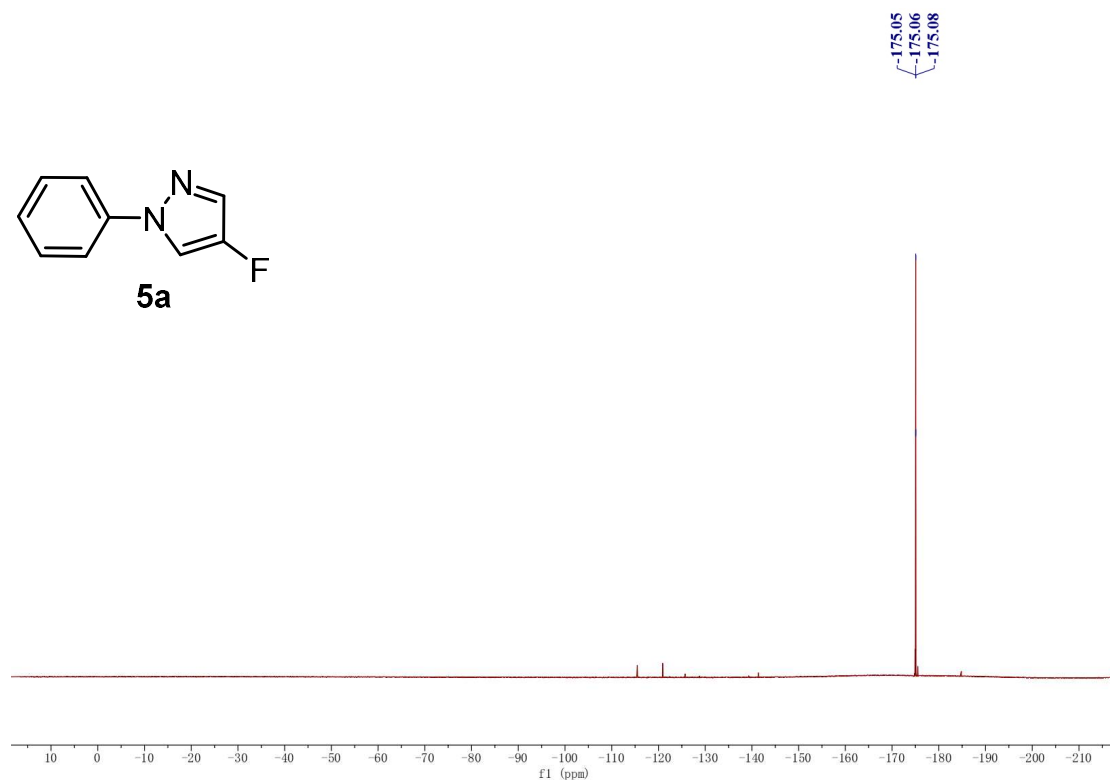

$^{19}\text{F}$  NMR (367 MHz, Chloroform-*d*) spectrum of **5a**

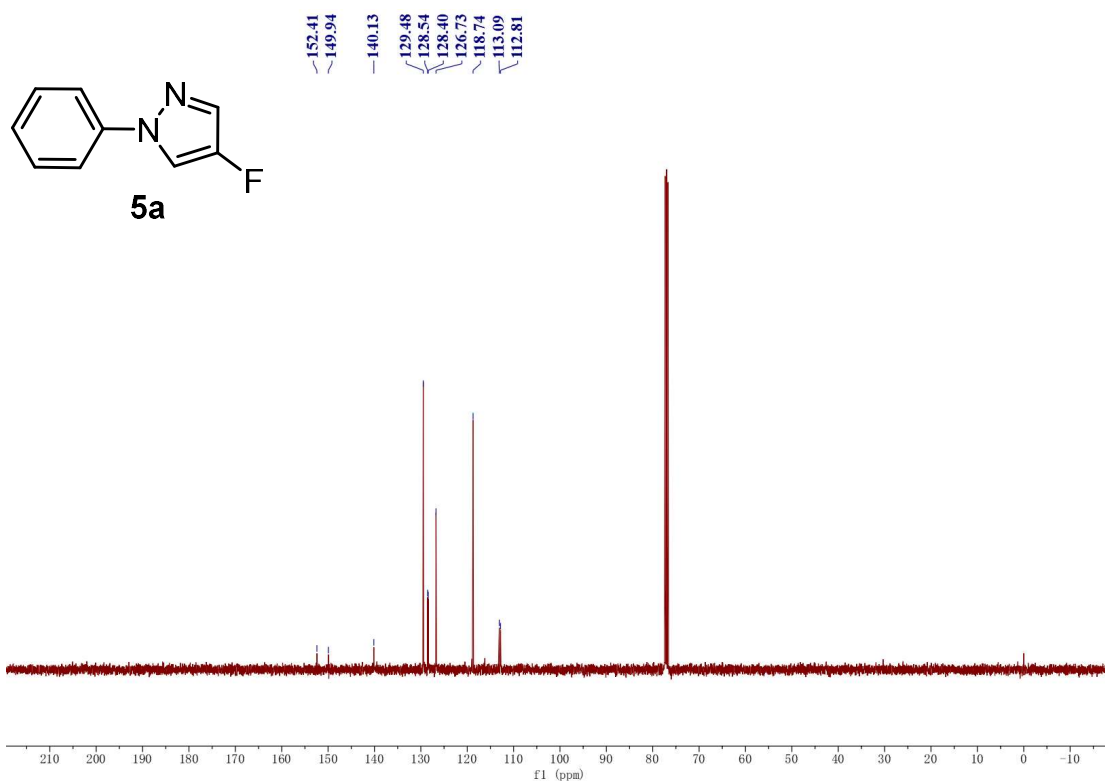

<sup>13</sup>C NMR (101 MHz, Chloroform-*d*) spectrum of **5a**

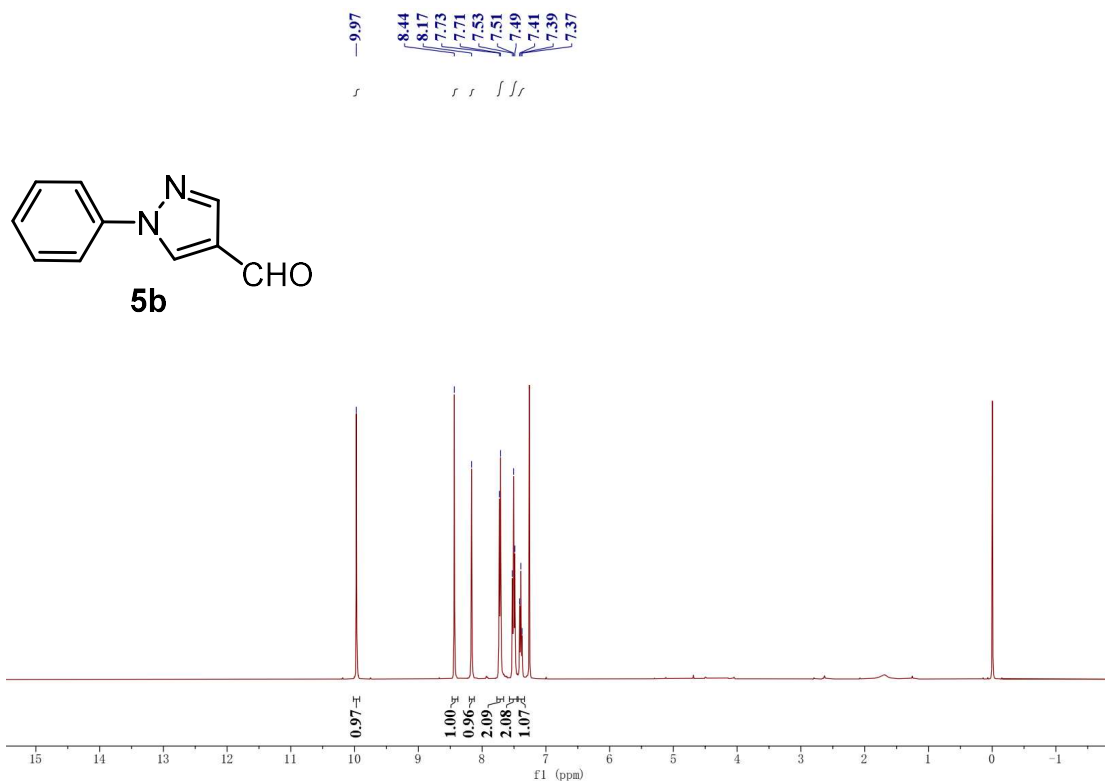

<sup>1</sup>H NMR (400 MHz, Chloroform-*d*) spectrum of **5b**

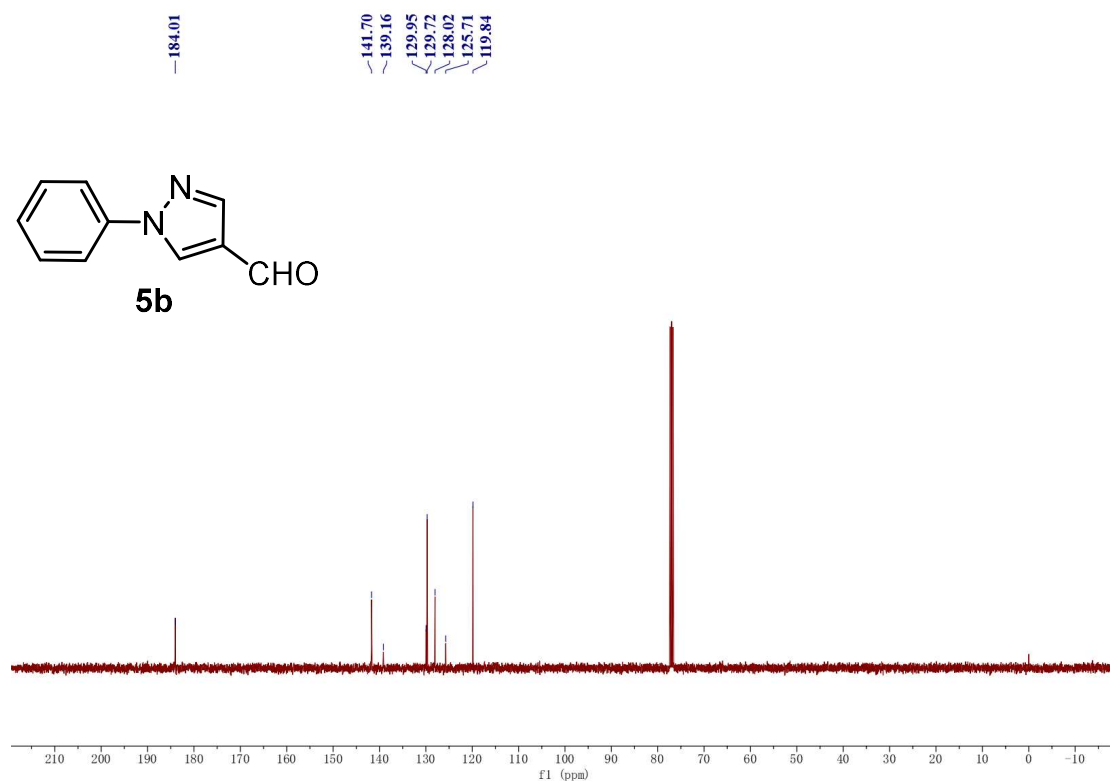

<sup>13</sup>C NMR (101 MHz, Chloroform-*d*) spectrum of **5b**

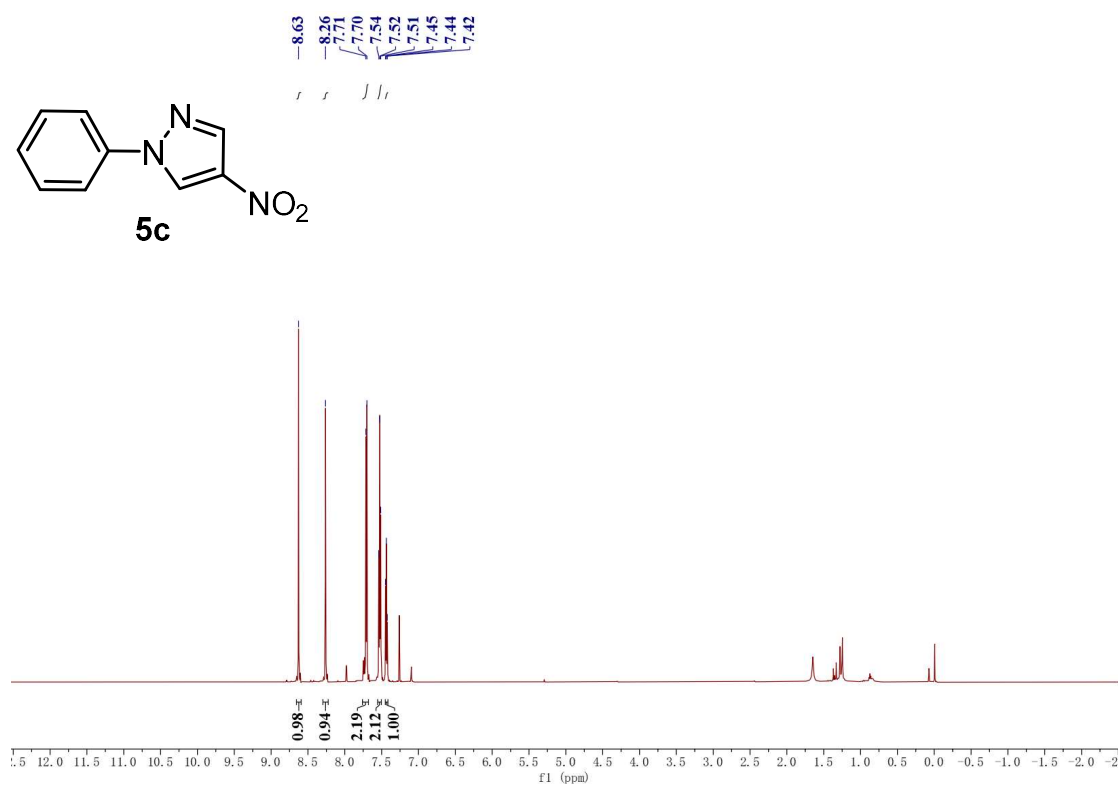

<sup>1</sup>H NMR (600 MHz, Chloroform-*d*) spectrum of **5c**

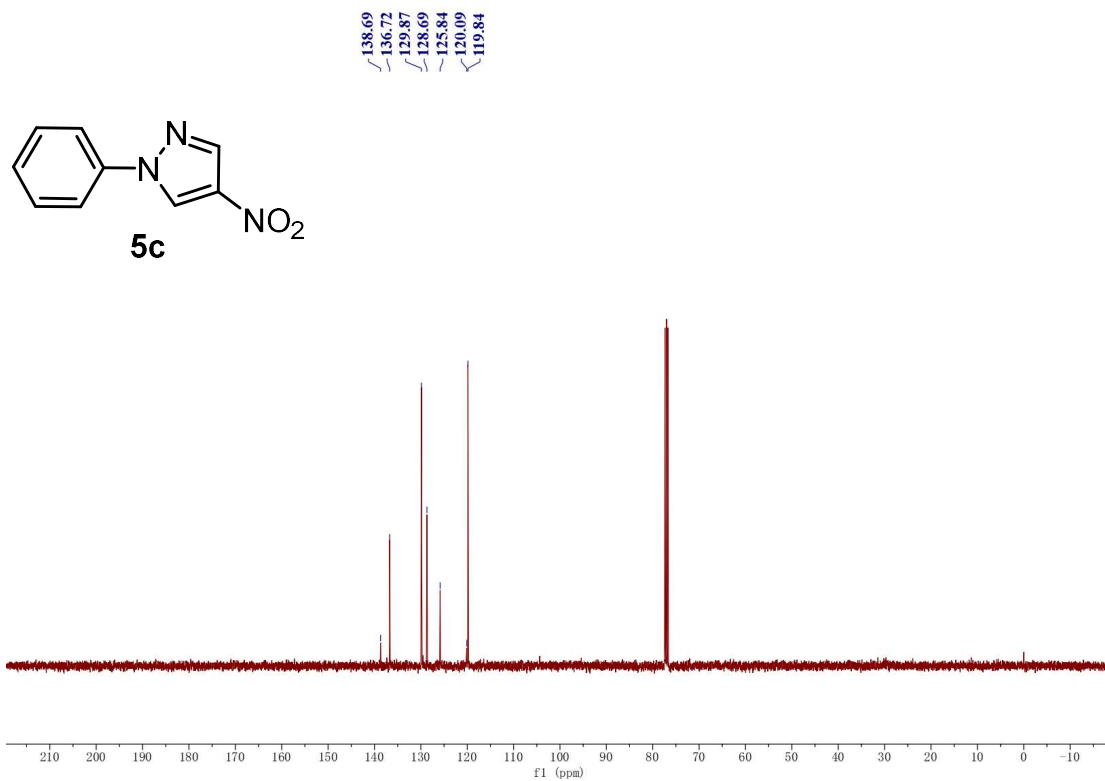

<sup>13</sup>C NMR (101 MHz, Chloroform-*d*) spectrum of **5c**

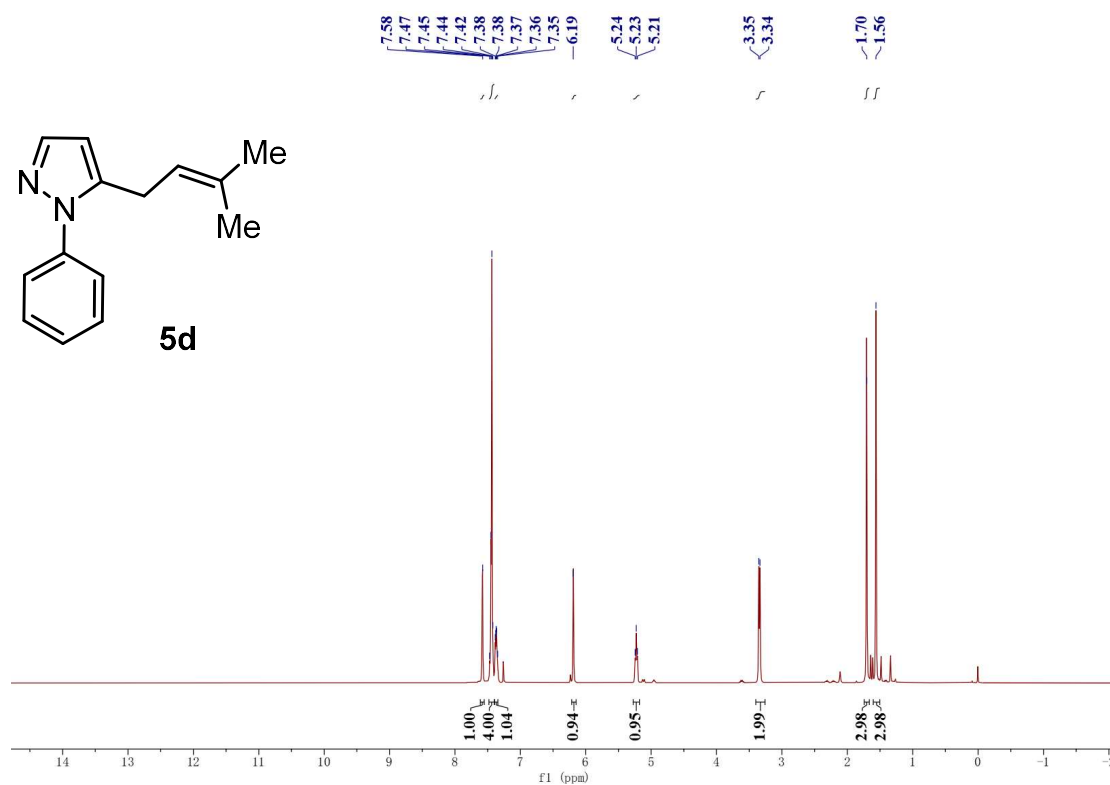

<sup>1</sup>H NMR (400 MHz, Chloroform-*d*) spectrum of **5d**

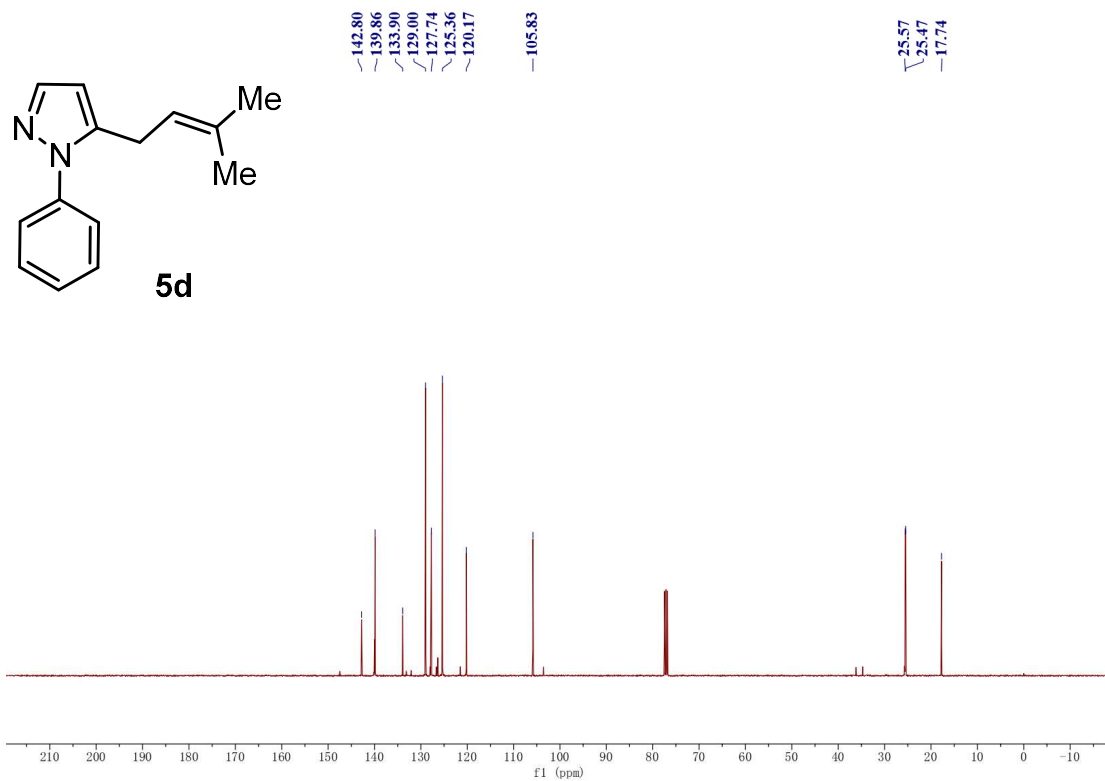

$^{13}\text{C}$  NMR (101 MHz, Chloroform-*d*) spectrum of **5d**

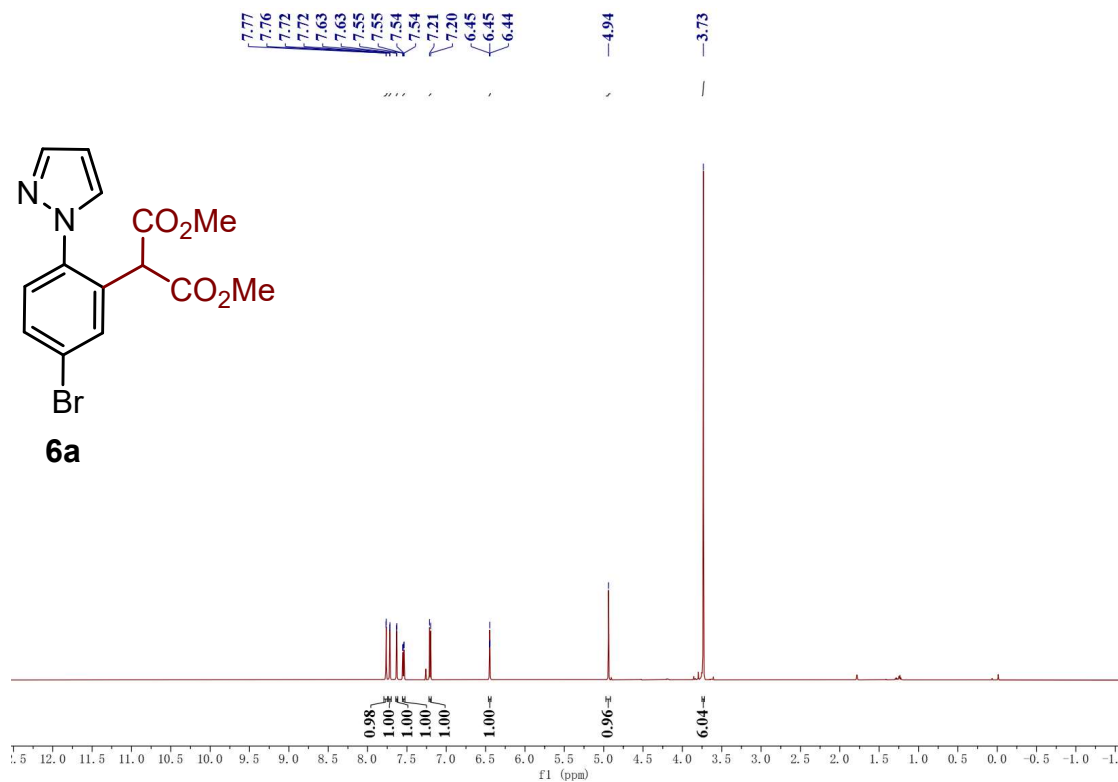

$^1\text{H}$  NMR (600 MHz, Chloroform-*d*) spectrum of **6a**



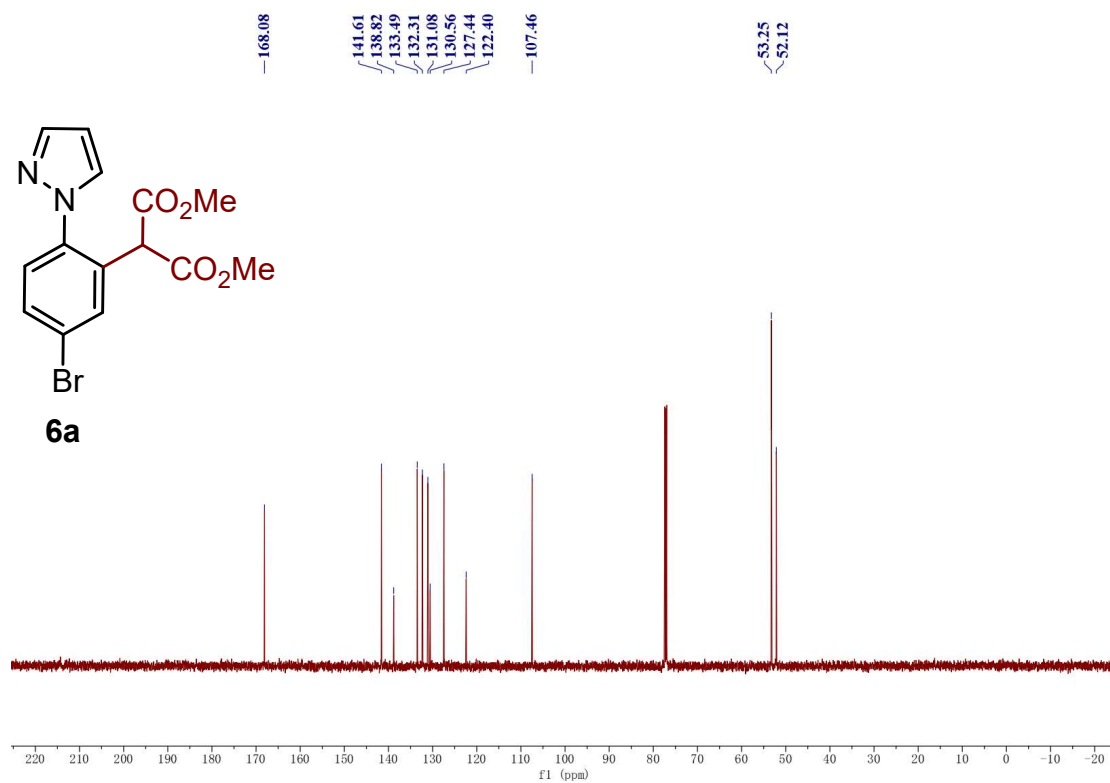

$^{13}\text{C}$  NMR (151 MHz, Chloroform-*d*) spectrum of **6a**

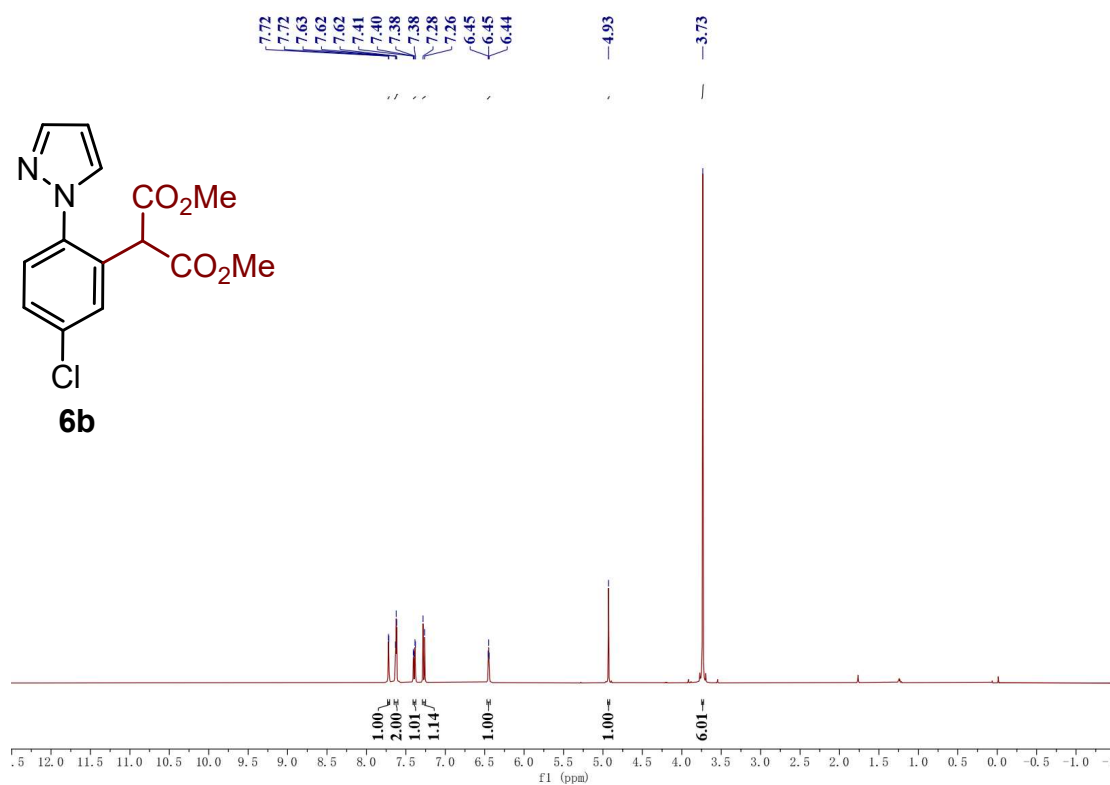

$^1\text{H}$  NMR (400 MHz, Chloroform-*d*) spectrum of **6b**

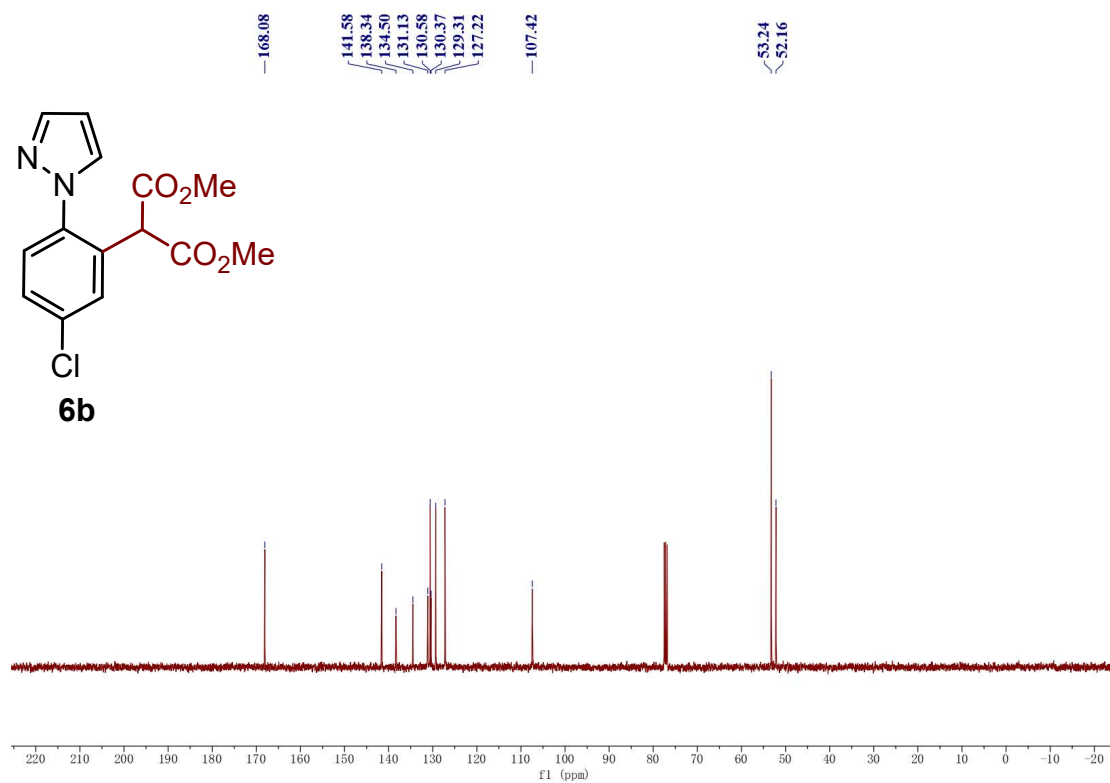

<sup>13</sup>C NMR (101 MHz, Chloroform-*d*) spectrum of **6b**

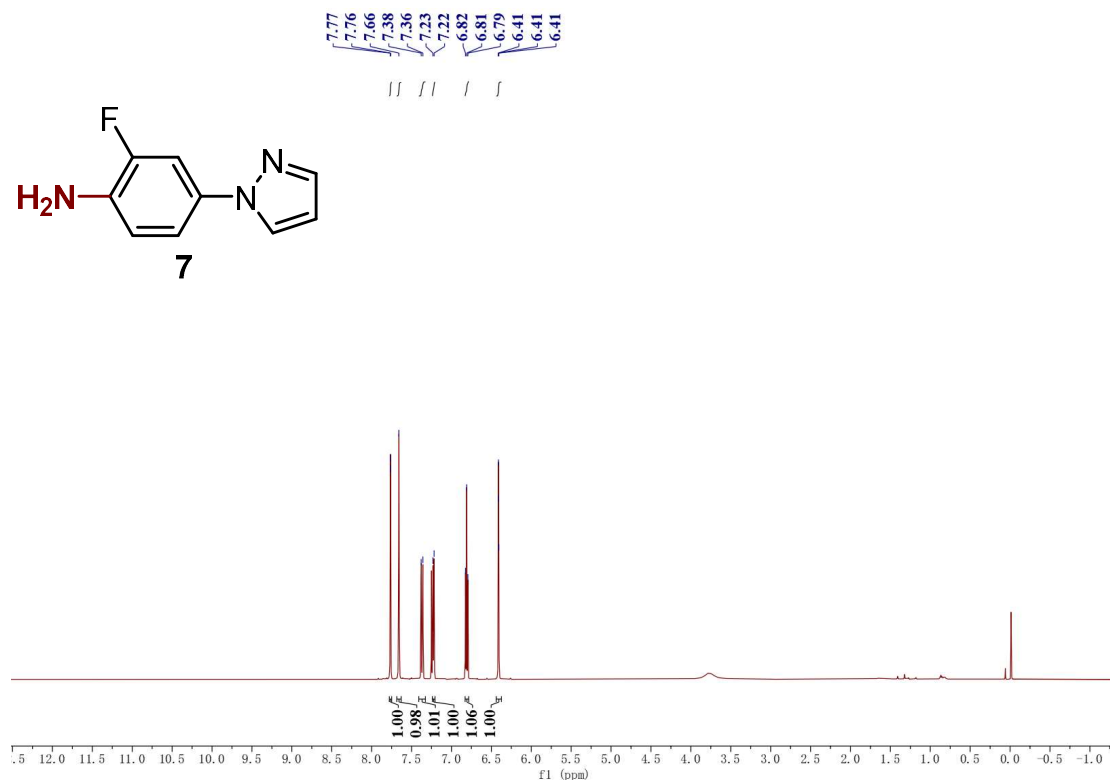

<sup>1</sup>H NMR (600 MHz, Chloroform-*d*) spectrum of **7**

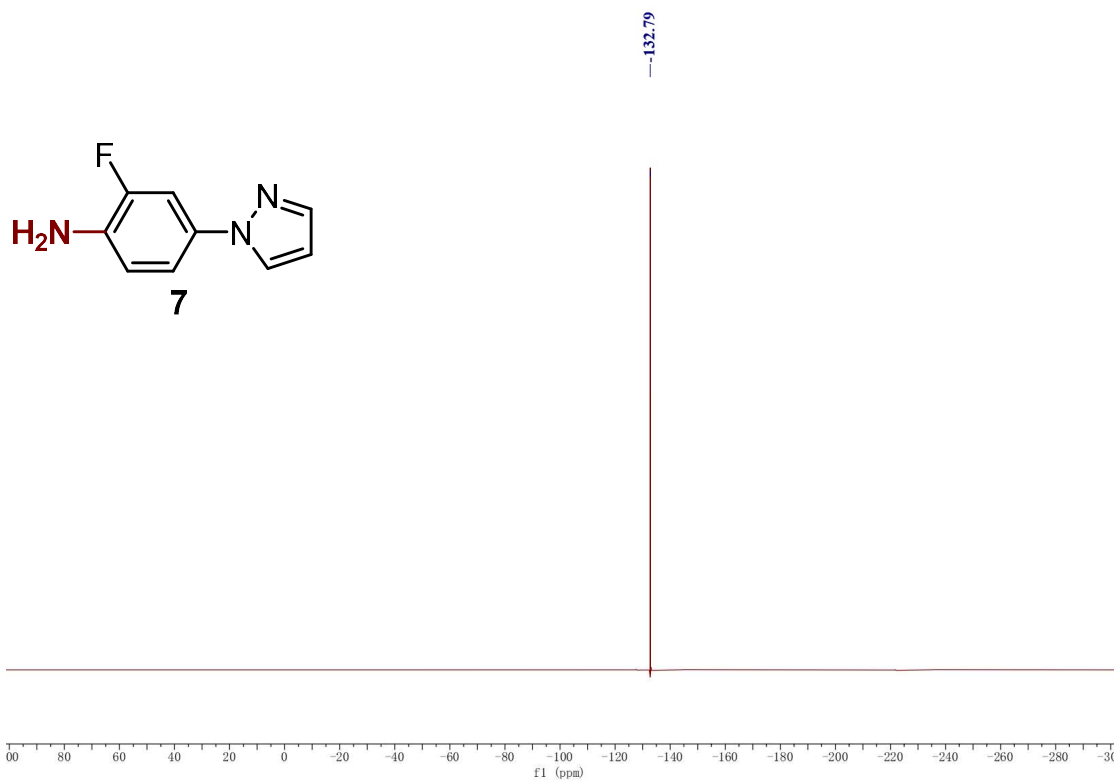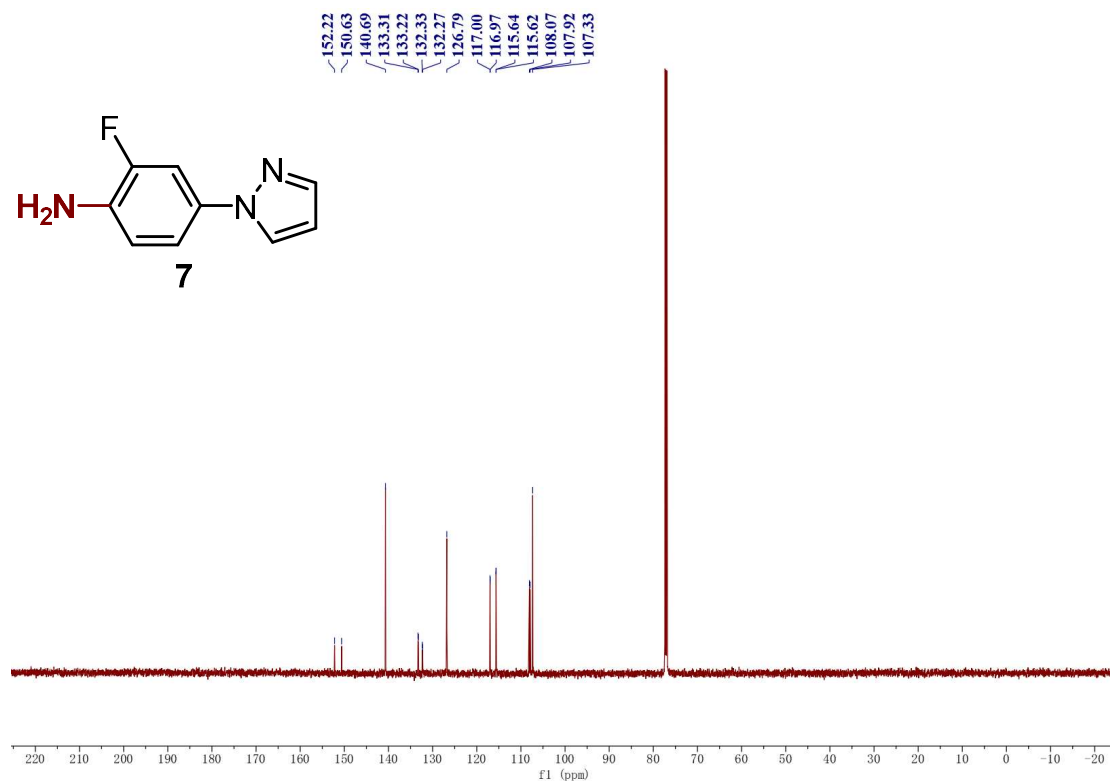

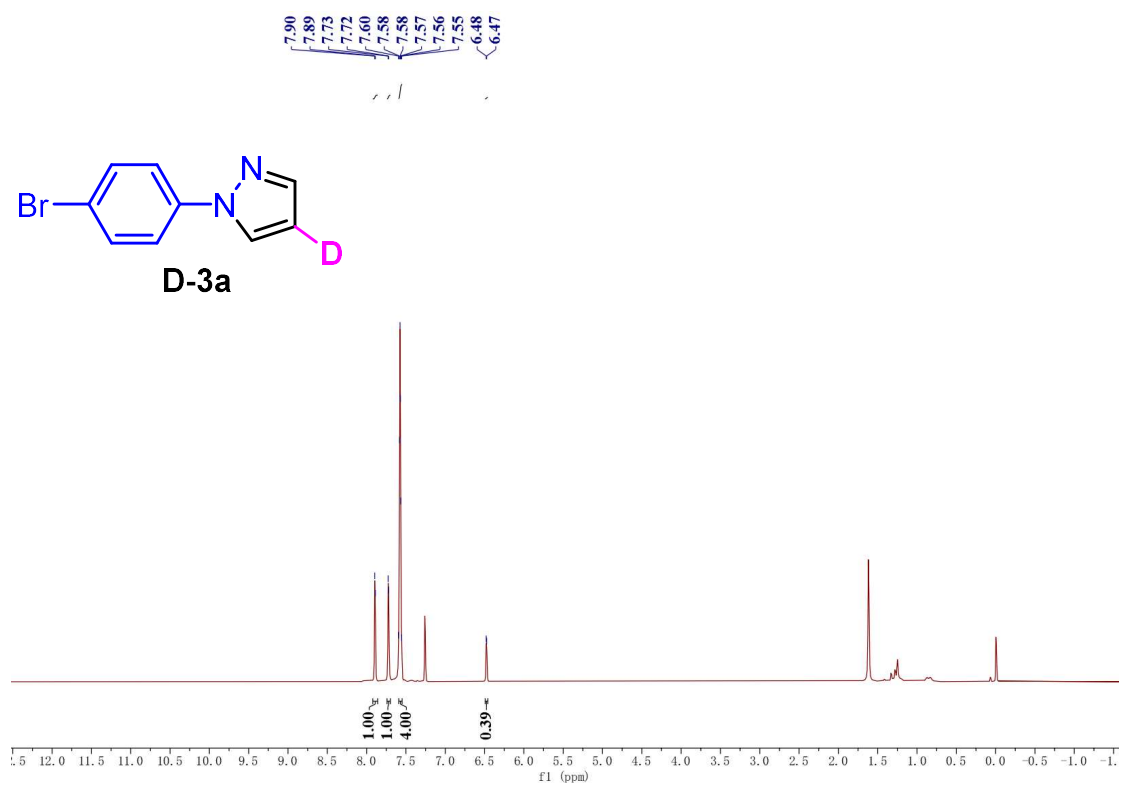

<sup>1</sup>H NMR (600 MHz, Chloroform-*d*) spectrum of **D-3a**

## X-Ray crystallographic data

For the crystallization process, vacuum dried pure sample for **3r**, **3ha** and **3la** (around 20-30 mg) was taken in a vial and dissolved in 1 mL of DCM and 5 mL hexane. The vial was kept around room temperature for slow evaporation. After 1-2 days, we could find colorless, needle shape crystal, which was picked up from the vial and performed single crystal XRD study.

The X-ray crystallographic structures for **3r**, **3ha** and **3la**. ORTEP representation with 50% probability thermal ellipsoids. Solvent is omitted for clarity. Crystal data have been deposited to CCDC, number 2090718, 2090719 and 2090720.

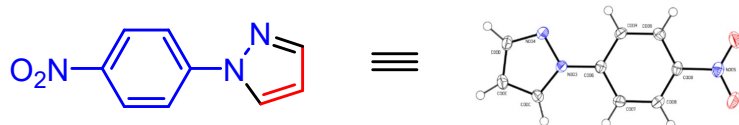

**3r**

|                                    |                                                               |
|------------------------------------|---------------------------------------------------------------|
| Empirical formula                  | C <sub>9</sub> H <sub>7</sub> N <sub>3</sub> O <sub>2</sub>   |
| Formula weight                     | 189.18                                                        |
| Temperature/K                      | 296.15                                                        |
| Crystal system                     | monoclinic                                                    |
| Space group                        | P2 <sub>1</sub> /n                                            |
| a/Å                                | 6.9272(4)                                                     |
| b/Å                                | 10.2579(6)                                                    |
| c/Å                                | 11.4955(6)                                                    |
| α/°                                | 90                                                            |
| β/°                                | 93.872(2)                                                     |
| γ/°                                | 90                                                            |
| Volume/Å <sup>3</sup>              | 814.99(8)                                                     |
| Z                                  | 4                                                             |
| ρ <sub>calc</sub> /cm <sup>3</sup> | 1.542                                                         |
| μ/mm <sup>-1</sup>                 | 0.114                                                         |
| F(000)                             | 392.0                                                         |
| Crystal size/mm <sup>3</sup>       | 0.29 × 0.23 × 0.18                                            |
| Radiation                          | MoKα (λ = 0.71073)                                            |
| 2θ range for data collection/°     | 5.328 to 50.04                                                |
| Index ranges                       | -8 ≤ h ≤ 8, -12 ≤ k ≤ 12, -13 ≤ l ≤ 13                        |
| Reflections collected              | 15108                                                         |
| Independent reflections            | 1437 [R <sub>int</sub> = 0.1380, R <sub>sigma</sub> = 0.0439] |
| Data/restraints/parameters         | 1437/0/127                                                    |
| Goodness-of-fit on F <sup>2</sup>  | 1.079                                                         |

|                                                |                                  |
|------------------------------------------------|----------------------------------|
| Final R indexes [ $I \geq 2\sigma(I)$ ]        | $R_1 = 0.0457$ , $wR_2 = 0.1245$ |
| Final R indexes [all data]                     | $R_1 = 0.0508$ , $wR_2 = 0.1281$ |
| Largest diff. peak/hole / $e \text{ \AA}^{-3}$ | 0.28/-0.43                       |

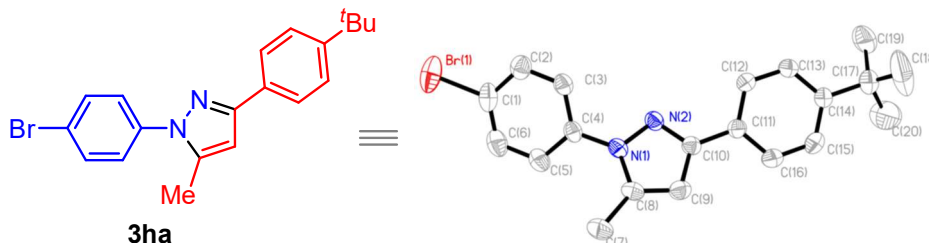

|                                                |                                                                  |
|------------------------------------------------|------------------------------------------------------------------|
| Empirical formula                              | $C_{20}H_{21}BrN_2$                                              |
| Formula weight                                 | 369.30                                                           |
| Temperature/K                                  | 296.15                                                           |
| Crystal system                                 | monoclinic                                                       |
| Space group                                    | $P2_1/n$                                                         |
| a/Å                                            | 7.6106(9)                                                        |
| b/Å                                            | 7.0096(9)                                                        |
| c/Å                                            | 35.036(5)                                                        |
| $\alpha/^\circ$                                | 90                                                               |
| $\beta/^\circ$                                 | 93.871(4)                                                        |
| $\gamma/^\circ$                                | 90                                                               |
| Volume/Å <sup>3</sup>                          | 1864.8(4)                                                        |
| Z                                              | 4                                                                |
| $\rho_{\text{calc}}/\text{cm}^3$               | 1.315                                                            |
| $\mu/\text{mm}^{-1}$                           | 2.206                                                            |
| F(000)                                         | 760.0                                                            |
| Crystal size/mm <sup>3</sup>                   | $0.32 \times 0.19 \times 0.15$                                   |
| Radiation                                      | MoK $\alpha$ ( $\lambda = 0.71073$ )                             |
| 2 $\theta$ range for data collection/ $^\circ$ | 4.662 to 59.174                                                  |
| Index ranges                                   | $-9 \leq h \leq 10$ , $-9 \leq k \leq 9$ , $-48 \leq l \leq 48$  |
| Reflections collected                          | 40261                                                            |
| Independent reflections                        | 5233 [ $R_{\text{int}} = 0.0836$ , $R_{\text{sigma}} = 0.0610$ ] |
| Data/restraints/parameters                     | 5233/48/212                                                      |
| Goodness-of-fit on $F^2$                       | 0.992                                                            |
| Final R indexes [ $I \geq 2\sigma(I)$ ]        | $R_1 = 0.0616$ , $wR_2 = 0.1484$                                 |
| Final R indexes [all data]                     | $R_1 = 0.1705$ , $wR_2 = 0.1957$                                 |
| Largest diff. peak/hole / $e \text{ \AA}^{-3}$ | 0.47/-0.40                                                       |

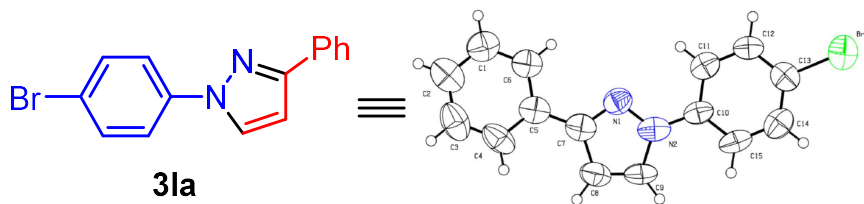

|                                               |                                                               |
|-----------------------------------------------|---------------------------------------------------------------|
| Empirical formula                             | $C_{15}H_{11}BrN_2$                                           |
| Formula weight                                | 299.17                                                        |
| Temperature/K                                 | 296.15                                                        |
| Crystal system                                | orthorhombic                                                  |
| Space group                                   | $Pna2_1$                                                      |
| $a/\text{\AA}$                                | 8.3864(19)                                                    |
| $b/\text{\AA}$                                | 26.396(6)                                                     |
| $c/\text{\AA}$                                | 5.7779(12)                                                    |
| $\alpha/^\circ$                               | 90                                                            |
| $\beta/^\circ$                                | 90                                                            |
| $\gamma/^\circ$                               | 90                                                            |
| Volume/ $\text{\AA}^3$                        | 1279.0(5)                                                     |
| $Z$                                           | 4                                                             |
| $\rho_{\text{calc}}/\text{cm}^3$              | 1.554                                                         |
| $\mu/\text{mm}^{-1}$                          | 3.196                                                         |
| $F(000)$                                      | 600.0                                                         |
| Crystal size/ $\text{mm}^3$                   | $0.32 \times 0.26 \times 0.07$                                |
| Radiation                                     | $\text{MoK}\alpha$ ( $\lambda = 0.71073$ )                    |
| $2\Theta$ range for data collection/ $^\circ$ | 5.096 to 50.042                                               |
| Index ranges                                  | $-9 \leq h \leq 9, -28 \leq k \leq 31, -6 \leq l \leq 6$      |
| Reflections collected                         | 17590                                                         |
| Independent reflections                       | 2241 [ $R_{\text{int}} = 0.1607, R_{\text{sigma}} = 0.1292$ ] |
| Data/restraints/parameters                    | 2241/1/140                                                    |
| Goodness-of-fit on $F^2$                      | 1.015                                                         |
| Final R indexes [ $I \geq 2\sigma(I)$ ]       | $R_1 = 0.0515, wR_2 = 0.1036$                                 |
| Final R indexes [all data]                    | $R_1 = 0.1559, wR_2 = 0.1333$                                 |
| Largest diff. peak/hole / $e \text{\AA}^{-3}$ | 0.34/-0.23                                                    |
| Flack parameter                               | -0.01(3)                                                      |

## Computational Results

All the calculations were performed using the Gaussian 16 program.<sup>[11]</sup> The geometry optimizations and frequencies were calculated in B3LYP<sup>[12]</sup> functional employing a mixed basis set of Stuttgart-Dresden effective core potential (SDD)<sup>[13]</sup> on silver and a 6-31G(d,p) basis set on the remaining atoms. The SMD<sup>[14]</sup> solvation model was used to account for the effects of tetrahydrofuran environment. Optimized geometries were verified by frequency computations as minima (zero imaginary frequencies) or transition structures (a single imaginary frequency). More accurate electronic energies were obtained at B3LYP-D3(BJ)<sup>[15]</sup> /6-311+G(2d,p)+SDD(Ag) level of theory. Gibbs free energies were corrected using Truhlar et al.'s quasi-harmonic treatment<sup>[16]</sup> by setting all positive frequencies that are less than 100 cm<sup>-1</sup> to 100 cm<sup>-1</sup>, and concentration was corrected from 1 atm to 1mol/L. This was implemented using GoodVibes.<sup>[17]</sup> Non-covalent interaction analysis was performed by NCIPLOT<sup>[18]</sup> and displayed via PyMOL.<sup>[19]</sup> All energetics reported throughout the text are in kcal/mol and the bond lengths are in angstroms (Å). Structures were generated using CYLview.<sup>[20]</sup>

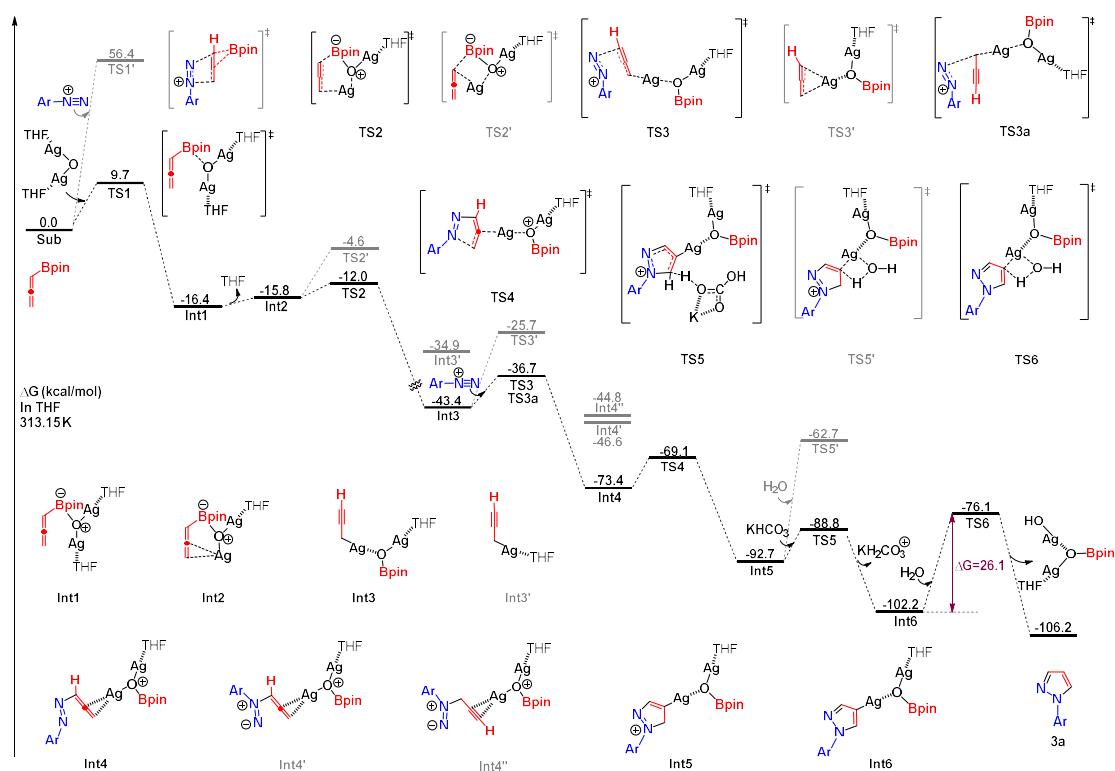

**Fig. S1** Calculated free energy profiles for annulation reaction of allenylboronate **1a** and aryl diazonium salt **2a**.



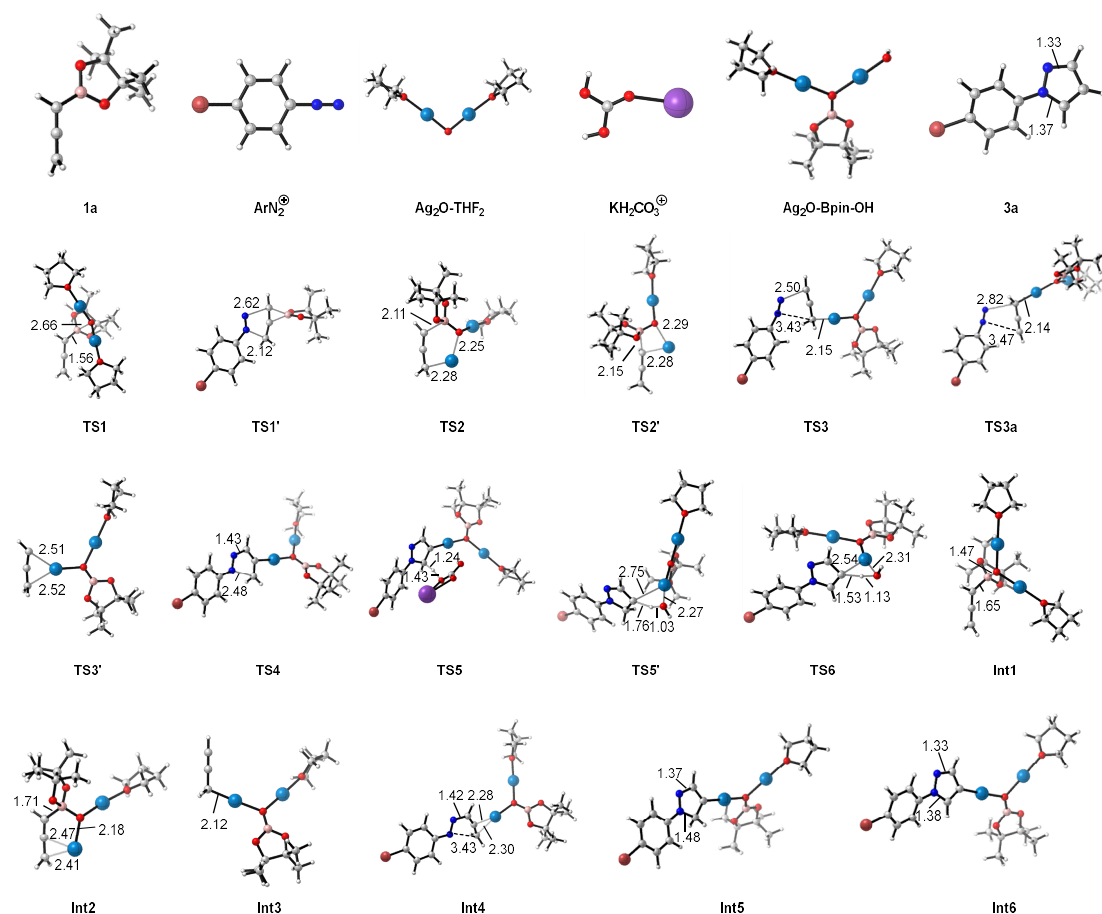

**Fig. S2** Calculated structures of substrates, transition states, intermediates and products for annulation reaction of allenylboronate **1a** and aryl diazonium salt **2a**.

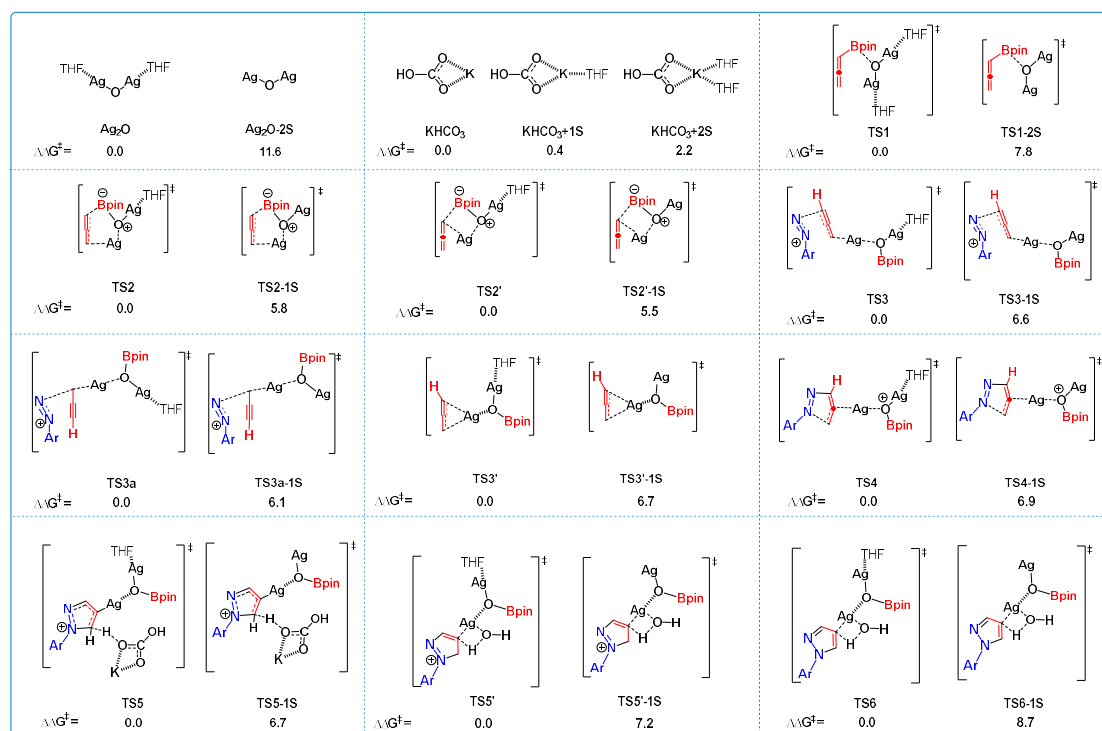

**Fig. S3** Calculated free energies of transition states and substrates under different coordination

numbers of tetrahydrofuran.

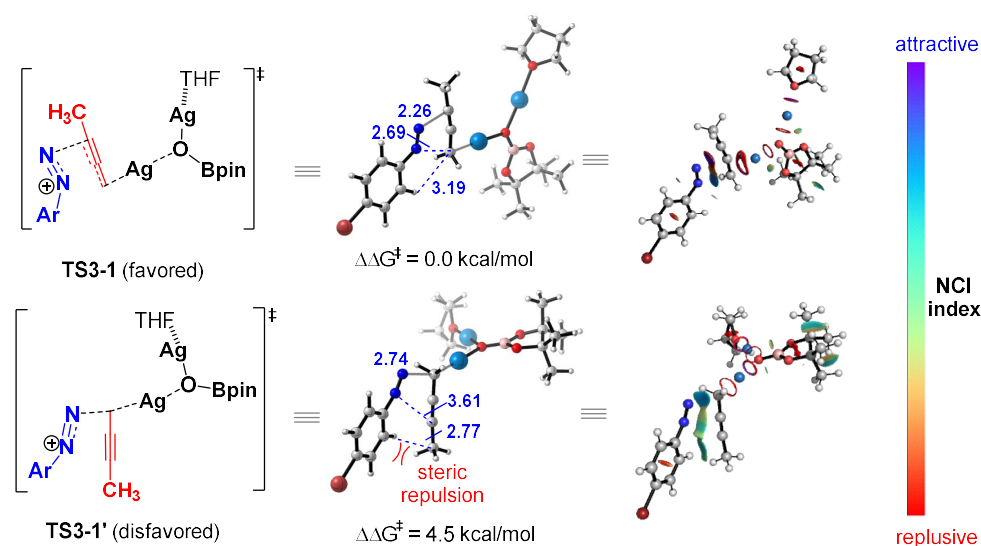

**Fig. S4** Noncovalent interaction analysis (blue, strong attraction; green, weak interaction; and red, strong repulsion) for stereo-controlling transition states in annulation reaction of allenylboronate **1b** and aryl diazonium salt **2a**, together with their relative free energies (kcal/mol) and bond lengths (Å).

## References

- [1] (a) H. Ito, Y. Sasaki, M. Sawamura, *J. Am. Chem. Soc.*, 2008, **130**, 15774–15775; (b) T. S. N. Zhao, Y. Yang, T. Lessing, K. J. Szabó, *J. Am. Chem. Soc.*, 2014, **136**, 7563–7566.
- [2] (a) D.-W. Gao, Y. Xiao, M. Liu, Z. Liu, M. K. Karunananda, J. S. Chen, K. M. Engle, *ACS Catal.*, 2018, **8**, 3650–3654; (b) Y. Huang, J. del Pozo, S. Torker, A. H. Hoveyda, *J. Am. Chem. Soc.*, 2018, **140**, 2643–2655; (c) H. L. Sang, S. Yu, S. Ge, *Org. Chem. Front.*, 2018, **5**, 1284–1287.
- [3] C. L. Peck, J. Nekvinda, W. L. Santos, *Chem. Commun.*, 2020, **56**, 10313–10316.
- [4] (a) Y. Zheng, Y. Long, H. Gong, J. Xu, C. Zhang, H. Fu, X. Zheng, H. Chen, and R. Li, *Org. Lett.*, 2022, **24**, 3878–3883; (b) J.-H. Wang, T. Lei, X.-L. Nan, H.-L. Wu, X.-B. Li, B. Chen, C.-H. Tung, and L.-Z. Wu, *Org. Lett.*, 2019, **21**, 5581–5585; (c) S. Das, P. Natarajan, and B. König, *Chem. Eur. J.*, 2017, **23**, 18161–18165; (d) M. Tobisu, T. Xu, T. Shimasaki, and N. Chatani, *J. Am. Chem. Soc.*, 2011, **133**, 19505–19511; (e) F. Diness and D. P. Fairlie, *Angew. Chem., Int. Ed.*, 2012, **51**, 8012–8016; (f) N. M. Shavaleev, G. Xie, S. Varghese, D. B. Cordes, A. M. Z. Slawin, C. Momblona, E. Ortí, He. J. Bolink, I. D. W. Samuel, and E. Zysman-Colman, *Inorg. Chem.*, 2015, **54**, 5907–5914; (g) W.-C. C. Lee, Y. Shen, D. A. Gutierrez, and J. J. Li, *Org. Lett.*, 2016, **18**, 2660–2663; (h) Q. Zhou, F. Du, Y. Chen, Y. Fu, W. Sun, Y. Wu, and G. Chen, *J. Org. Chem.*, 2019, **84**, 8160–8167; (i) T. Niwa, H. Ochiai, Y. Watanabe, and T. Hosoya, *J. Am. Chem. Soc.*, 2015, **137**, 14313–14318.

- [5] R. E. Beveridge, D. Fernando, B. S. Gerstenberger, *Tetrahedron Lett.*, 2010, **51**, 5005–5008.
- [6] W. Wang, T. Huo, X. Zhao, Q. Qin, Y. Liang, S. Song, G. Liu and N. Jiao, *CCS Chem.*, 2020, **2**, 566–575.
- [7] C. H. A. De Oliveira, L. M. Mairink, F. Pazini, L. M. Lião, A. L. de Oliveira, C. Viegas Jr., V. de Oliveira, L. C. Cunha, F. G. F. Oliveira, J. L. Paz Jr., M. N. Eberlin & R. Menegatti, *Syn. Commun.*, 2013, **43**, 1633–1639.
- [8] A. Bischoff, H. Subramanya, K. Sundaresan K, et al. Novel Piperazine Derivatives As Inhibitors Of Stearoyl-CoA Desaturase: U.S. Patent Application 12/644,162[P]. 2010-6-24.
- [9] D. L. Browne, J. B. Taylor, A. Plant, J. P. A. Harrity, *J. Org. Chem.*, 2010, **75**, 984–987.
- [10] X. Yu, S. Yu, J. Xiao, B. Wan and X. Li, *J. Org. Chem.*, 2013, **78**, 5444–5452.
- [11] M. J. Frisch, et. al. *Gaussian 16*, Revision A.03, Gaussian, Inc.: Wallingford CT, 2016.
- [12] (a) A. D. Becke, *J. Chem. Phys.*, 1993, **98**, 5648–5652; (b) C. Lee, W. Yang, R. G. Parr, *Phys. Rev. B*, 1988, **37**, 785–789.
- [13] (a) L. V. Szentpaly, P. Fuentealba, H. Preuss, H. Stoll, *Chem. Phys. Lett.*, 1982, **93**, 555–559; (b) M. Dolg, U. Wedig, H. Stoll, H. J. Preuss, *Chem. Phys.*, 1987, **86**, 866–872; (c) P. Schwerdtfeger, M. Dolg, W. H. E. Schwarz, G. A. Bowmaker, P. D. W. Boyd, *J. Chem. Phys.*, 1989, **91**, 1762–1774.
- [14] A. V. Marenich, C. J. Cramer, D. G. Truhlar, *J. Phys. Chem. B*, 2009, **113**, 6378–6396.
- [15] (a) S. Grimme, *J. Comput. Chem.*, 2006, **27**, 1787–1799; (b) S. Grimme, J. Antony, S. Ehrlich, H. Krieg, *J. Chem. Phys.*, 2010, **132**, 154104; (c) J. P. Wagner, P. R. Schreiner, *Angew. Chem., Int. Ed.*, 2015, **54**, 12274–12296.
- [16] R. F. Ribeiro, A. V. Marenich, C. J. Cramer, D. G. Truhlar, *J. Phys. Chem. B.*, 2011, **115**, 14556–14562.
- [17] I. Funes-Ardoiz, R. S. Paton, 2016, GoodVibes v2.0.2. (<http://doi.org/10.5281/zenodo.595246>).
- [18] E. R. Johnson, S. Keinan, P. Mori-Sánchez, J. Contreras-García, A. J. Cohen, W. Yang, *J. Am. Chem. Soc.*, 2010, **132**, 6498–6506.
- [19] The PyMOL Molecular Graphics System, Version 1.7.2.1, Schrödinger, LLC.
- [20] CYLview, 1.0b; C. Y. Legault, Université de Sherbrooke, 2009. (<http://www.cylview.org>).

**B3LYP/6-31G(d,p)+SDD(Ag)-SMD Calculated Cartesian Coordinates  
and Single Point Energies Calculated Using the B3LYP-D3(BJ)/6-  
311+G(2d,p)+SDD(Ag)-SMD//B3LYP/6-31G(d,p)+SDD(Ag)-SMD**

1a

|   |          |          |          |
|---|----------|----------|----------|
| C | -3.35745 | -0.27598 | -0.02983 |
| C | -2.30907 | -1.04266 | -0.22744 |
| H | -2.48265 | -2.09177 | -0.47685 |
| C | -4.39333 | 0.49343  | 0.17041  |
| H | -4.82798 | 0.61109  | 1.1612   |
| H | -4.85518 | 1.04534  | -0.64595 |
| C | 0.94821  | 0.87444  | 0.00178  |
| C | 1.43289  | -0.6281  | 0.03043  |
| B | -0.84406 | -0.53404 | -0.11918 |
| O | -0.48951 | 0.7432   | 0.23582  |
| O | 0.22817  | -1.35163 | -0.37588 |
| C | 1.7891   | -1.12813 | 1.43485  |
| H | 1.92149  | -2.21367 | 1.40378  |
| H | 2.72024  | -0.68158 | 1.79578  |
| H | 0.99597  | -0.90512 | 2.15459  |
| C | 2.55264  | -0.9673  | -0.94854 |
| H | 3.45862  | -0.39973 | -0.71274 |
| H | 2.79523  | -2.03193 | -0.87508 |
| H | 2.26876  | -0.75628 | -1.98144 |
| C | 1.53453  | 1.76506  | 1.09283  |
| H | 2.62164  | 1.84127  | 0.98838  |
| H | 1.11779  | 2.77341  | 1.00785  |
| H | 1.30642  | 1.38844  | 2.09194  |
| C | 1.10964  | 1.54198  | -1.36853 |
| H | 0.57711  | 2.4976   | -1.36392 |
| H | 2.16099  | 1.73861  | -1.59825 |
| H | 0.68955  | 0.92549  | -2.16881 |

Zero-point correction= 0.228111 (Hartree/Particle)

Thermal correction to Energy= 0.242483

Thermal correction to Enthalpy= 0.243474

Thermal correction to Gibbs Free Energy= 0.186762

SCF Done: E(RB3LYP) = -527.573685601

Thermal correction to Gibbs free energy (ZPG) from GoodVibes: 0.191189

**3a**

|    |          |          |          |
|----|----------|----------|----------|
| C  | 0.89958  | -1.19035 | 0.16455  |
| C  | -0.49282 | -1.17443 | 0.16606  |
| C  | -1.17882 | 0.03282  | -0.00875 |
| C  | -0.4675  | 1.22406  | -0.19123 |
| C  | 0.92602  | 1.21132  | -0.17999 |
| C  | 1.59751  | 0.00416  | -0.0027  |
| H  | 1.42958  | -2.126   | 0.30189  |
| H  | -1.05096 | -2.09219 | 0.30435  |
| H  | -0.98797 | 2.16037  | -0.35939 |
| H  | 1.47555  | 2.13475  | -0.3223  |
| N  | -3.2859  | -1.09942 | -0.29569 |
| N  | -2.59686 | 0.03799  | -0.00067 |
| C  | -4.56689 | -0.75759 | -0.1883  |
| Br | 3.51413  | -0.01433 | 0.00658  |
| C  | -3.43559 | 1.07732  | 0.29211  |
| C  | -4.72275 | 0.59875  | 0.17824  |
| H  | -3.05932 | 2.04781  | 0.5773   |
| H  | -5.63928 | 1.14552  | 0.34384  |
| H  | -5.33516 | -1.49522 | -0.38135 |

Zero-point correction= 0.142064 (Hartree/Particle)

Thermal correction to Energy= 0.152449

Thermal correction to Enthalpy= 0.153441

Thermal correction to Gibbs Free Energy= 0.102770

SCF Done: E(RB3LYP) = -3030.97833764

Thermal correction to Gibbs free energy (ZPG) from GoodVibes: 0.107009

**ArN<sub>2</sub><sup>+</sup>**

|    |          |          |    |
|----|----------|----------|----|
| C  | -0.07416 | -1.22784 | 0. |
| C  | -1.4573  | -1.24259 | 0. |
| C  | -2.12053 | 0.       | 0. |
| C  | -1.4573  | 1.24259  | 0. |
| C  | -0.07416 | 1.22784  | 0. |
| C  | 0.60257  | 0.       | 0. |
| H  | 0.47384  | -2.16188 | 0. |
| H  | -2.01514 | -2.17126 | 0. |
| H  | -2.01514 | 2.17126  | 0. |
| H  | 0.47384  | 2.16188  | 0. |
| N  | -4.60395 | 0.       | 0. |
| N  | -3.49033 | 0.       | 0. |
| Br | 2.49222  | 0.       | 0. |

Zero-point correction= 0.088921 (Hartree/Particle)

Thermal correction to Energy= 0.097293

Thermal correction to Enthalpy= 0.098285

Thermal correction to Gibbs Free Energy= 0.052615  
 SCF Done: E(RB3LYP) = -2914.58276067  
 Thermal correction to Gibbs free energy (ZPG) from GoodVibes: 0.056525

**THF**

|   |          |          |          |
|---|----------|----------|----------|
| C | -1.16723 | -0.4274  | 0.13247  |
| O | 0.00006  | -1.25523 | -0.00015 |
| C | 1.16733  | -0.42727 | -0.13228 |
| C | 0.73261  | 0.99525  | 0.22899  |
| C | -0.73277 | 0.99511  | -0.22907 |
| H | -1.95447 | -0.81827 | -0.52309 |
| H | -1.53499 | -0.47649 | 1.16898  |
| H | 1.95435  | -0.81798 | 0.52364  |
| H | 1.53551  | -0.47644 | -1.16863 |
| H | 0.79268  | 1.14991  | 1.31244  |
| H | 1.34448  | 1.75876  | -0.25945 |
| H | -1.34475 | 1.75862  | 0.25924  |
| H | -0.79289 | 1.14954  | -1.31255 |

Zero-point correction= 0.116709 (Hartree/Particle)  
 Thermal correction to Energy= 0.122061  
 Thermal correction to Enthalpy= 0.123052  
 Thermal correction to Gibbs Free Energy= 0.086607  
 SCF Done: E(RB3LYP) = -232.546605287  
 Thermal correction to Gibbs free energy (ZPG) from GoodVibes: 0.090419

**Ag<sub>2</sub>O-2S**

|    |    |         |         |
|----|----|---------|---------|
| O  | 0. | 0.      | 1.22902 |
| Ag | 0. | -1.5379 | -0.1046 |
| Ag | 0. | 1.5379  | -0.1046 |

Zero-point correction= 0.002213 (Hartree/Particle)  
 Thermal correction to Energy= 0.006641  
 Thermal correction to Enthalpy= 0.007633  
 Thermal correction to Gibbs Free Energy= -0.029766  
 SCF Done: E(RB3LYP) = -369.242405988  
 Thermal correction to Gibbs free energy (ZPG) from GoodVibes: -0.025931

**Ag<sub>2</sub>O**

|    |          |          |          |
|----|----------|----------|----------|
| O  | -0.00747 | -2.08684 | -0.10523 |
| Ag | -1.5449  | -0.80023 | -0.03063 |
| Ag | 1.58093  | -0.862   | -0.05279 |
| O  | -3.2718  | 0.53368  | 0.04963  |
| C  | -4.12841 | 0.68292  | 1.21918  |
| C  | -3.87969 | 1.16736  | -1.11729 |
| C  | -5.0957  | 1.79975  | 0.84596  |

|                                                               |                |          |                             |
|---------------------------------------------------------------|----------------|----------|-----------------------------|
| H                                                             | -4.64574       | -0.26732 | 1.39735                     |
| H                                                             | -3.48598       | 0.9098   | 2.07328                     |
| C                                                             | -5.2791        | 1.57965  | -0.66432                    |
| H                                                             | -3.25944       | 2.02818  | -1.39019                    |
| H                                                             | -3.87658       | 0.44639  | -1.93853                    |
| H                                                             | -4.64279       | 2.77789  | 1.04109                     |
| H                                                             | -6.03215       | 1.73353  | 1.40553                     |
| H                                                             | -5.62917       | 2.47193  | -1.18931                    |
| H                                                             | -5.99362       | 0.76989  | -0.84638                    |
| O                                                             | 3.36629        | 0.39133  | -0.00426                    |
| C                                                             | 3.86232        | 1.16516  | -1.13858                    |
| C                                                             | 4.09161        | 0.73777  | 1.21163                     |
| C                                                             | 4.81486        | 2.19326  | -0.53232                    |
| H                                                             | 4.373          | 0.47382  | -1.818                      |
| H                                                             | 3.00415        | 1.60615  | -1.65176                    |
| C                                                             | 5.33393        | 1.47319  | 0.7227                      |
| H                                                             | 3.45042        | 1.37729  | 1.82959                     |
| H                                                             | 4.30129        | -0.19025 | 1.7488                      |
| H                                                             | 4.26962        | 3.10102  | -0.25246                    |
| H                                                             | 5.6105         | 2.47008  | -1.22844                    |
| H                                                             | 5.72702        | 2.15801  | 1.47833                     |
| H                                                             | 6.12111        | 0.75877  | 0.45866                     |
| Zero-point correction=                                        |                |          | 0.239597 (Hartree/Particle) |
| Thermal correction to Energy=                                 |                |          | 0.258281                    |
| Thermal correction to Enthalpy=                               |                |          | 0.259273                    |
| Thermal correction to Gibbs Free Energy=                      |                |          | 0.182488                    |
| SCF Done: E(RB3LYP) =                                         | -834.393150633 |          |                             |
| Thermal correction to Gibbs free energy (ZPG) from GoodVibes: |                |          | 0.193972                    |

## H<sub>2</sub>O

|                                                               |                |          |                             |
|---------------------------------------------------------------|----------------|----------|-----------------------------|
| O                                                             | -0.32762       | -0.52738 | -0.33746                    |
| H                                                             | 0.63808        | -0.47384 | -0.33746                    |
| H                                                             | -0.59951       | 0.40081  | -0.33746                    |
| Zero-point correction=                                        |                |          | 0.021180 (Hartree/Particle) |
| Thermal correction to Energy=                                 |                |          | 0.024159                    |
| Thermal correction to Enthalpy=                               |                |          | 0.025150                    |
| Thermal correction to Gibbs Free Energy=                      |                |          | 0.001744                    |
| SCF Done: E(RB3LYP) =                                         | -76.4669292954 |          |                             |
| Thermal correction to Gibbs free energy (ZPG) from GoodVibes: |                |          | 0.004963                    |

## KHCO<sub>3</sub>

|   |          |          |          |
|---|----------|----------|----------|
| C | -1.01678 | 0.03897  | 0.00087  |
| O | -2.39989 | 0.08202  | -0.0021  |
| H | -2.67515 | -0.84773 | -0.00125 |

|                                                               |                |          |                             |
|---------------------------------------------------------------|----------------|----------|-----------------------------|
| O                                                             | -0.44166       | 1.15393  | 0.00163                     |
| O                                                             | -0.48979       | -1.11035 | 0.00171                     |
| K                                                             | 1.86456        | -0.02058 | -0.00073                    |
| Zero-point correction=                                        |                |          | 0.027785 (Hartree/Particle) |
| Thermal correction to Energy=                                 |                |          | 0.033569                    |
| Thermal correction to Enthalpy=                               |                |          | 0.034560                    |
| Thermal correction to Gibbs Free Energy=                      |                |          | -0.004141                   |
| SCF Done: E(RB3LYP) =                                         | -864.539782720 |          |                             |
| Thermal correction to Gibbs free energy (ZPG) from GoodVibes: |                |          | -0.000437                   |

### **KH<sub>2</sub>CO<sub>3</sub><sup>+</sup>**

|                                                               |                |          |                             |
|---------------------------------------------------------------|----------------|----------|-----------------------------|
| H                                                             | -2.14962       | 1.69945  | -0.0171                     |
| C                                                             | -1.28246       | 0.02607  | 0.0089                      |
| O                                                             | -1.52186       | -1.27804 | 0.00229                     |
| O                                                             | -0.15205       | 0.4814   | 0.04186                     |
| O                                                             | -2.39634       | 0.75694  | -0.02403                    |
| K                                                             | 2.36247        | -0.00462 | -0.00912                    |
| H                                                             | -2.48061       | -1.45041 | -0.02389                    |
| Zero-point correction=                                        |                |          | 0.040009 (Hartree/Particle) |
| Thermal correction to Energy=                                 |                |          | 0.046361                    |
| Thermal correction to Enthalpy=                               |                |          | 0.047352                    |
| Thermal correction to Gibbs Free Energy=                      |                |          | 0.006791                    |
| SCF Done: E(RB3LYP) =                                         | -864.975251599 |          |                             |
| Thermal correction to Gibbs free energy (ZPG) from GoodVibes: |                |          | 0.010754                    |

### **KHCO<sub>3</sub>-1S**

|   |          |          |          |
|---|----------|----------|----------|
| C | 3.53188  | 0.07517  | 0.09652  |
| O | 4.86712  | 0.31561  | 0.386    |
| H | 4.95758  | 1.2795   | 0.33565  |
| O | 3.18956  | -1.13086 | 0.10686  |
| O | 2.82061  | 1.09185  | -0.14233 |
| K | 0.73286  | -0.45661 | -0.50639 |
| O | -1.88747 | -0.83676 | -0.90153 |
| C | -2.52229 | -2.12154 | -1.11491 |
| C | -2.88373 | 0.21452  | -0.94131 |
| C | -4.02433 | -1.87238 | -0.98711 |
| H | -2.26119 | -2.48551 | -2.118   |
| H | -2.13367 | -2.82952 | -0.37535 |
| C | -4.15051 | -0.43095 | -1.50081 |
| H | -3.04353 | 0.59237  | 0.07771  |
| H | -2.50242 | 1.03336  | -1.56055 |
| H | -4.33405 | -1.93272 | 0.0621   |
| H | -4.61356 | -2.59176 | -1.56163 |
| H | -5.05782 | 0.07434  | -1.15983 |



|                                                               |                |          |          |                             |
|---------------------------------------------------------------|----------------|----------|----------|-----------------------------|
| H                                                             | -4.13685       | -0.41314 | -2.59625 |                             |
| Zero-point correction=                                        |                |          |          | 0.145296 (Hartree/Particle) |
| Thermal correction to Energy=                                 |                |          |          | 0.158833                    |
| Thermal correction to Enthalpy=                               |                |          |          | 0.159824                    |
| Thermal correction to Gibbs Free Energy=                      |                |          |          | 0.095615                    |
| SCF Done: E(RB3LYP) =                                         | -1097.10287585 |          |          |                             |
| Thermal correction to Gibbs free energy (ZPG) from GoodVibes: |                |          |          | 0.10715                     |

**KHCO<sub>3</sub>-2S**

|                                 |          |          |          |                             |
|---------------------------------|----------|----------|----------|-----------------------------|
| C                               | 2.05705  | -2.0312  | 0.07763  |                             |
| O                               | 3.34765  | -2.44496 | 0.39647  |                             |
| H                               | 3.77827  | -2.57769 | -0.46196 |                             |
| O                               | 1.31233  | -1.80197 | 1.05906  |                             |
| O                               | 1.79667  | -1.92649 | -1.15349 |                             |
| K                               | -0.32976 | -0.45435 | -0.52912 |                             |
| O                               | -2.96276 | -0.0431  | -0.15917 |                             |
| C                               | -3.78176 | 0.95541  | -0.81432 |                             |
| C                               | -3.75197 | -0.75618 | 0.82373  |                             |
| C                               | -5.07751 | 1.0338   | -0.00679 |                             |
| H                               | -3.22874 | 1.90047  | -0.83984 |                             |
| H                               | -3.97263 | 0.6353   | -1.84764 |                             |
| C                               | -5.20739 | -0.40045 | 0.52603  |                             |
| H                               | -3.5358  | -1.82568 | 0.73298  |                             |
| H                               | -3.4576  | -0.4246  | 1.82901  |                             |
| H                               | -5.92733 | 1.34962  | -0.61751 |                             |
| H                               | -4.96876 | 1.74056  | 0.82335  |                             |
| H                               | -5.61165 | -1.06153 | -0.24866 |                             |
| H                               | -5.84311 | -0.47905 | 1.41178  |                             |
| O                               | 1.44281  | 1.59792  | -0.26667 |                             |
| C                               | 2.59852  | 1.46383  | -1.1338  |                             |
| C                               | 1.88231  | 1.72112  | 1.10802  |                             |
| C                               | 3.81992  | 1.37424  | -0.21352 |                             |
| H                               | 2.47488  | 0.56741  | -1.74999 |                             |
| H                               | 2.64315  | 2.34549  | -1.78649 |                             |
| C                               | 3.34891  | 2.13695  | 1.03333  |                             |
| H                               | 1.2404   | 2.45581  | 1.6049   |                             |
| H                               | 1.77368  | 0.74911  | 1.60842  |                             |
| H                               | 4.71564  | 1.80153  | -0.67268 |                             |
| H                               | 4.02654  | 0.32874  | 0.03885  |                             |
| H                               | 3.43306  | 3.21892  | 0.87951  |                             |
| H                               | 3.90323  | 1.87193  | 1.93781  |                             |
| Zero-point correction=          |          |          |          | 0.263529 (Hartree/Particle) |
| Thermal correction to Energy=   |          |          |          | 0.284258                    |
| Thermal correction to Enthalpy= |          |          |          | 0.285249                    |

Thermal correction to Gibbs Free Energy= 0.203011  
 SCF Done: E(RB3LYP) = -1329.66610751  
 Thermal correction to Gibbs free energy (ZPG) from GoodVibes: 0.216988

**Ag<sub>2</sub>O-Bpin-OH**

|    |          |          |          |
|----|----------|----------|----------|
| Ag | -1.06304 | 2.59024  | -0.00516 |
| C  | -3.48437 | -1.51541 | -0.17685 |
| C  | -2.35845 | -2.55    | 0.22487  |
| B  | -1.46483 | -0.44942 | -0.00049 |
| O  | -2.83244 | -0.23835 | 0.07406  |
| O  | -1.14198 | -1.80117 | -0.05707 |
| C  | -2.34262 | -3.83786 | -0.59356 |
| H  | -1.52196 | -4.47961 | -0.25663 |
| H  | -3.2769  | -4.39371 | -0.46279 |
| H  | -2.20187 | -3.64018 | -1.65838 |
| C  | -2.34842 | -2.87685 | 1.72322  |
| H  | -3.2066  | -3.49247 | 2.00897  |
| H  | -1.43689 | -3.43429 | 1.96102  |
| H  | -2.35834 | -1.96726 | 2.33176  |
| C  | -3.83412 | -1.55545 | -1.66956 |
| H  | -4.38739 | -2.46229 | -1.93182 |
| H  | -4.4619  | -0.69232 | -1.91126 |
| H  | -2.93629 | -1.50567 | -2.29343 |
| C  | -4.75708 | -1.58822 | 0.6621   |
| H  | -5.46466 | -0.82416 | 0.32459  |
| H  | -5.24062 | -2.56453 | 0.55221  |
| H  | -4.55538 | -1.41671 | 1.7216   |
| O  | -0.54071 | 0.53062  | -0.0171  |
| Ag | 1.4958   | -0.02872 | -0.016   |
| O  | 3.59252  | -0.56669 | -0.01514 |
| C  | 4.45805  | -0.53948 | 1.16481  |
| C  | 4.3566   | -0.92403 | -1.21014 |
| C  | 5.87516  | -0.62598 | 0.60835  |
| H  | 4.2497   | 0.38214  | 1.71331  |
| H  | 4.20205  | -1.40242 | 1.78922  |
| C  | 5.68287  | -1.45071 | -0.67476 |
| H  | 3.77441  | -1.66035 | -1.76912 |
| H  | 4.48308  | -0.02052 | -1.81651 |
| H  | 6.56132  | -1.09346 | 1.31868  |
| H  | 6.25276  | 0.37351  | 0.36811  |
| H  | 5.60287  | -2.51694 | -0.4378  |
| H  | 6.4931   | -1.31565 | -1.39538 |
| O  | -1.49629 | 4.57205  | -0.03367 |
| H  | -1.72076 | 4.79441  | 0.88105  |

Zero-point correction= 0.316675 (Hartree/Particle)  
 Thermal correction to Energy= 0.342539  
 Thermal correction to Enthalpy= 0.343530  
 Thermal correction to Gibbs Free Energy= 0.252011  
 SCF Done: E(RB3LYP) = -1089.25231747  
 Thermal correction to Gibbs free energy (ZPG) from GoodVibes: 0.264954

**Bpin-AgO**

|    |          |          |          |
|----|----------|----------|----------|
| C  | 2.97239  | 1.08143  | -0.23906 |
| C  | 3.87796  | -0.15514 | 0.14024  |
| B  | 1.67719  | -0.81811 | -0.0139  |
| O  | 1.64707  | 0.58908  | 0.06296  |
| O  | 2.99949  | -1.27174 | -0.11914 |
| C  | 5.14179  | -0.31497 | -0.70336 |
| H  | 5.80633  | 0.54795  | -0.58657 |
| H  | 5.69076  | -1.20578 | -0.38029 |
| H  | 4.90776  | -0.43293 | -1.76375 |
| C  | 4.24008  | -0.19473 | 1.63241  |
| H  | 4.68388  | -1.16808 | 1.86421  |
| H  | 4.96328  | 0.58184  | 1.90118  |
| H  | 3.35183  | -0.07205 | 2.26004  |
| C  | 3.00834  | 1.40938  | -1.7389  |
| H  | 2.21613  | 2.13055  | -1.96495 |
| H  | 3.9639   | 1.85007  | -2.04058 |
| H  | 2.83404  | 0.51475  | -2.3448  |
| C  | 3.23001  | 2.34784  | 0.57551  |
| H  | 4.25361  | 2.70948  | 0.42931  |
| H  | 2.54698  | 3.141    | 0.25273  |
| H  | 3.06998  | 2.18124  | 1.64315  |
| O  | 0.61961  | -1.62122 | 0.01058  |
| Ag | -1.26052 | -0.79365 | 0.06356  |
| O  | -3.28581 | -0.03139 | 0.10959  |
| C  | -4.21313 | -0.14575 | -1.01232 |
| C  | -3.74362 | 0.99218  | 1.0519   |
| C  | -5.49791 | 0.49498  | -0.50528 |
| H  | -3.79494 | 0.39326  | -1.87027 |
| H  | -4.30177 | -1.20671 | -1.25681 |
| C  | -4.96594 | 1.62605  | 0.38996  |
| H  | -3.98987 | 0.48535  | 1.99061  |
| H  | -2.9232  | 1.69336  | 1.22264  |
| H  | -6.07639 | -0.22511 | 0.08325  |
| H  | -6.12397 | 0.85721  | -1.32448 |
| H  | -5.69498 | 1.9664   | 1.12928  |
| H  | -4.66749 | 2.48498  | -0.22019 |

Zero-point correction= 0.303449 (Hartree/Particle)  
 Thermal correction to Energy= 0.324167  
 Thermal correction to Enthalpy= 0.325158  
 Thermal correction to Gibbs Free Energy= 0.248440  
 SCF Done: E(RB3LYP) = -866.346774231  
 Thermal correction to Gibbs free energy (ZPG) from GoodVibes: 0.258187

**Int1**

|    |          |          |          |
|----|----------|----------|----------|
| C  | -0.88554 | -2.84472 | 3.14972  |
| C  | -0.0042  | -1.91746 | 2.88367  |
| C  | -1.77077 | -3.79131 | 3.38731  |
| H  | -2.81488 | -3.56397 | 3.60112  |
| C  | 0.67487  | -2.34965 | -0.68627 |
| C  | 2.0328   | -2.33685 | 0.12526  |
| B  | 0.34892  | -1.24935 | 1.41131  |
| O  | -0.2928  | -2.00743 | 0.30285  |
| O  | 1.80919  | -1.31712 | 1.09969  |
| C  | 3.26982  | -1.97655 | -0.70425 |
| H  | 4.15969  | -1.9851  | -0.06446 |
| H  | 3.43561  | -2.6987  | -1.51216 |
| H  | 3.18425  | -0.97964 | -1.1443  |
| C  | 2.29827  | -3.66866 | 0.8542   |
| H  | 2.55392  | -4.47822 | 0.16163  |
| H  | 3.14203  | -3.53244 | 1.53952  |
| H  | 1.43309  | -3.9757  | 1.44617  |
| C  | 0.65072  | -1.29404 | -1.81087 |
| H  | 1.30766  | -1.55829 | -2.64771 |
| H  | -0.37128 | -1.21618 | -2.19892 |
| H  | 0.9436   | -0.30792 | -1.4371  |
| C  | 0.30801  | -3.71143 | -1.28883 |
| H  | -0.63988 | -3.63133 | -1.83376 |
| H  | 1.06915  | -4.05985 | -1.99694 |
| H  | 0.18147  | -4.46992 | -0.51302 |
| O  | -0.07003 | 0.16237  | 1.48251  |
| Ag | 1.51745  | 1.38335  | 0.85046  |
| Ag | -1.96016 | 0.31703  | 0.60758  |
| H  | 0.53254  | -1.49819 | 3.74335  |
| H  | -1.49654 | -4.8463  | 3.38835  |
| O  | -3.97749 | 0.5713   | -0.18998 |
| C  | -4.36634 | 0.07515  | -1.50559 |
| C  | -5.15743 | 0.73004  | 0.66338  |
| C  | -5.85054 | 0.39924  | -1.60878 |
| H  | -3.73956 | 0.58122  | -2.24377 |
| H  | -4.17776 | -1.00404 | -1.54598 |

|                                                               |                |          |                             |
|---------------------------------------------------------------|----------------|----------|-----------------------------|
| C                                                             | -6.32689       | 0.19379  | -0.16162                    |
| H                                                             | -4.98715       | 0.17947  | 1.59167                     |
| H                                                             | -5.25594       | 1.79737  | 0.88739                     |
| H                                                             | -6.36189       | -0.25066 | -2.32329                    |
| H                                                             | -5.99329       | 1.43973  | -1.92003                    |
| H                                                             | -6.47877       | -0.8718  | 0.03962                     |
| H                                                             | -7.25662       | 0.72211  | 0.06334                     |
| O                                                             | 3.07688        | 2.81986  | 0.29687                     |
| C                                                             | 4.17783        | 3.19524  | 1.17814                     |
| C                                                             | 3.29715        | 3.33883  | -1.0505                     |
| C                                                             | 4.9024         | 4.31045  | 0.43406                     |
| H                                                             | 3.74686        | 3.49911  | 2.13515                     |
| H                                                             | 4.81645        | 2.31724  | 1.32947                     |
| C                                                             | 4.71866        | 3.89617  | -1.03481                    |
| H                                                             | 3.15221        | 2.52015  | -1.75985                    |
| H                                                             | 2.54745        | 4.11594  | -1.23633                    |
| H                                                             | 5.95174        | 4.38402  | 0.73026                     |
| H                                                             | 4.41865        | 5.27432  | 0.62584                     |
| H                                                             | 5.43809        | 3.11523  | -1.30304                    |
| H                                                             | 4.83606        | 4.72795  | -1.7338                     |
| Zero-point correction=                                        |                |          | 0.466955 (Hartree/Particle) |
| Thermal correction to Energy=                                 |                |          | 0.501730                    |
| Thermal correction to Enthalpy=                               |                |          | 0.502722                    |
| Thermal correction to Gibbs Free Energy=                      |                |          | 0.388050                    |
| SCF Done: E(RB3LYP) =                                         | -1362.01552170 |          |                             |
| Thermal correction to Gibbs free energy (ZPG) from GoodVibes: |                |          | 0.407758                    |

## Int2

|   |          |          |          |
|---|----------|----------|----------|
| C | -2.42345 | 2.36783  | 1.77692  |
| C | -2.32173 | 1.07458  | 1.75254  |
| H | -2.78131 | 0.51658  | 2.57146  |
| C | -2.46739 | 3.71476  | 1.70336  |
| H | -1.7663  | 4.32617  | 2.27117  |
| H | -3.3524  | 4.22195  | 1.32009  |
| C | -2.55254 | -1.81613 | -0.43189 |
| C | -1.69339 | -2.20713 | 0.83535  |
| B | -1.61907 | 0.15561  | 0.48896  |
| O | -2.76283 | -0.42019 | -0.25168 |
| O | -0.91225 | -1.03023 | 1.05923  |
| C | -0.75458 | -3.40095 | 0.63452  |
| H | -0.19883 | -3.59709 | 1.55895  |
| H | -1.31105 | -4.31141 | 0.38328  |
| H | -0.02795 | -3.21088 | -0.15958 |
| C | -2.56798 | -2.46871 | 2.07672  |

|                                                               |                |          |                             |
|---------------------------------------------------------------|----------------|----------|-----------------------------|
| H                                                             | -3.10288       | -3.42285 | 2.0124                      |
| H                                                             | -1.92588       | -2.5014  | 2.96374                     |
| H                                                             | -3.30549       | -1.675   | 2.22039                     |
| C                                                             | -1.79095       | -2.05118 | -1.75294                    |
| H                                                             | -1.68771       | -3.11599 | -1.99275                    |
| H                                                             | -2.34622       | -1.57343 | -2.56754                    |
| H                                                             | -0.79507       | -1.60055 | -1.71905                    |
| C                                                             | -3.91481       | -2.51416 | -0.52038                    |
| H                                                             | -4.43986       | -2.18552 | -1.42453                    |
| H                                                             | -3.80926       | -3.60402 | -0.57527                    |
| H                                                             | -4.54721       | -2.2694  | 0.33639                     |
| O                                                             | -0.6996        | 0.95769  | -0.29858                    |
| Ag                                                            | 1.21705        | 0.12932  | -0.17095                    |
| Ag                                                            | -1.19302       | 3.08352  | -0.24286                    |
| O                                                             | 3.28978        | -0.5749  | -0.15912                    |
| C                                                             | 4.01763        | -0.92029 | 1.06148                     |
| C                                                             | 3.97775        | -1.10318 | -1.33147                    |
| C                                                             | 5.13905        | -1.85317 | 0.60819                     |
| H                                                             | 4.39797        | 0.01155  | 1.4937                      |
| H                                                             | 3.31532        | -1.38211 | 1.75979                     |
| C                                                             | 5.38799        | -1.40703 | -0.84175                    |
| H                                                             | 3.45572        | -2.00707 | -1.66729                    |
| H                                                             | 3.92544        | -0.34297 | -2.11463                    |
| H                                                             | 4.80247        | -2.89498 | 0.63276                     |
| H                                                             | 6.02363        | -1.76236 | 1.24328                     |
| H                                                             | 5.87452        | -2.17497 | -1.44829                    |
| H                                                             | 6.00402        | -0.50171 | -0.86694                    |
| Zero-point correction=                                        |                |          | 0.348727 (Hartree/Particle) |
| Thermal correction to Energy=                                 |                |          | 0.375790                    |
| Thermal correction to Enthalpy=                               |                |          | 0.376782                    |
| Thermal correction to Gibbs Free Energy=                      |                |          | 0.284754                    |
| SCF Done: E(RB3LYP) =                                         | -1129.44774087 |          |                             |
| Thermal correction to Gibbs free energy (ZPG) from GoodVibes: |                |          | 0.297069                    |

### Int3

|   |          |          |          |
|---|----------|----------|----------|
| C | -0.89483 | 4.58187  | 2.00533  |
| C | -0.01881 | 5.22256  | 2.5577   |
| H | 0.74709  | 5.78454  | 3.04363  |
| C | -1.93172 | 3.8195   | 1.34995  |
| H | -2.21455 | 4.28406  | 0.39797  |
| H | -2.83047 | 3.766    | 1.97569  |
| C | -3.3154  | -2.29487 | -0.49315 |
| C | -2.14208 | -3.32302 | -0.23879 |
| B | -1.42782 | -1.1832  | 0.18269  |

|                                                               |                |          |                             |
|---------------------------------------------------------------|----------------|----------|-----------------------------|
| O                                                             | -2.81254       | -1.09035 | 0.14859                     |
| O                                                             | -0.9793        | -2.44985 | -0.18059                    |
| C                                                             | -1.93063       | -4.34979 | -1.34785                    |
| H                                                             | -1.08961       | -5.00248 | -1.0917                     |
| H                                                             | -2.81777       | -4.98003 | -1.4696                     |
| H                                                             | -1.70879       | -3.87315 | -2.30512                    |
| C                                                             | -2.24411       | -4.0275  | 1.1199                      |
| H                                                             | -3.06437       | -4.75135 | 1.14089                     |
| H                                                             | -1.31124       | -4.56642 | 1.31338                     |
| H                                                             | -2.39582       | -3.31    | 1.93225                     |
| C                                                             | -3.51449       | -1.96469 | -1.97781                    |
| H                                                             | -3.95098       | -2.80552 | -2.52535                    |
| H                                                             | -4.19549       | -1.1124  | -2.06474                    |
| H                                                             | -2.56945       | -1.69264 | -2.45811                    |
| C                                                             | -4.65102       | -2.66815 | 0.14415                     |
| H                                                             | -5.39117       | -1.89018 | -0.06897                    |
| H                                                             | -5.02881       | -3.61097 | -0.2652                     |
| H                                                             | -4.56933       | -2.76734 | 1.22864                     |
| O                                                             | -0.61104       | -0.17053 | 0.52635                     |
| Ag                                                            | 1.47179        | -0.49304 | 0.55206                     |
| Ag                                                            | -1.31891       | 1.83031  | 0.94036                     |
| O                                                             | 3.618          | -0.77083 | 0.58696                     |
| C                                                             | 4.40462        | -0.94615 | 1.8072                      |
| C                                                             | 4.49352        | -0.62736 | -0.57757                    |
| C                                                             | 5.8067         | -1.27973 | 1.31294                     |
| H                                                             | 4.37676        | -0.00766 | 2.37198                     |
| H                                                             | 3.93361        | -1.73868 | 2.39327                     |
| C                                                             | 5.89596        | -0.47811 | 0.00404                     |
| H                                                             | 4.38798        | -1.53121 | -1.18718                    |
| H                                                             | 4.15523        | 0.23961  | -1.14984                    |
| H                                                             | 5.89628        | -2.35296 | 1.11386                     |
| H                                                             | 6.57147        | -0.99669 | 2.04027                     |
| H                                                             | 6.65954        | -0.85791 | -0.67911                    |
| H                                                             | 6.11204        | 0.57456  | 0.21464                     |
| Zero-point correction=                                        |                |          | 0.349027 (Hartree/Particle) |
| Thermal correction to Energy=                                 |                |          | 0.377284                    |
| Thermal correction to Enthalpy=                               |                |          | 0.378276                    |
| Thermal correction to Gibbs Free Energy=                      |                |          | 0.280676                    |
| SCF Done: E(RB3LYP) =                                         | -1129.49038962 |          |                             |
| Thermal correction to Gibbs free energy (ZPG) from GoodVibes: |                |          | 0.295708                    |

### Int3'

|   |         |          |          |
|---|---------|----------|----------|
| C | 3.50623 | -0.58225 | 0.06027  |
| C | 2.81525 | 0.67942  | -0.06493 |

|                                                               |                |          |                             |
|---------------------------------------------------------------|----------------|----------|-----------------------------|
| H                                                             | 3.07591        | 1.18009  | -1.00412                    |
| C                                                             | 4.08783        | -1.64624 | 0.16586                     |
| H                                                             | 4.59835        | -2.57873 | 0.25828                     |
| Ag                                                            | 0.7101         | 0.42101  | -0.0432                     |
| H                                                             | 3.07274        | 1.35327  | 0.75984                     |
| O                                                             | -1.49834       | 0.16349  | -0.02208                    |
| C                                                             | -2.18403       | -0.51217 | -1.10848                    |
| C                                                             | -2.19377       | -0.22432 | 1.19148                     |
| C                                                             | -3.67102       | -0.42117 | -0.74141                    |
| H                                                             | -1.91288       | 0.00218  | -2.0321                     |
| H                                                             | -1.838         | -1.55251 | -1.15671                    |
| C                                                             | -3.67738       | -0.22513 | 0.8013                      |
| H                                                             | -1.85093       | -1.22137 | 1.49631                     |
| H                                                             | -1.92821       | 0.50063  | 1.96288                     |
| H                                                             | -4.20377       | -1.32418 | -1.04924                    |
| H                                                             | -4.1387        | 0.43169  | -1.2395                     |
| H                                                             | -4.21598       | -1.0214  | 1.32077                     |
| H                                                             | -4.14528       | 0.72626  | 1.06629                     |
| Zero-point correction=                                        |                |          | 0.163068 (Hartree/Particle) |
| Thermal correction to Energy=                                 |                |          | 0.174819                    |
| Thermal correction to Enthalpy=                               |                |          | 0.175811                    |
| Thermal correction to Gibbs Free Energy=                      |                |          | 0.120184                    |
| SCF Done: E(RB3LYP) =                                         | -495.675649728 |          |                             |
| Thermal correction to Gibbs free energy (ZPG) from GoodVibes: |                |          | 0.126849                    |

#### Int4

|    |         |          |          |
|----|---------|----------|----------|
| C  | 7.5338  | -2.38818 | 0.96421  |
| C  | 6.1918  | -2.03645 | 0.92668  |
| C  | 5.80158 | -0.82063 | 0.33521  |
| C  | 6.76879 | 0.03036  | -0.21865 |
| C  | 8.11728 | -0.31531 | -0.18409 |
| C  | 8.48437 | -1.52268 | 0.40889  |
| H  | 7.8419  | -3.32385 | 1.41715  |
| H  | 5.44062 | -2.69365 | 1.34978  |
| H  | 6.44915 | 0.96284  | -0.67287 |
| H  | 8.86492 | 0.34315  | -0.61095 |
| N  | 3.60517 | -1.09593 | 0.78867  |
| N  | 4.46885 | -0.36227 | 0.23936  |
| C  | 2.25971 | -0.66621 | 0.62944  |
| Br | 10.3295 | -2.01291 | 0.46474  |
| C  | 1.7605  | 0.82261  | -1.49139 |
| C  | 1.85675 | 0.10877  | -0.36446 |
| H  | 1.57522 | -1.08367 | 1.35945  |
| H  | 1.66907 | 0.33239  | -2.46166 |



|                                                               |                |          |                             |
|---------------------------------------------------------------|----------------|----------|-----------------------------|
| H                                                             | 1.91425        | 1.902    | -1.48654                    |
| C                                                             | -3.17777       | 4.21124  | -0.14627                    |
| C                                                             | -4.50612       | 3.56191  | 0.41654                     |
| B                                                             | -3.00057       | 1.92726  | -0.13563                    |
| O                                                             | -2.24538       | 3.08738  | -0.10395                    |
| O                                                             | -4.35489       | 2.16299  | 0.02281                     |
| C                                                             | -5.79529       | 4.10465  | -0.19155                    |
| H                                                             | -6.65542       | 3.58701  | 0.24487                     |
| H                                                             | -5.90416       | 5.1728   | 0.02219                     |
| H                                                             | -5.82651       | 3.96137  | -1.27372                    |
| C                                                             | -4.5902        | 3.5877   | 1.94668                     |
| H                                                             | -4.76134       | 4.60033  | 2.32327                     |
| H                                                             | -5.42729       | 2.96046  | 2.26851                     |
| H                                                             | -3.67685       | 3.1981   | 2.40707                     |
| C                                                             | -3.29149       | 4.64117  | -1.61296                    |
| H                                                             | -3.93401       | 5.51911  | -1.72631                    |
| H                                                             | -2.29615       | 4.89896  | -1.98777                    |
| H                                                             | -3.69255       | 3.83693  | -2.23769                    |
| C                                                             | -2.6097        | 5.34929  | 0.69532                     |
| H                                                             | -1.6879        | 5.72227  | 0.23758                     |
| H                                                             | -3.3177        | 6.18258  | 0.74795                     |
| H                                                             | -2.37638       | 5.02613  | 1.71202                     |
| O                                                             | -2.46432       | 0.69612  | -0.30713                    |
| Ag                                                            | -3.83695       | -0.93017 | -0.26761                    |
| Ag                                                            | -0.35283       | 0.62965  | -0.59844                    |
| O                                                             | -5.18614       | -2.62696 | -0.239                      |
| C                                                             | -5.52631       | -3.36708 | 0.97633                     |
| C                                                             | -6.12659       | -2.94918 | -1.31786                    |
| C                                                             | -6.43629       | -4.48778 | 0.4931                      |
| H                                                             | -4.5902        | -3.70602 | 1.42597                     |
| H                                                             | -6.03939       | -2.68655 | 1.66511                     |
| C                                                             | -7.19738       | -3.81704 | -0.66205                    |
| H                                                             | -6.50843       | -2.01152 | -1.72841                    |
| H                                                             | -5.56673       | -3.4858  | -2.09065                    |
| H                                                             | -7.0961        | -4.84616 | 1.28694                     |
| H                                                             | -5.8419        | -5.33141 | 0.1267                      |
| H                                                             | -8.00865       | -3.19362 | -0.27213                    |
| H                                                             | -7.62239       | -4.53469 | -1.36778                    |
| Zero-point correction=                                        |                |          | 0.442713 (Hartree/Particle) |
| Thermal correction to Energy=                                 |                |          | 0.479691                    |
| Thermal correction to Enthalpy=                               |                |          | 0.480683                    |
| Thermal correction to Gibbs Free Energy=                      |                |          | 0.360624                    |
| SCF Done: E(RB3LYP) =                                         | -4044.14904009 |          |                             |
| Thermal correction to Gibbs free energy (ZPG) from GoodVibes: |                |          | 0.380324                    |

**Int4'**

|    |          |          |          |
|----|----------|----------|----------|
| N  | 3.785    | -0.94517 | 0.81835  |
| N  | 4.58728  | -0.15081 | 0.3724   |
| C  | 2.28137  | -0.75367 | 0.71912  |
| C  | 1.74527  | 0.61766  | -1.44247 |
| C  | 1.8158   | -0.09664 | -0.30994 |
| H  | 1.70327  | -1.14319 | 1.54708  |
| H  | 1.63463  | 0.13171  | -2.41134 |
| H  | 1.91529  | 1.69412  | -1.43053 |
| C  | -3.11995 | 4.0617   | -0.1448  |
| C  | -4.46652 | 3.44935  | 0.41598  |
| B  | -2.99034 | 1.7752   | -0.09923 |
| O  | -2.21178 | 2.91903  | -0.07581 |
| O  | -4.34094 | 2.04134  | 0.04473  |
| C  | -5.73865 | 4.00888  | -0.21198 |
| H  | -6.61325 | 3.51654  | 0.22502  |
| H  | -5.82666 | 5.08239  | -0.01627 |
| H  | -5.76347 | 3.84901  | -1.29198 |
| C  | -4.56257 | 3.50001  | 1.9446   |
| H  | -4.71585 | 4.5216   | 2.30432  |
| H  | -5.41526 | 2.89526  | 2.26856  |
| H  | -3.66122 | 3.09868  | 2.41843  |
| C  | -3.21132 | 4.47019  | -1.61917 |
| H  | -3.83266 | 5.36051  | -1.75217 |
| H  | -2.20724 | 4.69921  | -1.98929 |
| H  | -3.62558 | 3.66545  | -2.23458 |
| C  | -2.53493 | 5.20065  | 0.68369  |
| H  | -1.60147 | 5.54638  | 0.22819  |
| H  | -3.22538 | 6.04956  | 0.71653  |
| H  | -2.31729 | 4.889    | 1.70742  |
| O  | -2.48477 | 0.52809  | -0.25044 |
| Ag | -3.96252 | -1.00933 | -0.24011 |
| Ag | -0.37392 | 0.41276  | -0.53463 |
| O  | -5.43894 | -2.59271 | -0.21262 |
| C  | -5.93746 | -3.19288 | 1.02549  |
| C  | -6.34773 | -2.88679 | -1.32701 |
| C  | -6.93545 | -4.24345 | 0.5594   |
| H  | -5.07555 | -3.59337 | 1.56411  |
| H  | -6.41382 | -2.40923 | 1.62549  |
| C  | -7.54614 | -3.58344 | -0.68756 |
| H  | -6.59692 | -1.94539 | -1.82223 |
| H  | -5.80836 | -3.53547 | -2.02461 |
| H  | -7.67744 | -4.46862 | 1.32921  |

|                                                               |                |          |                             |
|---------------------------------------------------------------|----------------|----------|-----------------------------|
| H                                                             | -6.41713       | -5.17058 | 0.29267                     |
| H                                                             | -8.3044        | -2.84921 | -0.39644                    |
| H                                                             | -8.00601       | -4.30195 | -1.37008                    |
| C                                                             | 4.17248        | -2.17776 | 1.53679                     |
| C                                                             | 3.37379        | -3.3188  | 1.4917                      |
| C                                                             | 5.39027        | -2.1714  | 2.21574                     |
| C                                                             | 3.80035        | -4.4782  | 2.14245                     |
| H                                                             | 2.43973        | -3.32966 | 0.94023                     |
| C                                                             | 5.81292        | -3.32105 | 2.8756                      |
| H                                                             | 5.99382        | -1.27041 | 2.21777                     |
| C                                                             | 5.01144        | -4.46423 | 2.83131                     |
| H                                                             | 3.19402        | -5.37584 | 2.10513                     |
| H                                                             | 6.75218        | -3.32421 | 3.41664                     |
| Br                                                            | 5.59128        | -6.0462  | 3.73501                     |
| Zero-point correction=                                        |                |          | 0.442313 (Hartree/Particle) |
| Thermal correction to Energy=                                 |                |          | 0.479239                    |
| Thermal correction to Enthalpy=                               |                |          | 0.480231                    |
| Thermal correction to Gibbs Free Energy=                      |                |          | 0.359811                    |
| SCF Done: E(RB3LYP) =                                         | -4044.10619635 |          |                             |
| Thermal correction to Gibbs free energy (ZPG) from GoodVibes: |                |          | 0.380124                    |

#### Int4''

|   |          |          |          |
|---|----------|----------|----------|
| N | 3.52014  | -0.53025 | -2.2157  |
| N | 4.12077  | -1.19118 | -1.40412 |
| C | 1.36703  | -1.23876 | 0.28174  |
| C | 1.98718  | -0.17563 | -2.07795 |
| C | 1.50645  | -0.69828 | -0.81048 |
| H | 1.37593  | -1.74404 | 1.22809  |
| H | 1.46192  | -0.63367 | -2.9188  |
| H | 1.89081  | 0.91114  | -2.13379 |
| C | -2.74214 | 3.79694  | 0.11769  |
| C | -4.20738 | 3.41173  | 0.5731   |
| B | -3.02574 | 1.5246   | 0.03597  |
| O | -2.05807 | 2.50746  | 0.16151  |
| O | -4.31278 | 2.02481  | 0.12801  |
| C | -5.32006 | 4.22183  | -0.08435 |
| H | -6.29284 | 3.87474  | 0.27847  |
| H | -5.22805 | 5.28298  | 0.16861  |
| H | -5.30814 | 4.12089  | -1.1716  |
| C | -4.38489 | 3.40758  | 2.09568  |
| H | -4.3759  | 4.42229  | 2.50425  |
| H | -5.34906 | 2.95171  | 2.34124  |
| H | -3.59915 | 2.82933  | 2.59162  |
| C | -2.6706  | 4.29127  | -1.33153 |

|                                                               |                |          |                             |
|---------------------------------------------------------------|----------------|----------|-----------------------------|
| H                                                             | -3.11272       | 5.2859   | -1.44009                    |
| H                                                             | -1.62121       | 4.35254  | -1.63638                    |
| H                                                             | -3.18458       | 3.60874  | -2.01554                    |
| C                                                             | -2.01438       | 4.76711  | 1.04255                     |
| H                                                             | -1.00829       | 4.96056  | 0.65698                     |
| H                                                             | -2.54302       | 5.72443  | 1.09316                     |
| H                                                             | -1.91845       | 4.36845  | 2.05465                     |
| O                                                             | -2.73726       | 0.21666  | -0.15908                    |
| Ag                                                            | -4.36423       | -1.15289 | -0.20144                    |
| Ag                                                            | -0.67863       | -0.32758 | -0.22823                    |
| O                                                             | -5.95349       | -2.6199  | -0.25157                    |
| C                                                             | -6.53471       | -3.2188  | 0.95062                     |
| C                                                             | -6.81497       | -2.86157 | -1.41434                    |
| C                                                             | -7.55703       | -4.21392 | 0.41944                     |
| H                                                             | -5.71779       | -3.66912 | 1.51937                     |
| H                                                             | -7.00129       | -2.42415 | 1.54374                     |
| C                                                             | -8.07443       | -3.50942 | -0.84531                    |
| H                                                             | -6.99571       | -1.9046  | -1.90952                    |
| H                                                             | -6.27047       | -3.52706 | -2.09197                    |
| H                                                             | -8.34591       | -4.4139  | 1.14849                     |
| H                                                             | -7.07056       | -5.16108 | 0.16336                     |
| H                                                             | -8.81126       | -2.7441  | -0.58028                    |
| H                                                             | -8.53265       | -4.19666 | -1.56038                    |
| C                                                             | 4.14293        | 0.04286  | -3.43407                    |
| C                                                             | 3.39371        | 0.61292  | -4.46412                    |
| C                                                             | 5.53507        | -0.02267 | -3.5171                     |
| C                                                             | 4.04603        | 1.12009  | -5.59001                    |
| H                                                             | 2.31349        | 0.66953  | -4.42777                    |
| C                                                             | 6.18867        | 0.4864   | -4.63374                    |
| H                                                             | 6.088          | -0.47571 | -2.70222                    |
| C                                                             | 5.43486        | 1.05399  | -5.6632                     |
| H                                                             | 3.4688         | 1.55917  | -6.39536                    |
| H                                                             | 7.26985        | 0.44126  | -4.69843                    |
| Br                                                            | 6.32631        | 1.75449  | -7.20196                    |
| Zero-point correction=                                        |                |          | 0.442263 (Hartree/Particle) |
| Thermal correction to Energy=                                 |                |          | 0.479507                    |
| Thermal correction to Enthalpy=                               |                |          | 0.480499                    |
| Thermal correction to Gibbs Free Energy=                      |                |          | 0.360061                    |
| SCF Done: E(RB3LYP) =                                         | -4044.10280901 |          |                             |
| Thermal correction to Gibbs free energy (ZPG) from GoodVibes: |                |          | 0.379695                    |

#### Int5

|   |          |          |         |
|---|----------|----------|---------|
| C | -7.6019  | -1.17482 | 0.56321 |
| C | -6.26593 | -1.37885 | 0.88574 |

|    |          |          |          |
|----|----------|----------|----------|
| C  | -5.27507 | -0.64083 | 0.22282  |
| C  | -5.61768 | 0.29841  | -0.75762 |
| C  | -6.95715 | 0.50075  | -1.07783 |
| C  | -7.9383  | -0.23691 | -0.41602 |
| H  | -8.37157 | -1.74232 | 1.07333  |
| H  | -5.99143 | -2.10113 | 1.64463  |
| H  | -4.8573  | 0.87216  | -1.27487 |
| H  | -7.22545 | 1.22658  | -1.83651 |
| N  | -3.53023 | -1.7129  | 1.41294  |
| N  | -3.91046 | -0.84071 | 0.54579  |
| C  | -2.16281 | -1.66489 | 1.51364  |
| Br | -9.77402 | 0.03907  | -0.85546 |
| C  | -2.75103 | -0.11846 | -0.01621 |
| C  | -1.58614 | -0.72131 | 0.6825   |
| H  | -1.69157 | -2.3451  | 2.20984  |
| H  | -2.85812 | 0.95619  | 0.17601  |
| H  | -2.71766 | -0.26552 | -1.10272 |
| C  | 2.62251  | 3.92028  | 0.285    |
| C  | 4.05391  | 3.50992  | -0.24827 |
| B  | 2.77444  | 1.64094  | 0.10731  |
| O  | 1.86444  | 2.68627  | 0.11269  |
| O  | 4.08791  | 2.08022  | 0.03714  |
| C  | 5.22465  | 4.17923  | 0.46522  |
| H  | 6.16828  | 3.82025  | 0.04189  |
| H  | 5.19068  | 5.26542  | 0.33229  |
| H  | 5.2283   | 3.9596   | 1.53494  |
| C  | 4.20096  | 3.66757  | -1.76628 |
| H  | 4.24168  | 4.72051  | -2.06033 |
| H  | 5.13258  | 3.19021  | -2.08588 |
| H  | 3.37399  | 3.19119  | -2.30198 |
| C  | 2.60879  | 4.2492   | 1.78241  |
| H  | 3.11204  | 5.19769  | 1.99192  |
| H  | 1.57114  | 4.33391  | 2.11987  |
| H  | 3.0937   | 3.46378  | 2.37039  |
| C  | 1.93412  | 5.03038  | -0.50319 |
| H  | 0.94852  | 5.23186  | -0.07135 |
| H  | 2.51502  | 5.95726  | -0.45749 |
| H  | 1.79536  | 4.75833  | -1.55169 |
| O  | 2.42438  | 0.33737  | 0.16362  |
| Ag | 3.99733  | -1.08402 | 0.0278   |
| Ag | 0.38028  | -0.18829 | 0.42314  |
| O  | 5.53207  | -2.60002 | -0.16122 |
| C  | 5.99864  | -3.10908 | -1.45054 |
| C  | 6.47625  | -2.95597 | 0.90367  |

|                                                               |                |          |                             |
|---------------------------------------------------------------|----------------|----------|-----------------------------|
| C                                                             | 7.01196        | -4.18437 | -1.08502                    |
| H                                                             | 5.12414        | -3.47588 | -1.99269                    |
| H                                                             | 6.45599        | -2.28275 | -2.00667                    |
| C                                                             | 7.65624        | -3.60766 | 0.18617                     |
| H                                                             | 6.73932        | -2.04447 | 1.44566                     |
| H                                                             | 5.96071        | -3.64649 | 1.57867                     |
| H                                                             | 7.73269        | -4.35399 | -1.8886                     |
| H                                                             | 6.5033         | -5.12953 | -0.86733                    |
| H                                                             | 8.40666        | -2.85478 | -0.07628                    |
| H                                                             | 8.13454        | -4.36938 | 0.8064                      |
| Zero-point correction=                                        |                |          | 0.446715 (Hartree/Particle) |
| Thermal correction to Energy=                                 |                |          | 0.482128                    |
| Thermal correction to Enthalpy=                               |                |          | 0.483120                    |
| Thermal correction to Gibbs Free Energy=                      |                |          | 0.368057                    |
| SCF Done: E(RB3LYP) =                                         | -4044.18528982 |          |                             |
| Thermal correction to Gibbs free energy (ZPG) from GoodVibes: |                |          | 0.385804                    |

### Int6

|    |          |          |          |
|----|----------|----------|----------|
| C  | 7.0545   | -0.69145 | -0.26247 |
| C  | 5.70032  | -0.99176 | -0.38657 |
| C  | 4.74727  | 0.03644  | -0.40121 |
| C  | 5.16586  | 1.37017  | -0.2955  |
| C  | 6.52005  | 1.67152  | -0.15959 |
| C  | 7.4549   | 0.6387   | -0.14458 |
| H  | 7.78556  | -1.49226 | -0.25094 |
| H  | 5.37395  | -2.02091 | -0.47201 |
| H  | 4.44688  | 2.18084  | -0.33495 |
| H  | 6.83561  | 2.70571  | -0.07894 |
| N  | 2.99492  | -1.49769 | -1.00137 |
| N  | 3.37619  | -0.28007 | -0.52417 |
| C  | 1.66412  | -1.45891 | -0.97718 |
| Br | 9.31864  | 1.05276  | 0.0356   |
| C  | 2.28141  | 0.49101  | -0.2065  |
| C  | 1.12683  | -0.22814 | -0.48303 |
| H  | 2.41197  | 1.47871  | 0.2113   |
| C  | -3.28215 | 4.4482   | -0.01902 |
| C  | -4.69719 | 3.94929  | 0.4786   |
| B  | -3.31599 | 2.15905  | 0.08699  |
| O  | -2.46473 | 3.25368  | 0.13127  |
| O  | -4.65499 | 2.53281  | 0.14517  |
| C  | -5.89158 | 4.58459  | -0.22752 |
| H  | -6.8216  | 4.16491  | 0.16971  |
| H  | -5.91384 | 5.66617  | -0.05804 |
| H  | -5.87107 | 4.40173  | -1.30402 |

|                                                               |                |          |                             |
|---------------------------------------------------------------|----------------|----------|-----------------------------|
| C                                                             | -4.86958       | 4.04856  | 1.99937                     |
| H                                                             | -4.96702       | 5.08735  | 2.32896                     |
| H                                                             | -5.7788        | 3.51353  | 2.29129                     |
| H                                                             | -4.02516       | 3.59625  | 2.52857                     |
| C                                                             | -3.26445       | 4.82074  | -1.50671                    |
| H                                                             | -3.80847       | 5.75056  | -1.69845                    |
| H                                                             | -2.22726       | 4.9619   | -1.82596                    |
| H                                                             | -3.70324       | 4.02998  | -2.12314                    |
| C                                                             | -2.66506       | 5.57099  | 0.81009                     |
| H                                                             | -1.68463       | 5.8351   | 0.40086                     |
| H                                                             | -3.29279       | 6.46778  | 0.78056                     |
| H                                                             | -2.52705       | 5.27678  | 1.85273                     |
| O                                                             | -2.90308       | 0.88031  | 0.00058                     |
| Ag                                                            | -4.37875       | -0.63125 | 0.00882                     |
| Ag                                                            | -0.83587       | 0.34861  | -0.23999                    |
| O                                                             | -5.85035       | -2.21668 | 0.002                       |
| C                                                             | -6.48759       | -2.76179 | 1.20048                     |
| C                                                             | -6.24951       | -2.9723  | -1.18645                    |
| C                                                             | -7.57866       | -3.68374 | 0.66914                     |
| H                                                             | -5.72849       | -3.30504 | 1.77403                     |
| H                                                             | -6.85847       | -1.92063 | 1.79096                     |
| C                                                             | -6.96596       | -4.2033  | -0.64164                    |
| H                                                             | -6.91054       | -2.33425 | -1.78287                    |
| H                                                             | -5.34744       | -3.1991  | -1.75946                    |
| H                                                             | -8.49357       | -3.11665 | 0.46735                     |
| H                                                             | -7.8146        | -4.4824  | 1.37657                     |
| H                                                             | -7.71362       | -4.58045 | -1.3436                     |
| H                                                             | -6.2474        | -5.00402 | -0.43722                    |
| H                                                             | 1.11909        | -2.32989 | -1.32437                    |
| Zero-point correction=                                        |                |          | 0.435590 (Hartree/Particle) |
| Thermal correction to Energy=                                 |                |          | 0.470844                    |
| Thermal correction to Enthalpy=                               |                |          | 0.471836                    |
| Thermal correction to Gibbs Free Energy=                      |                |          | 0.354808                    |
| SCF Done: E(RB3LYP) =                                         | -4043.76530164 |          |                             |
| Thermal correction to Gibbs free energy (ZPG) from GoodVibes: |                |          | 0.374909                    |

### TS1

|   |          |          |          |
|---|----------|----------|----------|
| C | -1.08652 | -2.31524 | 2.63466  |
| C | 0.0132   | -1.79852 | 2.14088  |
| C | -2.18395 | -2.8414  | 3.11787  |
| H | -3.16617 | -2.53412 | 2.7612   |
| C | 1.33389  | -3.74205 | -0.84318 |
| C | 2.65293  | -3.22335 | -0.13591 |
| B | 0.79899  | -2.40162 | 0.92937  |

|    |          |          |          |
|----|----------|----------|----------|
| O  | 0.30527  | -3.41055 | 0.13217  |
| O  | 2.15534  | -2.20221 | 0.77204  |
| C  | 3.67742  | -2.58584 | -1.07262 |
| H  | 4.53636  | -2.23274 | -0.49213 |
| H  | 4.04544  | -3.31331 | -1.8042  |
| H  | 3.25622  | -1.73351 | -1.60938 |
| C  | 3.33651  | -4.28467 | 0.73728  |
| H  | 3.79413  | -5.07538 | 0.13458  |
| H  | 4.12579  | -3.80656 | 1.32601  |
| H  | 2.62987  | -4.74479 | 1.43438  |
| C  | 0.99191  | -2.98348 | -2.13124 |
| H  | 1.73296  | -3.16496 | -2.91673 |
| H  | 0.02204  | -3.33718 | -2.49895 |
| H  | 0.90237  | -1.91151 | -1.92528 |
| C  | 1.28933  | -5.24934 | -1.09053 |
| H  | 0.32695  | -5.51729 | -1.53837 |
| H  | 2.07795  | -5.55434 | -1.78685 |
| H  | 1.40099  | -5.82202 | -0.16714 |
| O  | 0.14754  | -0.29406 | -0.55589 |
| Ag | 1.15905  | 1.40946  | -0.21032 |
| Ag | -1.77603 | 0.29069  | -0.42866 |
| H  | 0.42371  | -0.91319 | 2.63153  |
| H  | -2.15768 | -3.60931 | 3.88959  |
| O  | -3.88617 | 0.85068  | -0.31856 |
| C  | -4.82825 | 0.69925  | -1.41996 |
| C  | -4.59281 | 1.14388  | 0.9253   |
| C  | -6.11696 | 1.33403  | -0.91155 |
| H  | -4.39699 | 1.19257  | -2.29427 |
| H  | -4.95144 | -0.36974 | -1.63094 |
| C  | -6.07547 | 0.99664  | 0.58755  |
| H  | -4.24339 | 0.44599  | 1.69021  |
| H  | -4.33263 | 2.16564  | 1.22311  |
| H  | -6.99834 | 0.93149  | -1.41711 |
| H  | -6.09399 | 2.41857  | -1.06388 |
| H  | -6.40462 | -0.03457 | 0.75403  |
| H  | -6.69798 | 1.65853  | 1.19479  |
| O  | 2.33194  | 3.21807  | 0.14546  |
| C  | 2.77892  | 3.65594  | 1.46172  |
| C  | 2.97757  | 4.00126  | -0.90425 |
| C  | 3.42228  | 5.01586  | 1.21705  |
| H  | 1.90471  | 3.68289  | 2.11671  |
| H  | 3.49794  | 2.92358  | 1.84751  |
| C  | 4.03003  | 4.84156  | -0.18408 |
| H  | 3.39306  | 3.30815  | -1.63994 |



|                                                               |                |         |                             |
|---------------------------------------------------------------|----------------|---------|-----------------------------|
| H                                                             | 2.20852        | 4.61756 | -1.3829                     |
| H                                                             | 4.16617        | 5.25889 | 1.97992                     |
| H                                                             | 2.66059        | 5.80314 | 1.21143                     |
| H                                                             | 4.9777         | 4.29597 | -0.12257                    |
| H                                                             | 4.21155        | 5.79041 | -0.69504                    |
| Zero-point correction=                                        |                |         | 0.467833 (Hartree/Particle) |
| Thermal correction to Energy=                                 |                |         | 0.502344                    |
| Thermal correction to Enthalpy=                               |                |         | 0.503336                    |
| Thermal correction to Gibbs Free Energy=                      |                |         | 0.389546                    |
| SCF Done: E(RB3LYP) =                                         | -1361.97461249 |         |                             |
| Thermal correction to Gibbs free energy (ZPG) from GoodVibes: |                |         | 0.408389                    |

### TS1-2S

|                        |          |          |                             |
|------------------------|----------|----------|-----------------------------|
| C                      | 1.20148  | -2.25968 | -1.13207                    |
| C                      | -0.0385  | -1.90512 | -1.35018                    |
| C                      | 2.46184  | -2.69758 | -0.99283                    |
| H                      | 3.26671  | -2.29405 | -1.60557                    |
| C                      | -2.80563 | -0.50221 | 0.81408                     |
| C                      | -2.97088 | 0.27557  | -0.56082                    |
| B                      | -1.0161  | -0.92519 | -0.55141                    |
| O                      | -1.71888 | -1.42727 | 0.52417                     |
| O                      | -1.67987 | 0.09158  | -1.20865                    |
| C                      | -3.23925 | 1.77289  | -0.4224                     |
| H                      | -3.29698 | 2.22855  | -1.41658                    |
| H                      | -4.19335 | 1.9547   | 0.0839                      |
| H                      | -2.44718 | 2.27393  | 0.13736                     |
| C                      | -4.01101 | -0.35185 | -1.49903                    |
| H                      | -5.03019 | -0.22573 | -1.1208                     |
| H                      | -3.94862 | 0.13617  | -2.47681                    |
| H                      | -3.82564 | -1.42017 | -1.64503                    |
| C                      | -2.35621 | 0.38634  | 1.97967                     |
| H                      | -3.11822 | 1.12921  | 2.23746                     |
| H                      | -2.19429 | -0.24553 | 2.86007                     |
| H                      | -1.40631 | 0.8716   | 1.73754                     |
| C                      | -4.02362 | -1.3279  | 1.23033                     |
| H                      | -3.79833 | -1.86553 | 2.1569                      |
| H                      | -4.88724 | -0.68181 | 1.42105                     |
| H                      | -4.30167 | -2.06478 | 0.47366                     |
| O                      | 0.51114  | 0.47433  | 0.74581                     |
| Ag                     | 1.30044  | 2.07919  | -0.22576                    |
| Ag                     | 2.10169  | -0.8579  | 0.51551                     |
| H                      | -0.523   | -2.42989 | -2.18322                    |
| H                      | 2.67658  | -3.59308 | -0.41225                    |
| Zero-point correction= |          |          | 0.230472 (Hartree/Particle) |

Thermal correction to Energy= 0.250139  
 Thermal correction to Enthalpy= 0.251131  
 Thermal correction to Gibbs Free Energy= 0.178007  
 SCF Done: E(RB3LYP) = -896.827405389  
 Thermal correction to Gibbs free energy (ZPG) from GoodVibes: 0.186007

**TS1'**

|    |          |          |          |
|----|----------|----------|----------|
| C  | -5.52395 | -1.62421 | -1.4782  |
| C  | -4.20222 | -1.58565 | -1.05504 |
| C  | -3.5997  | -0.34237 | -0.82472 |
| C  | -4.28562 | 0.8548   | -1.01106 |
| C  | -5.60845 | 0.81119  | -1.44539 |
| C  | -6.21436 | -0.4245  | -1.67021 |
| H  | -6.00711 | -2.57812 | -1.65448 |
| H  | -3.64401 | -2.50134 | -0.8969  |
| H  | -3.81236 | 1.81345  | -0.8476  |
| H  | -6.15327 | 1.73435  | -1.6035  |
| N  | -1.41972 | -1.18264 | -0.37671 |
| N  | -2.22352 | -0.34848 | -0.38824 |
| C  | 0.41944  | 0.13616  | 0.94895  |
| Br | -8.02768 | -0.48152 | -2.253   |
| C  | -1.69726 | 1.52606  | 0.45116  |
| C  | -0.49538 | 0.97736  | 0.87937  |
| H  | -2.44938 | 1.75172  | 1.20317  |
| H  | -1.65154 | 2.20061  | -0.40114 |
| H  | 1.16849  | -0.60931 | 1.14609  |
| O  | 1.58332  | 2.56392  | 0.25752  |
| C  | 2.278    | 3.69183  | 0.93667  |
| B  | 1.04538  | 1.82988  | 1.25014  |
| O  | 1.39487  | 2.12377  | 2.51663  |
| C  | 2.31701  | 4.13865  | 3.51956  |
| H  | 2.45347  | 3.64669  | 4.48666  |
| H  | 3.07035  | 4.92763  | 3.4332   |
| H  | 1.32724  | 4.59804  | 3.50394  |
| C  | 3.79382  | 2.33934  | 2.57619  |
| H  | 4.65507  | 3.01281  | 2.56996  |
| H  | 3.77276  | 1.82201  | 3.53914  |
| H  | 3.93299  | 1.59302  | 1.78894  |
| C  | 1.31685  | 4.87861  | 0.87015  |
| H  | 1.77573  | 5.77269  | 1.30048  |
| H  | 1.0785   | 5.08843  | -0.17614 |
| H  | 0.38224  | 4.67937  | 1.4024   |
| C  | 2.49312  | 3.12245  | 2.40028  |
| C  | 3.5556   | 3.98674  | 0.16359  |

|                                                               |                |         |                             |
|---------------------------------------------------------------|----------------|---------|-----------------------------|
| H                                                             | 3.3035         | 4.33773 | -0.841                      |
| H                                                             | 4.12376        | 4.77664 | 0.66415                     |
| H                                                             | 4.19231        | 3.10547 | 0.06949                     |
| Zero-point correction=                                        |                |         | 0.316236 (Hartree/Particle) |
| Thermal correction to Energy=                                 |                |         | 0.340095                    |
| Thermal correction to Enthalpy=                               |                |         | 0.341086                    |
| Thermal correction to Gibbs Free Energy=                      |                |         | 0.260150                    |
| SCF Done: E(RB3LYP) =                                         | -3442.08717847 |         |                             |
| Thermal correction to Gibbs free energy (ZPG) from GoodVibes: |                |         | 0.26828                     |

## TS2

|    |          |          |          |
|----|----------|----------|----------|
| C  | -1.6758  | 1.92667  | 1.8822   |
| C  | -1.59622 | 0.66306  | 1.91473  |
| H  | -1.72755 | -0.02427 | 2.7388   |
| C  | -1.70279 | 3.27815  | 1.57572  |
| H  | -0.89359 | 3.90522  | 1.95203  |
| H  | -2.67268 | 3.77467  | 1.53374  |
| C  | -3.05676 | -1.84512 | -0.49433 |
| C  | -2.02472 | -2.55619 | 0.47174  |
| B  | -1.37879 | -0.33997 | 0.07578  |
| O  | -2.75623 | -0.45295 | -0.31313 |
| O  | -0.91257 | -1.64437 | 0.46026  |
| C  | -1.53257 | -3.92379 | -0.00933 |
| H  | -0.82133 | -4.33601 | 0.71523  |
| H  | -2.36064 | -4.63523 | -0.10322 |
| H  | -1.02458 | -3.85288 | -0.97389 |
| C  | -2.55128 | -2.69589 | 1.91017  |
| H  | -3.30944 | -3.48251 | 1.98805  |
| H  | -1.71872 | -2.96429 | 2.56935  |
| H  | -2.98924 | -1.76526 | 2.27661  |
| C  | -2.81698 | -2.1922  | -1.97473 |
| H  | -3.09412 | -3.22547 | -2.21002 |
| H  | -3.42747 | -1.52862 | -2.59612 |
| H  | -1.76968 | -2.04196 | -2.2522  |
| C  | -4.52903 | -2.08469 | -0.15305 |
| H  | -5.16455 | -1.54554 | -0.86408 |
| H  | -4.78576 | -3.14809 | -0.21715 |
| H  | -4.7743  | -1.72788 | 0.84984  |
| O  | -0.51895 | 0.46782  | -0.66668 |
| Ag | 1.49101  | 0.05049  | -0.32284 |
| Ag | -1.08906 | 2.63757  | -0.52201 |
| O  | 3.61833  | -0.3044  | -0.06777 |
| C  | 4.34637  | -0.02509 | 1.17177  |
| C  | 4.39682  | -1.18824 | -0.9308  |

|                                                               |                |          |                             |
|---------------------------------------------------------------|----------------|----------|-----------------------------|
| C                                                             | 5.5885         | -0.91219 | 1.11339                     |
| H                                                             | 4.59255        | 1.04191  | 1.17358                     |
| H                                                             | 3.68652        | -0.24657 | 2.01395                     |
| C                                                             | 5.81907        | -1.08132 | -0.39714                    |
| H                                                             | 3.99827        | -2.20545 | -0.84087                    |
| H                                                             | 4.27158        | -0.83753 | -1.95781                    |
| H                                                             | 5.38667        | -1.88293 | 1.57816                     |
| H                                                             | 6.43679        | -0.454   | 1.62766                     |
| H                                                             | 6.41394        | -1.96462 | -0.64233                    |
| H                                                             | 6.3174         | -0.19935 | -0.81364                    |
| Zero-point correction=                                        |                |          | 0.347683 (Hartree/Particle) |
| Thermal correction to Energy=                                 |                |          | 0.374605                    |
| Thermal correction to Enthalpy=                               |                |          | 0.375597                    |
| Thermal correction to Gibbs Free Energy=                      |                |          | 0.283539                    |
| SCF Done: E(RB3LYP) =                                         | -1129.44056232 |          |                             |
| Thermal correction to Gibbs free energy (ZPG) from GoodVibes: |                |          | 0.295986                    |

#### TS2-1S

|   |          |          |          |
|---|----------|----------|----------|
| C | -1.67675 | 1.65235  | -1.63796 |
| C | -0.4698  | 1.29465  | -1.75172 |
| H | 0.25863  | 1.47587  | -2.5285  |
| C | -2.99366 | 1.90663  | -1.27585 |
| H | -3.78095 | 1.40454  | -1.83955 |
| H | -3.24741 | 2.91973  | -0.96212 |
| C | 2.40128  | 1.28607  | 0.73568  |
| C | 2.75257  | 0.31985  | -0.46904 |
| B | 0.43417  | 0.32641  | -0.04732 |
| O | 0.983    | 1.47553  | 0.59975  |
| O | 1.52434  | -0.42038 | -0.63506 |
| C | 3.88416  | -0.67101 | -0.18806 |
| H | 4.0519   | -1.30016 | -1.06936 |
| H | 4.82229  | -0.14906 | 0.02998  |
| H | 3.64919  | -1.32599 | 0.65425  |
| C | 3.06073  | 1.07167  | -1.77321 |
| H | 4.0482   | 1.54381  | -1.7397  |
| H | 3.05524  | 0.36011  | -2.60563 |
| H | 2.32142  | 1.84705  | -1.98197 |
| C | 2.65985  | 0.64072  | 2.10874  |
| H | 3.72859  | 0.52644  | 2.31881  |
| H | 2.22863  | 1.28093  | 2.88513  |
| H | 2.1844   | -0.34173 | 2.18342  |
| C | 3.09004  | 2.65112  | 0.68362  |
| H | 2.77901  | 3.25213  | 1.54485  |
| H | 4.18024  | 2.54975  | 0.72406  |

|                                                               |                |          |                             |
|---------------------------------------------------------------|----------------|----------|-----------------------------|
| H                                                             | 2.82511        | 3.20285  | -0.22103                    |
| O                                                             | -0.59111       | -0.41951 | 0.50968                     |
| Ag                                                            | -0.13269       | -2.43849 | -0.11444                    |
| Ag                                                            | -2.56637       | 0.63263  | 0.54968                     |
| Zero-point correction=                                        |                |          | 0.228875 (Hartree/Particle) |
| Thermal correction to Energy=                                 |                |          | 0.248687                    |
| Thermal correction to Enthalpy=                               |                |          | 0.249678                    |
| Thermal correction to Gibbs Free Energy=                      |                |          | 0.176957                    |
| SCF Done: E(RB3LYP) =                                         | -896.863443760 |          |                             |
| Thermal correction to Gibbs free energy (ZPG) from GoodVibes: |                |          | 0.184269                    |

### TS2'

|    |          |          |          |
|----|----------|----------|----------|
| C  | 3.87436  | -0.82179 | 1.0814   |
| C  | 2.56836  | -0.73977 | 1.18948  |
| H  | 2.14189  | -0.91089 | 2.18338  |
| C  | 5.18746  | -0.76545 | 0.91669  |
| H  | 5.78237  | -1.64329 | 0.67713  |
| H  | 5.72343  | 0.17491  | 1.03856  |
| C  | 1.8038   | 2.37126  | -0.84727 |
| C  | 1.24796  | 2.51839  | 0.63032  |
| B  | 1.13885  | 0.27874  | -0.04531 |
| O  | 1.96464  | 0.95447  | -1.00061 |
| O  | 0.58931  | 1.25768  | 0.84406  |
| C  | 0.22248  | 3.64054  | 0.81804  |
| H  | -0.12168 | 3.6538   | 1.85814  |
| H  | 0.66129  | 4.62087  | 0.60108  |
| H  | -0.65193 | 3.50348  | 0.17752  |
| C  | 2.35396  | 2.68042  | 1.68615  |
| H  | 2.84131  | 3.65882  | 1.61807  |
| H  | 1.90613  | 2.59596  | 2.68223  |
| H  | 3.1144   | 1.90299  | 1.59415  |
| C  | 0.79878  | 2.84257  | -1.91438 |
| H  | 0.66747  | 3.93015  | -1.9132  |
| H  | 1.16973  | 2.547    | -2.90135 |
| H  | -0.18016 | 2.37478  | -1.77188 |
| C  | 3.1509   | 3.05585  | -1.09321 |
| H  | 3.4634   | 2.89061  | -2.13016 |
| H  | 3.08633  | 4.1381   | -0.93333 |
| H  | 3.93012  | 2.6536   | -0.44207 |
| O  | 0.32625  | -0.79647 | -0.43124 |
| Ag | -1.70583 | -0.50126 | -0.17171 |
| Ag | 1.99081  | -2.36914 | -0.28956 |
| O  | -3.8601  | -0.31814 | 0.0712   |
| C  | -4.53494 | -0.29118 | 1.36586  |

|                                                               |                |          |                             |
|---------------------------------------------------------------|----------------|----------|-----------------------------|
| C                                                             | -4.78917       | 0.03338  | -1.00202                    |
| C                                                             | -6.02006       | -0.2857  | 1.0243                      |
| H                                                             | -4.20633       | -1.16795 | 1.92896                     |
| H                                                             | -4.22969       | 0.61769  | 1.89672                     |
| C                                                             | -6.05205       | 0.51068  | -0.29017                    |
| H                                                             | -4.31575       | 0.79632  | -1.62463                    |
| H                                                             | -4.96358       | -0.86716 | -1.6009                     |
| H                                                             | -6.61809       | 0.17163  | 1.81639                     |
| H                                                             | -6.37913       | -1.30797 | 0.86415                     |
| H                                                             | -5.99307       | 1.58514  | -0.08658                    |
| H                                                             | -6.94894       | 0.32075  | -0.88482                    |
| Zero-point correction=                                        |                |          | 0.346945 (Hartree/Particle) |
| Thermal correction to Energy=                                 |                |          | 0.374366                    |
| Thermal correction to Enthalpy=                               |                |          | 0.375358                    |
| Thermal correction to Gibbs Free Energy=                      |                |          | 0.280923                    |
| SCF Done: E(RB3LYP) =                                         | -1129.42735984 |          |                             |
| Thermal correction to Gibbs free energy (ZPG) from GoodVibes: |                |          | 0.29458                     |

### TS2'-1S

|   |          |         |          |
|---|----------|---------|----------|
| C | -2.44432 | 1.81271 | -0.89323 |
| C | -1.62824 | 0.80556 | -1.09565 |
| H | -1.53742 | 0.43164 | -2.11998 |
| C | -3.15768 | 2.89737 | -0.6344  |
| H | -4.21429 | 2.85153 | -0.38248 |
| H | -2.70485 | 3.88657 | -0.68517 |
| C | 1.42648  | 1.87219 | 0.92111  |
| C | 1.81972  | 1.6303  | -0.59555 |
| B | 0.09406  | 0.16688 | 0.03459  |
| O | 0.1922   | 1.15365 | 1.06309  |
| O | 1.17836  | 0.3721  | -0.88715 |
| C | 3.32204  | 1.48314 | -0.85126 |
| H | 3.49746  | 1.29456 | -1.91611 |
| H | 3.8609   | 2.3986  | -0.58322 |
| H | 3.75235  | 0.65217 | -0.28714 |
| C | 1.25755  | 2.69495 | -1.55066 |
| H | 1.75955  | 3.65961 | -1.42265 |
| H | 1.41888  | 2.36527 | -2.5826  |
| H | 0.18484  | 2.83589 | -1.40769 |
| C | 2.43689  | 1.25831 | 1.90737  |
| H | 3.39118  | 1.79595 | 1.9145   |
| H | 2.01463  | 1.30319 | 2.91655  |
| H | 2.63304  | 0.20687 | 1.67475  |
| C | 1.19354  | 3.33874 | 1.29291  |
| H | 0.91422  | 3.40936 | 2.3498   |

|                                                               |                |          |                             |
|---------------------------------------------------------------|----------------|----------|-----------------------------|
| H                                                             | 2.09913        | 3.93812  | 1.14672                     |
| H                                                             | 0.38543        | 3.77844  | 0.70426                     |
| O                                                             | -0.26749       | -1.15632 | 0.31056                     |
| Ag                                                            | 1.41254        | -2.36064 | -0.19488                    |
| Ag                                                            | -2.52117       | -0.73206 | 0.31428                     |
| Zero-point correction=                                        |                |          | 0.228413 (Hartree/Particle) |
| Thermal correction to Energy=                                 |                |          | 0.248592                    |
| Thermal correction to Enthalpy=                               |                |          | 0.249583                    |
| Thermal correction to Gibbs Free Energy=                      |                |          | 0.174385                    |
| SCF Done: E(RB3LYP) =                                         | -896.851284220 |          |                             |
| Thermal correction to Gibbs free energy (ZPG) from GoodVibes: |                |          | 0.183408                    |

### TS3

|    |          |          |          |
|----|----------|----------|----------|
| C  | 8.06802  | -1.47331 | 0.0733   |
| C  | 7.00682  | -2.36262 | 0.01664  |
| C  | 5.70229  | -1.83823 | -0.04615 |
| C  | 5.43703  | -0.46188 | -0.05731 |
| C  | 6.51058  | 0.4158   | -0.0025  |
| C  | 7.81087  | -0.09655 | 0.06458  |
| H  | 9.08314  | -1.84843 | 0.12404  |
| H  | 7.16884  | -3.43459 | 0.02047  |
| H  | 4.41552  | -0.10439 | -0.10707 |
| H  | 6.33428  | 1.48475  | -0.0101  |
| N  | 4.07371  | -3.71264 | -0.12898 |
| N  | 4.65366  | -2.74115 | -0.09556 |
| C  | 1.57221  | -3.61321 | -0.18337 |
| Br | 9.27456  | 1.10803  | 0.14893  |
| C  | 1.715    | -0.98118 | -0.098   |
| C  | 1.57461  | -2.38698 | -0.14449 |
| H  | 1.34217  | -4.65587 | -0.21727 |
| H  | 2.17803  | -0.55054 | -0.99084 |
| H  | 2.17004  | -0.60999 | 0.8251   |
| C  | -2.32493 | 4.06392  | -0.28268 |
| C  | -3.79469 | 3.75144  | 0.2081   |
| B  | -2.61004 | 1.80326  | -0.038   |
| O  | -1.64431 | 2.79949  | -0.03725 |
| O  | -3.90003 | 2.31893  | -0.03745 |
| C  | -4.89938 | 4.46475  | -0.56568 |
| H  | -5.87666 | 4.17277  | -0.16777 |
| H  | -4.80752 | 5.55087  | -0.46231 |
| H  | -4.87833 | 4.2137   | -1.62827 |
| C  | -3.98343 | 3.96339  | 1.71508  |
| H  | -3.97711 | 5.02534  | 1.97797  |
| H  | -4.9492  | 3.54543  | 2.01602  |

|                                                               |                |          |                             |
|---------------------------------------------------------------|----------------|----------|-----------------------------|
| H                                                             | -3.20094       | 3.46019  | 2.29155                     |
| C                                                             | -2.23871       | 4.33513  | -1.78955                    |
| H                                                             | -2.67875       | 5.30162  | -2.05252                    |
| H                                                             | -1.18637       | 4.3481   | -2.08986                    |
| H                                                             | -2.74614       | 3.55586  | -2.36666                    |
| C                                                             | -1.60642       | 5.16516  | 0.49136                     |
| H                                                             | -0.59475       | 5.29513  | 0.0936                      |
| H                                                             | -2.13177       | 6.12012  | 0.38721                     |
| H                                                             | -1.52413       | 4.9271   | 1.554                       |
| O                                                             | -2.33023       | 0.48497  | -0.03847                    |
| Ag                                                            | -3.94914       | -0.87315 | 0.03272                     |
| Ag                                                            | -0.28851       | -0.20271 | -0.07565                    |
| O                                                             | -5.54489       | -2.33407 | 0.10006                     |
| C                                                             | -6.37413       | -2.58854 | 1.28241                     |
| C                                                             | -6.16084       | -2.91402 | -1.09284                    |
| C                                                             | -7.64762       | -3.23413 | 0.74159                     |
| H                                                             | -5.81009       | -3.25838 | 1.93944                     |
| H                                                             | -6.54394       | -1.63676 | 1.79138                     |
| C                                                             | -7.16485       | -3.91987 | -0.54693                    |
| H                                                             | -6.64689       | -2.11128 | -1.65904                    |
| H                                                             | -5.36091       | -3.35298 | -1.69358                    |
| H                                                             | -8.39467       | -2.46841 | 0.50811                     |
| H                                                             | -8.08254       | -3.93236 | 1.46064                     |
| H                                                             | -7.97354       | -4.11291 | -1.25598                    |
| H                                                             | -6.66818       | -4.86868 | -0.31769                    |
| Zero-point correction=                                        |                |          | 0.438455 (Hartree/Particle) |
| Thermal correction to Energy=                                 |                |          | 0.476191                    |
| Thermal correction to Enthalpy=                               |                |          | 0.477183                    |
| Thermal correction to Gibbs Free Energy=                      |                |          | 0.354756                    |
| SCF Done: E(RB3LYP) =                                         | -4044.08568512 |          |                             |
| Thermal correction to Gibbs free energy (ZPG) from GoodVibes: |                |          | 0.375548                    |

### TS3-1S

|   |          |          |          |
|---|----------|----------|----------|
| C | -7.27768 | -0.39192 | 0.47249  |
| C | -6.41664 | -1.37469 | 0.93447  |
| C | -5.04732 | -1.25608 | 0.63058  |
| C | -4.52518 | -0.19142 | -0.11655 |
| C | -5.40024 | 0.78421  | -0.5725  |
| C | -6.76281 | 0.67541  | -0.27427 |
| H | -8.33689 | -0.45689 | 0.692    |
| H | -6.7802  | -2.21526 | 1.51475  |
| H | -3.46363 | -0.14243 | -0.32644 |
| H | -5.02446 | 1.61879  | -1.1523  |
| N | -3.83863 | -3.19303 | 1.60717  |



|                                                               |                |          |                             |
|---------------------------------------------------------------|----------------|----------|-----------------------------|
| N                                                             | -4.20134       | -2.2491  | 1.09923                     |
| C                                                             | -1.35603       | -3.69572 | 1.586                       |
| Br                                                            | -7.95108       | 2.01622  | -0.89815                    |
| C                                                             | -1.05828       | -1.42186 | 0.28498                     |
| C                                                             | -1.15204       | -2.65    | 0.97943                     |
| H                                                             | -1.32822       | -4.6225  | 2.11628                     |
| H                                                             | -1.41603       | -0.56298 | 0.86162                     |
| H                                                             | -1.48221       | -1.44927 | -0.72337                    |
| C                                                             | 3.76676        | 2.68613  | 1.08249                     |
| C                                                             | 5.05099        | 2.41337  | 0.20035                     |
| B                                                             | 3.59078        | 0.64225  | 0.06019                     |
| O                                                             | 2.83706        | 1.67269  | 0.59851                     |
| O                                                             | 4.93591        | 0.98346  | -0.06387                    |
| C                                                             | 6.38162        | 2.67801  | 0.89775                     |
| H                                                             | 7.20774        | 2.44521  | 0.21799                     |
| H                                                             | 6.46888        | 3.73213  | 1.18043                     |
| H                                                             | 6.49849        | 2.06668  | 1.79506                     |
| C                                                             | 5.01266        | 3.12622  | -1.15623                    |
| H                                                             | 5.14924        | 4.20621  | -1.04796                    |
| H                                                             | 5.82361        | 2.74383  | -1.78413                    |
| H                                                             | 4.06648        | 2.94826  | -1.67661                    |
| C                                                             | 3.99276        | 2.41193  | 2.57403                     |
| H                                                             | 4.63644        | 3.16933  | 3.03108                     |
| H                                                             | 3.02781        | 2.43013  | 3.08992                     |
| H                                                             | 4.44601        | 1.42911  | 2.73729                     |
| C                                                             | 3.13345        | 4.06065  | 0.89037                     |
| H                                                             | 2.24559        | 4.14854  | 1.52472                     |
| H                                                             | 3.83072        | 4.85385  | 1.17914                     |
| H                                                             | 2.82779        | 4.22592  | -0.14497                    |
| O                                                             | 3.11252        | -0.56025 | -0.31211                    |
| Ag                                                            | 4.73704        | -1.76162 | -1.13383                    |
| Ag                                                            | 1.03063        | -1.00743 | 0.00286                     |
| Zero-point correction=                                        |                |          | 0.319852 (Hartree/Particle) |
| Thermal correction to Energy=                                 |                |          | 0.350307                    |
| Thermal correction to Enthalpy=                               |                |          | 0.351298                    |
| Thermal correction to Gibbs Free Energy=                      |                |          | 0.249056                    |
| SCF Done: E(RB3LYP) =                                         | -3811.50707035 |          |                             |
| Thermal correction to Gibbs free energy (ZPG) from GoodVibes: |                |          | 0.263701                    |

### TS3a

|   |         |          |         |
|---|---------|----------|---------|
| C | 8.4529  | 0.19172  | 1.09457 |
| C | 7.22147 | 0.37624  | 1.70086 |
| C | 6.07088 | -0.00573 | 0.98379 |
| C | 6.11509 | -0.56517 | -0.302  |

|    |          |          |          |
|----|----------|----------|----------|
| C  | 7.35822  | -0.75039 | -0.88666 |
| C  | 8.51067  | -0.36976 | -0.18808 |
| H  | 9.35713  | 0.48078  | 1.61692  |
| H  | 7.13808  | 0.80261  | 2.69409  |
| H  | 5.19436  | -0.83026 | -0.80862 |
| H  | 7.42655  | -1.18252 | -1.87774 |
| N  | 4.00565  | 0.36058  | 2.32124  |
| N  | 4.85604  | 0.1778   | 1.61249  |
| C  | 1.51562  | 0.25761  | 0.99713  |
| Br | 10.20377 | -0.62123 | -1.00146 |
| C  | 2.90827  | 0.20498  | -1.25663 |
| C  | 2.24824  | 0.22469  | -0.22958 |
| H  | 1.65291  | -0.64008 | 1.60843  |
| H  | 3.34481  | 0.2088   | -2.23123 |
| H  | 1.70541  | 1.16029  | 1.58569  |
| Ag | -0.58011 | 0.34787  | 0.56893  |
| C  | -3.60354 | 3.80512  | -0.49973 |
| C  | -5.00874 | 3.09968  | -0.33411 |
| B  | -3.31739 | 1.57537  | -0.05324 |
| O  | -2.69407 | 2.81041  | 0.05232  |
| O  | -4.65333 | 1.68935  | -0.41893 |
| C  | -6.02361 | 3.41631  | -1.42856 |
| H  | -6.95396 | 2.87132  | -1.23834 |
| H  | -6.25936 | 4.48545  | -1.44257 |
| H  | -5.65847 | 3.12784  | -2.41655 |
| C  | -5.63502 | 3.32302  | 1.04771  |
| H  | -5.98726 | 4.35153  | 1.17074  |
| H  | -6.49413 | 2.65465  | 1.16216  |
| H  | -4.92432 | 3.10297  | 1.8504   |
| C  | -3.20384 | 4.01464  | -1.9654  |
| H  | -3.80393 | 4.79618  | -2.44092 |
| H  | -2.15366 | 4.31967  | -2.00789 |
| H  | -3.31276 | 3.09366  | -2.54658 |
| C  | -3.43867 | 5.10626  | 0.28012  |
| H  | -2.43324 | 5.50803  | 0.11826  |
| H  | -4.15826 | 5.85777  | -0.06091 |
| H  | -3.57387 | 4.95661  | 1.3534   |
| O  | -2.70222 | 0.39758  | 0.17232  |
| Ag | -3.88198 | -1.3508  | 0.03961  |
| O  | -5.02745 | -3.1819  | -0.10825 |
| C  | -5.88419 | -3.6957  | 0.9594   |
| C  | -5.30255 | -3.87758 | -1.36922 |
| C  | -6.38352 | -5.03331 | 0.43091  |
| H  | -5.27517 | -3.76472 | 1.86356  |

|                                                               |                |          |                             |
|---------------------------------------------------------------|----------------|----------|-----------------------------|
| H                                                             | -6.70206       | -2.9844  | 1.12164                     |
| C                                                             | -6.51191       | -4.76246 | -1.07705                    |
| H                                                             | -5.48198       | -3.12565 | -2.14132                    |
| H                                                             | -4.40978       | -4.45744 | -1.62503                    |
| H                                                             | -7.32915       | -5.32598 | 0.89365                     |
| H                                                             | -5.64467       | -5.81897 | 0.62127                     |
| H                                                             | -7.44057       | -4.2224  | -1.28897                    |
| H                                                             | -6.49905       | -5.67479 | -1.67805                    |
| Zero-point correction=                                        |                |          | 0.438644 (Hartree/Particle) |
| Thermal correction to Energy=                                 |                |          | 0.476401                    |
| Thermal correction to Enthalpy=                               |                |          | 0.477393                    |
| Thermal correction to Gibbs Free Energy=                      |                |          | 0.354427                    |
| SCF Done: E(RB3LYP) =                                         | -4044.08569710 |          |                             |
| Thermal correction to Gibbs free energy (ZPG) from GoodVibes: |                |          | 0.375564                    |

### TS3a-1S

|    |          |          |          |
|----|----------|----------|----------|
| C  | -7.45387 | -1.07652 | -0.11364 |
| C  | -6.22695 | -1.65682 | 0.17518  |
| C  | -5.13179 | -0.80871 | 0.40777  |
| C  | -5.22774 | 0.58325  | 0.36729  |
| C  | -6.46644 | 1.15146  | 0.09845  |
| C  | -7.56262 | 0.3184   | -0.14562 |
| H  | -8.31434 | -1.70604 | -0.30824 |
| H  | -6.1092  | -2.7339  | 0.21545  |
| H  | -4.35351 | 1.19446  | 0.55448  |
| H  | -6.57246 | 2.22933  | 0.07392  |
| N  | -3.32865 | -2.32004 | 1.08911  |
| N  | -3.89661 | -1.41316 | 0.7099   |
| C  | -0.70902 | -1.51307 | 0.76342  |
| Br | -9.24951 | 1.10198  | -0.53438 |
| C  | -2.014   | 0.47589  | -0.36408 |
| C  | -1.40703 | -0.44917 | 0.16044  |
| H  | -0.77905 | -1.5598  | 1.85323  |
| H  | -2.37914 | 1.33432  | -0.88437 |
| H  | -0.84095 | -2.48633 | 0.28413  |
| Ag | 1.37113  | -1.05682 | 0.39093  |
| C  | 4.19383  | 2.78612  | 0.44667  |
| C  | 5.48301  | 2.23792  | -0.28905 |
| B  | 3.97018  | 0.54042  | 0.04594  |
| O  | 3.24181  | 1.69874  | 0.25663  |
| O  | 5.3276   | 0.79534  | -0.13588 |
| C  | 6.80975  | 2.65925  | 0.33495  |
| H  | 7.63906  | 2.21826  | -0.22759 |
| H  | 6.92581  | 3.74738  | 0.3019   |

|                                                               |                |          |                             |
|---------------------------------------------------------------|----------------|----------|-----------------------------|
| H                                                             | 6.89275        | 2.33224  | 1.37358                     |
| C                                                             | 5.48936        | 2.53101  | -1.79383                    |
| H                                                             | 5.65869        | 3.59232  | -1.99787                    |
| H                                                             | 6.29802        | 1.96314  | -2.26474                    |
| H                                                             | 4.54666        | 2.23535  | -2.26463                    |
| C                                                             | 4.38768        | 2.95364  | 1.95825                     |
| H                                                             | 5.04641        | 3.79563  | 2.19059                     |
| H                                                             | 3.41539        | 3.14524  | 2.42255                     |
| H                                                             | 4.80801        | 2.05088  | 2.41214                     |
| C                                                             | 3.60517        | 4.06009  | -0.15202                    |
| H                                                             | 2.71118        | 4.3514   | 0.4086                      |
| H                                                             | 4.32197        | 4.88547  | -0.09144                    |
| H                                                             | 3.31935        | 3.92337  | -1.19712                    |
| O                                                             | 3.45733        | -0.70449 | 0.00733                     |
| Ag                                                            | 4.99897        | -2.12372 | -0.58505                    |
| Zero-point correction=                                        |                |          | 0.319636 (Hartree/Particle) |
| Thermal correction to Energy=                                 |                |          | 0.350103                    |
| Thermal correction to Enthalpy=                               |                |          | 0.351095                    |
| Thermal correction to Gibbs Free Energy=                      |                |          | 0.248609                    |
| SCF Done: E(RB3LYP) =                                         | -3811.50776804 |          |                             |
| Thermal correction to Gibbs free energy (ZPG) from GoodVibes: |                |          | 0.263594                    |

### TS3'

|   |         |          |          |
|---|---------|----------|----------|
| C | 1.98774 | -4.31614 | -0.03988 |
| C | 3.23786 | -3.77856 | -0.20829 |
| H | 3.69002 | -3.73711 | -1.19607 |
| C | 0.74915 | -4.59953 | 0.11614  |
| H | 0.29704 | -5.58244 | 0.21157  |
| H | 3.9041  | -3.65861 | 0.64237  |
| C | 1.8432  | 3.14098  | 0.25648  |
| C | 3.10322 | 2.27294  | -0.14079 |
| B | 1.24597 | 0.93847  | 0.01031  |
| O | 0.74355 | 2.23578  | -0.04314 |
| O | 2.63031 | 0.91817  | 0.09785  |
| C | 4.34775 | 2.51441  | 0.70892  |
| H | 5.15678 | 1.85835  | 0.37199  |
| H | 4.69262 | 3.54906  | 0.61024  |
| H | 4.16417 | 2.30757  | 1.76542  |
| C | 3.45558 | 2.37031  | -1.63048 |
| H | 3.87975 | 3.34657  | -1.88404 |
| H | 4.19878 | 1.6039   | -1.871   |
| H | 2.57788 | 2.20022  | -2.2618  |
| C | 1.77473 | 3.45077  | 1.7571   |
| H | 2.53798 | 4.17511  | 2.05695  |

|                                                               |                |          |                             |
|---------------------------------------------------------------|----------------|----------|-----------------------------|
| H                                                             | 0.79336        | 3.8765   | 1.989                       |
| H                                                             | 1.90252        | 2.54566  | 2.35887                     |
| C                                                             | 1.66011        | 4.42188  | -0.55255                    |
| H                                                             | 0.75528        | 4.94199  | -0.22147                    |
| H                                                             | 2.50751        | 5.09973  | -0.40589                    |
| H                                                             | 1.55999        | 4.21669  | -1.62053                    |
| O                                                             | 0.47017        | -0.16085 | -0.01917                    |
| Ag                                                            | 1.31469        | -2.15905 | -0.03651                    |
| Ag                                                            | -1.62435       | 0.10477  | -0.02492                    |
| O                                                             | -3.77584       | 0.34028  | -0.02419                    |
| C                                                             | -4.62441       | 0.17877  | 1.15802                     |
| C                                                             | -4.59072       | 0.48574  | -1.22959                    |
| C                                                             | -6.03301       | -0.01347 | 0.60472                     |
| H                                                             | -4.25058       | -0.67473 | 1.72831                     |
| H                                                             | -4.53287       | 1.08901  | 1.76034                     |
| C                                                             | -5.99177       | 0.78302  | -0.7096                     |
| H                                                             | -4.15381       | 1.2876   | -1.8293                     |
| H                                                             | -4.54778       | -0.45513 | -1.78946                    |
| H                                                             | -6.79373       | 0.3484   | 1.30067                     |
| H                                                             | -6.22304       | -1.07302 | 0.40368                     |
| H                                                             | -6.1073        | 1.85446  | -0.51418                    |
| H                                                             | -6.76232       | 0.47477  | -1.4204                     |
| Zero-point correction=                                        |                |          | 0.347284 (Hartree/Particle) |
| Thermal correction to Energy=                                 |                |          | 0.375164                    |
| Thermal correction to Enthalpy=                               |                |          | 0.376156                    |
| Thermal correction to Gibbs Free Energy=                      |                |          | 0.279897                    |
| SCF Done: E(RB3LYP) =                                         | -1129.46068799 |          |                             |
| Thermal correction to Gibbs free energy (ZPG) from GoodVibes: |                |          | 0.294258                    |

### TS3'-1S

|   |          |          |          |
|---|----------|----------|----------|
| C | -4.14332 | -1.5716  | 0.04817  |
| C | -3.44838 | -2.75244 | 0.02019  |
| H | -3.30986 | -3.28707 | -0.91621 |
| C | -4.58506 | -0.36991 | 0.07178  |
| H | -5.62027 | -0.04192 | 0.09352  |
| H | -3.27969 | -3.31354 | 0.9359   |
| C | 3.24289  | -0.3153  | 0.20208  |
| C | 2.58574  | -1.70024 | -0.18459 |
| B | 0.96319  | -0.09431 | 0.0138   |
| O | 2.15871  | 0.61904  | -0.06851 |
| O | 1.17736  | -1.46135 | 0.0939   |
| C | 3.05358  | -2.89128 | 0.6468   |
| H | 2.53012  | -3.79576 | 0.32085  |
| H | 4.12751  | -3.06034 | 0.51577  |

|                                                               |                |          |                             |
|---------------------------------------------------------------|----------------|----------|-----------------------------|
| H                                                             | 2.85037        | -2.74896 | 1.7103                      |
| C                                                             | 2.69983        | -2.02391 | -1.67945                    |
| H                                                             | 3.72539        | -2.28049 | -1.96164                    |
| H                                                             | 2.05987        | -2.88186 | -1.90736                    |
| H                                                             | 2.371          | -1.18321 | -2.29827                    |
| C                                                             | 3.5729         | -0.20274 | 1.69545                     |
| H                                                             | 4.4218         | -0.83562 | 1.97103                     |
| H                                                             | 3.83503        | 0.83466  | 1.92633                     |
| H                                                             | 2.71701        | -0.48332 | 2.31702                     |
| C                                                             | 4.45522        | 0.08127  | -0.63536                    |
| H                                                             | 4.82875        | 1.05661  | -0.30648                    |
| H                                                             | 5.26597        | -0.64463 | -0.51416                    |
| H                                                             | 4.20948        | 0.15344  | -1.69706                    |
| O                                                             | -0.24196       | 0.50229  | 0.01446                     |
| Ag                                                            | -2.09576       | -0.61485 | 0.03354                     |
| Ag                                                            | -0.13619       | 2.66124  | -0.06945                    |
| Zero-point correction=                                        |                |          | 0.228704 (Hartree/Particle) |
| Thermal correction to Energy=                                 |                |          | 0.249390                    |
| Thermal correction to Enthalpy=                               |                |          | 0.250382                    |
| Thermal correction to Gibbs Free Energy=                      |                |          | 0.173051                    |
| SCF Done: E(RB3LYP) =                                         | -896.882560710 |          |                             |
| Thermal correction to Gibbs free energy (ZPG) from GoodVibes: |                |          | 0.183051                    |

#### TS4

|    |          |          |          |
|----|----------|----------|----------|
| C  | 7.83808  | -1.27434 | 0.81768  |
| C  | 6.46661  | -1.38917 | 0.99847  |
| C  | 5.59175  | -0.6104  | 0.21921  |
| C  | 6.10324  | 0.27845  | -0.73649 |
| C  | 7.47784  | 0.39712  | -0.92232 |
| C  | 8.33116  | -0.38223 | -0.14171 |
| H  | 8.51907  | -1.87007 | 1.41505  |
| H  | 6.06555  | -2.07447 | 1.73644  |
| H  | 5.41469  | 0.87244  | -1.32895 |
| H  | 7.87409  | 1.08424  | -1.66099 |
| N  | 3.68611  | -1.43393 | 1.16619  |
| N  | 4.18701  | -0.65333 | 0.33033  |
| C  | 2.2603   | -1.42542 | 1.23985  |
| Br | 10.2189  | -0.23161 | -0.38457 |
| C  | 2.05096  | 0.29479  | -0.51143 |
| C  | 1.60708  | -0.59266 | 0.42446  |
| H  | 1.83603  | -2.10481 | 1.96549  |
| H  | 2.12086  | 0.01821  | -1.56365 |
| H  | 2.20898  | 1.34471  | -0.26332 |
| C  | -2.67743 | 3.8899   | -0.0111  |

|                                                               |                |          |                             |
|---------------------------------------------------------------|----------------|----------|-----------------------------|
| C                                                             | -4.18472       | 3.47199  | 0.22763                     |
| B                                                             | -2.87615       | 1.60628  | -0.00695                    |
| O                                                             | -1.9708        | 2.63222  | 0.21256                     |
| O                                                             | -4.17602       | 2.06113  | -0.14775                    |
| C                                                             | -5.2018        | 4.2028   | -0.64315                    |
| H                                                             | -6.20887       | 3.83584  | -0.42075                    |
| H                                                             | -5.18538       | 5.27831  | -0.43917                    |
| H                                                             | -5.01191       | 4.04764  | -1.70732                    |
| C                                                             | -4.60411       | 3.53812  | 1.70046                     |
| H                                                             | -4.69279       | 4.5712   | 2.04895                     |
| H                                                             | -5.58042       | 3.05689  | 1.81452                     |
| H                                                             | -3.89048       | 3.0164   | 2.34578                     |
| C                                                             | -2.38947       | 4.31361  | -1.45569                    |
| H                                                             | -2.83903       | 5.28323  | -1.68865                    |
| H                                                             | -1.30711       | 4.40017  | -1.593                      |
| H                                                             | -2.76545       | 3.57784  | -2.17338                    |
| C                                                             | -2.13637       | 4.93275  | 0.96171                     |
| H                                                             | -1.08665       | 5.14163  | 0.73188                     |
| H                                                             | -2.69136       | 5.87215  | 0.87196                     |
| H                                                             | -2.19527       | 4.59127  | 1.99729                     |
| O                                                             | -2.51955       | 0.30356  | -0.07667                    |
| Ag                                                            | -4.10162       | -1.11519 | -0.16785                    |
| Ag                                                            | -0.43253       | -0.11237 | 0.12349                     |
| O                                                             | -5.65723       | -2.6164  | -0.2419                     |
| C                                                             | -6.144         | -3.35635 | 0.92232                     |
| C                                                             | -6.52324       | -2.85121 | -1.4017                     |
| C                                                             | -7.09435       | -4.3936  | 0.34006                     |
| H                                                             | -5.27412       | -3.7768  | 1.43225                     |
| H                                                             | -6.65622       | -2.65376 | 1.58925                     |
| C                                                             | -7.70659       | -3.645   | -0.8551                     |
| H                                                             | -6.79769       | -1.88083 | -1.8221                     |
| H                                                             | -5.94244       | -3.41728 | -2.1372                     |
| H                                                             | -7.84123       | -4.71556 | 1.06968                     |
| H                                                             | -6.53759       | -5.27341 | 0.0006                      |
| H                                                             | -8.49747       | -2.96786 | -0.51621                    |
| H                                                             | -8.12585       | -4.315   | -1.60946                    |
| Zero-point correction=                                        |                |          | 0.442608 (Hartree/Particle) |
| Thermal correction to Energy=                                 |                |          | 0.478623                    |
| Thermal correction to Enthalpy=                               |                |          | 0.479615                    |
| Thermal correction to Gibbs Free Energy=                      |                |          | 0.363261                    |
| SCF Done: E(RB3LYP) =                                         | -4044.14278956 |          |                             |
| Thermal correction to Gibbs free energy (ZPG) from GoodVibes: |                |          | 0.380982                    |

**TS4-1S**

|    |          |          |          |
|----|----------|----------|----------|
| C  | 7.16926  | -1.031   | -0.00133 |
| C  | 5.83823  | -1.42472 | -0.01096 |
| C  | 4.82187  | -0.45212 | -0.00232 |
| C  | 5.152    | 0.91004  | 0.01584  |
| C  | 6.48526  | 1.31059  | 0.0257   |
| C  | 7.48062  | 0.33374  | 0.01698  |
| H  | 7.95822  | -1.77466 | -0.00791 |
| H  | 5.57619  | -2.47653 | -0.02506 |
| H  | 4.35522  | 1.64707  | 0.02229  |
| H  | 6.74099  | 2.36377  | 0.04011  |
| N  | 3.10492  | -1.95282 | -0.02569 |
| N  | 3.44417  | -0.75114 | -0.01039 |
| C  | 1.69806  | -2.19682 | -0.03248 |
| Br | 9.314    | 0.86732  | 0.03033  |
| C  | 1.1305   | 0.20542  | -0.00571 |
| C  | 0.88662  | -1.13595 | -0.02196 |
| H  | 1.41625  | -3.24011 | -0.04537 |
| H  | 1.16277  | 0.78481  | -0.92867 |
| H  | 1.15916  | 0.76337  | 0.9305   |
| C  | -4.10541 | 2.79976  | -0.16988 |
| C  | -5.50156 | 2.14505  | 0.18504  |
| B  | -3.88483 | 0.52497  | -0.00702 |
| O  | -3.17404 | 1.70716  | 0.09821  |
| O  | -5.25499 | 0.73416  | -0.10561 |
| C  | -6.67339 | 2.62312  | -0.6657  |
| H  | -7.58637 | 2.10033  | -0.36298 |
| H  | -6.84097 | 3.69582  | -0.52556 |
| H  | -6.50955 | 2.43268  | -1.72836 |
| C  | -5.85294 | 2.24126  | 1.67363  |
| H  | -6.1061  | 3.26572  | 1.96144  |
| H  | -6.72234 | 1.60833  | 1.87722  |
| H  | -5.02731 | 1.89948  | 2.3055   |
| C  | -3.96498 | 3.15272  | -1.65479 |
| H  | -4.5897  | 4.00872  | -1.92608 |
| H  | -2.92282 | 3.41489  | -1.86165 |
| H  | -4.23723 | 2.3092   | -2.29675 |
| C  | -3.71676 | 3.99489  | 0.69459  |
| H  | -2.73493 | 4.36845  | 0.38657  |
| H  | -4.43728 | 4.81036  | 0.57482  |
| H  | -3.66268 | 3.73118  | 1.75294  |
| O  | -3.34026 | -0.71059 | -0.01142 |
| Ag | -4.96052 | -2.19037 | -0.00381 |
| Ag | -1.21673 | -0.88341 | -0.01846 |



Zero-point correction= 0.323961 (Hartree/Particle)  
 Thermal correction to Energy= 0.352840  
 Thermal correction to Enthalpy= 0.353832  
 Thermal correction to Gibbs Free Energy= 0.255379  
 SCF Done: E(RB3LYP) = -3811.56396032  
 Thermal correction to Gibbs free energy (ZPG) from GoodVibes: 0.269256

**TS5**

|   |          |          |          |
|---|----------|----------|----------|
| N | -3.33473 | -1.61075 | -0.06799 |
| N | -3.02037 | -2.48645 | 0.8585   |
| C | -2.1555  | -0.93975 | -0.55569 |
| C | -1.67348 | -2.51511 | 0.94664  |
| C | -1.04391 | -1.6122  | 0.0729   |
| H | -2.14732 | -0.68069 | -1.61421 |
| H | -1.22247 | -3.20075 | 1.6517   |
| H | -2.21379 | 0.17117  | -0.01305 |
| C | -2.14344 | 1.69074  | 1.76293  |
| O | -0.84066 | 1.40924  | 2.0395   |
| O | -2.83777 | 2.16787  | 2.66681  |
| O | -2.55972 | 1.43657  | 0.56033  |
| K | -5.11691 | 1.83783  | 1.3327   |
| H | -0.41893 | 1.05788  | 1.23699  |
| C | 5.0321   | -3.51324 | -0.09092 |
| C | 6.0632   | -2.35595 | 0.22217  |
| B | 3.97412  | -1.48239 | -0.1327  |
| O | 3.75112  | -2.83464 | 0.06788  |
| O | 5.32425  | -1.16842 | -0.19208 |
| C | 7.36699  | -2.42207 | -0.56728 |
| H | 8.00509  | -1.57433 | -0.29747 |
| H | 7.9155   | -3.34054 | -0.33441 |
| H | 7.1922   | -2.38494 | -1.64461 |
| C | 6.35828  | -2.19985 | 1.71852  |
| H | 6.96487  | -3.02712 | 2.09863  |
| H | 6.91439  | -1.27059 | 1.87716  |
| H | 5.43656  | -2.14905 | 2.30649  |
| C | 5.10121  | -4.00504 | -1.54139 |
| H | 6.01209  | -4.58105 | -1.72936 |
| H | 4.24236  | -4.65375 | -1.73952 |
| H | 5.06773  | -3.17142 | -2.24984 |
| C | 5.07976  | -4.69749 | 0.86963  |
| H | 4.31867  | -5.43173 | 0.58675  |
| H | 6.05496  | -5.19331 | 0.82735  |
| H | 4.88896  | -4.39223 | 1.90064  |
| O | 2.98969  | -0.56597 | -0.25795 |

|                                                               |                |          |                             |
|---------------------------------------------------------------|----------------|----------|-----------------------------|
| Ag                                                            | 3.59043        | 1.46413  | -0.35776                    |
| Ag                                                            | 0.94972        | -1.14685 | -0.10708                    |
| C                                                             | -4.68202       | -1.22456 | -0.27632                    |
| C                                                             | -5.01755       | -0.43608 | -1.38624                    |
| C                                                             | -5.67097       | -1.59783 | 0.64744                     |
| C                                                             | -6.3346        | -0.01354 | -1.5676                     |
| H                                                             | -4.2691        | -0.15098 | -2.11571                    |
| C                                                             | -6.98845       | -1.18163 | 0.46068                     |
| H                                                             | -5.40799       | -2.20471 | 1.50545                     |
| C                                                             | -7.31283       | -0.38985 | -0.64477                    |
| H                                                             | -6.58864       | 0.59349  | -2.42905                    |
| H                                                             | -7.74939       | -1.47512 | 1.17527                     |
| Br                                                            | -9.11713       | 0.18032  | -0.90198                    |
| O                                                             | 4.15102        | 3.55223  | -0.44271                    |
| C                                                             | 4.20101        | 4.42976  | 0.72692                     |
| C                                                             | 4.82823        | 4.17581  | -1.58415                    |
| C                                                             | 4.55177        | 5.79744  | 0.15735                     |
| H                                                             | 3.22563        | 4.38009  | 1.21652                     |
| H                                                             | 4.9731         | 4.05547  | 1.40855                     |
| C                                                             | 5.47514        | 5.43695  | -1.01779                    |
| H                                                             | 5.5431         | 3.45613  | -1.98992                    |
| H                                                             | 4.06539        | 4.39776  | -2.33757                    |
| H                                                             | 5.0366         | 6.43488  | 0.90069                     |
| H                                                             | 3.64966        | 6.30453  | -0.20114                    |
| H                                                             | 6.48509        | 5.21852  | -0.6555                     |
| H                                                             | 5.54143        | 6.22838  | -1.76817                    |
| Zero-point correction=                                        |                |          | 0.472135 (Hartree/Particle) |
| Thermal correction to Energy=                                 |                |          | 0.514384                    |
| Thermal correction to Enthalpy=                               |                |          | 0.515376                    |
| Thermal correction to Gibbs Free Energy=                      |                |          | 0.383536                    |
| SCF Done: E(RB3LYP) =                                         | -4908.73773412 |          |                             |
| Thermal correction to Gibbs free energy (ZPG) from GoodVibes: |                |          | 0.404232                    |

### TS5-1S

|   |          |          |          |
|---|----------|----------|----------|
| N | -2.63635 | -1.01255 | 0.96215  |
| N | -2.29393 | -0.93315 | 2.22678  |
| C | -1.50974 | -0.72469 | 0.10913  |
| C | -0.96363 | -0.70441 | 2.27113  |
| C | -0.37944 | -0.59677 | 0.99794  |
| H | -1.4505  | -1.29073 | -0.82073 |
| H | -0.4914  | -0.62704 | 3.24148  |
| H | -1.74074 | 0.41877  | -0.29787 |
| C | -2.04028 | 2.70696  | -0.03782 |
| O | -0.77058 | 2.87136  | 0.42637  |

|                                          |                |          |                             |
|------------------------------------------|----------------|----------|-----------------------------|
| O                                        | -2.88645       | 3.55046  | 0.277                       |
| O                                        | -2.26455       | 1.66622  | -0.77985                    |
| K                                        | -4.92684       | 2.08245  | -0.608                      |
| H                                        | -0.21628       | 2.1518   | 0.07903                     |
| C                                        | 5.54154        | -2.51276 | -0.44813                    |
| C                                        | 6.61858        | -1.36152 | -0.31857                    |
| B                                        | 4.49843        | -0.49055 | -0.18027                    |
| O                                        | 4.32392        | -1.85032 | 0.00691                     |
| O                                        | 5.80719        | -0.16497 | -0.52341                    |
| C                                        | 7.72469        | -1.39172 | -1.3682                     |
| H                                        | 8.40987        | -0.55306 | -1.20755                    |
| H                                        | 8.30554        | -2.31659 | -1.29204                    |
| H                                        | 7.32574        | -1.3144  | -2.38186                    |
| C                                        | 7.22287        | -1.25752 | 1.08637                     |
| H                                        | 7.89484        | -2.09395 | 1.29947                     |
| H                                        | 7.80211        | -0.33158 | 1.15842                     |
| H                                        | 6.44594        | -1.2342  | 1.85695                     |
| C                                        | 5.29834        | -2.95049 | -1.89696                    |
| H                                        | 6.14702        | -3.51358 | -2.29626                    |
| H                                        | 4.41644        | -3.59763 | -1.92955                    |
| H                                        | 5.11418        | -2.09234 | -2.55075                    |
| C                                        | 5.79259        | -3.73107 | 0.43478                     |
| H                                        | 4.98964        | -4.4612  | 0.29179                     |
| H                                        | 6.73728        | -4.21613 | 0.16848                     |
| H                                        | 5.82391        | -3.46625 | 1.49376                     |
| O                                        | 3.53311        | 0.44153  | -0.04601                    |
| Ag                                       | 4.3991         | 2.43581  | -0.24339                    |
| Ag                                       | 1.55388        | -0.1242  | 0.48103                     |
| C                                        | -4.00039       | -1.06187 | 0.58016                     |
| C                                        | -4.3443        | -1.37722 | -0.74232                    |
| C                                        | -5.00137       | -0.75366 | 1.51469                     |
| C                                        | -5.68418       | -1.37678 | -1.13204                    |
| H                                        | -3.58437       | -1.62994 | -1.47227                    |
| C                                        | -6.34031       | -0.76211 | 1.1265                      |
| H                                        | -4.73156       | -0.50481 | 2.53387                     |
| C                                        | -6.67434       | -1.07183 | -0.19512                    |
| H                                        | -5.94518       | -1.62585 | -2.15434                    |
| H                                        | -7.11059       | -0.52534 | 1.85165                     |
| Br                                       | -8.50878       | -1.08186 | -0.72536                    |
| Zero-point correction=                   |                |          | 0.353355 (Hartree/Particle) |
| Thermal correction to Energy=            |                |          | 0.388483                    |
| Thermal correction to Enthalpy=          |                |          | 0.389474                    |
| Thermal correction to Gibbs Free Energy= |                |          | 0.275690                    |
| SCF Done: E(RB3LYP) =                    | -4676.15892320 |          |                             |

Thermal correction to Gibbs free energy (ZPG) from GoodVibes: 0.292275

**TS5'**

|    |          |          |          |
|----|----------|----------|----------|
| N  | -3.15379 | -1.89439 | -0.11194 |
| N  | -2.4525  | -2.61292 | 0.69572  |
| C  | -2.51598 | -1.85198 | -1.45194 |
| C  | -1.35522 | -3.08115 | 0.01637  |
| C  | -1.28979 | -2.67638 | -1.31064 |
| H  | -3.21681 | -2.25457 | -2.19461 |
| H  | -0.67007 | -3.70935 | 0.57178  |
| H  | -2.30628 | -0.81023 | -1.72266 |
| Ag | 1.19075  | -1.56738 | -1.75638 |
| C  | 0.18269  | 2.9257   | -1.38368 |
| C  | 1.50647  | 3.54026  | -0.77413 |
| B  | 1.63262  | 1.25134  | -0.78753 |
| O  | 0.57359  | 1.5433   | -1.63582 |
| O  | 2.12147  | 2.37799  | -0.14357 |
| C  | 1.28892  | 4.61559  | 0.28599  |
| H  | 2.25644  | 4.96658  | 0.65873  |
| H  | 0.76157  | 5.47676  | -0.13712 |
| H  | 0.7152   | 4.23874  | 1.13534  |
| C  | 2.48636  | 4.0412   | -1.84158 |
| H  | 2.12322  | 4.95137  | -2.32791 |
| H  | 3.4448   | 4.27048  | -1.36562 |
| H  | 2.66243  | 3.28448  | -2.61247 |
| C  | -0.97893 | 2.88836  | -0.38371 |
| H  | -1.37025 | 3.88975  | -0.18205 |
| H  | -1.79174 | 2.28649  | -0.80231 |
| H  | -0.67653 | 2.4383   | 0.56699  |
| C  | -0.27405 | 3.55264  | -2.69749 |
| H  | -1.18417 | 3.05491  | -3.04786 |
| H  | -0.50543 | 4.61406  | -2.56161 |
| H  | 0.4842   | 3.45908  | -3.47775 |
| O  | 2.12572  | 0.00791  | -0.61451 |
| Ag | 3.87441  | -0.19687 | 0.56347  |
| O  | 0.66401  | -3.30053 | -3.12351 |
| H  | -0.20922 | -3.21978 | -2.59211 |
| H  | 0.47988  | -3.01599 | -4.03259 |
| O  | 5.65536  | -0.4944  | 1.75784  |
| C  | 7.02237  | -0.32794 | 1.25248  |
| C  | 5.64897  | -0.51977 | 3.22047  |
| C  | 7.87675  | -0.08631 | 2.49439  |
| H  | 7.2923   | -1.25115 | 0.72973  |
| H  | 7.0259   | 0.50542  | 0.54586  |

|                                                               |                |          |                             |
|---------------------------------------------------------------|----------------|----------|-----------------------------|
| C                                                             | 7.09363        | -0.81565 | 3.59815                     |
| H                                                             | 5.31953        | 0.4603   | 3.58382                     |
| H                                                             | 4.93377        | -1.28462 | 3.5316                      |
| H                                                             | 7.93648        | 0.98464  | 2.71458                     |
| H                                                             | 8.892          | -0.46914 | 2.36631                     |
| H                                                             | 7.33378        | -0.45425 | 4.60099                     |
| H                                                             | 7.28476        | -1.89335 | 3.56094                     |
| C                                                             | -4.35765       | -1.26551 | 0.28784                     |
| C                                                             | -5.06159       | -0.48092 | -0.63441                    |
| C                                                             | -4.83616       | -1.43024 | 1.59577                     |
| C                                                             | -6.24503       | 0.14253  | -0.24825                    |
| H                                                             | -4.7016        | -0.35031 | -1.64832                    |
| C                                                             | -6.01785       | -0.80682 | 1.97834                     |
| H                                                             | -4.28808       | -2.04081 | 2.30268                     |
| C                                                             | -6.71362       | -0.02396 | 1.05428                     |
| H                                                             | -6.7904        | 0.75037  | -0.96064                    |
| H                                                             | -6.39055       | -0.9327  | 2.98829                     |
| Br                                                            | -8.33456       | 0.83304  | 1.58437                     |
| Zero-point correction=                                        |                |          | 0.469444 (Hartree/Particle) |
| Thermal correction to Energy=                                 |                |          | 0.507214                    |
| Thermal correction to Enthalpy=                               |                |          | 0.508206                    |
| Thermal correction to Gibbs Free Energy=                      |                |          | 0.386248                    |
| SCF Done: E(RB3LYP) =                                         | -4120.62038238 |          |                             |
| Thermal correction to Gibbs free energy (ZPG) from GoodVibes: |                |          | 0.406821                    |

### TS5'-1S

|    |         |          |          |
|----|---------|----------|----------|
| C  | 5.66699 | 0.36535  | -1.43786 |
| C  | 4.47075 | 1.06815  | -1.35827 |
| C  | 3.75056 | 1.07587  | -0.15495 |
| C  | 4.22804 | 0.38438  | 0.96534  |
| C  | 5.42668 | -0.31906 | 0.88254  |
| C  | 6.13653 | -0.32406 | -0.31751 |
| H  | 6.22639 | 0.3589   | -2.36607 |
| H  | 4.09715 | 1.6076   | -2.22    |
| H  | 3.67921 | 0.38549  | 1.8998   |
| H  | 5.79653 | -0.85539 | 1.74863  |
| N  | 2.02541 | 2.41736  | -1.06718 |
| N  | 2.53025 | 1.78815  | -0.0628  |
| C  | 0.8517  | 3.00519  | -0.66368 |
| Br | 7.77929 | -1.28938 | -0.43213 |
| C  | 1.66089 | 1.93867  | 1.13085  |
| C  | 0.52844 | 2.77876  | 0.6672   |
| H  | 2.23627 | 2.41109  | 1.93706  |
| Ag | -2.1013 | 1.91401  | 0.85974  |

|                                                               |                |          |                             |
|---------------------------------------------------------------|----------------|----------|-----------------------------|
| C                                                             | -2.11454       | -2.70283 | 1.41981                     |
| C                                                             | -2.80068       | -3.22755 | 0.09408                     |
| B                                                             | -2.80462       | -0.92903 | 0.14335                     |
| O                                                             | -1.88569       | -1.29419 | 1.11299                     |
| O                                                             | -3.47264       | -2.02569 | -0.39323                    |
| C                                                             | -3.84136       | -4.32354 | 0.29848                     |
| H                                                             | -4.27225       | -4.60893 | -0.66663                    |
| H                                                             | -3.3824        | -5.216   | 0.73606                     |
| H                                                             | -4.65399       | -3.99557 | 0.94999                     |
| C                                                             | -1.79282       | -3.64632 | -0.98187                    |
| H                                                             | -1.28182       | -4.57594 | -0.71477                    |
| H                                                             | -2.32383       | -3.81109 | -1.92465                    |
| H                                                             | -1.03691       | -2.87243 | -1.14784                    |
| C                                                             | -3.04338       | -2.75016 | 2.63826                     |
| H                                                             | -3.21704       | -3.77695 | 2.9731                      |
| H                                                             | -2.57924       | -2.19851 | 3.46167                     |
| H                                                             | -4.0122        | -2.28839 | 2.42387                     |
| C                                                             | -0.77613       | -3.35452 | 1.75232                     |
| H                                                             | -0.37305       | -2.91995 | 2.67275                     |
| H                                                             | -0.89859       | -4.42985 | 1.91698                     |
| H                                                             | -0.0428        | -3.20598 | 0.95676                     |
| O                                                             | -3.04735       | 0.33386  | -0.25906                    |
| Ag                                                            | -4.57216       | 0.27444  | -1.82347                    |
| O                                                             | -1.54715       | 3.62868  | 2.23837                     |
| H                                                             | -0.66431       | 3.51693  | 1.72941                     |
| H                                                             | -1.93552       | 4.47702  | 1.9727                      |
| H                                                             | 0.31347        | 3.57627  | -1.41003                    |
| H                                                             | 1.34853        | 0.94796  | 1.48318                     |
| Zero-point correction=                                        |                |          | 0.350835 (Hartree/Particle) |
| Thermal correction to Energy=                                 |                |          | 0.381408                    |
| Thermal correction to Enthalpy=                               |                |          | 0.382400                    |
| Thermal correction to Gibbs Free Energy=                      |                |          | 0.279695                    |
| SCF Done: E(RB3LYP) =                                         | -3888.04080263 |          |                             |
| Thermal correction to Gibbs free energy (ZPG) from GoodVibes: |                |          | 0.294932                    |

### TS6

|   |          |          |          |
|---|----------|----------|----------|
| C | -5.68001 | -0.4154  | -0.49791 |
| C | -4.50251 | -0.96483 | -1.00029 |
| C | -3.47818 | -1.35787 | -0.12705 |
| C | -3.64445 | -1.19331 | 1.25549  |
| C | -4.82765 | -0.65583 | 1.7604   |
| C | -5.83609 | -0.26927 | 0.87997  |
| H | -6.46952 | -0.11682 | -1.1786  |
| H | -4.37294 | -1.0977  | -2.06742 |

|    |          |          |          |
|----|----------|----------|----------|
| H  | -2.85238 | -1.46862 | 1.94307  |
| H  | -4.94946 | -0.53191 | 2.83068  |
| N  | -1.9171  | -1.6678  | -1.93402 |
| N  | -2.28778 | -1.91542 | -0.64433 |
| C  | -0.77573 | -2.34423 | -2.07748 |
| Br | -7.45984 | 0.47776  | 1.5729   |
| C  | -1.37674 | -2.73878 | -0.02222 |
| C  | -0.3565  | -3.06653 | -0.91069 |
| H  | -1.5517  | -3.05961 | 0.99614  |
| Ag | 1.92087  | -2.21362 | -0.17959 |
| C  | 5.97108  | 0.1941   | 0.90687  |
| C  | 5.4192   | 1.65859  | 1.13042  |
| B  | 3.73684  | 0.28053  | 0.40046  |
| O  | 4.74585  | -0.58302 | 0.80678  |
| O  | 4.1393   | 1.6116   | 0.43977  |
| C  | 6.26784  | 2.7693   | 0.51788  |
| H  | 5.7982   | 3.74011  | 0.70718  |
| H  | 7.26695  | 2.78827  | 0.96567  |
| H  | 6.37351  | 2.65034  | -0.56261 |
| C  | 5.12448  | 1.9716   | 2.60275  |
| H  | 6.0438   | 2.08385  | 3.18539  |
| H  | 4.56761  | 2.91203  | 2.66291  |
| H  | 4.51647  | 1.1874   | 3.0644   |
| C  | 6.71855  | 0.02974  | -0.4225  |
| H  | 7.68717  | 0.53851  | -0.40892 |
| H  | 6.89672  | -1.03513 | -0.60164 |
| H  | 6.1344   | 0.421    | -1.26131 |
| C  | 6.81143  | -0.36186 | 2.05307  |
| H  | 7.12923  | -1.38227 | 1.81576  |
| H  | 7.7119   | 0.24234  | 2.20555  |
| H  | 6.25013  | -0.3929  | 2.98937  |
| O  | 2.51382  | -0.12483 | 0.01787  |
| Ag | 1.01875  | 1.2298   | -0.58248 |
| O  | 1.78288  | -4.51084 | -0.39918 |
| H  | 0.78799  | -4.05579 | -0.69791 |
| H  | 2.2329   | -4.78916 | -1.21209 |
| O  | -0.58792 | 2.534    | -1.21255 |
| C  | -1.13334 | 3.61833  | -0.39959 |
| C  | -1.48569 | 2.22464  | -2.33146 |
| C  | -2.17819 | 4.27204  | -1.29401 |
| H  | -1.57696 | 3.18727  | 0.50514  |
| H  | -0.30218 | 4.27154  | -0.12326 |
| C  | -2.72971 | 3.07399  | -2.08415 |
| H  | -0.96431 | 2.50277  | -3.25352 |

|                                                               |                |          |                             |
|---------------------------------------------------------------|----------------|----------|-----------------------------|
| H                                                             | -1.67729       | 1.14908  | -2.32783                    |
| H                                                             | -1.70508       | 4.99445  | -1.96775                    |
| H                                                             | -2.94496       | 4.78967  | -0.71233                    |
| H                                                             | -3.21209       | 3.36531  | -3.0204                     |
| H                                                             | -3.45541       | 2.51924  | -1.4804                     |
| H                                                             | -0.27858       | -2.29745 | -3.04173                    |
| Zero-point correction=                                        |                |          | 0.454535 (Hartree/Particle) |
| Thermal correction to Energy=                                 |                |          | 0.492355                    |
| Thermal correction to Enthalpy=                               |                |          | 0.493346                    |
| Thermal correction to Gibbs Free Energy=                      |                |          | 0.369915                    |
| SCF Done: E(RB3LYP) =                                         | -4120.20262777 |          |                             |
| Thermal correction to Gibbs free energy (ZPG) from GoodVibes: |                |          | 0.392                       |

### TS6-1S

|    |          |          |          |
|----|----------|----------|----------|
| C  | -5.96613 | -0.68495 | -0.85218 |
| C  | -4.83291 | -1.46145 | -0.62261 |
| C  | -3.76791 | -0.94808 | 0.12966  |
| C  | -3.84533 | 0.35165  | 0.64765  |
| C  | -4.98356 | 1.12579  | 0.42819  |
| C  | -6.03496 | 0.60223  | -0.32123 |
| H  | -6.78761 | -1.08816 | -1.43382 |
| H  | -4.76817 | -2.46603 | -1.02207 |
| H  | -3.01916 | 0.77362  | 1.20896  |
| H  | -5.0371  | 2.13109  | 0.83061  |
| N  | -2.35149 | -2.80767 | -0.45325 |
| N  | -2.62207 | -1.74476 | 0.36     |
| C  | -1.22777 | -3.31955 | 0.04226  |
| Br | -7.59645 | 1.67024  | -0.63157 |
| C  | -1.672   | -1.6196  | 1.3415   |
| C  | -0.7253  | -2.63093 | 1.19514  |
| H  | -1.76189 | -0.84761 | 2.093    |
| Ag | 1.49843  | -1.70375 | 0.86067  |
| C  | 2.92188  | 2.73276  | 1.33866  |
| C  | 3.64236  | 3.03766  | -0.03608 |
| B  | 3.0219   | 0.82658  | 0.06602  |
| O  | 2.30294  | 1.44029  | 1.08199  |
| O  | 3.9338   | 1.69809  | -0.52875 |
| C  | 4.9504   | 3.81462  | 0.07851  |
| H  | 5.3809   | 3.9619   | -0.91745 |
| H  | 4.779    | 4.80289  | 0.51757  |
| H  | 5.68484  | 3.28558  | 0.68957  |
| C  | 2.72013  | 3.70459  | -1.06374 |
| H  | 2.49734  | 4.74152  | -0.79521 |
| H  | 3.21584  | 3.70683  | -2.03973 |



|                                                               |                |          |                             |
|---------------------------------------------------------------|----------------|----------|-----------------------------|
| H                                                             | 1.7743         | 3.16331  | -1.1643                     |
| C                                                             | 3.90195        | 2.53973  | 2.502                       |
| H                                                             | 4.3689         | 3.48358  | 2.79911                     |
| H                                                             | 3.35717        | 2.14363  | 3.36445                     |
| H                                                             | 4.69288        | 1.82791  | 2.24609                     |
| C                                                             | 1.83242        | 3.72753  | 1.72891                     |
| H                                                             | 1.38258        | 3.42643  | 2.68044                     |
| H                                                             | 2.24966        | 4.73156  | 1.85876                     |
| H                                                             | 1.03893        | 3.77442  | 0.97991                     |
| O                                                             | 2.86829        | -0.45233 | -0.31656                    |
| Ag                                                            | 4.04606        | -0.91926 | -2.06641                    |
| O                                                             | 1.30782        | -3.1363  | 2.73618                     |
| H                                                             | 0.2707         | -3.02618 | 2.09559                     |
| H                                                             | 1.69512        | -4.00425 | 2.54494                     |
| H                                                             | -0.80651       | -4.19477 | -0.44195                    |
| Zero-point correction=                                        |                |          | 0.335392 (Hartree/Particle) |
| Thermal correction to Energy=                                 |                |          | 0.366146                    |
| Thermal correction to Enthalpy=                               |                |          | 0.367137                    |
| Thermal correction to Gibbs Free Energy=                      |                |          | 0.262013                    |
| SCF Done: E(RB3LYP) =                                         | -3887.61999962 |          |                             |
| Thermal correction to Gibbs free energy (ZPG) from GoodVibes: |                |          | 0.279354                    |

### TS3-1

|    |          |          |          |
|----|----------|----------|----------|
| C  | 7.79442  | -2.04447 | -0.23283 |
| C  | 6.48794  | -2.50848 | -0.14771 |
| C  | 5.43737  | -1.58087 | -0.15553 |
| C  | 5.6694   | -0.20862 | -0.24639 |
| C  | 6.97949  | 0.25592  | -0.332   |
| C  | 8.02563  | -0.66741 | -0.32419 |
| H  | 8.62173  | -2.74488 | -0.22783 |
| H  | 6.27863  | -3.5705  | -0.07608 |
| H  | 4.83229  | 0.48127  | -0.25003 |
| H  | 7.17809  | 1.31869  | -0.40404 |
| N  | 3.62886  | -3.08674 | 0.00956  |
| N  | 4.07716  | -2.00879 | -0.07194 |
| C  | 1.37033  | -3.10243 | 0.10011  |
| Br | 9.82185  | -0.03718 | -0.44133 |
| C  | 1.81922  | -0.54066 | -0.06134 |
| C  | 1.44212  | -1.8648  | 0.02844  |
| H  | 2.09593  | -0.12534 | -1.02909 |
| H  | 2.16271  | -0.01788 | 0.82988  |
| C  | -2.47937 | 4.02831  | -0.11596 |
| C  | -3.94816 | 3.68775  | 0.35999  |
| B  | -2.75214 | 1.75838  | 0.04833  |

|                                                               |                |          |                             |
|---------------------------------------------------------------|----------------|----------|-----------------------------|
| O                                                             | -1.7912        | 2.75787  | 0.08421                     |
| O                                                             | -4.04375       | 2.26292  | 0.06075                     |
| C                                                             | -5.05577       | 4.42182  | -0.38916                    |
| H                                                             | -6.03174       | 4.10901  | -0.00425                    |
| H                                                             | -4.9707        | 5.5037   | -0.2444                     |
| H                                                             | -5.03098       | 4.21121  | -1.46038                    |
| C                                                             | -4.14126       | 3.84155  | 1.87326                     |
| H                                                             | -4.1417        | 4.89311  | 2.17486                     |
| H                                                             | -5.10524       | 3.40733  | 2.15623                     |
| H                                                             | -3.35699       | 3.32248  | 2.43303                     |
| C                                                             | -2.39191       | 4.35575  | -1.61113                    |
| H                                                             | -2.83982       | 5.32775  | -1.83762                    |
| H                                                             | -1.33919       | 4.38997  | -1.9085                     |
| H                                                             | -2.89199       | 3.59506  | -2.21874                    |
| C                                                             | -1.76945       | 5.10326  | 0.70101                     |
| H                                                             | -0.75871       | 5.25648  | 0.30935                     |
| H                                                             | -2.30238       | 6.05726  | 0.63364                     |
| H                                                             | -1.68642       | 4.82462  | 1.75364                     |
| O                                                             | -2.45591       | 0.44222  | 0.00756                     |
| Ag                                                            | -4.08033       | -0.91915 | -0.01163                    |
| Ag                                                            | -0.36901       | -0.09136 | -0.01607                    |
| C                                                             | 1.28602        | -4.55611 | 0.1845                      |
| H                                                             | 0.24997        | -4.90982 | 0.24386                     |
| H                                                             | 1.75079        | -5.01053 | -0.69668                    |
| H                                                             | 1.81805        | -4.91147 | 1.07318                     |
| O                                                             | -5.67466       | -2.38199 | -0.05692                    |
| C                                                             | -6.57353       | -2.65691 | 1.06932                     |
| C                                                             | -6.23043       | -2.91886 | -1.29904                    |
| C                                                             | -7.82276       | -3.26738 | 0.4389                      |
| H                                                             | -6.05663       | -3.35344 | 1.73721                     |
| H                                                             | -6.7592        | -1.71741 | 1.59513                     |
| C                                                             | -7.27756       | -3.92396 | -0.83992                    |
| H                                                             | -6.6725        | -2.09316 | -1.86812                    |
| H                                                             | -5.4036        | -3.35307 | -1.86594                    |
| H                                                             | -8.54455       | -2.48384 | 0.18598                     |
| H                                                             | -8.30763       | -3.9786  | 1.11173                     |
| H                                                             | -8.04769       | -4.08349 | -1.59845                    |
| H                                                             | -6.80835       | -4.88674 | -0.61128                    |
| Zero-point correction=                                        |                |          | 0.467338 (Hartree/Particle) |
| Thermal correction to Energy=                                 |                |          | 0.506526                    |
| Thermal correction to Enthalpy=                               |                |          | 0.507518                    |
| Thermal correction to Gibbs Free Energy=                      |                |          | 0.383416                    |
| SCF Done: E(RB3LYP) =                                         | -4083.43140416 |          |                             |
| Thermal correction to Gibbs free energy (ZPG) from GoodVibes: |                |          | 0.402775                    |

**TS3-1'**

|    |          |          |          |
|----|----------|----------|----------|
| C  | -7.59379 | -0.33653 | -2.73723 |
| C  | -6.23821 | -0.10331 | -2.90237 |
| C  | -5.39592 | -0.29763 | -1.79055 |
| C  | -5.86466 | -0.7178  | -0.53843 |
| C  | -7.22352 | -0.95342 | -0.39393 |
| C  | -8.07265 | -0.75874 | -1.48975 |
| H  | -8.2694  | -0.19351 | -3.57215 |
| H  | -5.83141 | 0.21889  | -3.85412 |
| H  | -5.16535 | -0.84831 | 0.27797  |
| H  | -7.61525 | -1.28167 | 0.56124  |
| N  | -3.02851 | 0.14201  | -2.40857 |
| N  | -4.04431 | -0.06741 | -1.96987 |
| C  | -1.16562 | 0.23458  | -0.40331 |
| Br | -9.9309  | -1.07424 | -1.28242 |
| C  | -3.01003 | -0.02267 | 1.48706  |
| C  | -2.16328 | 0.08964  | 0.61275  |
| H  | -1.26716 | 1.15065  | -0.9935  |
| Ag | 0.7577   | 0.44958  | 0.51852  |
| C  | 3.35957  | 4.06581  | 2.12152  |
| C  | 4.79925  | 3.41871  | 2.20877  |
| B  | 3.23718  | 1.81418  | 1.70973  |
| O  | 2.59109  | 3.01747  | 1.46501  |
| O  | 4.49061  | 1.99683  | 2.28228  |
| C  | 5.60958  | 3.80905  | 3.44129  |
| H  | 6.57818  | 3.29901  | 3.42284  |
| H  | 5.79983  | 4.88719  | 3.45654  |
| H  | 5.0992   | 3.53261  | 4.36637  |
| C  | 5.63234  | 3.63252  | 0.93923  |
| H  | 5.95789  | 4.67222  | 0.83928  |
| H  | 6.52514  | 3.00116  | 0.98733  |
| H  | 5.07076  | 3.35865  | 0.04064  |
| C  | 2.72011  | 4.29845  | 3.49584  |
| H  | 3.20462  | 5.11879  | 4.03377  |
| H  | 1.66574  | 4.55778  | 3.3588   |
| H  | 2.76992  | 3.39977  | 4.11853  |
| C  | 3.2728   | 5.33601  | 1.28033  |
| H  | 2.2397   | 5.69792  | 1.26469  |
| H  | 3.8984   | 6.12779  | 1.70536  |
| H  | 3.58529  | 5.16146  | 0.24855  |
| O  | 2.71252  | 0.60585  | 1.42517  |
| Ag | 3.89593  | -1.09858 | 1.81901  |
| C  | -3.90476 | -0.13042 | 2.64059  |

|                                                               |                |          |                             |
|---------------------------------------------------------------|----------------|----------|-----------------------------|
| H                                                             | -4.76761       | 0.54057  | 2.54981                     |
| H                                                             | -4.29019       | -1.15026 | 2.75798                     |
| H                                                             | -3.38492       | 0.13102  | 3.57126                     |
| H                                                             | -1.06021       | -0.64033 | -1.05259                    |
| O                                                             | 5.04287        | -2.89946 | 2.17516                     |
| C                                                             | 6.21452        | -3.29352 | 1.38619                     |
| C                                                             | 4.97997        | -3.66678 | 3.41819                     |
| C                                                             | 6.985          | -4.26437 | 2.27816                     |
| H                                                             | 5.84715        | -3.76652 | 0.46974                     |
| H                                                             | 6.77378        | -2.39011 | 1.13135                     |
| C                                                             | 5.88273        | -4.86604 | 3.16519                     |
| H                                                             | 5.34901        | -3.03701 | 4.23578                     |
| H                                                             | 3.93158        | -3.91789 | 3.59467                     |
| H                                                             | 7.71384        | -3.72406 | 2.89117                     |
| H                                                             | 7.51828        | -5.01539 | 1.69049                     |
| H                                                             | 6.26812        | -5.28896 | 4.0961                      |
| H                                                             | 5.33635        | -5.64786 | 2.62698                     |
| Zero-point correction=                                        |                |          | 0.467395 (Hartree/Particle) |
| Thermal correction to Energy=                                 |                |          | 0.506939                    |
| Thermal correction to Enthalpy=                               |                |          | 0.507931                    |
| Thermal correction to Gibbs Free Energy=                      |                |          | 0.380527                    |
| SCF Done: E(RB3LYP) =                                         | -4083.42405164 |          |                             |
| Thermal correction to Gibbs free energy (ZPG) from GoodVibes: |                |          | 0.402515                    |
